# Supplementary material for: Integration host factor regulates colonization factors in the bee gut symbiont Frischella perrara
Source: eLife. 2023 Apr 14;12:e76182. doi: 10.7554/eLife.76182 (PMC10104596; doi:10.7554/eLife.76182)
Supplement: Figure 1—figure supplement 2—source data 1. [file elife-76182-fig1-figsupp2-data1.xlsx]

## Sheet: Fig1 - fig sup 2A, growth curve
	0	1	2	3	4	5	6	7	8	9	10	11	12	13	14	26.5
wt	0.04	0.06	0.1	0.12	0.16	0.26	0.26	0.38	0.48	0.62	0.7	0.82	0.86	0.86	0.86	0.8
wt	0.04	0.06	0.1	0.12	0.16	0.2	0.28	0.4	0.52	0.68	0.8	0.92	0.92	0.94	0.92	0.88
wt	0.04	0.06	0.1	0.12	0.16	0.22	0.26	0.38	0.48	0.58	0.7	0.8	0.86	0.86	0.84	0.84
ihfA	0.04	0.06	0.1	0.14	0.18	0.24	0.3	0.42	0.52	0.66	0.78	0.84	0.88	1.02	0.9	1.04
ihfA	0.04	0.06	0.12	0.16	0.22	0.28	0.36	0.52	0.64	0.78	0.86	0.92	0.94	1.06	1.02	1.02
ihfA	0.04	0.08	0.14	0.18	0.24	0.3	0.4	0.54	0.68	0.78	0.86	0.92	0.94	1.04	0.96	1

## Sheet: Fig1 - fig sup 2B, cell lenght
wild type	ihfa
1.68077	2.57392
1.4116	4.29877
3.39522	1.25348
1.97217	1.06779
1.15151	2.84485
1.47542	1.20538
1.10189	5.75688
1.90387	1.22466
7.64135	1.09052
3.46437	25.0067
1.01872	1.36717
0.985655	2.03492
3.55477	8.82538
1.37626	1.61133
1.48393	3.47549
1.14551	1.48405
1.78649	3.03266
1.5093	2.06932
1.71198	3.28969
1.85828	2.81834
1.53567	1.62015
1.40858	2.99625
5.7419	3.16051
1.03307	3.47765
13.6093	6.34507
1.04003	1.75985
2.46831	38.5588
1.57535	10.5065
1.25151	6.40985
1.07386	0.933425
3.39453	1.01136
1.40703	1.24785
8.15474	1.47288
5.2751	2.94084
1.42101	2.50368
2.02419	6.17084
1.18045	1.71052
9.33613	20.3363
1.21779	2.73383
2.03581	5.54403
1.85017	5.07159
6.99035	20.7672
1.1152	4.04446
1.42114	22.8776
1.13845	1.327
3.417	5.75717
1.41104	8.63706
6.29836	7.13167
1.1719	1.33657
1.07143	18.5294
6.49879	1.98914
9.80245	5.41253
2.21699	21.3364
1.8193	4.00671
1.68965	4.15578
2.28596	3.16947
1.68471	1.74076
5.49483	1.68493
1.30601	6.21361
1.82411	2.84281
1.52973	2.4168
1.77044	2.30994
1.12021	5.47286
1.35493	2.78762
1.3976	1.16262
1.44287	6.01886
2.36742	1.82094
1.57398	1.40998
1.2232	6.51623
3.75983	2.80297
4.78489	2.31279
6.67844	2.73097
17.2811	2.98619
7.94886	2.25949
7.4732	1.90358
4.56335	1.78005
1.62736	1.98594
1.09967	2.3354
1.13557	2.10711
1.02925	2.5589
1.37952	1.19053
1.36187	1.14116
1.21966	1.862
1.79362	5.29928
2.46297	21.7755
1.22969	2.764
6.93922	2.32822
8.98433	3.80001
9.04709	1.36732
1.4732	8.45489
1.32658	4.33552
1.08909	2.61254
1.02827	7.31389
1.52628	2.29204
1.75883	9.31129
6.79486	2.82616
1.59266	1.92885
12.4383	11.0576
2.0259	3.49358
1.46362	1.28769
1.29165	17.1107
1.20681	1.55111
1.22339	5.62907
1.42261	2.16021
9.2057	1.6134
1.31529	3.591
13.6704	5.05948
3.75953	1.4219
1.32441	3.73383
9.2622	3.53989
1.08485	2.07109
1.3752	21.5598
1.3953	2.13192
4.60418	1.93672
6.56581	11.3317
1.27299	2.30769
0.958009	2.35299
1.77963	2.46137
1.23699	1.7995
1.51008	1.79975
1.46292	4.26222
1.02097	3.18295
0.98026	2.20036
15.2564	4.5587
1.50877	5.05199
1.59013	2.76031
15.2752	2.84043
2.14348	3.14007
4.69319	2.5072
1.43572	2.39428
0.971585	1.252
7.81856	1.78036
1.71313	2.85673
1.05571	1.79753
1.34425	9.13501
2.44168	5.19443
1.15822	1.78288
1.94326	3.79873
1.05577	2.68998
1.709	8.0883
1.21509	5.37199
1.21454	1.66759
1.30256	2.16668
1.55137	1.24666
1.45537	2.06531
1.12188	2.33341
0.984972	1.10992
9.65627	1.90218
1.03385	21.6101
1.4378	17.525
1.36403	3.15455
1.06855	7.76914
1.61578	14.0785
1.05946	4.17979
1.33715	2.59358
1.05844	26.8375
1.26065	31.2589
1.62592	1.4041
5.03872	1.79156
1.43295	1.50179
1.54335	3.46462
6.05947	1.91385
5.55255	1.0624
0.984281	4.24938
2.23384	1.33859
3.82377	2.51529
2.06341	1.63091
1.02622	3.58688
1.24508	2.40127
1.23856	1.02367
0.93908	4.3909
5.98633	2.34081
1.32927	1.90754
3.76782	2.54605
1.18061	1.18056
1.17536	1.42319
2.05474	2.66072
1.19341	2.94004
1.0948	1.2282
8.17331	1.74789
2.4975	3.3617
3.31454	3.79971
2.63847	1.93344
1.23129	1.62665
3.724	87.0691
10.3922	1.42395
1.28263	21.4175
3.19021	2.14131
6.66594	3.06351
8.28266	6.45207
1.19929	1.69194
2.23945	16.8196
1.59228	2.08635
1.12531	1.52439
1.04752	1.26215
1.34303	1.61116
2.28925	1.68934
0.987115	3.90827
1.47562	3.25709
1.01382	1.99744
8.12998	1.3897
1.26208	2.11608
1.26614	1.92988
1.3338	1.20556
1.07599	1.15179
1.95774	1.67097
1.94803	2.82514
1.30918	11.3696
11.9574	10.7381
1.282	2.50351
1.27528	1.72689
1.23446	2.39054
3.0954	5.17206
1.60368	3.15371
2.0074	5.86019
1.76748	4.33262
1.4961	2.22374
1.44292	1.9195
1.15329	2.07961
1.39371	1.63174
2.31984	2.02076
0.910407	1.82628
0.8126	5.21103
0.910078	4.34672
0.792069	1.23681
0.953333	2.28713
0.953143	1.20027
0.894856	3.33297
1.12115	3.18461
1.05328	9.17707
1.05576	2.70139
0.979467	3.02284
0.922682	13.6801
0.911923	19.0232
0.925203	2.09827
0.984269	4.25393
0.784107	22.3809
1.05052	3.15761
0.908183	1.65259
0.988682	4.6146
0.924349	2.12086
0.965208	4.33547
0.937738	3.12984
0.966493	5.47034
1.07206	4.10424
0.882638	1.70415
0.889744	4.11789
0.863487	2.61635
1.28672	24.127
0.849235	2.87929
0.853407	1.33537
1.16553	2.20752
0.854872	3.92049
0.884668	2.8466
0.805497	2.2114
1.29059	2.01837
0.885742	1.45223
0.929362	1.65381
1.33822	2.66667
0.963236	1.54097
1.04178	4.7657
1.87642	1.3607
1.34265	1.70819
0.976948	1.37487
0.944264	2.40979
0.957011	1.34387
0.896929	3.42924
1.10919	3.7531
1.30844	15.5788
0.987905	2.18442
0.963634	7.69922
1.14921	1.63087
1.02253	3.36151
1.23098	24.4686
1.27554	36.1498
1.15083	3.69412
1.3932	3.68352
0.895868	22.4626
1.12253	8.16738
1.19979	4.60993
1.17314	45.3303
1.111	1.6328
1.01911	6.90706
1.13888	2.08181
0.893119	3.59483
0.958941	1.41976
1.05884	1.78955
0.906969	2.21055
0.90382	2.18832
1.06377	10.0421
1.0388	8.15992
0.944265	3.46386
0.930847	4.2469
0.986756	13.5989
0.989607	2.77353
0.913138	5.69825
1.17541	4.51251
0.877087	1.44297
0.931392	5.11218
0.960192	10.9132
1.1023	11.053
1.10161	1.74266
1.04918	11.1399
1.50388	9.94127
1.14589	13.0243
0.971428	1.64913
0.979169	3.32186
1.28925	3.69807
1.10576	2.15383
1.32118	4.20017
0.982723	14.4952
1.35119	9.59336
1.00885	12.1592
0.954544	11.3806
1.08711	1.39444
1.10367	1.22035
0.992208	2.81812
1.45952	1.59962
1.10133	3.73407
1.13697	2.59959
0.989748	5.85893
1.04688	5.98844
0.964038	3.11309
0.994492	1.64403
1.00264	1.56889
1.13205	1.50364
1.50949	1.0323
0.996509	5.82421
1.04817	4.34025
1.08165	1.27006
1.0761	4.66127
1.07859	1.80811
1.01288	8.7811
0.916079	1.99914
1.2647	7.29444
1.31738	8.35281
1.21993	4.29913
1.04957	1.41013
1.07408	1.10475
1.07681	3.66468
1.05107	5.83935
1.19508	6.4436
1.05579	3.49979
1.06945	1.09847
1.03771	1.26977
0.957982	2.17842
1.6136	1.22319
1.10313	1.85093
1.33361	3.9779
1.16562	2.65484
1.15003	1.03837
1.05443	1.67293
1.0699	34.6386
1.09706	5.4236
0.953659	2.21522
1.01059	3.12782
1.15211	53.2217
1.29288	3.9563
1.17227	4.73169
1.05978	3.26582
1.04736	3.61369
1.14099	34.9278
1.02397	21.4312
1.06963	1.87834
1.53304	0.985093
1.03328	6.41047
1.05637	2.5044
1.21584	1.80649
1.04513	1.67591
1.17386	9.31903
1.2281	9.94177
0.912155	3.23141
1.07136	1.95921
1.1994	20.0919
1.07088	2.36633
1.12698	2.17607
0.983741	9.37604
1.2065	1.56416
1.29248	2.36926
1.10579	20.8158
1.11611	18.1468
1.13261	11.4765
1.17714	1.94993
1.06136	20.9261
1.19365	2.54465
1.1864	1.45279
1.14415	4.08427
1.07953	3.15794
1.42257	1.76556
1.12622	9.28042
1.29754	2.26672
1.07781	1.46902
1.02772	5.84045
1.04008	4.08313
1.134	2.66196
1.19488	1.64711
1.11914	2.39246
1.22047	6.67127
1.65927	2.49167
1.13624	2.39768
1.07508
1.07195
1.26839
1.30754
1.13828
1.39259
1.2011
1.20747
1.54628
1.17691
1.11528
1.20195
1.14075
1.08645
1.01501
1.25563
1.17898
1.05579
1.07542
1.10756
1.6768
1.23387
1.18305
1.09324
1.23865
1.12877
1.17056
0.991753
1.02151
1.47784
1.27469
1.16699
1.26157
1.06593
1.40169
1.2435
1.34057
1.21451
1.16992
1.65252
1.20372
1.22872
1.19629
1.15435
1.25001
1.25986
1.47587
1.31369
1.09938
1.16011
1.25031
1.13344
1.37256
0.958823
1.04811
1.42173
1.14333
1.31079
1.18767
1.17999
1.204
1.22455
1.36267
1.23384
1.34259
1.31548
1.36212
1.3053
1.17577
1.65544
1.25998
1.11157
1.78525
1.3262
1.12063
1.25165
1.70282
1.29788
1.19679
1.38536
1.25011
1.59013
1.10418
1.24043
1.60498
1.19101
1.3691
1.20616
1.14767
1.3902
1.47564
1.42294
1.28389
1.36695
1.1244
1.31658
1.27491
1.2606
1.43802
1.22161
1.27463
1.44402
1.18603
1.1584
1.43173
1.29174
1.14268
1.04642
1.62832
1.25375
1.02342
1.04437
1.60112
1.31592
1.50042
1.40957
1.44095
1.41481
1.30309
1.487
1.37627
1.38502
1.56712
1.4089
1.57187
1.27254
1.40466
1.26947
1.35577
1.48035
1.41403
1.35904
1.26224
1.1002
1.48553
1.16983
1.32685
1.28055
1.59629
1.33346
1.39997
1.4569
1.64346
1.34111
1.35332
1.36123
1.47438
1.41125
1.41966
1.55187
1.52958
1.32535
1.62573
1.48938
1.44358
1.25697
1.65623
1.82732
1.48943
1.60467
1.47977
1.32549
1.46844
1.50354
1.39485
1.69712
1.30143
1.24948
1.277
2.21693
1.53104
1.27785
1.20282
1.37374
1.21199
1.41763
1.47891
1.45365
1.54323
1.65301
1.359
2.06865
1.70634
1.39859
1.37248
1.36519
1.54973
1.5078
1.20766
1.49801
1.32323
1.48
1.899
1.33784
1.80572
1.40983
1.46867
1.35899
1.45246
1.58499
1.74353
1.36411
1.66071
1.48009
1.30161
1.40778
1.57998
1.40423
1.39451
1.36942
1.40713
1.60981
1.58939
1.40374
1.16293
1.41475
1.51106
1.66791
1.67726
1.39593
1.47226
1.48089
1.30429
1.87888
1.6894
1.78424
1.52182
1.42312
1.6112
1.69593
1.60454
1.81913
1.98196
1.72998
1.82883
1.61868
1.68685
1.39793
1.82908
1.51381
1.80249
1.5304
1.51602
1.81204
1.67683
1.71528
2.12026
1.41254
1.58215
1.54545
1.51586
1.65097
1.54392
1.60358
1.5116
1.88324
1.46928
1.55112
1.674
2.09581
1.58931
1.72121
1.35327
2.0156
1.57865
1.83198
1.98229
1.39099
1.92939
1.24027
2.02824
1.54868
1.87506
1.99424
1.70995
1.48863
1.49774
1.70913
1.42513
1.87791
1.78623
2.16119
1.81987
1.89744
2.12742
2.08804
1.92584
2.06044
1.23776
1.81667
1.87684
2.18137
1.54306
2.10482
2.04435
1.62416
1.85509
1.58719
1.95166
1.78364
2.04451
1.61029
1.52196
1.62265
2.51155
1.75428
2.00947
2.20416
2.15836
1.92888
1.75905
1.86336
1.79345
1.92535
2.16398
2.03883
1.97572
1.60777
2.26774
1.96435
1.994
2.15588
2.39143
2.16603
1.90879
2.12071
2.2567
2.20259
2.12777
1.65661
2.58181
2.19795
2.19242
2.41241
2.09009
2.11556
1.81341
2.20056
2.21985
1.95286
2.6074
2.04702
2.53725
2.41333
2.30774
2.11219
2.38741
2.46199
2.48882
2.65966
2.36688
1.82605
2.46801
2.34482
2.67829
2.67814
2.40748
2.93963
2.09166
2.5336
2.42807
1.64255
2.32592
2.50276
3.49642
2.67627
2.66783
2.6338
3.56786
2.65119
2.62079
2.67284
3.90042
2.17066
3.0349
2.75552
3.10412
3.1488
2.55526
3.05718
2.80841
3.40502
3.3333
3.31686
3.71938
3.57145
3.01464
2.88751
4.91031
3.60853
3.49763
5.30222
3.28273
3.96172
3.09642
4.42315
3.56248
3.70041
3.99546
3.32151
4.32093
3.74474
4.067
3.98014
3.74008
4.91081
4.02394
4.52572
3.30173
4.97124
5.36746
6.52585
4.34812
5.10012
4.27143
4.72911
4.33703
5.10074
3.52127
5.41211
5.92337
5.40822
4.95576
5.219
4.62724
5.3562
6.37189
4.88096
6.43231
6.1784
5.85163
6.74377
6.31569
5.65292
7.41009
6.97101
6.59145
7.86533
7.11469
5.44041
6.65221
6.24802
6.88415
7.96995
7.20895
7.61181
8.12393
6.63157
6.86862
6.30541
8.14256
6.04082
8.14783
8.68939
8.51382
10.7358
8.17898
9.09555
11.106
11.0461
10.8591
10.7953
14.3048
14.2386
14.1677
12.9276
18.7444
18.266
1.6365
2.28415
1.42388
3.93832
2.97291
1.40977
1.31572
1.42545
2.53123
1.14672
2.23492
2.08433
1.33509
1.46127
1.49542
2.18976
1.70582
2.2398
1.29375
1.17891
1.50036
1.25704
2.29556
1.25269
1.40126
1.30393
1.41687
1.01839
1.89177
1.55956
1.95484
1.97652
1.53629
1.45083
1.98657
2.41291
1.42981
1.89066
2.01103
1.1388
1.16061
1.425
1.43906
1.0776
1.74101
1.7143
1.33838
1.48136
3.95424
1.68193
1.24517
1.19726
1.3621
2.91913
1.24304
1.80521
1.65123
1.17253
1.42934
2.13605
1.1014
1.38244
3.84864
2.93316
1.3185
1.02403
2.1291
1.42789
2.59251
0.967735
2.31511
2.1582
1.3915
1.49018
1.52839
1.75103
3.06026
1.53197
2.32794
1.12902
7.24289
4.06894
1.33657
2.10599
1.32639
1.6485
1.73459
1.56744
1.57524
1.60883
1.56516
1.24114
2.36928
2.77717
1.10142
11.4572
1.20624
1.16749
1.11024
1.07342
1.22795
2.84263
2.26664
1.78748
1.21312
13.6907
1.31269
1.85487
1.55119
1.9357
2.27247
1.18472
2.31963
1.69636
2.32925
2.34731
2.58015
1.21808
1.0178
1.6311
2.59986
1.22024
1.2502
2.04173
1.73123
1.47372
1.31402
2.19215
1.07923
1.22227
1.37579
1.76659
1.69755
1.50935
3.34806
1.56723
2.36989
1.37995
1.38927
1.53743
1.46852
1.30722
1.20369
2.23773
2.80075
1.07456
1.58323
2.1878
1.76873
2.75178
2.44823
1.17164
3.08272
1.57158
1.51525
3.39347
2.32007
1.70581
0.998852
1.48627
0.956118
1.1065
1.03309
1.80761
2.03497
1.99821
1.63617
1.1683
1.60145
1.54527
1.16557
1.53668
1.74278
2.44329
1.77217
1.99052
1.77865
1.75233
1.83685
1.72278
1.33222
1.85398
1.29087
1.16711
1.52549
1.29709
