# Supplementary material for: Integration host factor regulates colonization factors in the bee gut symbiont Frischella perrara
Source: eLife. 2023 Apr 14;12:e76182. doi: 10.7554/eLife.76182 (PMC10104596; doi:10.7554/eLife.76182)
Supplement: Figure 3—source data 1. [file elife-76182-fig3-data1.xlsx]

## Sheet: Figure 3C
Fp wt Day5	Fp wt Day10	Fp white Day5	Fp white Day10
1050000	16500000	18500	13000000
499	99000000	2550000	23600000
8000000	5650000	499	4450000
1650000	6250000	1180000	765000
499	24000000	499	960000
1550000	65000000	499	5400000
1400000	65000000	1110000	11000000
61500000	102000000	3650000	6050000
2200000	63000000	63000	17500000
163000000	350000000	499	1600000
72500	14950000	499	1950000
86000000	140000000	1950000	5100000
450000	58500000	499	3000
22000000	31000000	17500000	499
4250000	112000000	3600000	499
21500000	77000000	9500000	499
1500000	155000000	14700000	12000
16500000	230000000	2800000	499
	21000000		499
	145000000		320000
	115000000		499
	107000000		450000
	190000000		2000
	20600000		499
	68500000		1050000
	12000000		499
	39000000		499
	92000000		499
	20000000		92500
	31000000		240000
	25000000		95500000
	39000000		499
	52000000		21500000
	14500000		499
	87500000		499
	27500000		1250000

## Sheet: Figure 3D
Fp wt	Fp158	Day
499	499	0
499	499	0
499	499	0
499	499	0
499	499	0
499	499	0
499	499	0
499	499	0
499	499	0
499	499	0
499	499	0
499	499	0
499	499	1
4475	499	1
499	499	1
499	499	1
499	499	1
499	499	1
499	499	1
499	499	1
499	499	1
800	499	1
499	499	1
499	499	1
499	1050	2
499	499	2
499	499	2
499	499	2
499	499	2
499	499	2
499	2325	2
499	499	2
499	499	2
499	499	2
499	6000	2
499	499	2
499	499	4
499	499	4
499	1000	4
499	500	4
499	499	4
499	499	4
499	499	4
499	499	4
499	499	4
499	499	4
499	499	4
499	499	4
499	499	6
122500	1500	6
1000	45000	6
499	2225000	6
277500	1500	6
3500	499	6
152500	40250	6
165000	8000	6
11000	1000	6
8500	499	6
4000	499	6
499	499	6
107500	499	8
22000	499	8
499	499	8
8250	28500	8
1450000	499	8
2700000	499	8
1650000	3500	8
4150000	499	8
2400000	499	8
950000	5500	8
330000	9500	8
65000	5500	8
2425000	90000	10
1225000	233000	10
3030000	499	10
320000	140000	10
1650000	117500	10
153000	1275	10
3030000	499	10
320000	2400	10
3000000	499	10
1300000	80000	10
320000	499	10
1450000	230000	10
1900000	85000	14
5250000	185000	14
4450000	725000	14
1750000	282500	14
2900000	499	14
6500000	112500	14
6500000	6500	14
110000	1650000	14
1950000	36500	14
1280000	105000	14
2180000	20000	14
1100000	41500	14
18000000	14000	21
20250000	23250000	21
16000000	2800000	21
13000000	499	21
16000000	1425000	21
2000000	950000	21
3275000	47500	21
10000000	6000000	21
3150000	190000	21
2825000	34750	21
1725000	499	21
2975000	499	21

## Sheet: Fig3 - fig sup 1
CFU values							1450
F. perrara WT P	F. perrara White P	F. perrara WT I					10800
6980000	9750	3430000					109000
8000000	1500	2850000					530000
1900000	9250	3550000					31700
650000	38500	1500000					127000
1400000	293000	1300000					113000
2030000	31300	2380000					192
	67500						42100
qPCR values
F. perrara White I	F. perrara WT P	F. perrara White P	F. perrara WT I
143000	4270000	158000	7020000
1000	16900000	13200	5090000
2000	11900000	222000	7660000
60000	15700000	13000	17500000
90000	2230000	932000	724000
9750	5190000	31900	1080000
9500		2180000
	5930000	1180000	463000
	8630000	42.2	2180000
	18300000	10800	1290000
