# Supplementary material for: Integration host factor regulates colonization factors in the bee gut symbiont Frischella perrara
Source: eLife. 2023 Apr 14;12:e76182. doi: 10.7554/eLife.76182 (PMC10104596; doi:10.7554/eLife.76182)
Supplement: Figure 4—source data 1. [file elife-76182-fig4-data1.xlsx]

## Sheet: Sheet1
GeneID	COG category		logFC	Fold Change	logCPM	PValue	FDR	Start	End	Fp_specific_gene(Engel_et_al_AEM2015)	Gene.Product.Name	Function categories/Genomic_Island	Circos_plot_highlight(Fig3A)	COG
Fpe_01413	no_COG		7.88861	236.979	8.22183	2.97e-58	3.81e-56	1599273	1599632	Yes	nitrogen fixation protein NifU	Photorhabdus Island	fill_color=orange
Fpe_01745	U		7.85461	231.458	8.54323	1.45e-60	2.63e-58	1984971	1985393	Yes	type VI secretion system protein	T6SS	fill_color=dred	COG3518===Predicted component of the type VI protein secretion system
Fpe_01947	U		7.85024	230.759	12.9393	8.08e-61	1.6e-58	2222076	2222564	No	type VI secretion system secreted protein Hcp	T6SS	fill_color=dred	COG3157===Type VI protein secretion system component Hcp (secreted cytotoxin)
Fpe_01951	U		7.84596	230.076	10.4635	2.01e-63	8.76e-61	2226720	2228249	No	type VI secretion system protein ImpC	T6SS	fill_color=dred	COG3517===Predicted component of the type VI protein secretion system
Fpe_01952	U		7.83664	228.594	8.5986	6.59e-79	7.18e-76	2228360	2228863	No	type VI secretion system protein ImpB	T6SS	fill_color=dred	COG3516===Predicted component of the type VI protein secretion system
Fpe_01744	U		7.70287	208.35	11.4107	9.56e-47	6.12e-45	1983483	1984964	Yes	type VI secretion system protein ImpC	T6SS	fill_color=dred	COG3517===Predicted component of the type VI protein secretion system
Fpe_01412	H		7.68762	206.16	9.33987	1.32e-47	8.98e-46	1598058	1599260	Yes	long-chain-fatty-acid---luciferin-component ligase	Photorhabdus Island	fill_color=orange	COG1541===Phenylacetate-coenzyme A ligase PaaK adenylate-forming domain family
Fpe_01743	U		7.68136	205.267	10.3381	9.82e-50	8.22e-48	1982905	1983411	Yes	type VI secretion system protein ImpB	T6SS	fill_color=dred	COG3516===Predicted component of the type VI protein secretion system
Fpe_00578	I		7.62689	197.662	10.8958	1.13e-61	3.51e-59	640447	641310	Yes	3-hydroxybutyryl-CoA dehydrogenase	Colibactin	fill_color=green	COG1250===3-hydroxyacyl-CoA dehydrogenase
Fpe_01414	E		7.39598	168.428	9.68261	3.43e-44	2.14e-42	1599632	1600816	Yes	cysteine desulfurase	Photorhabdus Island	fill_color=orange	COG1104===Cysteine sulfinate desulfinase/cysteine desulfurase or related enzyme
Fpe_00582	Q		7.18112	145.122	11.9038	2.92e-61	7.07e-59	644031	648815	Yes	amino acid adenylation domain-containing protein	Colibactin	fill_color=green	COG1020===Non-ribosomal peptide synthetase component F
Fpe_01950	U		7.17363	144.37	8.83698	2.97e-63	1.08e-60	2225084	2226436	No	type VI secretion system protein ImpJ	T6SS	fill_color=dred	COG3522===Predicted component of the type VI protein secretion system
Fpe_00583	Q		7.12428	139.515	11.0127	2.2e-61	5.98e-59	648875	651907	Yes	Acyl transferase domain-containing protein	Colibactin	fill_color=green	COG3321===Acyl transferase domain in polyketide synthase (PKS) enzymes
Fpe_01746	U		7.11236	138.368	8.76154	4.32e-49	3.49e-47	1985434	1987152	Yes	type VI secretion system protein ImpG	T6SS	fill_color=dred	COG3519===Type VI protein secretion system component VasA
Fpe_00577	no_COG		7.06655	134.043	10.4075	2.91e-60	4.52e-58	637831	640434	Yes	Ketoacyl-synthetase C-terminal extension	Colibactin	fill_color=green
Fpe_01747	U		7.03927	131.532	7.60298	3.36e-56	3.66e-54	1987131	1988108	Yes	type VI secretion system protein ImpH	T6SS	fill_color=dred	COG3520===Predicted component of the type VI protein secretion system
Fpe_00585	Q		7.01788	129.596	11.3245	6.18e-58	7.08e-56	658482	664961	Yes	amino acid adenylation domain-containing protein	Colibactin	fill_color=green	COG1020===Non-ribosomal peptide synthetase component F
Fpe_01949	U		6.98202	126.415	8.80563	4.05e-55	4.01e-53	2224411	2225073	No	type VI secretion system protein ImpK	T6SS	fill_color=dred	COG3455===Type VI protein secretion system component VasF
Fpe_00586	J		6.91948	121.052	8.35847	8.19e-86	1.78e-82	664958	666424	Yes	amidase	Colibactin	fill_color=green	COG0154===Asp-tRNAAsn/Glu-tRNAGln amidotransferase A subunit or related amidase
Fpe_00581	I		6.88131	117.891	10.791	3.69e-59	5.35e-57	642743	643984	Yes	[acyl-carrier-protein] S-malonyltransferase	Colibactin	fill_color=green	COG0331===Malonyl CoA-acyl carrier protein transacylase
Fpe_01750	U		6.77961	109.866	8.72339	2.47e-47	1.63e-45	1989883	1991226	Yes	type VI secretion system protein ImpJ	T6SS	fill_color=dred	COG3522===Predicted component of the type VI protein secretion system
Fpe_01751	U		6.75623	108.1	7.15977	1.73e-54	1.63e-52	1991226	1991990	Yes	type VI secretion system protein ImpK	T6SS	fill_color=dred	COG3455===Type VI protein secretion system component VasF
Fpe_01416	IQ		6.66867	101.735	9.05576	9.69e-40	5.27e-38	1601105	1602361	Yes	3-oxoacyl-[acyl-carrier-protein] synthase II	Photorhabdus Island	fill_color=orange	COG0304===3-oxoacyl-(acyl-carrier-protein) synthase
Fpe_01948	M		6.55949	94.3199	8.63028	1.34e-58	1.82e-56	2222614	2224389	No	Outer membrane protein OmpA	T6SS	fill_color=dred	COG2885===Outer membrane protein OmpA and related peptidoglycan-associated (lipo)proteins
Fpe_00584	Q		6.55765	94.1998	11.4902	5.12e-53	4.46e-51	651968	658471	Yes	amino acid adenylation domain-containing protein	Colibactin	fill_color=green	COG1020===Non-ribosomal peptide synthetase component F
Fpe_01749	U		6.53635	92.8194	7.07196	7.8e-49	6.07e-47	1989346	1989870	Yes	type VI secretion system protein VasD	T6SS	fill_color=dred	COG3521===Predicted component of the type VI protein secretion system
Fpe_00588	Q		6.52238	91.925	9.62494	4.41e-58	5.34e-56	667930	672342	Yes	amino acid adenylation domain-containing protein	Colibactin	fill_color=green	COG1020===Non-ribosomal peptide synthetase component F
Fpe_00587	V		6.51239	91.2903	8.89027	3.34e-68	2.42e-65	666494	667933	Yes	putative efflux protein MATE family	Colibactin	fill_color=green	COG0534===Na+-driven multidrug efflux pump
Fpe_00580	I		6.46814	88.5326	10.8633	1.48e-55	1.53e-53	641607	642743	Yes	Acyl-CoA dehydrogenase	Colibactin	fill_color=green	COG1960===Acyl-CoA dehydrogenase related to the alkylation response protein AidB
Fpe_01752	no_COG		6.37208	82.8299	9.16277	4.09e-40	2.28e-38	1992004	1994697	Yes	type VI secretion system protein VasG	T6SS	fill_color=dred
Fpe_01748	TU		6.22091	74.5901	7.91918	2.01e-48	1.51e-46	1988111	1989346	Yes	type VI secretion system protein ImpI	T6SS	fill_color=dred	COG3456===Predicted component of the type VI protein secretion system contains a FHA domain
Fpe_00589	no_COG		6.17053	72.0304	9.04	4.6e-61	1e-58	672373	674832	Yes	Phosphopantetheine attachment site	Colibactin	fill_color=green
Fpe_01946	O		5.84067	57.3084	8.98231	1.89e-39	9.81e-38	2219002	2221791	No	type VI secretion system protein VasG	T6SS	fill_color=dred	COG0542===ATP-dependent Clp protease ATP-binding subunit ClpA
Fpe_00550	no_COG		5.81358	56.2421	11.1533	7.19e-23	1.51e-21	582688	584823	Yes	hypothetical protein	Fp-specific Island 2	fill_color=chr23
Fpe_00574	no_COG		5.71808	52.6396	8.7445	1.18e-36	5.02e-35	623831	624703	Yes	hypothetical protein	Fp-specific Island 2	fill_color=chr23
Fpe_01742	U		5.71065	52.3695	11.0175	6.24e-31	2.05e-29	1981961	1982473	Yes	type VI secretion system secreted protein Hcp	T6SS	fill_color=dred	COG3157===Type VI protein secretion system component Hcp (secreted cytotoxin)
Fpe_00573	no_COG		5.65096	50.2467	10.7339	1.42e-37	6.32e-36	621965	623722	Yes	hypothetical protein	Fp-specific Island 2	fill_color=chr23
Fpe_01456	no_COG		5.59545	48.3501	6.65737	4.89e-20	8.31e-19	1653071	1653937	Yes	hypothetical protein		fill_color=chr23
Fpe_01754	no_COG		5.55079	46.8762	7.1296	3.72e-43	2.19e-41	1995390	1996769	Yes	type VI secretion system protein VasJ	T6SS	fill_color=dred
Fpe_01753	no_COG		5.44271	43.4931	6.6235	3.11e-39	1.57e-37	1994700	1995383	Yes	type VI secretion system protein VasI	T6SS	fill_color=dred
Fpe_00590	V		5.39689	42.1333	8.88588	7.63e-54	6.92e-52	674853	676334	Yes	CubicO group peptidase beta-lactamase class C family	Colibactin	fill_color=green	COG1680===CubicO group peptidase beta-lactamase class C family
Fpe_01808	I		5.29256	39.1939	9.78986	5.57e-16	6.34e-15	2064099	2064983	Yes	triacylglycerol lipase	Metabolism(Decarboxylase/lyases etc.)	fill_color=chr23	COG1075===Triacylglycerol esterase/lipase EstA alpha/beta hydrolase fold
Fpe_01455	no_COG		5.10886	34.508	8.74147	5.61e-19	9.11e-18	1649270	1653037	Yes	hypothetical protein		fill_color=chr23
Fpe_00445	P		5.06693	33.5196	6.8454	1.86e-60	3.12e-58	463572	464399	No	phosphoribosyl 1 2-cyclic phosphate phosphodiesterase		fill_color=chr23	COG1235===Phosphoribosyl 1 2-cyclic phosphodiesterase
Fpe_00576	Q		4.9709	31.361	12.8121	5.21e-35	2.14e-33	628195	637782	Yes	amino acid adenylation domain-containing protein	Colibactin	fill_color=green	COG3321===Acyl transferase domain in polyketide synthase (PKS) enzymes
Fpe_01739	S		4.93251	30.5375	6.07479	8.29e-24	1.8e-22	1978710	1979153	Yes	hypothetical protein	T6SS	fill_color=dred	COG5435===Uncharacterized protein
Fpe_00600	no_COG		4.83758	28.5928	8.64677	2.82e-34	1.12e-32	685956	687797	Yes	hypothetical protein		fill_color=chr23
Fpe_00575	UXR		4.83164	28.4753	10.3482	3.07e-28	8.91e-27	624715	627279	No	type VI secretion system secreted protein VgrG	Fp-specific Island 2	fill_color=chr23	COG3501===Uncharacterized conserved protein implicated in type VI secretion and phage assembly
Fpe_00599	no_COG		4.79896	27.8376	6.0718	3.26e-48	2.36e-46	684919	685881	Yes	hypothetical protein		fill_color=chr23
Fpe_00572	no_COG		4.79245	27.7122	8.09953	8.12e-39	3.93e-37	620932	621786	Yes	hypothetical protein	Fp-specific Island 2	fill_color=chr23
Fpe_01411	no_COG		4.7901	27.6672	9.08494	4.77e-28	1.35e-26	1596709	1597776	Yes	putative flavoprotein involved in K+ transport	Photorhabdus Island	fill_color=orange
Fpe_00571	no_COG		4.74996	26.908	7.22467	5.76e-48	4.05e-46	619052	620887	Yes	hypothetical protein	Fp-specific Island 2	fill_color=chr23
Fpe_01756	no_COG		4.7368	26.6636	6.62699	2.12e-33	7.95e-32	2000296	2001618	Yes	type VI secretion system protein VasL	T6SS	fill_color=dred
Fpe_00663	no_COG		4.67747	25.5893	7.02301	1.77e-20	3.19e-19	751638	752765	Yes	AAA domain-containing protein	Genomic Island 4	fill_color=chr23
Fpe_01417	no_COG		4.65813	25.2485	7.60305	1.95e-31	6.63e-30	1602361	1603161	Yes	Acyl dehydratase	Photorhabdus Island	fill_color=orange
Fpe_01755	U		4.60148	24.2763	8.37702	1.45e-30	4.45e-29	1996773	2000249	Yes	type VI secretion system protein ImpL	T6SS	fill_color=dred	COG3523===Type VI protein secretion system component VasK
Fpe_01809	I		4.59549	24.1757	9.28986	1.21e-14	1.22e-13	2066046	2066930	Yes	Triacylglycerol esterase/lipase EstA alpha/beta hydrolase fold	Metabolism(Decarboxylase/lyases etc.)	fill_color=chr23	COG1075===Triacylglycerol esterase/lipase EstA alpha/beta hydrolase fold
Fpe_01783	UXR		4.52771	23.0662	8.72705	2.51e-27	6.83e-26	2033584	2035617	Yes	type VI secretion system secreted protein VgrG	T6SS	fill_color=dred	COG3501===Uncharacterized conserved protein implicated in type VI secretion and phage assembly
Fpe_00601	no_COG		4.4731	22.2094	8.00824	2.2e-32	7.97e-31	687834	688715	Yes	hypothetical protein		fill_color=chr23
Fpe_00597	no_COG		4.46274	22.0505	5.38107	3.37e-40	1.93e-38	682068	682973	Yes	hypothetical protein		fill_color=chr23
Fpe_01429	Q		4.43897	21.6901	11.2702	4.41e-24	9.89e-23	1612633	1618137	Yes	Ca2+-binding protein RTX toxin-related	T1SS	fill_color=chr23	COG2931===Ca2+-binding protein RTX toxin-related
Fpe_01784	no_COG		4.4309	21.5692	6.91572	1.14e-30	3.6e-29	2035614	2036192	Yes	protein of unknown function (DUF4123)		fill_color=chr23
Fpe_01418	IQR		4.42876	21.5373	8.47109	1.41e-24	3.33e-23	1603183	1603920	Yes	3-oxoacyl-[acyl-carrier protein] reductase	Photorhabdus Island	fill_color=orange	COG1028===NAD(P)-dependent dehydrogenase short-chain alcohol dehydrogenase family
Fpe_00911	P		4.37444	20.7414	7.55539	3.96e-26	9.92e-25	1026565	1028868	No	hemoglobin/transferrin/lactoferrin receptor protein	Transferrin	fill_color=chr23	COG1629===Outer membrane receptor proteins mostly Fe transport
Fpe_01872	no_COG		4.3238	20.0259	8.00741	5.03e-18	7.4e-17	2138084	2139262	Yes	hypothetical protein		fill_color=chr23
Fpe_00915	no_COG		4.28177	19.451	5.51443	3.46e-29	1.03e-27	1032154	1032792	No	NAD(P)H-binding		fill_color=chr23
Fpe_00598	no_COG		4.22663	18.7216	6.47643	3.93e-38	1.82e-36	683052	684896	Yes	hypothetical protein		fill_color=chr23
Fpe_01643	UXR		4.20071	18.3883	8.23969	8.64e-27	2.19e-25	1857516	1860032	No	type VI secretion system secreted protein VgrG	T6SS	fill_color=dred	COG3501===Uncharacterized conserved protein implicated in type VI secretion and phage assembly
Fpe_01871	no_COG		4.12609	17.4613	6.61644	1.79e-17	2.43e-16	2137315	2138100	Yes	Uncharacterized conserved protein (DUF2163)		fill_color=chr23
Fpe_01785	no_COG		4.12554	17.4546	7.95395	6.3e-31	2.05e-29	2036216	2037466	Yes	hypothetical protein		fill_color=chr23
Fpe_01038	no_COG		4.07601	16.8656	6.85484	1.29e-38	6.08e-37	1179922	1181466	Yes	hypothetical protein		fill_color=chr23
Fpe_00432	P		4.0219	16.2447	9.52997	1.77e-24	4.09e-23	448462	448665	No	copper chaperone		fill_color=chr23	COG2608===Copper chaperone CopZ
Fpe_00664	no_COG		3.96478	15.6141	5.95997	2.33e-15	2.52e-14	752815	753642	Yes	Putative Phosphatase	Genomic Island 4	fill_color=chr23
Fpe_00914	P		3.94266	15.3765	5.83417	1.5e-21	2.98e-20	1031624	1032133	No	hypothetical protein		fill_color=chr23	COG3721===Putative heme iron utilization protein
Fpe_01786	no_COG		3.9268	15.2084	7.75375	8.36e-29	2.46e-27	2037496	2038374	Yes	hypothetical protein		fill_color=chr23
Fpe_01037	UXR		3.90902	15.0221	8.62675	3.76e-33	1.39e-31	1177226	1179922	No	type VI secretion system secreted protein VgrG	T6SS	fill_color=dred	COG3501===Uncharacterized conserved protein implicated in type VI secretion and phage assembly
Fpe_01866	no_COG		3.87318	14.6536	7.84194	1.75e-15	1.91e-14	2130677	2131555	Yes	hypothetical protein		fill_color=chr23
Fpe_01870	no_COG		3.82679	14.1899	5.60865	1.21e-14	1.22e-13	2137081	2137302	Yes	hypothetical protein		fill_color=chr23
Fpe_00569	no_COG		3.8145	14.0695	6.26445	8.02e-39	3.93e-37	615060	616895	Yes	hypothetical protein	Fp-specific Island 2	fill_color=chr23
Fpe_00570	no_COG		3.77948	13.7321	7.74411	4.26e-38	1.93e-36	617059	618888	Yes	hypothetical protein	Fp-specific Island 2	fill_color=chr23
Fpe_01526	M		3.76751	13.6186	11.1759	3.44e-17	4.53e-16	1729694	1730704	Yes	Fructoselysine-6-P-deglycase FrlB with duplicated sugar isomerase (SIS) domain	Metabolism(Decarboxylase/lyases etc.)	fill_color=chr23	COG2222===Fructoselysine-6-P-deglycase FrlB and related proteins with duplicated sugar isomerase (SIS) domain
Fpe_01023	UXR		3.76698	13.6137	8.99792	9.1e-23	1.89e-21	1153328	1155718	No	type VI secretion system secreted protein VgrG	T6SS	fill_color=dred	COG3501===Uncharacterized conserved protein implicated in type VI secretion and phage assembly
Fpe_01869	no_COG		3.75148	13.4682	9.11795	1.96e-13	1.73e-12	2134077	2136878	Yes	von Willebrand factor type A domain-containing protein		fill_color=chr23
Fpe_01645	no_COG		3.6922	12.926	7.30691	1.5e-39	7.98e-38	1861282	1862121	Yes	hypothetical protein		fill_color=chr23
Fpe_01945	UXR		3.67886	12.807	8.54484	4.72e-23	9.97e-22	2216371	2218911	No	type VI secretion system secreted protein VgrG	T6SS	fill_color=dred	COG3501===Uncharacterized conserved protein implicated in type VI secretion and phage assembly
Fpe_00678	no_COG		3.66924	12.7218	7.36331	1.95e-13	1.72e-12	766159	766926	Yes	hypothetical protein	Genomic Island 4	fill_color=chr23
Fpe_01419	V		3.66605	12.6938	8.50006	5.94e-20	9.95e-19	1603990	1605165	No	membrane fusion protein multidrug efflux system	Transport (Sugar AA Ions etc.)	fill_color=chr23	COG1566===Multidrug resistance efflux pump
Fpe_00916	P		3.666	12.6933	4.82999	2.65e-24	6e-23	1032842	1033828	No	iron complex transport system permease protein	Transport (Sugar AA Ions etc.)	fill_color=chr23	COG0609===ABC-type Fe3+-siderophore transport system permease component
Fpe_00677	no_COG		3.66308	12.6677	4.39017	5.26e-14	4.88e-13	764975	765322	Yes	Protein of unknown function (DUF2570)	Genomic Island 4	fill_color=chr23
Fpe_00676	M		3.66213	12.6593	6.58383	2.03e-14	1.99e-13	764557	764982	Yes	lysozyme	Genomic Island 4	fill_color=chr23	COG3772===Phage-related lysozyme (muramidase) GH24 family
Fpe_01740	UXR		3.65743	12.6182	6.73919	5.53e-17	7.08e-16	1979484	1981412	Yes	type VI secretion system secreted protein VgrG	T6SS	fill_color=dred	COG3501===Uncharacterized conserved protein implicated in type VI secretion and phage assembly
Fpe_01873	no_COG		3.65273	12.5771	3.72298	1.94e-12	1.56e-11	2139922	2140053	Yes	hypothetical protein		fill_color=chr23
Fpe_01028	UXR		3.6289	12.3711	7.09491	5.95e-35	2.4e-33	1162809	1165397	No	type VI secretion system secreted protein VgrG	T6SS	fill_color=dred	COG3501===Uncharacterized conserved protein implicated in type VI secretion and phage assembly
Fpe_01024	no_COG		3.59028	12.0443	5.18416	3.68e-25	8.8e-24	1155722	1156684	No	protein of unknown function (DUF4123)		fill_color=chr23
Fpe_01431	V		3.58789	12.0243	6.20244	2.02e-37	8.79e-36	1620363	1621691	Yes	hemolysin D	T1SS	fill_color=chr23	COG1566===Multidrug resistance efflux pump
Fpe_01601	T		3.56106	11.8028	7.48919	6.07e-24	1.33e-22	1810111	1813143	No	TPR repeat		fill_color=chr23	COG0790===TPR repeat
Fpe_00591	Q		3.52481	11.51	8.24093	3.61e-34	1.4e-32	676334	677056	Yes	Surfactin synthase thioesterase subunit	Colibactin	fill_color=green	COG3208===Surfactin synthase thioesterase subunit
Fpe_01634	no_COG		3.51195	11.4078	5.52938	1.17e-29	3.55e-28	1846622	1847137	Yes	protein of unknown function (DUF4123)		fill_color=chr23
Fpe_01635	UXR		3.48263	11.1783	8.15249	5.96e-27	1.56e-25	1847137	1849560	No	type VI secretion system secreted protein VgrG	T6SS	fill_color=dred	COG3501===Uncharacterized conserved protein implicated in type VI secretion and phage assembly
Fpe_01457	no_COG		3.47966	11.1553	6.71477	1.27e-11	9.43e-11	1654191	1656215	Yes	hypothetical protein		fill_color=chr23
Fpe_00675	no_COG		3.46968	11.0784	5.37446	1.04e-11	7.86e-11	764232	764543	Yes	LydA holin phage holin superfamily III	Genomic Island 4	fill_color=chr23
Fpe_00431	P		3.46344	11.0306	10.4975	3.2e-21	6.17e-20	446098	448347	No	Cd2+/Zn2+-exporting ATPase	Transport (Sugar AA Ions etc.)	fill_color=chr23	COG2217===Cation transport ATPase
Fpe_01029	no_COG		3.46265	11.0246	4.44115	3.48e-28	9.96e-27	1165409	1166983	No	VRR-NUC domain-containing protein		fill_color=chr23
Fpe_01430	V		3.45666	10.9789	7.74994	1e-31	3.52e-30	1618255	1620363	Yes	ATP-binding cassette subfamily B HlyB/CyaB	T1SS	fill_color=chr23	COG2274===ABC-type bacteriocin/lantibiotic exporters contain an N-terminal double-glycine peptidase domain
Fpe_01915	no_COG		3.43574	10.8208	8.38551	1.28e-27	3.53e-26	2182308	2182709	No	hypothetical protein		fill_color=chr23
Fpe_01646	UXR		3.43312	10.8012	6.58146	1.1e-31	3.8e-30	1862093	1864660	No	type VI secretion system secreted protein VgrG	T6SS	fill_color=dred	COG3501===Uncharacterized conserved protein implicated in type VI secretion and phage assembly
Fpe_02203	no_COG		3.43146	10.7887	6.69852	3.37e-10	2.19e-09	2525203	2526756	Yes	AAA domain-containing protein putative AbiEii toxin Type IV TA system		fill_color=chr23
Fpe_00665	V		3.42405	10.7335	5.76513	2.78e-17	3.69e-16	753908	754594	Yes	putative restriction endonuclease	Genomic Island 4	fill_color=chr23	COG3440===Predicted restriction endonuclease
Fpe_01328	UW		3.3977	10.5392	9.35866	2.01e-17	2.7e-16	1505938	1506162	No	pilus assembly protein Flp/PilA	Flp pili	fill_color=chr3	COG3847===Flp pilus assembly protein pilin Flp
Fpe_01031	no_COG		3.35693	10.2456	3.45011	8.44e-27	2.16e-25	1168292	1168429	Yes	hypothetical protein		fill_color=chr23
Fpe_01868	no_COG		3.35004	10.1968	6.83943	7.52e-14	6.91e-13	2133196	2134074	Yes	hypothetical protein		fill_color=chr23
Fpe_01030	no_COG		3.23788	9.43409	6.45781	1.43e-30	4.44e-29	1167020	1168273	No	Protein of unknown function (DUF3396)		fill_color=chr23
Fpe_01922	I		3.2121	9.26701	7.01293	9.29e-31	2.97e-29	2186807	2188492	No	Acyl-coenzyme A synthetase/AMP-(fatty) acid ligase	Arylpolyene	fill_color=blue	COG0365===Acyl-coenzyme A synthetase/AMP-(fatty) acid ligase
Fpe_01867	no_COG		3.19034	9.12828	8.54727	1.64e-11	1.2e-10	2131920	2132801	Yes	hypothetical protein		fill_color=chr23
Fpe_01521	G		3.18445	9.09104	7.72857	7.52e-11	5.14e-10	1726059	1726481	Yes	PTS system mannose-specific IIA component		fill_color=chr23	COG2893===Phosphotransferase system mannose/fructose-specific component IIA
Fpe_00928	M		3.14664	8.85588	5.40955	7.24e-13	6.06e-12	1049402	1050790	Yes	outer membrane protein adhesin transport system	Genomic Island 5	fill_color=chr23	COG1538===Outer membrane protein TolC
Fpe_02153	no_COG		3.14537	8.84814	9.26187	2.08e-11	1.5e-10	2469451	2470338	Yes	hypothetical protein		fill_color=chr23
Fpe_01523	G		3.14422	8.84105	8.29328	2.9e-14	2.78e-13	1726987	1727760	Yes	PTS system mannose-specific IIC component		fill_color=chr23	COG3715===Phosphotransferase system mannose/fructose/N-acetylgalactosamine-specific component IIC
Fpe_01921	S		3.13783	8.802	4.79499	6.71e-27	1.74e-25	2186244	2186807	No	Uncharacterized membrane protein	Arylpolyene	fill_color=blue	COG4648===Uncharacterized membrane protein
Fpe_02196	I		3.13099	8.76034	4.66207	1.32e-25	3.2e-24	2517057	2518163	Yes	Sterol desaturase/sphingolipid hydroxylase fatty acid hydroxylase superfamily	Metabolism(Decarboxylase/lyases etc.)	fill_color=chr23	COG3000===Sterol desaturase/sphingolipid hydroxylase fatty acid hydroxylase superfamily
Fpe_01642	no_COG		3.1305	8.75736	7.09496	1.64e-20	2.98e-19	1856550	1857500	No	hypothetical protein		fill_color=chr23
Fpe_01738	R		3.1185	8.68486	9.46174	1.19e-12	9.75e-12	1973870	1978690	Yes	RHS repeat-associated core domain-containing protein	T6SS	fill_color=dred	COG3209===Uncharacterized conserved protein RhaS contains 28 RHS repeats
Fpe_01522	G		3.1027	8.59025	9.18393	2.74e-12	2.19e-11	1726496	1726975	No	PTS system mannose-specific IIB component		fill_color=chr23	COG3444===Phosphotransferase system mannose/fructose/N-acetylgalactosamine-specific component IIB
Fpe_00558	S		3.10074	8.57858	4.67163	1.96e-11	1.43e-10	598247	598690	Yes	hypothetical protein	Fp-specific Island 2	fill_color=chr23	COG5435===Uncharacterized protein
Fpe_00912	P		3.07341	8.41758	5.76245	1.63e-13	1.45e-12	1029038	1029889	No	iron complex transport system substrate-binding protein	Transport (Sugar AA Ions etc.)	fill_color=chr23	COG4558===ABC-type hemin transport system periplasmic component
Fpe_01633	no_COG		3.07046	8.40043	6.27299	7.75e-26	1.9e-24	1846281	1846622	Yes	hypothetical protein		fill_color=chr23
Fpe_00444	G		3.07041	8.40012	7.44901	2.95e-27	7.93e-26	462323	463555	No	nucleoside transporter	Transport (Sugar AA Ions etc.)	fill_color=chr23	COG2211===Na+/melibiose symporter or related transporter
Fpe_01758	U		3.04874	8.27488	6.62872	1.64e-14	1.62e-13	2002747	2004498	Yes	type VI secretion system protein ImpG	T6SS	fill_color=dred	COG3519===Type VI protein secretion system component VasA
Fpe_01595	no_COG		3.03234	8.18134	4.83147	8.51e-19	1.37e-17	1802743	1802958	No	protein of unknown function (DUF4177)		fill_color=chr23
Fpe_02318	UXR		3.02262	8.12641	8.54023	1.42e-20	2.61e-19	2666615	2668975	No	type VI secretion system secreted protein VgrG	T6SS	fill_color=dred	COG3501===Uncharacterized conserved protein implicated in type VI secretion and phage assembly
Fpe_01420	no_COG		3.01342	8.07474	7.27018	1.37e-18	2.15e-17	1605162	1606703	No	MFS transporter DHA2 family multidrug resistance protein		fill_color=chr23
Fpe_01916	no_COG		2.98129	7.89691	8.45443	4.28e-17	5.58e-16	2182752	2183834	No	Predicted O-methyltransferase		fill_color=chr23
Fpe_00241	P		2.97426	7.85855	9.79386	2.99e-11	2.14e-10	242246	244225	No	outer membrane receptor for ferrienterochelin and colicins		fill_color=chr23	COG4771===Outer membrane receptor for ferrienterochelin and colicins
Fpe_01524	G		2.96603	7.81385	8.76311	1.19e-11	8.91e-11	1727738	1728568	No	PTS system mannose-specific IID component		fill_color=chr23	COG3716===Phosphotransferase system mannose/fructose/N-acetylgalactosamine-specific component IID
Fpe_01629	UXR		2.95736	7.76704	7.02364	6.09e-26	1.51e-24	1840316	1842709	No	type VI secretion system secreted protein VgrG	T6SS	fill_color=dred	COG3501===Uncharacterized conserved protein implicated in type VI secretion and phage assembly
Fpe_01032	no_COG		2.95534	7.75615	5.7539	3.63e-27	9.62e-26	1168543	1170117	No	hypothetical protein		fill_color=chr23
Fpe_00913	H		2.94005	7.6744	7.30266	1.14e-13	1.02e-12	1030188	1031612	No	coproporphyrinogen III oxidase anaerobic (EC 1.3.99.22)		fill_color=chr23	COG0635===Coproporphyrinogen III oxidase or related Fe-S oxidoreductase
Fpe_02287	E		2.9395	7.67144	7.36505	3.43e-09	1.97e-08	2620630	2622900	No	methionine synthase (B12-independent)	Metabolism(Decarboxylase/lyases etc.)	fill_color=chr23	COG0620===Methionine synthase II (cobalamin-independent)
Fpe_02317	no_COG		2.92366	7.58769	4.83333	2.48e-24	5.68e-23	2665665	2666615	No	protein of unknown function (DUF4123)		fill_color=chr23
Fpe_00611	no_COG		2.92028	7.56992	3.44649	3.77e-07	1.71e-06	696161	696910	Yes	A-factor biosynthesis hotdog domain-containing protein		fill_color=chr23
Fpe_01525	no_COG		2.90389	7.4844	9.04166	2.95e-12	2.35e-11	1728579	1729670	Yes	Glucosamine 6-phosphate synthetase contains amidotransferase and phosphosugar isomerase domains	Metabolism(Decarboxylase/lyases etc.)	fill_color=chr23
Fpe_00909	O		2.89661	7.44676	8.27815	9.78e-21	1.81e-19	1022685	1023698	No	Membrane protease subunit stomatin/prohibitin family contains C-terminal Zn-ribbon domain		fill_color=chr23	COG4260===Membrane protease subunit stomatin/prohibitin family contains C-terminal Zn-ribbon domain
Fpe_00835	no_COG		2.86543	7.28751	8.30244	3.98e-15	4.22e-14	931068	932438	Yes	hypothetical protein		fill_color=chr23
Fpe_02192	M		2.86343	7.27745	5.61773	1.12e-17	1.57e-16	2513336	2514343	Yes	Nucleoside-diphosphate-sugar epimerase		fill_color=chr23	COG0451===Nucleoside-diphosphate-sugar epimerase
Fpe_00549	no_COG		2.85712	7.24566	7.08574	2.22e-08	1.18e-07	580311	582431	Yes	hypothetical protein	Fp-specific Island 2	fill_color=chr23
Fpe_01299	P		2.84863	7.20316	6.79807	6.03e-20	1e-18	1474520	1475485	No	iron complex transport system permease protein	Transport (Sugar AA Ions etc.)	fill_color=chr23	COG4606===ABC-type enterochelin transport system permease component
Fpe_01936	U		2.83682	7.14444	8.65518	2.55e-21	5.01e-20	2201898	2203661	No	type VI secretion system protein ImpG	T6SS	fill_color=dred	COG3519===Type VI protein secretion system component VasA
Fpe_00705	E		2.78789	6.90617	7.93669	1.77e-17	2.41e-16	795247	796425	Yes	Methionine synthase II (cobalamin-independent)	Metabolism(Decarboxylase/lyases etc.)	fill_color=chr23	COG0620===Methionine synthase II (cobalamin-independent)
Fpe_02193	no_COG		2.76914	6.81699	4.97132	4.07e-18	6.16e-17	2514345	2515151	Yes	Zn-dependent hydrolases including glyoxylases		fill_color=chr23
Fpe_00612	no_COG		2.74923	6.72358	3.59937	3.12e-06	1.24e-05	696945	697565	Yes	hypothetical protein		fill_color=chr23
Fpe_01934	U		2.74712	6.71376	6.359	1.63e-24	3.82e-23	2200379	2200894	No	type VI secretion system protein VasD	T6SS	fill_color=dred	COG3521===Predicted component of the type VI protein secretion system
Fpe_01018	UXR		2.7149	6.56548	8.54969	3.41e-20	5.85e-19	1145609	1148131	No	type VI secretion system secreted protein VgrG	T6SS	fill_color=dred	COG3501===Uncharacterized conserved protein implicated in type VI secretion and phage assembly
Fpe_01339	no_COG		2.71351	6.55917	8.09346	2.16e-22	4.44e-21	1516143	1518080	Yes	tight adherence protein G	Flp pili	fill_color=chr23
Fpe_00668	no_COG		2.6865	6.43748	7.35729	2.98e-21	5.8e-20	757343	757624	Yes	hypothetical protein		fill_color=chr23
Fpe_02194	H		2.67862	6.40244	5.80443	4.7e-16	5.44e-15	2515148	2516437	Yes	putative adenylate-forming enzyme		fill_color=chr23	COG1541===Phenylacetate-coenzyme A ligase PaaK adenylate-forming domain family
Fpe_01935	U		2.67644	6.39276	7.64396	9.04e-24	1.95e-22	2200915	2201934	No	type VI secretion system protein ImpH	T6SS	fill_color=dred	COG3520===Predicted component of the type VI protein secretion system
Fpe_02195	no_COG		2.67571	6.38952	3.2524	8.72e-17	1.08e-15	2516434	2517042	Yes	hypothetical protein		fill_color=chr23
Fpe_01338	no_COG		2.64555	6.25734	6.0467	4.5e-22	8.99e-21	1515316	1516116	Yes	Putative tight adherence pilin protein F	Flp pili	fill_color=chr23
Fpe_01340	no_COG		2.62755	6.17975	5.97699	4.6e-21	8.71e-20	1518095	1519447	Yes	Regulator of chromosome condensation (RCC1) repeat-containing protein		fill_color=chr23
Fpe_01757	no_COG		2.62637	6.17471	6.54483	9.27e-11	6.3e-10	2001662	2002435	Yes	hypothetical protein	T6SS	fill_color=dred
Fpe_01933	U		2.62296	6.16011	5.34148	3.97e-22	7.99e-21	2199953	2200375	No	type VI secretion system protein	T6SS	fill_color=dred	COG3518===Predicted component of the type VI protein secretion system
Fpe_00927	no_COG		2.61669	6.13341	8.60867	3.91e-09	2.24e-08	1044717	1049315	Yes	Ig-like domain (group 3)	Genomic Island 5	fill_color=chr23
Fpe_01025	no_COG		2.59386	6.03712	8.69624	2.05e-17	2.74e-16	1156671	1160063	No	hypothetical protein		fill_color=chr23
Fpe_01632	no_COG		2.58853	6.01487	7.39165	2.65e-23	5.66e-22	1845162	1846271	Yes	Restriction endonuclease fold toxin 5		fill_color=chr23
Fpe_02202	no_COG		2.58254	5.98995	5.87499	1.03e-07	5.06e-07	2524046	2525200	Yes	hypothetical protein		fill_color=chr23
Fpe_00568	no_COG		2.58	5.9794	4.00506	9.66e-21	1.8e-19	612900	614738	Yes	hypothetical protein	Fp-specific Island 2	fill_color=chr23
Fpe_01918	I		2.57819	5.97191	4.73557	9.63e-19	1.54e-17	2184881	2185657	No	1-acyl-sn-glycerol-3-phosphate acyltransferases	Arylpolyene	fill_color=blue	COG0204===1-acyl-sn-glycerol-3-phosphate acyltransferase
Fpe_02168	no_COG		2.57451	5.95668	6.46568	1.86e-20	3.31e-19	2487422	2488384	Yes	Putative PD-(D/E)XK family member (DUF4420)		fill_color=chr23
Fpe_02286	E		2.56146	5.90303	7.10957	1.06e-07	5.15e-07	2619731	2620627	No	5 10-methylenetetrahydrofolate reductase (NAD(P))		fill_color=chr23	COG0685===5 10-methylenetetrahydrofolate reductase
Fpe_01034	no_COG		2.55255	5.8667	4.76736	2.08e-20	3.69e-19	1171521	1173095	No	VRR-NUC domain-containing protein		fill_color=chr23
Fpe_02331	S		2.55132	5.86172	7.63648	1.75e-18	2.71e-17	2685602	2685997	Yes	Uncharacterized membrane protein YhaH DUF805 family		fill_color=chr23	COG3152===Uncharacterized membrane protein YhaH DUF805 family
Fpe_00348	S		2.49212	5.62605	6.89398	6.1e-18	8.73e-17	364181	365212	Yes	Uncharacterized conserved protein YegL contains vWA domain of TerY type		fill_color=chr23	COG4245===Uncharacterized conserved protein YegL contains vWA domain of TerY type
Fpe_00349	S		2.48042	5.58062	7.15118	7.34e-17	9.19e-16	365227	365865	Yes	Uncharacterized conserved protein YegL contains vWA domain of TerY type		fill_color=chr23	COG4245===Uncharacterized conserved protein YegL contains vWA domain of TerY type
Fpe_00596	no_COG		2.4621	5.51017	6.32023	5.06e-18	7.4e-17	681088	682056	Yes	hypothetical protein		fill_color=chr23
Fpe_02198	no_COG		2.44754	5.45486	3.75746	3.66e-16	4.3e-15	2519283	2520371	Yes	linoleoyl-CoA desaturase		fill_color=chr23
Fpe_01330	UW		2.44194	5.43373	10.3657	3.52e-12	2.78e-11	1506866	1508170	No	pilus assembly protein CpaF	Flp pili	fill_color=chr3	COG4962===Pilus assembly protein ATPase of CpaF family
Fpe_02164	no_COG		2.4389	5.42228	5.76668	1.37e-14	1.37e-13	2482793	2483044	Yes	hypothetical protein		fill_color=chr23
Fpe_01033	no_COG		2.4315	5.39455	7.03674	2.31e-20	4.02e-19	1170154	1171407	No	Protein of unknown function (DUF3396)		fill_color=chr23
Fpe_00910	P		2.42615	5.37457	6.12645	2e-15	2.17e-14	1024374	1026506	No	hemoglobin/transferrin/lactoferrin receptor protein	Transferrin	fill_color=chr23	COG4771===Outer membrane receptor for ferrienterochelin and colicins
Fpe_00610	no_COG		2.42316	5.36344	3.51915	7.3e-07	3.17e-06	695316	696146	Yes	hypothetical protein		fill_color=chr23
Fpe_02316	no_COG		2.42288	5.36239	6.84848	5.89e-20	9.93e-19	2661242	2665552	Yes	hypothetical protein		fill_color=chr23
Fpe_01924	I		2.41403	5.3296	3.27921	3.05e-15	3.27e-14	2190230	2190652	No	acyl-CoA thioester hydrolase	Arylpolyene	fill_color=blue	COG0824===Acyl-CoA thioesterase FadM
Fpe_01035	no_COG		2.40117	5.28233	7.19355	2.13e-20	3.73e-19	1173132	1174385	No	Protein of unknown function (DUF3396)		fill_color=chr23
Fpe_00339	T		2.38996	5.24142	7.59245	1.01e-17	1.43e-16	354738	355340	Yes	tellurium resistance protein TerZ		fill_color=chr23	COG2310===Stress response protein SCP2
Fpe_00111	TK		2.36187	5.14036	4.7979	2.62e-07	1.22e-06	123327	124010	Yes	two-component system OmpR family copper resistance phosphate regulon response regulator CusR		fill_color=chr23	COG0745===DNA-binding response regulator OmpR family contains REC and winged-helix (wHTH) domain
Fpe_00662	no_COG		2.33885	5.05899	4.65165	1.08e-16	1.32e-15	749635	751449	Yes	KAP family P-loop domain-containing protein	Genomic Island 4	fill_color=chr23
Fpe_00548	no_COG		2.33863	5.05824	6.46075	2.14e-07	1.01e-06	577488	579626	Yes	hypothetical protein	Fp-specific Island 2	fill_color=chr23
Fpe_00240	P		2.33411	5.04241	7.67779	5.94e-13	4.99e-12	241150	242073	No	iron complex transport system substrate-binding protein		fill_color=chr23	COG4607===ABC-type enterochelin transport system periplasmic component
Fpe_00930	V		2.32879	5.02385	5.51344	1.42e-09	8.61e-09	1052921	1054096	Yes	membrane fusion protein adhesin transport system	Genomic Island 5	fill_color=chr23	COG1566===Multidrug resistance efflux pump
Fpe_02197	I		2.32601	5.01416	4.25408	3.8e-18	5.83e-17	2518153	2519256	Yes	linoleoyl-CoA desaturase		fill_color=chr23	COG3239===Fatty acid desaturase
Fpe_01337	no_COG		2.32528	5.01164	4.23136	5.45e-17	7.03e-16	1514820	1515299	Yes	tight adherence protein E	Flp pili	fill_color=chr3
Fpe_01628	no_COG		2.30163	4.93013	7.60749	4.52e-18	6.74e-17	1836919	1840296	No	hypothetical protein		fill_color=chr23
Fpe_01923	R		2.30011	4.92495	5.84734	1.31e-18	2.06e-17	2188489	2190240	No	Predicted acyltransferase LPLAT superfamily	Arylpolyene	fill_color=blue	COG4261===Predicted acyltransferase LPLAT superfamily
Fpe_00350	T		2.29929	4.92214	6.9302	1.69e-15	1.86e-14	365865	366515	Yes	Stress response protein SCP2		fill_color=chr23	COG2310===Stress response protein SCP2
Fpe_01331	UW		2.28284	4.86636	7.77771	3.93e-14	3.67e-13	1508167	1509093	Yes	tight adherence protein B	Flp pili	fill_color=chr3	COG4965===Flp pilus assembly protein TadB
Fpe_01813	E		2.28063	4.85889	8.1411	1.33e-11	9.81e-11	2069213	2069953	No	polar amino acid transport system permease protein		fill_color=chr23	COG0765===ABC-type amino acid transport system permease component
Fpe_01333	UW		2.27835	4.85124	8.13982	1.19e-15	1.31e-14	1510030	1511253	No	tight adherence protein D	Flp pili	fill_color=chr3	COG5010===Flp pilus assembly protein TadD contains TPR repeats
Fpe_01472	IQ		2.27091	4.82626	9.08273	2.84e-13	2.48e-12	1668221	1670365	No	acyl-[acyl-carrier-protein]-phospholipid O-acyltransferase / long-chain-fatty-acid--[acyl-carrier-protein] ligase		fill_color=chr23	COG0318===Acyl-CoA synthetase (AMP-forming)/AMP-acid ligase II
Fpe_01928	IQ		2.26402	4.80329	4.68396	6.25e-16	7.09e-15	2194176	2195357	No	3-oxoacyl-[acyl-carrier-protein] synthase-1	Arylpolyene	fill_color=blue	COG0304===3-oxoacyl-(acyl-carrier-protein) synthase
Fpe_01334	no_COG		2.2629	4.79954	6.88872	1.24e-16	1.51e-15	1511313	1512149	Yes	pilus assembly protein CpaB	Flp pili	fill_color=chr3
Fpe_01046	no_COG		2.2619	4.79624	3.30188	1.08e-15	1.2e-14	1190083	1191000	Yes	Dinucleotide-utilizing enzymes involved in molybdopterin and thiamine biosynthesis family 2		fill_color=chr23
Fpe_01298	P		2.24435	4.73824	5.33472	7.86e-14	7.19e-13	1473547	1474533	No	iron complex transport system permease protein		fill_color=chr23	COG4605===ABC-type enterochelin transport system permease component
Fpe_01170	E		2.2432	4.73446	8.86725	3.51e-11	2.48e-10	1311542	1312792	No	N-carbamoyl-L-amino-acid hydrolase		fill_color=chr23	COG0624===Acetylornithine deacetylase/Succinyl-diaminopimelate desuccinylase or related deacylase
Fpe_00929	V		2.21819	4.65308	5.85059	2.02e-08	1.08e-07	1050780	1052924	Yes	ATP-binding cassette subfamily C LapB	Genomic Island 5	fill_color=chr23	COG2274===ABC-type bacteriocin/lantibiotic exporters contain an N-terminal double-glycine peptidase domain
Fpe_01927	no_COG		2.20214	4.60162	2.55082	1.07e-12	8.84e-12	2193601	2194170	No	Protein of unknown function (DUF3261)	Arylpolyene	fill_color=blue
Fpe_00347	T		2.18886	4.55946	7.04613	4.92e-16	5.64e-15	362661	364181	Yes	Serine/threonine protein phosphatase PrpC		fill_color=chr23	COG0631===Serine/threonine protein phosphatase PrpC
Fpe_00343	no_COG		2.18777	4.55599	6.81386	3.79e-17	4.97e-16	358182	359303	Yes	TRSP domain C terminus to PRTase_2		fill_color=chr23
Fpe_01335	UW		2.18266	4.5399	8.62425	1.02e-14	1.04e-13	1512152	1513597	No	pilus assembly protein CpaC	Flp pili	fill_color=chr3	COG4964===Flp pilus assembly protein secretin CpaC
Fpe_00604	no_COG		2.18164	4.53668	6.06348	8.19e-09	4.53e-08	690350	691138	No	hypothetical protein		fill_color=chr23
Fpe_00346	no_COG		2.17144	4.50474	7.3465	1.7e-17	2.33e-16	361126	362625	Yes	Uncharacterized protein with protein kinase and helix-hairpin-helix DNA-binding domains		fill_color=chr23
Fpe_01658	S		2.16876	4.49637	5.90189	4.3e-12	3.37e-11	1877256	1878365	Yes	nucleoid-associated protein		fill_color=chr23	COG3081===Nucleoid-associated protein YejK (function unknown)
Fpe_02128	H		2.16602	4.48783	7.37232	3.42e-06	1.35e-05	2435773	2436927	No	methionine adenosyltransferase		fill_color=chr23	COG0192===S-adenosylmethionine synthetase
Fpe_01300	P		2.1576	4.46172	7.91165	2.03e-10	1.34e-09	1475493	1476599	No	iron complex transport system substrate-binding protein		fill_color=chr23	COG4607===ABC-type enterochelin transport system periplasmic component
Fpe_00863	no_COG		2.15388	4.45024	7.03107	7.07e-16	7.89e-15	968300	970735	No	Autotransporter beta-domain-containing protein		fill_color=chr23
Fpe_02166	no_COG		2.1409	4.41038	4.80851	3.19e-13	2.74e-12	2484794	2485375	Yes	hypothetical protein		fill_color=chr23
Fpe_00338	V		2.13946	4.40596	8.14474	5.59e-13	4.72e-12	353551	354741	Yes	tellurite resistance protein TerA		fill_color=chr23	COG4110===Uncharacterized protein involved in tellurium resistance
Fpe_01939	no_COG		2.1379	4.40122	6.15924	6.95e-15	7.14e-14	2208903	2210126	Yes	hypothetical protein		fill_color=chr23
Fpe_01332	no_COG		2.11849	4.34238	7.75216	1.03e-13	9.3e-13	1509104	1509964	No	tight adherence protein C	Flp pili	fill_color=chr3
Fpe_00791	X		2.11107	4.32011	7.38442	1.88e-10	1.25e-09	881636	882331	No	Phage repressor protein C contains Cro/C1-type HTH and peptisase s24 domains		fill_color=chr23	COG2932===Phage repressor protein C contains Cro/C1-type HTH and peptisase s24 domains
Fpe_02167	no_COG		2.10555	4.30361	8.97957	5.01e-12	3.87e-11	2485378	2487420	Yes	AIPR protein		fill_color=chr23
Fpe_00823	S		2.10239	4.29422	6.99714	4.65e-15	4.87e-14	913762	915024	No	Uncharacterized membrane protein		fill_color=chr23	COG4393===Uncharacterized membrane protein
Fpe_01336	UW		2.07953	4.22669	8.00253	3.65e-15	3.89e-14	1513615	1514790	No	pilus assembly protein CpaE	Flp pili	fill_color=chr3	COG4963===Flp pilus assembly protein ATPase CpaE
Fpe_00335	T		2.07803	4.22231	7.52806	1.97e-16	2.37e-15	351166	351741	Yes	tellurium resistance protein TerD		fill_color=chr23	COG2310===Stress response protein SCP2
Fpe_01925	M		2.07392	4.21028	3.90874	4.98e-15	5.19e-14	2190649	2191257	No	Outer membrane lipoprotein-sorting protein	Arylpolyene	fill_color=blue	COG2834===Outer membrane lipoprotein-sorting protein
Fpe_00605	IQR		2.05955	4.16857	3.43127	9.01e-07	3.87e-06	691180	691953	Yes	Enoyl-(Acyl carrier protein) reductase	Colibactin	fill_color=green	COG1028===NAD(P)-dependent dehydrogenase short-chain alcohol dehydrogenase family
Fpe_01631	no_COG		2.04977	4.1404	7.82789	3.28e-14	3.12e-13	1844395	1845144	Yes	Immunity protein 52		fill_color=chr23
Fpe_01937	no_COG		2.04245	4.11945	8.72938	4.52e-12	3.52e-11	2203723	2205336	No	type VI secretion system protein VasJ	T6SS	fill_color=dred
Fpe_00351	S		2.03173	4.08895	8.02546	7.52e-13	6.27e-12	366552	367190	Yes	Uncharacterized conserved protein YegL contains vWA domain of TerY type		fill_color=chr23	COG4245===Uncharacterized conserved protein YegL contains vWA domain of TerY type
Fpe_00661	no_COG		2.03106	4.08704	5.09654	3.11e-13	2.7e-12	748416	749552	Yes	SIR2-like domain-containing protein	Genomic Island 4	fill_color=chr23
Fpe_02169	no_COG		2.03075	4.08617	8.74784	9.88e-12	7.5e-11	2488381	2491074	Yes	Z1 domain-containing protein		fill_color=chr23
Fpe_01128	no_COG		2.02337	4.06533	4.01909	9.44e-07	4.04e-06	1271736	1271906	Yes	hypothetical protein		fill_color=chr23
Fpe_02191	I		2.02088	4.05832	7.2605	2.87e-13	2.5e-12	2512338	2513339	Yes	3-oxoacyl-[acyl-carrier-protein] synthase-3		fill_color=chr23	COG0332===3-oxoacyl-[acyl-carrier-protein] synthase III
Fpe_01329	no_COG		2.01422	4.03961	4.81673	1.68e-12	1.36e-11	1506361	1506564	Yes	pilus assembly protein Flp/PilA	Flp pili	fill_color=chr3
Fpe_01195	no_COG		2.01084	4.03016	7.86311	7.82e-12	5.99e-11	1350006	1351322	Yes	Uncharacterized protein conserved in bacteria		fill_color=chr23
Fpe_01917	no_COG		2.01042	4.02901	6.07391	1.56e-12	1.27e-11	2184153	2184881	No	3-oxoacyl-(acyl-carrier-protein) synthase	Arylpolyene	fill_color=blue
Fpe_00822	MI		2.00762	4.02119	8.76964	1.88e-10	1.25e-09	913056	913619	No	hypothetical protein		fill_color=chr23	COG3470===Uncharacterized protein probably involved in high-affinity Fe2+ transport
Fpe_01342	M		2.00247	4.00686	2.53147	3.47e-05	0.000119411	1521043	1521474	Yes	lysozyme		fill_color=chr23	COG3772===Phage-related lysozyme (muramidase) GH24 family
Fpe_00007	P		-2.01983	0.246587	8.97403	0.00250359	0.00629367	6949	9186	Yes	catalase		fill_color=chr23	COG0753===Catalase
Fpe_00861	no_COG		-2.02034	0.246499	6.92102	2.1e-14	2.05e-13	966176	966772	No	cell division protein ZapC		fill_color=chr23
Fpe_02122	TK		-2.03895	0.24334	9.37699	3.47e-10	2.26e-09	2427902	2428588	No	two-component system OmpR family response regulator	Transcription	fill_color=chr23	COG0745===DNA-binding response regulator OmpR family contains REC and winged-helix (wHTH) domain
Fpe_00302	H		-2.03921	0.243297	6.05746	2e-10	1.32e-09	306844	307263	No	preQ(0) biosynthesis protein QueD		fill_color=chr23	COG0720===6-pyruvoyl-tetrahydropterin synthase
Fpe_02117	O		-2.04084	0.243023	12.5743	5.06e-06	1.94e-05	2422058	2423701	No	chaperonin GroEL	Protein Folding	fill_color=chr23	COG0459===Chaperonin GroEL (HSP60 family)
Fpe_02327	J		-2.04537	0.242261	9.71259	2.45e-08	1.3e-07	2682104	2682613	No	peptide deformylase		fill_color=chr23	COG0242===Peptide deformylase
Fpe_00385	L		-2.05029	0.241436	9.63933	3.22e-09	1.85e-08	405008	406792	No	DNA primase		fill_color=chr23	COG0358===DNA primase (bacterial type)
Fpe_02116	O		-2.07843	0.236772	10.2161	2.37e-06	9.61e-06	2421717	2422010	No	chaperonin GroES	Protein Folding	fill_color=chr23	COG0234===Co-chaperonin GroES (HSP10)
Fpe_00982	no_COG		-2.10233	0.232882	6.28129	4.76e-16	5.48e-15	1107513	1108472	Yes	hypothetical protein		fill_color=chr23
Fpe_00726	CHR		-2.11294	0.231175	12.3926	3.59e-05	0.00012304	820673	821677	No	D-lactate dehydrogenase	Metabolism(Decarboxylase/lyases etc.)	fill_color=chr23	COG1052===Lactate dehydrogenase or related 2-hydroxyacid dehydrogenase
Fpe_01790	UXR		-2.11563	0.230745	4.00552	8.9e-12	6.8e-11	2041582	2044101	No	type VI secretion system secreted protein VgrG		fill_color=chr23	COG3501===Uncharacterized conserved protein implicated in type VI secretion and phage assembly
Fpe_01120	no_COG		-2.14447	0.226178	2.39394	6.63e-09	3.73e-08	1264657	1265340	Yes	phage replication protein P		fill_color=chr23
Fpe_01212	G		-2.1842	0.220035	5.15381	1.98e-14	1.95e-13	1374507	1376291	No	PTS system ascorbate-specific IIB component L-Asc family (TC 4.A.7.1.1)/PTS system ascorbate-specific IIC component L-Asc family (TC 4.A.7.1.1)	Transport (Sugar AA Ions etc.)	fill_color=chr23	COG3037===Ascorbate-specific PTS system EIIC-type component UlaA
Fpe_01115	no_COG		-2.20541	0.216822	2.50279	5.92e-10	3.73e-09	1261155	1261526	Yes	hypothetical protein		fill_color=chr23
Fpe_01273	L		-2.20749	0.21651	7.61254	9.18e-06	3.41e-05	1445580	1446422	No	Endonuclease IV		fill_color=chr23	COG0648===Endonuclease IV
Fpe_02121	T		-2.21103	0.21598	7.60858	5.68e-17	7.22e-16	2426597	2427889	No	two-component system OmpR family sensor kinase	Transcription	fill_color=chr23	COG0642===Signal transduction histidine kinase
Fpe_01218	no_COG		-2.21421	0.215505	6.52311	3.42e-16	4.04e-15	1383079	1384476	Yes	hypothetical protein		fill_color=chr23
Fpe_01589	T		-2.21756	0.215004	9.85989	1.93e-10	1.28e-09	1796263	1796820	No	sigma-E factor negative regulatory protein RseA	Transcription	fill_color=chr23	COG3073===Negative regulator of sigma E activity
Fpe_01510	D		-2.23372	0.21261	6.09236	5.64e-14	5.2e-13	1714246	1714812	No	intracellular septation protein		fill_color=chr23	COG2917===Intracellular septation protein A
Fpe_01704	FR		-2.23599	0.212276	7.77618	4.24e-15	4.46e-14	1936056	1936646	No	5'-deoxynucleotidase		fill_color=chr23	COG1896===5'-deoxynucleotidase YfbR and related HD superfamily hydrolases
Fpe_00976	N		-2.23722	0.212095	6.05325	2.52e-14	2.43e-13	1103460	1104359	Yes	chromosome partitioning related protein ParA		fill_color=chr23	COG1192===Cellulose biosynthesis protein BcsQ
Fpe_00981	no_COG		-2.24162	0.211449	6.76045	1.83e-16	2.22e-15	1106445	1107485	Yes	hypothetical protein		fill_color=chr23
Fpe_01806	P		-2.24532	0.210907	6.11675	0.000134064	0.000429202	2061447	2061674	No	cation transport regulator	Transport (Sugar AA Ions etc.)	fill_color=chr23	COG4572===Cation transport regulator ChaB
Fpe_00224	S		-2.25088	0.210096	7.19156	4e-11	2.81e-10	225170	225508	No	hypothetical protein		fill_color=chr23	COG3085===Uncharacterized conserved protein YifE UPF0438 family
Fpe_00701	U		-2.2607	0.208671	9.34166	2.04e-11	1.48e-10	786649	790476	No	autotransporter secretion inner membrane protein TamB	Transport (Sugar AA Ions etc.)	fill_color=chr23	COG2911===Autotransporter translocation and assembly factor TamB
Fpe_01998	no_COG		-2.2743	0.206714	13.5313	2.49e-07	1.17e-06	2286864	2287928	Yes	hypothetical protein		fill_color=chr23
Fpe_01776	no_COG		-2.2858	0.205071	5.79741	9.53e-17	1.17e-15	2025528	2025860	No	Nitrous oxide-stimulated promoter		fill_color=chr23
Fpe_01474	P		-2.29648	0.203559	7.21821	4.3e-09	2.44e-08	1671126	1673456	No	ferrous iron transport protein B	Transport (Sugar AA Ions etc.)	fill_color=chr23	COG0370===Fe2+ transport system protein B
Fpe_01984	no_COG		-2.29961	0.203118	7.76542	3.94e-16	4.59e-15	2268447	2269595	No	ABC-2 type transport system permease protein	Transport (Sugar AA Ions etc.)	fill_color=chr23
Fpe_02246	no_COG		-2.30137	0.20287	8.0438	3.86e-07	1.74e-06	2576865	2578427	Yes	hypothetical protein		fill_color=chr23
Fpe_01061	L		-2.31977	0.200299	8.92704	3.24e-13	2.78e-12	1208335	1210176	No	Excinuclease ABC subunit C		fill_color=chr23	COG0322===Excinuclease UvrABC nuclease subunit
Fpe_00077	O		-2.34269	0.197142	10.3646	3.19e-09	1.84e-08	88313	89446	No	molecular chaperone DnaJ	Protein Folding	fill_color=chr23	COG0484===DnaJ-class molecular chaperone with C-terminal Zn finger domain
Fpe_00672	no_COG		-2.3447	0.196868	5.08301	2.98e-16	3.54e-15	762051	762551	Yes	hypothetical protein		fill_color=chr23
Fpe_02115	R		-2.34549	0.19676	5.60673	8.92e-11	6.09e-10	2421117	2421557	No	UPF0716 protein FxsA		fill_color=chr23	COG3030===Protein affecting phage T7 exclusion by the F plasmid UPF0716 family
Fpe_01675	G		-2.35155	0.195935	8.91396	0.00047129	0.00136074	1904643	1907054	Yes	quinoprotein glucose dehydrogenase	Metabolism(Decarboxylase/lyases etc.)	fill_color=chr23	COG4993===Glucose dehydrogenase
Fpe_00834	O		-2.35705	0.19519	11.7345	2.3e-08	1.22e-07	928919	930793	No	molecular chaperone HtpG	Protein Folding	fill_color=chr23	COG0326===Molecular chaperone HSP90 family
Fpe_01168	E		-2.36513	0.1941	6.99633	3.48e-05	0.000119836	1309160	1310200	No	D-methionine transport system ATP-binding protein		fill_color=chr23	COG1135===ABC-type methionine transport system ATPase component
Fpe_01518	O		-2.36588	0.193999	6.25428	5.64e-18	8.18e-17	1721745	1722611	No	heat shock protein HtpX	Protein Folding	fill_color=chr23	COG0501===Zn-dependent protease with chaperone function
Fpe_01966	no_COG		-2.38499	0.191446	8.17577	2.14e-11	1.54e-10	2246849	2247733	No	glutamyl-Q tRNA(Asp) synthetase		fill_color=chr23
Fpe_00508	H		-2.39345	0.190326	8.92044	2.12e-14	2.06e-13	528589	529482	No	triphosphoribosyl-dephospho-CoA synthase		fill_color=chr23	COG1767===Triphosphoribosyl-dephospho-CoA synthetase
Fpe_00925	I		-2.40981	0.188181	5.88551	4.4e-10	2.82e-09	1040996	1041919	No	malonate decarboxylase epsilon subunit	Metabolism(Decarboxylase/lyases etc.)	fill_color=chr23	COG0331===Malonyl CoA-acyl carrier protein transacylase
Fpe_01705	M		-2.4167	0.187284	12.6298	9.3e-12	7.08e-11	1936721	1937635	No	UDP-3-O-[3-hydroxymyristoyl] N-acetylglucosamine deacetylase	Metabolism(Decarboxylase/lyases etc.)	fill_color=chr23	COG0774===UDP-3-O-acyl-N-acetylglucosamine deacetylase
Fpe_01680	P		-2.41828	0.187079	9.42006	3.63e-06	1.42e-05	1911392	1912288	No	manganese/iron transport system ATP-binding protein	Transport (Sugar AA Ions etc.)	fill_color=chr23	COG1121===ABC-type Mn2+/Zn2+ transport system ATPase component
Fpe_00980	no_COG		-2.42497	0.186214	7.3906	2.96e-20	5.12e-19	1105795	1106115	Yes	integrating conjugative element PFGI_1 class ParB family protein		fill_color=chr23
Fpe_01681	P		-2.42914	0.185676	8.3994	4.99e-07	2.21e-06	1912285	1913196	No	manganese/iron transport system substrate-binding protein	Transport (Sugar AA Ions etc.)	fill_color=chr23	COG0803===ABC-type Zn uptake system ZnuABC Zn-binding component ZnuA
Fpe_00443	K		-2.44017	0.184262	7.63721	8.4e-17	1.04e-15	459840	462110	No	DNA-binding transcriptional regulator LacI/PurR family	Transcription	fill_color=chr23	COG1609===DNA-binding transcriptional regulator LacI/PurR family
Fpe_01590	K		-2.45615	0.182232	10.5953	4.75e-12	3.69e-11	1796850	1797422	No	RNA polymerase sigma-70 factor ECF subfamily	Transcription	fill_color=chr23	COG1595===DNA-directed RNA polymerase specialized sigma subunit sigma24 family
Fpe_00750	K		-2.45712	0.18211	9.53302	6.1e-10	3.83e-09	844835	845050	No	transcriptional regulator Nlp family	Transcription	fill_color=chr23	COG3423===Predicted transcriptional regulator lambda repressor-like DNA-binding domain
Fpe_00112	no_COG		-2.50004	0.176771	6.58646	1.64e-17	2.27e-16	124564	125928	No	Histidine phosphatase superfamily (branch 2)		fill_color=chr23
Fpe_00815	Q		-2.51986	0.17436	8.3355	1.81e-11	1.32e-10	904261	905103	Yes	Aldo/keto reductase	Metabolism(Decarboxylase/lyases etc.)	fill_color=chr23	COG0656===Aldo/keto reductase related to diketogulonate reductase
Fpe_00516	C		-2.52994	0.173146	9.78554	4.41e-11	3.08e-10	536543	538072	No	citrate lyase subunit alpha / citrate CoA-transferase	Metabolism(Decarboxylase/lyases etc.)	fill_color=chr23	COG3051===Citrate lyase alpha subunit
Fpe_00924	no_COG		-2.55521	0.17014	7.00509	1.35e-10	9.13e-10	1040383	1041012	Yes	phosphoribosyl-dephospho-CoA transferase		fill_color=chr23
Fpe_01965	J		-2.56499	0.16899	9.68813	1.47e-09	8.83e-09	2246325	2246780	No	transcriptional regulator TraR/DksA family	Transcription	fill_color=chr23	COG1734===RNA polymerase-binding transcription factor DksA
Fpe_00009	S		-2.56634	0.168831	8.78205	4.08e-15	4.31e-14	11542	12189	No	hypothetical protein		fill_color=chr23	COG3789===Uncharacterized protein YjfI DUF2170 family
Fpe_01596	E		-2.5957	0.16543	7.2054	2.55e-16	3.05e-15	1803363	1804268	No	Threonine/homoserine efflux transporter RhtA	Transport (Sugar AA Ions etc.)	fill_color=chr23	COG5006===Threonine/homoserine efflux transporter RhtA
Fpe_01302	S		-2.60996	0.163804	7.21287	1.01e-05	3.7e-05	1478438	1478857	No	putative oxidoreductase		fill_color=chr23	COG2259===Uncharacterized membrane protein YphA DoxX/SURF4 family
Fpe_00923	R		-2.62015	0.162651	7.98792	5.11e-10	3.22e-09	1039413	1040372	No	malonate transporter	Transport (Sugar AA Ions etc.)	fill_color=chr23	COG0679===Predicted permease
Fpe_01985	V		-2.63358	0.161143	9.79707	1.25e-14	1.26e-13	2269577	2270548	No	HlyD family secretion protein		fill_color=chr23	COG1566===Multidrug resistance efflux pump
Fpe_01213	KG		-2.64314	0.16008	7.20985	1.39e-18	2.17e-17	1376664	1377431	No	transcriptional regulator DeoR family		fill_color=chr23	COG1349===DNA-binding transcriptional regulator of sugar metabolism DeoR/GlpR family
Fpe_01573	O		-2.64838	0.159499	10.9639	1.73e-11	1.27e-10	1776472	1777800	No	ATP-dependent HslUV protease ATP-binding subunit HslU		fill_color=chr23	COG1220===ATP-dependent protease HslVU (ClpYQ) ATPase subunit
Fpe_00501	S		-2.67251	0.156853	8.34732	3.33e-19	5.49e-18	518956	520986	No	putative oligopeptide transporter OPT family	Transport (Sugar AA Ions etc.)	fill_color=chr23	COG1297===Uncharacterized membrane protein oligopeptide transporter (OPT) family
Fpe_00922	no_COG		-2.68534	0.155464	8.64508	1.42e-09	8.61e-09	1038515	1039321	No	malonate decarboxylase gamma subunit	Metabolism(Decarboxylase/lyases etc.)	fill_color=chr23
Fpe_01764	S		-2.68831	0.155145	8.64051	5.83e-15	6.05e-14	2011049	2011645	No	LemA protein		fill_color=chr23	COG1704===Uncharacterized conserved protein
Fpe_00277	J		-2.70936	0.152898	9.91121	1.64e-12	1.33e-11	279891	280517	No	23S rRNA Um-2552 2'-O-methyltransferase (EC 2.1.1.166)		fill_color=chr23	COG0293===23S rRNA U2552 (ribose-2'-O)-methylase RlmE/FtsJ
Fpe_00921	I		-2.7665	0.14696	8.62209	1.63e-09	9.78e-09	1037679	1038518	No	malonate decarboxylase beta subunit	Metabolism(Decarboxylase/lyases etc.)	fill_color=chr23	COG0777===Acetyl-CoA carboxylase beta subunit
Fpe_02280	O		-2.77294	0.146306	10.6886	6.14e-15	6.33e-14	2613647	2614252	No	peptidyl-prolyl cis-trans isomerase A (cyclophilin A)		fill_color=chr23	COG0652===Peptidyl-prolyl cis-trans isomerase (rotamase) - cyclophilin family
Fpe_00514	C		-2.81466	0.142135	6.8007	5.92e-17	7.49e-16	535356	535646	No	citrate lyase subunit gamma (acyl carrier protein)	Metabolism(Decarboxylase/lyases etc.)	fill_color=chr23	COG3052===Citrate lyase gamma subunit
Fpe_00425	G		-2.81891	0.141718	7.56659	4.82e-17	6.24e-16	438564	439784	No	MFS transporter putative metabolite:H+ symporter	Transport (Sugar AA Ions etc.)	fill_color=chr23	COG2814===Predicted arabinose efflux permease MFS family
Fpe_00515	G		-2.8296	0.140671	8.52259	6.47e-16	7.29e-15	535643	536530	No	citrate lyase subunit beta / citryl-CoA lyase	Metabolism(Decarboxylase/lyases etc.)	fill_color=chr23	COG2301===Citrate lyase beta subunit
Fpe_01572	O		-2.84243	0.139425	10.8541	9.03e-14	8.22e-13	1775919	1776446	No	HslV component of HslUV peptidase. Threonine peptidase. MEROPS family T01B		fill_color=chr23	COG5405===ATP-dependent protease HslVU (ClpYQ) peptidase subunit
Fpe_00076	O		-2.89881	0.134082	14.0166	1.31e-12	1.07e-11	86142	88055	No	molecular chaperone DnaK	Protein Folding	fill_color=chr23	COG0443===Molecular chaperone DnaK (HSP70)
Fpe_00920	no_COG		-2.92416	0.131747	6.57533	6.66e-12	5.13e-11	1037387	1037692	No	malonate decarboxylase delta subunit	Metabolism(Decarboxylase/lyases etc.)	fill_color=chr23
Fpe_02278	C		-2.95528	0.128935	9.93957	6.14e-10	3.84e-09	2612216	2612764	No	NAD(P)H-dependent FMN reductase	Metabolism(Decarboxylase/lyases etc.)	fill_color=chr23	COG0431===NAD(P)H-dependent FMN reductase
Fpe_01011	no_COG		-2.97817	0.126906	6.85185	4.57e-24	1.01e-22	1137248	1138180	Yes	Sel1 repeat-containing protein		fill_color=chr23
Fpe_01186	O		-2.9825	0.126526	10.6254	2.37e-14	2.29e-13	1336455	1336895	Yes	heat shock protein HslJ	Protein Folding	fill_color=chr23	COG3187===Heat shock protein HslJ
Fpe_01544	P		-2.98638	0.126186	5.57356	4.78e-18	7.08e-17	1749834	1751138	No	ammonium transporter	Transport (Sugar AA Ions etc.)	fill_color=chr23	COG0004===Ammonia channel protein AmtB
Fpe_01763	S		-3.00942	0.124186	7.86901	2.39e-15	2.58e-14	2010117	2011049	Yes	uncharacterized protein		fill_color=chr23	COG1512===Uncharacterized membrane protein YgcG contains a TPM-fold domain
Fpe_01475	P		-3.01897	0.123368	4.05864	3.66e-14	3.44e-13	1673453	1673701	No	ferrous iron transport protein A	Transport (Sugar AA Ions etc.)	fill_color=chr23	COG1918===Fe2+ transport system protein FeoA
Fpe_01775	M		-3.04275	0.12135	9.59522	3.66e-19	5.99e-18	2024441	2025526	No	membrane-bound lytic murein transglycosylase C	Metabolism(Decarboxylase/lyases etc.)	fill_color=chr23	COG0741===Soluble lytic murein transglycosylase and related regulatory proteins (some contain LysM/invasin domains)
Fpe_01002	no_COG		-3.04286	0.121341	2.95324	1.45e-17	2.02e-16	1128303	1128551	Yes	hypothetical protein		fill_color=chr23
Fpe_00919	no_COG		-3.12857	0.114342	9.82435	3.46e-11	2.46e-10	1035622	1037283	No	malonate decarboxylase alpha subunit	Metabolism(Decarboxylase/lyases etc.)	fill_color=chr23
Fpe_00622	L		-3.14669	0.112915	11.6256	9.29e-15	9.49e-14	709568	711571	No	Excinuclease ABC subunit B		fill_color=chr23	COG0556===Excinuclease UvrABC helicase subunit UvrB
Fpe_01217	E		-3.20524	0.108425	10.9942	4.46e-08	2.27e-07	1381174	1382775	No	aspartate 4-decarboxylase	Metabolism(Decarboxylase/lyases etc.)	fill_color=chr23	COG0436===Aspartate/methionine/tyrosine aminotransferase
Fpe_00941	no_COG		-3.21593	0.107624	6.28851	1.22e-13	1.09e-12	1067109	1067372	No	Sugar efflux transporter for intercellular exchange	Transport (Sugar AA Ions etc.)	fill_color=chr23
Fpe_01157	S		-3.231	0.106505	10.097	3.51e-08	1.83e-07	1298994	1299767	No	Uncharacterized membrane protein YcaP DUF421 family		fill_color=chr23	COG2323===Uncharacterized membrane protein YcaP DUF421 family
Fpe_02050	no_COG		-3.24013	0.105833	5.81109	1.92e-09	1.14e-08	2352499	2353068	Yes	hypothetical protein		fill_color=chr23
Fpe_01260	S		-3.25456	0.104781	6.50825	5.75e-18	8.29e-17	1429940	1430275	Yes	hypothetical protein		fill_color=chr23	COG3422===Uncharacterized conserved protein YegP UPF0339 family
Fpe_00146	P		-3.27332	0.103427	7.01199	3.17e-14	3.03e-13	158526	159884	No	MFS transporter NNP family nitrate/nitrite transporter	Transport (Sugar AA Ions etc.)	fill_color=chr23	COG2223===Nitrate/nitrite transporter NarK
Fpe_01807	R		-3.27437	0.103352	8.29119	7.74e-28	2.16e-26	2062081	2063064	No	hypothetical protein	Transport (Sugar AA Ions etc.)	fill_color=chr23	COG0679===Predicted permease
Fpe_00025	K		-3.30651	0.101074	12.1866	1.66e-17	2.29e-16	31664	32524	No	RNA polymerase sigma 32 subunit RpoH		fill_color=chr23	COG0568===DNA-directed RNA polymerase sigma subunit (sigma70/sigma32)
Fpe_00700	M		-3.40672	0.0942919	9.91513	5.08e-21	9.54e-20	784924	786645	No	autotransporter secretion outer membrane protein TamA	Transport (Sugar AA Ions etc.)	fill_color=chr23	COG0729===Outer membrane translocation and assembly module TamA
Fpe_01162	L		-3.40855	0.0941728	8.6684	1.26e-08	6.83e-08	1301906	1303339	No	deoxyribodipyrimidine photo-lyase	Metabolism(Decarboxylase/lyases etc.)	fill_color=chr23	COG0415===Deoxyribodipyrimidine photolyase
Fpe_01216	R		-3.41192	0.0939527	10.2399	9.31e-08	4.62e-07	1379448	1381148	No	aspartate-alanine antiporter	Transport (Sugar AA Ions etc.)	fill_color=chr23	COG2985===Uncharacterized membrane protein YbjL putative transporter
Fpe_00518	O		-3.46467	0.0905796	13.9745	9.53e-14	8.64e-13	538962	541532	No	ATP-dependent Clp protease ATP-binding subunit ClpB		fill_color=chr23	COG0542===ATP-dependent Clp protease ATP-binding subunit ClpA
Fpe_00513	C		-3.46686	0.090442	9.15812	7.49e-18	1.07e-16	534300	535355	No	[citrate (pro-3S)-lyase] ligase	Metabolism(Decarboxylase/lyases etc.)	fill_color=chr23	COG3053===Citrate lyase synthetase
Fpe_02277	PV		-3.53058	0.0865345	13.0894	2.18e-13	1.91e-12	2611555	2612148	No	starvation-inducible DNA-binding protein		fill_color=chr23	COG0783===DNA-binding ferritin-like protein (oxidative damage protectant)
Fpe_01081	no_COG		-3.53884	0.0860403	5.25062	1.29e-33	4.93e-32	1226065	1226406	Yes	DNA polymerase V		fill_color=chr23
Fpe_01181	IQR		-3.54375	0.085748	11.8822	2.71e-06	1.08e-05	1327165	1328052	No	hypothetical protein		fill_color=chr23	COG1028===NAD(P)-dependent dehydrogenase short-chain alcohol dehydrogenase family
Fpe_01878	S		-3.56965	0.0842227	9.62991	4.2e-11	2.94e-10	2145373	2145936	No	Uncharacterized membrane protein HdeD DUF308 family		fill_color=chr23	COG3247===Uncharacterized membrane protein HdeD DUF308 family
Fpe_00636	no_COG		-3.63628	0.0804214	4.73551	4.07e-32	1.45e-30	725658	726098	Yes	hypothetical protein		fill_color=chr23
Fpe_01161	O		-3.66602	0.0787805	8.45319	4.42e-10	2.82e-09	1301418	1301864	No	peptide-methionine (R)-S-oxide reductase		fill_color=chr23	COG0229===Peptide methionine sulfoxide reductase MsrB
Fpe_01160	C		-3.70212	0.0768337	8.21649	1.55e-14	1.54e-13	1300842	1301360	No	cytochrome b561		fill_color=chr23	COG3038===Cytochrome b561
Fpe_00723	no_COG		-3.72894	0.0754182	9.83855	4.15e-18	6.23e-17	818198	818386	No	hypothetical protein		fill_color=chr23
Fpe_02026	no_COG		-3.76372	0.0736217	10.3348	7.4e-08	3.7e-07	2324548	2326062	Yes	hypothetical protein		fill_color=chr23
Fpe_00790	P		-3.80171	0.0717085	12.9127	4.02e-18	6.12e-17	878737	881436	No	Mg2+-importing ATPase	Transport (Sugar AA Ions etc.)	fill_color=chr23	COG0474===Magnesium-transporting ATPase (P-type)
Fpe_00511	C		-3.8211	0.0707513	9.91487	6.55e-17	8.24e-16	532005	533357	No	citrate carrier protein CCS family	Metabolism(Decarboxylase/lyases etc.)	fill_color=chr23	COG3493===Na+/citrate or Na+/malate symporter
Fpe_00418	Q		-3.85198	0.0692532	12.8152	6.89e-16	7.73e-15	432707	433114	No	lactoylglutathione lyase	Metabolism(Decarboxylase/lyases etc.)	fill_color=chr23	COG0346===Catechol 2 3-dioxygenase or other lactoylglutathione lyase family enzyme
Fpe_00646	O		-3.85778	0.0689752	11.614	5.56e-07	2.46e-06	734313	734750	Yes	heat shock protein HslJ	Protein Folding	fill_color=chr23	COG3187===Heat shock protein HslJ
Fpe_00940	no_COG		-3.941	0.065109	12.6702	1.34e-06	5.59e-06	1065687	1066565	Yes	hypothetical protein		fill_color=chr23
Fpe_00424	no_COG		-3.94863	0.0647657	10.3056	8.15e-10	5.05e-09	437967	438254	No	Uncharacterized protein conserved in bacteria		fill_color=chr23
Fpe_00512	Q		-3.98368	0.0632109	9.52641	3.62e-21	6.91e-20	533449	534291	No	2-keto-4-pentenoate hydratase/2-oxohepta-3-ene-1 7-dioic acid hydratase (catechol pathway)	Metabolism(Decarboxylase/lyases etc.)	fill_color=chr23	COG0179===2-keto-4-pentenoate hydratase/2-oxohepta-3-ene-1 7-dioic acid hydratase (catechol pathway)
Fpe_00477	R		-4.02255	0.0615307	10.4462	3.97e-08	2.04e-07	495870	496115	No	Uncharacterized membrane protein YeaQ/YmgE transglycosylase-associated protein family	Metabolism(Decarboxylase/lyases etc.)	fill_color=chr23	COG2261===Uncharacterized membrane protein YeaQ/YmgE transglycosylase-associated protein family
Fpe_00023	no_COG		-4.0241	0.0614647	4.72566	1.39e-36	5.82e-35	30862	31191	Yes	hypothetical protein		fill_color=chr23
Fpe_01207	L		-4.09301	0.0585977	8.65614	3.89e-16	4.56e-15	1369958	1371457	No	hypothetical protein		fill_color=chr23	COG0433===Archaeal DNA helicase HerA or a related bacterial ATPase contains HAS-barrel and ATPase domains
Fpe_00647	S		-4.10858	0.0579686	9.14132	4.32e-08	2.21e-07	734817	735185	No	Uncharacterized conserved protein YeaO DUF488 family		fill_color=chr23	COG3189===Uncharacterized conserved protein YeaO DUF488 family
Fpe_02098	T		-4.11822	0.0575828	5.79255	5.05e-31	1.69e-29	2404581	2405675	No	two-component system OmpR family sensor histidine kinase BasS	Transcription	fill_color=chr23	COG0642===Signal transduction histidine kinase
Fpe_00419	M		-4.29669	0.0508826	12.1002	1.19e-18	1.89e-17	433142	433624	No	outer membrane lipoprotein SlyB		fill_color=chr23	COG3133===Outer membrane lipoprotein SlyB
Fpe_01461	no_COG		-4.35097	0.0490036	6.86063	3.39e-22	6.89e-21	1660149	1660343	No	sec-independent protein translocase protein TatA	Transport (Sugar AA Ions etc.)	fill_color=chr23
Fpe_01159	O		-4.44692	0.0458506	10.0443	3.37e-14	3.18e-13	1300272	1300805	No	peptide-methionine (S)-S-oxide reductase		fill_color=chr23	COG0225===Peptide methionine sulfoxide reductase MsrA
Fpe_02097	TK		-5.26662	0.0259769	7.88699	2.62e-43	1.58e-41	2403897	2404556	No	two-component system OmpR family response regulator BasR	Transcription	fill_color=chr23	COG0745===DNA-binding response regulator OmpR family contains REC and winged-helix (wHTH) domain
Fpe_01158	no_COG		-5.74741	0.0186147	6.75337	4.11e-64	2.24e-61	1299815	1300087	No	transcriptional regulator TraR/DksA family	Transcription	fill_color=chr23
