# Supplementary material for: Integration host factor regulates colonization factors in the bee gut symbiont Frischella perrara
Source: eLife. 2023 Apr 14;12:e76182. doi: 10.7554/eLife.76182 (PMC10104596; doi:10.7554/eLife.76182)
Supplement: Figure 6—source data 1. [file elife-76182-fig6-data1.xlsx]

## Sheet: Figure 6, gene del colonization
Treatment	Experiment	Plating_condition	Bee_number	num_dilutions_counted	cum_load	avg_load	scab	exp
wt	Exp1	BHIA	1	2	270000	10125000	1	1
wt	Exp1	BHIA	2	2	280000	10500000	1	1
wt	Exp1	BHIA	3	2	95000	3562500	1	1
wt	Exp1	BHIA	4	3	225000	5625000	1	1
wt	Exp1	BHIA	5	3	303000	7575000	0	1
wt	Exp1	BHIA	6	2	460000	17250000	1	1
wt	Exp1	BHIA	7	2	290000	10875000	1	1
wt	Exp1	BHIA	8	1	60000	4500000	0	1
wt	Exp1	BHIA	9	2	288000	10800000	1	1
wt	Exp1	BHIA	10	1	120000	9000000	1	1
ihfA*	Exp1	BHIA	1	2	15700	588750	0	1
ihfA*	Exp1	BHIA	2	2	10100	378750	0	1
ihfA*	Exp1	BHIA	3	2	1190	44625	0	1
ihfA*	Exp1	BHIA	4	0	0	75	0	1
ihfA*	Exp1	BHIA	5	0	0	75	0	1
ihfA*	Exp1	BHIA	6	1	2	150	0	1
ihfA*	Exp1	BHIA	7	3	26000	650000	0	1
ihfA*	Exp1	BHIA	8	2	390	14625	0	1
ihfA*	Exp1	BHIA	9	2	390	14625	0	1
ihfA*	Exp1	BHIA	10	0	0	75	0	1
clbB	Exp1	BHIA	1	2	108000	4050000	1	1
clbB	Exp1	BHIA	2	2	69000	2587500	1	1
clbB	Exp1	BHIA	3	2	180000	6750000	1	1
clbB	Exp1	BHIA	4	3	259000	6475000	1	1
clbB	Exp1	BHIA	5	2	215000	8062500	1	1
clbB	Exp1	BHIA	6	2	174000	6525000	1	1
clbB	Exp1	BHIA	7	2	243000	9112500	1	1
clbB	Exp1	BHIA	8	2	118000	4425000	1	1
clbB	Exp1	BHIA	9	2	118000	4425000	1	1
clbB	Exp1	BHIA	10	1	13000	975000	0	1
T6SS-1	Exp1	BHIA	1	2	700000	26250000	1	1
T6SS-1	Exp1	BHIA	2	2	187000	7012500	1	1
T6SS-1	Exp1	BHIA	3	2	434000	16275000	1	1
T6SS-1	Exp1	BHIA	4	2	163000	6112500	1	1
T6SS-1	Exp1	BHIA	5	3	426000	10650000	1	1
T6SS-1	Exp1	BHIA	6	3	396000	9900000	1	1
T6SS-1	Exp1	BHIA	7	3	555000	13875000	1	1
T6SS-1	Exp1	BHIA	8	3	356000	8900000	1	1
T6SS-1	Exp1	BHIA	9	2	55000	2062500	1	1
T6SS-1	Exp1	BHIA	10	2	135000	5062500	1	1
T6SS-2	Exp1	BHIA	1	2	135000	5062500	0	1
T6SS-2	Exp1	BHIA	2	0	0	75	0	1
T6SS-2	Exp1	BHIA	3	0	0	75	0	1
T6SS-2	Exp1	BHIA	4	2	114000	4275000	0	1
T6SS-2	Exp1	BHIA	5	2	70000	2625000	0	1
T6SS-2	Exp1	BHIA	6	2	98000	3675000	0	1
T6SS-2	Exp1	BHIA	7	0	0	75	0	1
T6SS-2	Exp1	BHIA	8	2	80000	3000000	0	1
T6SS-2	Exp1	BHIA	9	2	47000	1762500	0	1
T6SS-2	Exp1	BHIA	10	1	17000	1275000	0	1
T6SS-1-2	Exp1	BHIA	1	2	50000	1875000	0	1
T6SS-1-2	Exp1	BHIA	2	2	192000	7200000	0	1
T6SS-1-2	Exp1	BHIA	3	2	11100	416250	0	1
T6SS-1-2	Exp1	BHIA	4	0	0	75	0	1
T6SS-1-2	Exp1	BHIA	5	2	77000	2887500	0	1
T6SS-1-2	Exp1	BHIA	6	2	67000	2512500	0	1
T6SS-1-2	Exp1	BHIA	7	2	30000	1125000	0	1
T6SS-1-2	Exp1	BHIA	8	2	350000	13125000	0	1
T6SS-1-2	Exp1	BHIA	9	2	76000	2850000	0	1
T6SS-1-2	Exp1	BHIA	10	2	32	1200	0	1
pilE	Exp1	BHIA	1	0	0	75	0	1
pilE	Exp1	BHIA	2	0	0	75	0	1
pilE	Exp1	BHIA	3	0	0	75	0	1
pilE	Exp1	BHIA	4	0	0	75	0	1
pilE	Exp1	BHIA	5	0	0	75	0	1
pilE	Exp1	BHIA	6	0	0	75	0	1
pilE	Exp1	BHIA	7	0	0	75	0	1
pilE	Exp1	BHIA	8	0	0	75	0	1
pilE	Exp1	BHIA	9	2	40000	1500000	0	1
pilE	Exp1	BHIA	10	0	0	75	0	1
apeA-R	Exp1	BHIA	1	2	102000	3825000	1	1
apeA-R	Exp1	BHIA	2	0	0	75	0	1
apeA-R	Exp1	BHIA	3	2	150	5625	0	1
apeA-R	Exp1	BHIA	4	2	216000	8100000	1	1
apeA-R	Exp1	BHIA	5	0	0	75	0	1
apeA-R	Exp1	BHIA	6	2	224000	8400000	1	1
apeA-R	Exp1	BHIA	7	2	222000	8325000	1	1
apeA-R	Exp1	BHIA	8	2	146	5475	0	1
apeA-R	Exp1	BHIA	9	1	1	75	0	1
apeA-R	Exp1	BHIA	10	1	1	75	0	1
wt	Exp2	BHIA	1	3	883568	22089200	1	0
wt	Exp2	BHIA	2	3	605052	15126300	1	0
wt	Exp2	BHIA	3	2	153664	5762400	1	0
wt	Exp2	BHIA	4	2	100842	3781575	1	0
wt	Exp2	BHIA	5	3	549829	13745725	1	0
wt	Exp2	BHIA	6	3	590646	14766150	1	0
wt	Exp2	BHIA	7	2	230496	8643600	1	0
wt	Exp2	BHIA	8	3	242501	6062525	1	0
ihfA*	Exp2	BHIA	1	3	889	22225	0	0
ihfA*	Exp2	BHIA	2	0	0	75	0	0
ihfA*	Exp2	BHIA	3	3	48706	1217650	0	0
ihfA*	Exp2	BHIA	4	2	784	29400	0	0
ihfA*	Exp2	BHIA	5	0	0	75	0	0
ihfA*	Exp2	BHIA	6	2	511	19162.5	0	0
ihfA*	Exp2	BHIA	7	0	0	75	0	0
ihfA*	Exp2	BHIA	8	2	4165	156188	0	0
ihfA*	Exp2	BHIA	9	0	0	75	0	0
ihfA*	Exp2	BHIA	10	0	0	75	0	0
clbB	Exp2	BHIA	1	2	131000	4912500	1	0
clbB	Exp2	BHIA	2	3	44500	1112500	1	0
clbB	Exp2	BHIA	3	2	64000	2400000	1	0
clbB	Exp2	BHIA	4	3	189000	4725000	1	0
clbB	Exp2	BHIA	5	2	15800	592500	1	0
clbB	Exp2	BHIA	6	3	45500	1137500	1	0
clbB	Exp2	BHIA	7	2	50000	1875000	1	0
clbB	Exp2	BHIA	8	2	98000	3675000	1	0
clbB	Exp2	BHIA	9	2	290000	10875000	1	0
clbB	Exp2	BHIA	10	2	77000	2887500	1	0
T6SS-1	Exp2	BHIA	1	2	299000	11212500	0	0
T6SS-1	Exp2	BHIA	2	2	1500000	56250000	1	0
T6SS-1	Exp2	BHIA	3	2	324000	12150000	0	0
T6SS-1	Exp2	BHIA	4	0	0	75	0	0
T6SS-1	Exp2	BHIA	5	3	451000	11275000	1	0
T6SS-1	Exp2	BHIA	6	3	769000	19225000	1	0
T6SS-1	Exp2	BHIA	7	2	271000	10162500	1	0
T6SS-1	Exp2	BHIA	8	3	1016	25400	0	0
T6SS-1	Exp2	BHIA	9	3	633000	15825000	1	0
T6SS-1	Exp2	BHIA	10	2	1450	54375	0	0
T6SS-2	Exp2	BHIA	1	2	218000	8175000	0	0
T6SS-2	Exp2	BHIA	2	3	435000	10875000	0	0
T6SS-2	Exp2	BHIA	3	2	122000	4575000	0	0
T6SS-2	Exp2	BHIA	4	2	186000	6975000	0	0
T6SS-2	Exp2	BHIA	5	2	160000	6000000	0	0
T6SS-2	Exp2	BHIA	6	2	80000	3000000	0	0
T6SS-2	Exp2	BHIA	7	2	62000	2325000	0	0
T6SS-2	Exp2	BHIA	8	2	72000	2700000	0	0
T6SS-2	Exp2	BHIA	9	2	71000	2662500	0	0
T6SS-2	Exp2	BHIA	10	2	26000	975000	0	0
T6SS-1-2	Exp2	BHIA	1	2	30000	1125000	0	0
T6SS-1-2	Exp2	BHIA	2	3	200000	5000000	0	0
T6SS-1-2	Exp2	BHIA	3	2	55000	2062500	0	0
T6SS-1-2	Exp2	BHIA	4	0	0	75	0	0
T6SS-1-2	Exp2	BHIA	5	2	114000	4275000	0	0
T6SS-1-2	Exp2	BHIA	6	2	460000	17250000	0	0
T6SS-1-2	Exp2	BHIA	7	0	0	75	0	0
T6SS-1-2	Exp2	BHIA	8	3	67000	1675000	0	0
T6SS-1-2	Exp2	BHIA	9	2	480000	18000000	0	0
T6SS-1-2	Exp2	BHIA	10	3	66600	1665000	0	0
pilE	Exp2	BHIA	1	3	725000	18125000	0	0
pilE	Exp2	BHIA	2	0	0	75	0	0
pilE	Exp2	BHIA	3	2	12000	450000	0	0
pilE	Exp2	BHIA	4	0	0	75	0	0
pilE	Exp2	BHIA	5	0	0	75	0	0
pilE	Exp2	BHIA	6	0	0	75	0	0
pilE	Exp2	BHIA	7	0	0	75	0	0
pilE	Exp2	BHIA	8	3	62800	1570000	0	0
pilE	Exp2	BHIA	9	0	0	75	0	0
pilE	Exp2	BHIA	10	3	29500	737500	0	0
apeA-R	Exp2	BHIA	1	2	141000	5287500	1	0
apeA-R	Exp2	BHIA	2	2	7700	288750	0	0
apeA-R	Exp2	BHIA	3	2	88000	3300000	1	0
apeA-R	Exp2	BHIA	4	2	86000	3225000	1	0
apeA-R	Exp2	BHIA	5	0	0	75	0	0
apeA-R	Exp2	BHIA	6	0	0	75	0	0
apeA-R	Exp2	BHIA	7	3	341000	8525000	1	0
apeA-R	Exp2	BHIA	8	0	0	75	0	0
apeA-R	Exp2	BHIA	9	0	0	75	0	0
apeA-R	Exp2	BHIA	10	2	347000	13012500	1	0

## Sheet: Fig 6 - fig sup 2, growth curv
Time	T° 600	A1	A2	A3	A4	A5	A6	A7	A8	A9	A10	A11	A12	B1	B2	B3	B4	B5	B6	B7	B8	B9	B10	B11	B12	C1	C2	C3	C4	C5	C6	C7	C8	C9	C10	C11	C12	D1	D2	D3	D4	D5	D6	D7	D8	D9	D10	D11	D12
00:19:16	35.0	0.0853	0.1233	0.1199	0.1205	0.1207	0.1092	0.1261	0.1248	0.1224	0.1236	0.0955	0.0836	0.0870	0.1120	0.1125	0.1104	0.1093	0.1081	0.1100	0.1157	0.1113	0.1107	0.0928	0.0835	0.0849	0.1255	0.1307	0.1317	0.1294	0.1088	0.1791	0.1215	0.1196	0.1185	0.0911	0.1085	0.0836	0.1082	0.1086	0.1141	0.1096	0.1102	0.1128	0.1095	0.1103	0.1103	0.0913	0.1094
00:39:16	35.0	0.0852	0.1227	0.1195	0.1200	0.1200	0.1089	0.1213	0.1234	0.1210	0.1221	0.0950	0.0833	0.0870	0.1117	0.1121	0.1101	0.1090	0.1078	0.1095	0.1154	0.1108	0.1100	0.0926	0.0835	0.0849	0.1256	0.1308	0.1323	0.1292	0.1084	0.1475	0.1211	0.1190	0.1180	0.0910	0.1082	0.0836	0.1078	0.1083	0.1138	0.1092	0.1097	0.1122	0.1091	0.1098	0.1089	0.0912	0.1091
00:59:16	35.0	0.0852	0.1227	0.1196	0.1198	0.1199	0.1089	0.1210	0.1234	0.1207	0.1220	0.0951	0.0836	0.0870	0.1118	0.1124	0.1101	0.1092	0.1077	0.1094	0.1153	0.1107	0.1101	0.0927	0.0836	0.0850	0.1264	0.1311	0.1343	0.1293	0.1083	0.1369	0.1209	0.1186	0.1178	0.0910	0.1083	0.0836	0.1078	0.1083	0.1138	0.1092	0.1097	0.1121	0.1090	0.1096	0.1090	0.0912	0.1091
01:19:16	35.0	0.0852	0.1225	0.1196	0.1198	0.1195	0.1088	0.1221	0.1235	0.1207	0.1222	0.0949	0.0833	0.0869	0.1116	0.1124	0.1098	0.1090	0.1075	0.1091	0.1150	0.1104	0.1099	0.0925	0.0834	0.0848	0.1265	0.1321	0.1377	0.1315	0.1082	0.1418	0.1215	0.1183	0.1179	0.0909	0.1080	0.0835	0.1077	0.1082	0.1135	0.1090	0.1095	0.1120	0.1088	0.1095	0.1088	0.0910	0.1090
01:39:16	35.0	0.0852	0.1229	0.1201	0.1200	0.1198	0.1089	0.1225	0.1235	0.1209	0.1225	0.0949	0.0835	0.0871	0.1118	0.1124	0.1100	0.1092	0.1076	0.1092	0.1151	0.1106	0.1098	0.0928	0.0835	0.0851	0.1273	0.1315	0.1403	0.1302	0.1083	0.1445	0.1224	0.1185	0.1181	0.0909	0.1082	0.0836	0.1079	0.1083	0.1137	0.1090	0.1096	0.1120	0.1088	0.1095	0.1088	0.0913	0.1091
01:59:16	35.0	0.0850	0.1229	0.1201	0.1198	0.1195	0.1087	0.1227	0.1290	0.1206	0.1225	0.0946	0.0833	0.0869	0.1116	0.1123	0.1096	0.1089	0.1074	0.1090	0.1150	0.1103	0.1097	0.0924	0.0833	0.0848	0.1272	0.1312	0.1396	0.1293	0.1080	0.1436	0.1211	0.1184	0.1180	0.0906	0.1081	0.0832	0.1076	0.1080	0.1133	0.1089	0.1094	0.1117	0.1086	0.1093	0.1086	0.0909	0.1089
02:19:16	35.0	0.0853	0.1233	0.1203	0.1204	0.1197	0.1089	0.1228	0.1249	0.1210	0.1230	0.0947	0.0834	0.0871	0.1117	0.1125	0.1099	0.1091	0.1076	0.1091	0.1150	0.1106	0.1099	0.0926	0.0835	0.0851	0.1280	0.1320	0.1427	0.1298	0.1083	0.1920	0.1207	0.1186	0.1179	0.0909	0.1082	0.0836	0.1079	0.1083	0.1136	0.1090	0.1097	0.1120	0.1090	0.1095	0.1089	0.0911	0.1090
02:39:16	35.0	0.0852	0.1235	0.1205	0.1203	0.1198	0.1089	0.1230	0.1255	0.1211	0.1235	0.0949	0.0834	0.0871	0.1118	0.1125	0.1099	0.1089	0.1075	0.1091	0.1149	0.1105	0.1099	0.0926	0.0835	0.0849	0.1280	0.1316	0.1396	0.1295	0.1084	0.2007	0.1209	0.1187	0.1184	0.0909	0.1083	0.0836	0.1078	0.1082	0.1134	0.1090	0.1095	0.1120	0.1088	0.1094	0.1088	0.0911	0.1091
02:59:16	35.0	0.0852	0.1235	0.1206	0.1203	0.1200	0.1089	0.1234	0.1260	0.1211	0.1236	0.0947	0.0834	0.0869	0.1117	0.1124	0.1099	0.1089	0.1074	0.1090	0.1149	0.1105	0.1098	0.0926	0.0834	0.0850	0.1283	0.1315	0.1391	0.1295	0.1084	0.2063	0.1210	0.1185	0.1181	0.0908	0.1087	0.0835	0.1080	0.1082	0.1135	0.1090	0.1096	0.1120	0.1088	0.1094	0.1088	0.0911	0.1090
03:19:16	35.0	0.0852	0.1238	0.1208	0.1206	0.1202	0.1089	0.1257	0.1254	0.1213	0.1238	0.0932	0.0834	0.0869	0.1117	0.1125	0.1099	0.1090	0.1074	0.1091	0.1149	0.1105	0.1100	0.0926	0.0835	0.0850	0.1287	0.1314	0.1413	0.1297	0.1084	0.1313	0.1212	0.1186	0.1181	0.0908	0.1082	0.0835	0.1079	0.1083	0.1134	0.1090	0.1095	0.1121	0.1089	0.1094	0.1089	0.0910	0.1091
03:39:16	35.0	0.0852	0.1241	0.1211	0.1209	0.1205	0.1089	0.1262	0.1259	0.1215	0.1239	0.0931	0.0834	0.0868	0.1117	0.1123	0.1102	0.1089	0.1074	0.1090	0.1149	0.1103	0.1099	0.0925	0.0835	0.0849	0.1288	0.1316	0.1400	0.1299	0.1085	0.1389	0.1210	0.1187	0.1185	0.0908	0.1082	0.0835	0.1079	0.1082	0.1135	0.1090	0.1096	0.1119	0.1089	0.1093	0.1088	0.0910	0.1090
03:59:16	35.0	0.0852	0.1245	0.1214	0.1210	0.1207	0.1088	0.1257	0.1287	0.1220	0.1247	0.0930	0.0835	0.0869	0.1117	0.1124	0.1098	0.1089	0.1075	0.1090	0.1149	0.1104	0.1099	0.0924	0.0834	0.0849	0.1292	0.1314	0.1389	0.1301	0.1083	0.1507	0.1210	0.1189	0.1184	0.0908	0.1082	0.0835	0.1080	0.1082	0.1134	0.1089	0.1096	0.1119	0.1089	0.1093	0.1088	0.0911	0.1090
04:19:16	35.0	0.0852	0.1249	0.1220	0.1215	0.1213	0.1089	0.1253	0.1280	0.1224	0.1248	0.0931	0.0833	0.0868	0.1118	0.1124	0.1099	0.1090	0.1075	0.1091	0.1149	0.1104	0.1099	0.0924	0.0834	0.0850	0.1290	0.1320	0.1379	0.1297	0.1084	0.1984	0.1214	0.1192	0.1185	0.0908	0.1083	0.0835	0.1080	0.1083	0.1134	0.1096	0.1096	0.1120	0.1089	0.1094	0.1088	0.0910	0.1090
04:39:16	35.0	0.0851	0.1253	0.1224	0.1221	0.1216	0.1089	0.1257	0.1276	0.1226	0.1255	0.0931	0.0833	0.0870	0.1118	0.1124	0.1098	0.1090	0.1074	0.1090	0.1149	0.1104	0.1099	0.0924	0.0833	0.0849	0.1289	0.1319	0.1359	0.1294	0.1083	0.2459	0.1213	0.1192	0.1187	0.0907	0.1081	0.0835	0.1079	0.1082	0.1134	0.1092	0.1097	0.1119	0.1089	0.1094	0.1088	0.0909	0.1090
04:59:16	35.0	0.0851	0.1259	0.1230	0.1226	0.1222	0.1090	0.1268	0.1278	0.1232	0.1258	0.0931	0.0835	0.0869	0.1120	0.1125	0.1099	0.1091	0.1076	0.1092	0.1149	0.1105	0.1102	0.0925	0.0835	0.0849	0.1290	0.1323	0.1370	0.1296	0.1086	0.2029	0.1217	0.1197	0.1190	0.0909	0.1083	0.0835	0.1080	0.1083	0.1136	0.1104	0.1097	0.1120	0.1089	0.1094	0.1089	0.0911	0.1091
05:19:16	35.0	0.0852	0.1265	0.1237	0.1233	0.1229	0.1089	0.1297	0.1282	0.1234	0.1260	0.0930	0.0834	0.0870	0.1119	0.1125	0.1099	0.1090	0.1074	0.1091	0.1148	0.1105	0.1099	0.0924	0.0834	0.0849	0.1289	0.1319	0.1373	0.1297	0.1086	0.1917	0.1219	0.1196	0.1195	0.0908	0.1082	0.0834	0.1080	0.1082	0.1135	0.1113	0.1096	0.1120	0.1089	0.1094	0.1090	0.0910	0.1091
05:39:16	35.0	0.0851	0.1273	0.1245	0.1240	0.1238	0.1089	0.1276	0.1280	0.1240	0.1265	0.0930	0.0834	0.0870	0.1120	0.1125	0.1100	0.1091	0.1077	0.1092	0.1148	0.1104	0.1099	0.0924	0.0835	0.0849	0.1289	0.1317	0.1383	0.1296	0.1085	0.2130	0.1223	0.1202	0.1192	0.0908	0.1082	0.0835	0.1080	0.1083	0.1135	0.1091	0.1097	0.1121	0.1089	0.1094	0.1089	0.0909	0.1090
05:59:16	35.0	0.0852	0.1283	0.1255	0.1251	0.1249	0.1089	0.1284	0.1344	0.1245	0.1274	0.0930	0.0834	0.0870	0.1120	0.1125	0.1100	0.1091	0.1076	0.1091	0.1150	0.1105	0.1100	0.0924	0.0835	0.0849	0.1292	0.1318	0.1381	0.1298	0.1085	0.1491	0.1227	0.1204	0.1199	0.0908	0.1083	0.0835	0.1080	0.1083	0.1134	0.1090	0.1098	0.1121	0.1091	0.1094	0.1090	0.0912	0.1090
06:19:16	35.0	0.0852	0.1297	0.1267	0.1262	0.1261	0.1091	0.1295	0.1318	0.1253	0.1283	0.0930	0.0835	0.0869	0.1120	0.1127	0.1099	0.1092	0.1078	0.1092	0.1148	0.1104	0.1099	0.0924	0.0835	0.0849	0.1294	0.1319	0.1382	0.1298	0.1085	0.1345	0.1231	0.1206	0.1200	0.0908	0.1084	0.0835	0.1081	0.1084	0.1135	0.1091	0.1096	0.1121	0.1090	0.1094	0.1090	0.0910	0.1091
06:39:16	35.0	0.0851	0.1309	0.1282	0.1277	0.1274	0.1090	0.1312	0.1320	0.1260	0.1291	0.0928	0.0834	0.0870	0.1119	0.1126	0.1100	0.1091	0.1076	0.1091	0.1147	0.1104	0.1099	0.0923	0.0835	0.0849	0.1291	0.1320	0.1380	0.1297	0.1084	0.1224	0.1239	0.1224	0.1204	0.0908	0.1085	0.0836	0.1082	0.1083	0.1134	0.1091	0.1097	0.1121	0.1090	0.1094	0.1090	0.0910	0.1091
06:59:16	35.0	0.0850	0.1326	0.1302	0.1291	0.1289	0.1088	0.1347	0.1347	0.1270	0.1297	0.0928	0.0833	0.0867	0.1119	0.1124	0.1099	0.1091	0.1074	0.1090	0.1147	0.1103	0.1098	0.0922	0.0833	0.0848	0.1289	0.1323	0.1381	0.1297	0.1084	0.1345	0.1245	0.1223	0.1209	0.0906	0.1082	0.0833	0.1079	0.1083	0.1135	0.1102	0.1097	0.1120	0.1088	0.1093	0.1087	0.0909	0.1090
07:19:16	35.0	0.0851	0.1350	0.1322	0.1314	0.1310	0.1089	0.1340	0.1339	0.1277	0.1312	0.0928	0.0834	0.0869	0.1120	0.1126	0.1101	0.1092	0.1077	0.1092	0.1148	0.1104	0.1101	0.0924	0.0834	0.0850	0.1289	0.1322	0.1377	0.1301	0.1086	0.1380	0.1257	0.1231	0.1217	0.0909	0.1083	0.0835	0.1082	0.1084	0.1135	0.1092	0.1097	0.1121	0.1091	0.1095	0.1090	0.0910	0.1091
07:39:16	35.0	0.0850	0.1375	0.1345	0.1338	0.1333	0.1089	0.1351	0.1343	0.1289	0.1320	0.0928	0.0834	0.0869	0.1119	0.1126	0.1100	0.1091	0.1077	0.1091	0.1148	0.1104	0.1099	0.0922	0.0834	0.0849	0.1290	0.1324	0.1388	0.1300	0.1085	0.1402	0.1259	0.1229	0.1227	0.0907	0.1082	0.0835	0.1081	0.1083	0.1134	0.1090	0.1097	0.1121	0.1087	0.1095	0.1091	0.0910	0.1090
07:59:16	35.0	0.0850	0.1406	0.1374	0.1364	0.1360	0.1089	0.1372	0.1349	0.1300	0.1336	0.0927	0.0834	0.0868	0.1120	0.1126	0.1101	0.1093	0.1076	0.1092	0.1148	0.1104	0.1100	0.0922	0.0834	0.0849	0.1288	0.1323	0.1394	0.1301	0.1086	0.1405	0.1269	0.1240	0.1236	0.0907	0.1083	0.0834	0.1080	0.1083	0.1135	0.1122	0.1098	0.1121	0.1089	0.1095	0.1091	0.0910	0.1092
08:19:16	35.0	0.0851	0.1442	0.1407	0.1397	0.1393	0.1089	0.1399	0.1365	0.1314	0.1349	0.0928	0.0834	0.0868	0.1120	0.1126	0.1100	0.1092	0.1076	0.1090	0.1149	0.1104	0.1100	0.0925	0.0834	0.0848	0.1291	0.1321	0.1391	0.1305	0.1086	0.1381	0.1286	0.1252	0.1245	0.0907	0.1082	0.0834	0.1082	0.1083	0.1133	0.1091	0.1098	0.1121	0.1090	0.1094	0.1090	0.0909	0.1091
08:39:16	35.0	0.0850	0.1484	0.1447	0.1434	0.1433	0.1088	0.1425	0.1382	0.1328	0.1364	0.0927	0.0833	0.0870	0.1120	0.1127	0.1101	0.1092	0.1076	0.1092	0.1149	0.1103	0.1100	0.0922	0.0833	0.0850	0.1291	0.1324	0.1338	0.1305	0.1085	0.1376	0.1296	0.1265	0.1261	0.0907	0.1082	0.0834	0.1082	0.1084	0.1134	0.1092	0.1097	0.1121	0.1089	0.1094	0.1091	0.0911	0.1091
08:59:16	35.0	0.0849	0.1536	0.1495	0.1486	0.1477	0.1089	0.1443	0.1436	0.1340	0.1383	0.0926	0.0833	0.0868	0.1120	0.1125	0.1098	0.1092	0.1076	0.1092	0.1147	0.1102	0.1100	0.0922	0.0832	0.0848	0.1293	0.1325	0.1335	0.1307	0.1085	0.1406	0.1315	0.1282	0.1278	0.0907	0.1083	0.0834	0.1081	0.1083	0.1133	0.1098	0.1097	0.1120	0.1090	0.1095	0.1090	0.0909	0.1091
09:19:16	35.0	0.0851	0.1587	0.1551	0.1536	0.1529	0.1089	0.1477	0.1482	0.1358	0.1398	0.0927	0.0834	0.0869	0.1121	0.1127	0.1103	0.1092	0.1076	0.1093	0.1149	0.1105	0.1102	0.0922	0.0834	0.0848	0.1295	0.1327	0.1344	0.1311	0.1086	0.1444	0.1339	0.1303	0.1297	0.0908	0.1084	0.0833	0.1082	0.1085	0.1135	0.1092	0.1098	0.1121	0.1091	0.1094	0.1094	0.0910	0.1092
09:39:16	35.0	0.0850	0.1646	0.1612	0.1591	0.1588	0.1088	0.1524	0.1536	0.1374	0.1418	0.0925	0.0834	0.0868	0.1121	0.1127	0.1103	0.1092	0.1076	0.1092	0.1149	0.1104	0.1100	0.0922	0.0835	0.0849	0.1298	0.1332	0.1350	0.1315	0.1086	0.1476	0.1366	0.1326	0.1321	0.0908	0.1084	0.0835	0.1083	0.1084	0.1134	0.1092	0.1098	0.1121	0.1091	0.1095	0.1091	0.0910	0.1092
09:59:16	35.0	0.0851	0.1722	0.1680	0.1660	0.1660	0.1087	0.1547	0.1499	0.1393	0.1435	0.0926	0.0834	0.0870	0.1122	0.1126	0.1102	0.1092	0.1076	0.1093	0.1149	0.1103	0.1100	0.0922	0.0834	0.0849	0.1302	0.1338	0.1350	0.1320	0.1086	0.1514	0.1403	0.1353	0.1351	0.0908	0.1083	0.0835	0.1083	0.1084	0.1135	0.1115	0.1098	0.1122	0.1089	0.1094	0.1094	0.0910	0.1092
10:19:16	35.0	0.0850	0.1806	0.1765	0.1742	0.1741	0.1089	0.1587	0.1558	0.1416	0.1469	0.0925	0.0834	0.0869	0.1121	0.1127	0.1102	0.1092	0.1076	0.1092	0.1149	0.1105	0.1101	0.0921	0.0835	0.0848	0.1306	0.1341	0.1357	0.1324	0.1086	0.1547	0.1435	0.1388	0.1384	0.0907	0.1083	0.0834	0.1084	0.1085	0.1134	0.1094	0.1099	0.1122	0.1091	0.1095	0.1095	0.0910	0.1092
10:39:16	35.0	0.0849	0.1905	0.1863	0.1837	0.1838	0.1088	0.1632	0.1629	0.1434	0.1486	0.0924	0.0833	0.0869	0.1121	0.1126	0.1103	0.1093	0.1075	0.1092	0.1147	0.1104	0.1100	0.0919	0.0834	0.0849	0.1307	0.1345	0.1359	0.1331	0.1087	0.1596	0.1479	0.1432	0.1430	0.0907	0.1082	0.0834	0.1083	0.1084	0.1134	0.1092	0.1100	0.1122	0.1090	0.1094	0.1093	0.0909	0.1092
10:59:16	35.0	0.0851	0.2026	0.1980	0.1949	0.1948	0.1088	0.1682	0.1532	0.1460	0.1512	0.0925	0.0833	0.0868	0.1122	0.1128	0.1104	0.1092	0.1079	0.1093	0.1148	0.1105	0.1102	0.0922	0.0835	0.0848	0.1314	0.1354	0.1367	0.1336	0.1088	0.1650	0.1535	0.1483	0.1476	0.0908	0.1083	0.0834	0.1083	0.1085	0.1135	0.1093	0.1098	0.1122	0.1090	0.1096	0.1093	0.0911	0.1093
11:19:16	35.0	0.0851	0.2164	0.2113	0.2079	0.2082	0.1089	0.1714	0.1570	0.1486	0.1539	0.0924	0.0833	0.0870	0.1123	0.1129	0.1104	0.1095	0.1078	0.1093	0.1148	0.1105	0.1102	0.0922	0.0834	0.0849	0.1320	0.1358	0.1372	0.1344	0.1088	0.1700	0.1593	0.1536	0.1530	0.0908	0.1083	0.0834	0.1084	0.1086	0.1137	0.1130	0.1100	0.1122	0.1091	0.1095	0.1094	0.0911	0.1092
11:39:16	35.0	0.0851	0.2317	0.2262	0.2222	0.2226	0.1089	0.1772	0.1630	0.1519	0.1575	0.0924	0.0834	0.0869	0.1123	0.1128	0.1104	0.1094	0.1077	0.1093	0.1149	0.1103	0.1103	0.0921	0.0834	0.0850	0.1327	0.1366	0.1382	0.1353	0.1088	0.1783	0.1662	0.1604	0.1595	0.0907	0.1083	0.0834	0.1085	0.1086	0.1135	0.1093	0.1100	0.1124	0.1095	0.1095	0.1095	0.0910	0.1093
11:59:16	35.0	0.0851	0.2472	0.2439	0.2386	0.2397	0.1090	0.1834	0.1631	0.1557	0.1608	0.0924	0.0835	0.0869	0.1124	0.1128	0.1104	0.1094	0.1078	0.1094	0.1149	0.1105	0.1102	0.0921	0.0835	0.0849	0.1337	0.1376	0.1390	0.1363	0.1088	0.1871	0.1750	0.1691	0.1676	0.0907	0.1084	0.0836	0.1084	0.1086	0.1136	0.1123	0.1099	0.1123	0.1092	0.1097	0.1093	0.0910	0.1092
12:19:16	35.0	0.0850	0.2589	0.2565	0.2506	0.2521	0.1089	0.1865	0.1655	0.1585	0.1633	0.0924	0.0835	0.0869	0.1124	0.1129	0.1105	0.1095	0.1079	0.1093	0.1151	0.1107	0.1103	0.0921	0.0834	0.0849	0.1347	0.1386	0.1404	0.1375	0.1089	0.1972	0.1852	0.1779	0.1771	0.0908	0.1084	0.0835	0.1086	0.1087	0.1136	0.1095	0.1100	0.1123	0.1092	0.1097	0.1096	0.0910	0.1093
12:39:16	35.0	0.0850	0.2695	0.2684	0.2625	0.2640	0.1089	0.1930	0.1724	0.1618	0.1671	0.0923	0.0833	0.0868	0.1123	0.1128	0.1104	0.1093	0.1077	0.1092	0.1149	0.1103	0.1100	0.0920	0.0834	0.0848	0.1358	0.1397	0.1415	0.1387	0.1088	0.2088	0.1974	0.1877	0.1876	0.0907	0.1084	0.0834	0.1084	0.1085	0.1136	0.1125	0.1099	0.1123	0.1091	0.1096	0.1093	0.0910	0.1092
12:59:16	35.0	0.0850	0.2794	0.2786	0.2728	0.2742	0.1089	0.2003	0.1762	0.1649	0.1697	0.0922	0.0833	0.0868	0.1122	0.1127	0.1105	0.1094	0.1077	0.1093	0.1149	0.1104	0.1101	0.0919	0.0835	0.0849	0.1369	0.1410	0.1428	0.1404	0.1087	0.2233	0.2115	0.1996	0.1999	0.0906	0.1084	0.0834	0.1085	0.1085	0.1134	0.1091	0.1100	0.1123	0.1092	0.1096	0.1097	0.0910	0.1091
13:19:16	35.0	0.0852	0.2879	0.2877	0.2817	0.2834	0.1090	0.2091	0.1819	0.1693	0.1757	0.0924	0.0836	0.0870	0.1126	0.1130	0.1108	0.1096	0.1080	0.1095	0.1152	0.1108	0.1104	0.0923	0.0837	0.0851	0.1387	0.1429	0.1450	0.1423	0.1090	0.2411	0.2294	0.2159	0.2141	0.0910	0.1086	0.0836	0.1087	0.1088	0.1138	0.1106	0.1103	0.1125	0.1094	0.1101	0.1101	0.0912	0.1094
13:39:16	35.0	0.0851	0.2945	0.2943	0.2889	0.2901	0.1090	0.2142	0.1867	0.1730	0.1801	0.0923	0.0834	0.0869	0.1124	0.1128	0.1105	0.1094	0.1079	0.1094	0.1150	0.1106	0.1102	0.0921	0.0835	0.0849	0.1400	0.1445	0.1464	0.1443	0.1088	0.2538	0.2431	0.2332	0.2301	0.0907	0.1084	0.0835	0.1086	0.1086	0.1137	0.1093	0.1101	0.1123	0.1093	0.1097	0.1093	0.0911	0.1093
13:59:16	35.0	0.0851	0.3007	0.3022	0.2956	0.2969	0.1089	0.2231	0.1918	0.1783	0.1827	0.0920	0.0832	0.0868	0.1124	0.1128	0.1104	0.1094	0.1078	0.1093	0.1148	0.1104	0.1101	0.0920	0.0834	0.0848	0.1421	0.1466	0.1490	0.1465	0.1088	0.2658	0.2562	0.2461	0.2443	0.0906	0.1084	0.0835	0.1085	0.1086	0.1136	0.1104	0.1100	0.1124	0.1093	0.1095	0.1095	0.0910	0.1092
14:19:16	35.0	0.0851	0.3063	0.3086	0.3012	0.3018	0.1091	0.2287	0.2163	0.1829	0.1881	0.0921	0.0834	0.0870	0.1125	0.1129	0.1103	0.1095	0.1079	0.1094	0.1151	0.1105	0.1102	0.0920	0.0835	0.0850	0.1445	0.1490	0.1518	0.1495	0.1090	0.2786	0.2685	0.2582	0.2568	0.0907	0.1085	0.0835	0.1086	0.1088	0.1137	0.1102	0.1102	0.1124	0.1094	0.1097	0.1094	0.0910	0.1093
14:39:16	35.0	0.0851	0.3116	0.3133	0.3061	0.3070	0.1089	0.2368	0.2005	0.1892	0.1934	0.0921	0.0834	0.0871	0.1127	0.1130	0.1102	0.1096	0.1080	0.1094	0.1150	0.1106	0.1104	0.0921	0.0835	0.0849	0.1473	0.1519	0.1548	0.1526	0.1090	0.2901	0.2807	0.2694	0.2675	0.0907	0.1085	0.0835	0.1087	0.1087	0.1137	0.1097	0.1102	0.1125	0.1093	0.1098	0.1094	0.0911	0.1094
14:59:16	35.0	0.0850	0.3162	0.3167	0.3112	0.3115	0.1089	0.2460	0.2109	0.1941	0.1973	0.0919	0.0832	0.0867	0.1124	0.1128	0.1102	0.1094	0.1078	0.1093	0.1150	0.1103	0.1102	0.0919	0.0833	0.0849	0.1502	0.1554	0.1585	0.1566	0.1088	0.2994	0.2903	0.2798	0.2783	0.0905	0.1083	0.0834	0.1086	0.1087	0.1137	0.1094	0.1101	0.1124	0.1093	0.1096	0.1092	0.0911	0.1093
15:19:16	35.0	0.0850	0.3216	0.3205	0.3162	0.3164	0.1088	0.2545	0.2401	0.1995	0.2033	0.0921	0.0833	0.0869	0.1125	0.1130	0.1103	0.1095	0.1079	0.1095	0.1150	0.1105	0.1103	0.0920	0.0833	0.0849	0.1574	0.1593	0.1627	0.1608	0.1089	0.3076	0.2969	0.2886	0.2891	0.0906	0.1084	0.0834	0.1086	0.1088	0.1136	0.1095	0.1101	0.1125	0.1093	0.1097	0.1098	0.0910	0.1092
15:39:16	35.0	0.0850	0.3259	0.3261	0.3204	0.3211	0.1089	0.2669	0.2394	0.2075	0.2102	0.0920	0.0834	0.0868	0.1126	0.1130	0.1102	0.1095	0.1080	0.1095	0.1150	0.1106	0.1103	0.0920	0.0834	0.0848	0.1613	0.1633	0.1674	0.1658	0.1091	0.3130	0.3025	0.2974	0.2968	0.0907	0.1085	0.0834	0.1088	0.1087	0.1137	0.1096	0.1101	0.1125	0.1093	0.1098	0.1093	0.0910	0.1092
15:59:16	35.0	0.0850	0.3284	0.3313	0.3231	0.3235	0.1090	0.2721	0.2460	0.2116	0.2140	0.0920	0.0834	0.0870	0.1127	0.1130	0.1103	0.1096	0.1081	0.1094	0.1150	0.1105	0.1103	0.0920	0.0835	0.0849	0.1661	0.1683	0.1731	0.1719	0.1091	0.3195	0.3074	0.3030	0.3037	0.0908	0.1085	0.0834	0.1087	0.1088	0.1138	0.1095	0.1102	0.1124	0.1094	0.1098	0.1093	0.0911	0.1093
16:19:16	35.0	0.0853	0.3293	0.3327	0.3247	0.3252	0.1090	0.2800	0.2241	0.2161	0.2192	0.0921	0.0835	0.0870	0.1127	0.1131	0.1103	0.1096	0.1080	0.1096	0.1150	0.1106	0.1105	0.0920	0.0836	0.0849	0.1720	0.1746	0.1805	0.1795	0.1091	0.3245	0.3115	0.3066	0.3081	0.0906	0.1087	0.0835	0.1088	0.1089	0.1138	0.1096	0.1103	0.1127	0.1095	0.1098	0.1095	0.0911	0.1094
16:39:16	35.0	0.0851	0.3291	0.3324	0.3241	0.3255	0.1089	0.2881	0.2361	0.2189	0.2219	0.0920	0.0834	0.0869	0.1125	0.1131	0.1103	0.1095	0.1079	0.1095	0.1150	0.1106	0.1104	0.0920	0.0835	0.0849	0.1793	0.1822	0.1889	0.1886	0.1090	0.3310	0.3194	0.3117	0.3156	0.0907	0.1085	0.0835	0.1089	0.1089	0.1139	0.1096	0.1102	0.1124	0.1094	0.1097	0.1098	0.0911	0.1094
16:59:16	35.0	0.0851	0.3273	0.3302	0.3233	0.3250	0.1090	0.2932	0.2381	0.2231	0.2268	0.0919	0.0833	0.0869	0.1127	0.1130	0.1103	0.1096	0.1081	0.1096	0.1150	0.1106	0.1104	0.0919	0.0834	0.0849	0.1882	0.1913	0.1987	0.1992	0.1092	0.3379	0.3264	0.3179	0.3200	0.0907	0.1085	0.0834	0.1087	0.1088	0.1137	0.1096	0.1101	0.1125	0.1094	0.1098	0.1094	0.0911	0.1094
17:19:16	35.0	0.0851	0.3266	0.3311	0.3225	0.3242	0.1090	0.2998	0.2404	0.2276	0.2294	0.0920	0.0834	0.0869	0.1126	0.1131	0.1103	0.1097	0.1080	0.1095	0.1150	0.1106	0.1104	0.0920	0.0835	0.0850	0.1993	0.2020	0.2109	0.2116	0.1090	0.3425	0.3307	0.3249	0.3244	0.0907	0.1086	0.0835	0.1088	0.1089	0.1139	0.1096	0.1103	0.1127	0.1095	0.1098	0.1096	0.0910	0.1095
17:39:16	35.0	0.0851	0.3260	0.3300	0.3224	0.3249	0.1089	0.3051	0.2497	0.2326	0.2337	0.0918	0.0834	0.0868	0.1126	0.1131	0.1103	0.1096	0.1080	0.1095	0.1150	0.1105	0.1104	0.0918	0.0834	0.0848	0.2114	0.2150	0.2243	0.2254	0.1090	0.3456	0.3317	0.3276	0.3277	0.0906	0.1085	0.0834	0.1088	0.1089	0.1137	0.1096	0.1103	0.1125	0.1094	0.1098	0.1094	0.0911	0.1094
17:59:16	35.0	0.0850	0.3260	0.3297	0.3231	0.3253	0.1089	0.3083	0.2534	0.2373	0.2384	0.0917	0.0834	0.0869	0.1125	0.1130	0.1103	0.1095	0.1079	0.1094	0.1150	0.1106	0.1102	0.0918	0.0834	0.0848	0.2267	0.2292	0.2415	0.2423	0.1090	0.3477	0.3341	0.3291	0.3298	0.0906	0.1085	0.0835	0.1088	0.1088	0.1137	0.1095	0.1102	0.1125	0.1094	0.1097	0.1094	0.0910	0.1094
18:19:16	35.0	0.0850	0.3265	0.3295	0.3249	0.3248	0.1089	0.3137	0.2540	0.2406	0.2393	0.0917	0.0833	0.0868	0.1126	0.1130	0.1102	0.1096	0.1082	0.1094	0.1149	0.1105	0.1103	0.0919	0.0834	0.0848	0.2428	0.2451	0.2582	0.2555	0.1090	0.3486	0.3327	0.3287	0.3326	0.0907	0.1086	0.0834	0.1089	0.1089	0.1137	0.1095	0.1103	0.1126	0.1094	0.1098	0.1093	0.0910	0.1099
18:39:16	35.0	0.0850	0.3279	0.3295	0.3247	0.3257	0.1090	0.3215	0.2610	0.2436	0.2431	0.0918	0.0833	0.0868	0.1126	0.1130	0.1102	0.1095	0.1079	0.1094	0.1150	0.1105	0.1103	0.0918	0.0835	0.0847	0.2550	0.2582	0.2730	0.2706	0.1091	0.3500	0.3329	0.3286	0.3330	0.0906	0.1085	0.0834	0.1087	0.1088	0.1136	0.1096	0.1101	0.1125	0.1094	0.1098	0.1093	0.0909	0.1100
18:59:16	35.0	0.0849	0.3286	0.3310	0.3261	0.3271	0.1088	0.3278	0.2615	0.2470	0.2464	0.0915	0.0833	0.0868	0.1126	0.1130	0.1101	0.1096	0.1079	0.1094	0.1150	0.1105	0.1102	0.0917	0.0834	0.0847	0.2710	0.2724	0.2876	0.2858	0.1090	0.3501	0.3303	0.3279	0.3326	0.0905	0.1085	0.0833	0.1087	0.1088	0.1138	0.1095	0.1102	0.1125	0.1093	0.1097	0.1092	0.0909	0.1093
19:19:16	35.0	0.0851	0.3300	0.3324	0.3281	0.3277	0.1089	0.3338	0.2654	0.2493	0.2496	0.0915	0.0835	0.0870	0.1127	0.1132	0.1105	0.1096	0.1081	0.1094	0.1150	0.1105	0.1104	0.0919	0.0834	0.0848	0.2847	0.2863	0.2980	0.2992	0.1091	0.3502	0.3326	0.3276	0.3332	0.0905	0.1086	0.0834	0.1090	0.1089	0.1138	0.1097	0.1104	0.1126	0.1095	0.1099	0.1095	0.0911	0.1100
19:39:16	35.0	0.0850	0.3321	0.3363	0.3295	0.3327	0.1089	0.3388	0.2673	0.2498	0.2520	0.0915	0.0833	0.0869	0.1126	0.1132	0.1103	0.1096	0.1079	0.1095	0.1150	0.1106	0.1103	0.0917	0.0833	0.0848	0.2957	0.2991	0.3127	0.3051	0.1091	0.3512	0.3309	0.3262	0.3334	0.0906	0.1084	0.0834	0.1087	0.1089	0.1138	0.1135	0.1103	0.1125	0.1093	0.1098	0.1095	0.0909	0.1097
19:59:16	35.0	0.0850	0.3355	0.3394	0.3329	0.3344	0.1089	0.3439	0.2694	0.2528	0.2551	0.0916	0.0834	0.0869	0.1127	0.1132	0.1103	0.1095	0.1080	0.1095	0.1150	0.1105	0.1104	0.0918	0.0835	0.0848	0.3068	0.3104	0.3208	0.3136	0.1092	0.3542	0.3297	0.3257	0.3347	0.0906	0.1085	0.0834	0.1088	0.1089	0.1137	0.1096	0.1103	0.1125	0.1095	0.1099	0.1094	0.0910	0.1094
20:19:16	35.0	0.0850	0.3435	0.3432	0.3385	0.3404	0.1088	0.3473	0.2725	0.2554	0.2543	0.0914	0.0832	0.0867	0.1125	0.1131	0.1103	0.1094	0.1079	0.1095	0.1149	0.1105	0.1103	0.0917	0.0833	0.0848	0.3142	0.3188	0.3300	0.3204	0.1091	0.3567	0.3336	0.3274	0.3321	0.0904	0.1085	0.0834	0.1088	0.1089	0.1137	0.1096	0.1102	0.1125	0.1094	0.1097	0.1094	0.0908	0.1094
20:39:16	35.0	0.0851	0.3506	0.3521	0.3485	0.3508	0.1089	0.3479	0.2760	0.2573	0.2568	0.0914	0.0833	0.0869	0.1127	0.1132	0.1103	0.1097	0.1082	0.1096	0.1151	0.1106	0.1103	0.0917	0.0835	0.0849	0.3220	0.3250	0.3402	0.3273	0.1091	0.3605	0.3357	0.3262	0.3364	0.0906	0.1086	0.0834	0.1089	0.1090	0.1138	0.1111	0.1104	0.1126	0.1095	0.1098	0.1094	0.0910	0.1093
20:59:16	35.0	0.0850	0.3539	0.3593	0.3543	0.3559	0.1089	0.3513	0.2773	0.2588	0.2590	0.0914	0.0833	0.0867	0.1127	0.1131	0.1102	0.1096	0.1080	0.1095	0.1150	0.1106	0.1103	0.0917	0.0834	0.0848	0.3268	0.3339	0.3398	0.3318	0.1091	0.3654	0.3374	0.3298	0.3403	0.0905	0.1086	0.0834	0.1089	0.1089	0.1138	0.1097	0.1103	0.1126	0.1094	0.1098	0.1096	0.0909	0.1093
21:19:16	35.0	0.0850	0.3550	0.3611	0.3553	0.3589	0.1089	0.3502	0.2795	0.2628	0.2611	0.0913	0.0834	0.0868	0.1126	0.1132	0.1104	0.1098	0.1080	0.1095	0.1151	0.1106	0.1103	0.0916	0.0833	0.0849	0.3335	0.3435	0.3505	0.3381	0.1091	0.3710	0.3391	0.3334	0.3420	0.0905	0.1086	0.0834	0.1090	0.1090	0.1139	0.1096	0.1104	0.1127	0.1096	0.1100	0.1095	0.0911	0.1094
21:39:16	35.0	0.0851	0.3554	0.3619	0.3553	0.3588	0.1090	0.3525	0.2805	0.2630	0.2629	0.0914	0.0834	0.0870	0.1128	0.1133	0.1105	0.1096	0.1082	0.1096	0.1150	0.1107	0.1105	0.0917	0.0835	0.0848	0.3337	0.3481	0.3527	0.3452	0.1093	0.3788	0.3450	0.3359	0.3479	0.0907	0.1087	0.0835	0.1090	0.1091	0.1139	0.1097	0.1106	0.1127	0.1096	0.1098	0.1095	0.0911	0.1094
21:59:16	34.9	0.0850	0.3556	0.3620	0.3561	0.3601	0.1090	0.3575	0.2841	0.2649	0.2638	0.0914	0.0835	0.0870	0.1127	0.1133	0.1105	0.1097	0.1081	0.1096	0.1149	0.1107	0.1105	0.0917	0.0835	0.0848	0.3376	0.3484	0.3573	0.3479	0.1093	0.3931	0.3560	0.3424	0.3559	0.0905	0.1086	0.0834	0.1090	0.1089	0.1138	0.1106	0.1104	0.1128	0.1096	0.1098	0.1096	0.0911	0.1095
22:19:16	35.0	0.0851	0.3563	0.3622	0.3566	0.3598	0.1090	0.3605	0.2849	0.2669	0.2669	0.0912	0.0833	0.0868	0.1127	0.1133	0.1104	0.1098	0.1082	0.1096	0.1151	0.1106	0.1105	0.0917	0.0834	0.0848	0.3416	0.3525	0.3613	0.3528	0.1093	0.4024	0.3636	0.3528	0.3694	0.0907	0.1086	0.0834	0.1091	0.1090	0.1139	0.1098	0.1105	0.1128	0.1096	0.1098	0.1095	0.0910	0.1094
22:39:16	35.0	0.0850	0.3577	0.3627	0.3564	0.3603	0.1090	0.3625	0.2877	0.2684	0.2677	0.0913	0.0833	0.0870	0.1127	0.1133	0.1104	0.1096	0.1081	0.1095	0.1151	0.1106	0.1105	0.0916	0.0834	0.0848	0.3451	0.3591	0.3643	0.3532	0.1092	0.4047	0.3660	0.3613	0.3754	0.0906	0.1085	0.0834	0.1089	0.1091	0.1139	0.1097	0.1104	0.1127	0.1096	0.1098	0.1096	0.0909	0.1094
22:59:16	35.0	0.0851	0.3589	0.3629	0.3579	0.3599	0.1089	0.3682	0.2904	0.2694	0.2680	0.0912	0.0835	0.0869	0.1127	0.1133	0.1104	0.1097	0.1081	0.1096	0.1151	0.1106	0.1104	0.0917	0.0834	0.0848	0.3471	0.3587	0.3646	0.3490	0.1092	0.4082	0.3672	0.3630	0.3772	0.0905	0.1086	0.0835	0.1091	0.1090	0.1139	0.1099	0.1104	0.1127	0.1097	0.1099	0.1096	0.0910	0.1095
23:19:16	35.0	0.0851	0.3604	0.3638	0.3588	0.3614	0.1090	0.3707	0.2913	0.2710	0.2701	0.0912	0.0834	0.0868	0.1127	0.1133	0.1105	0.1098	0.1081	0.1097	0.1150	0.1107	0.1104	0.0918	0.0834	0.0848	0.3483	0.3599	0.3654	0.3501	0.1094	0.4060	0.3668	0.3647	0.3772	0.0906	0.1085	0.0835	0.1091	0.1090	0.1139	0.1098	0.1104	0.1127	0.1097	0.1099	0.1097	0.0910	0.1094
23:39:16	35.0	0.0850	0.3614	0.3653	0.3603	0.3632	0.1088	0.3747	0.2936	0.2719	0.2716	0.0910	0.0833	0.0869	0.1126	0.1133	0.1104	0.1097	0.1081	0.1095	0.1150	0.1107	0.1104	0.0916	0.0834	0.0849	0.3491	0.3583	0.3659	0.3520	0.1093	0.4078	0.3677	0.3653	0.3777	0.0906	0.1086	0.0833	0.1090	0.1090	0.1139	0.1098	0.1103	0.1127	0.1096	0.1100	0.1095	0.0910	0.1094
23:59:16	35.0	0.0852	0.3623	0.3671	0.3620	0.3642	0.1091	0.3761	0.2958	0.2734	0.2723	0.0911	0.0835	0.0870	0.1129	0.1134	0.1106	0.1099	0.1082	0.1097	0.1152	0.1107	0.1106	0.0917	0.0836	0.0850	0.3462	0.3589	0.3655	0.3542	0.1094	0.4085	0.3690	0.3651	0.3776	0.0907	0.1088	0.0835	0.1092	0.1091	0.1141	0.1099	0.1107	0.1128	0.1097	0.1101	0.1098	0.0911	0.1096
1 day, 0:19:16	35.0	0.0851	0.3627	0.3678	0.3627	0.3651	0.1089	0.3791	0.3002	0.2755	0.2719	0.0909	0.0835	0.0868	0.1128	0.1134	0.1104	0.1097	0.1082	0.1097	0.1151	0.1107	0.1105	0.0916	0.0834	0.0849	0.3456	0.3553	0.3655	0.3561	0.1094	0.4086	0.3700	0.3649	0.3786	0.0906	0.1086	0.0834	0.1090	0.1092	0.1138	0.1098	0.1105	0.1128	0.1097	0.1100	0.1096	0.0910	0.1095
1 day, 0:39:16	35.0	0.0850	0.3639	0.3685	0.3638	0.3658	0.1089	0.3809	0.3001	0.2761	0.2742	0.0908	0.0832	0.0868	0.1127	0.1132	0.1103	0.1097	0.1081	0.1096	0.1150	0.1106	0.1104	0.0916	0.0834	0.0848	0.3448	0.3552	0.3656	0.3573	0.1093	0.4088	0.3691	0.3654	0.3788	0.0905	0.1085	0.0834	0.1089	0.1090	0.1139	0.1098	0.1105	0.1127	0.1096	0.1099	0.1096	0.0909	0.1096
1 day, 0:59:16	35.0	0.0852	0.3647	0.3694	0.3646	0.3670	0.1090	0.3818	0.3013	0.2776	0.2722	0.0909	0.0834	0.0869	0.1128	0.1133	0.1105	0.1098	0.1082	0.1097	0.1151	0.1107	0.1106	0.0916	0.0834	0.0848	0.3440	0.3527	0.3642	0.3572	0.1095	0.4097	0.3708	0.3665	0.3791	0.0907	0.1086	0.0835	0.1092	0.1092	0.1140	0.1099	0.1106	0.1129	0.1097	0.1101	0.1096	0.0910	0.1095
1 day, 1:19:16	35.0	0.0851	0.3652	0.3699	0.3657	0.3678	0.1091	0.3840	0.3040	0.2799	0.2758	0.0908	0.0834	0.0869	0.1127	0.1135	0.1105	0.1099	0.1082	0.1097	0.1152	0.1106	0.1106	0.0916	0.0834	0.0849	0.3438	0.3548	0.3643	0.3594	0.1097	0.4096	0.3726	0.3660	0.3808	0.0906	0.1087	0.0834	0.1092	0.1092	0.1140	0.1118	0.1107	0.1128	0.1097	0.1100	0.1098	0.0909	0.1095
1 day, 1:39:16	35.0	0.0851	0.3663	0.3707	0.3661	0.3687	0.1089	0.3884	0.3049	0.2811	0.2779	0.0907	0.0833	0.0868	0.1127	0.1134	0.1104	0.1098	0.1081	0.1096	0.1151	0.1107	0.1106	0.0915	0.0834	0.0849	0.3446	0.3574	0.3655	0.3598	0.1094	0.4111	0.3748	0.3675	0.3820	0.0906	0.1086	0.0834	0.1091	0.1091	0.1140	0.1113	0.1106	0.1127	0.1098	0.1100	0.1097	0.0910	0.1094
1 day, 1:59:16	35.0	0.0851	0.3669	0.3710	0.3670	0.3698	0.1090	0.3888	0.3057	0.2819	0.2752	0.0907	0.0835	0.0869	0.1128	0.1135	0.1105	0.1098	0.1082	0.1096	0.1151	0.1107	0.1106	0.0916	0.0835	0.0848	0.3449	0.3583	0.3660	0.3586	0.1096	0.4120	0.3752	0.3687	0.3838	0.0906	0.1087	0.0834	0.1093	0.1091	0.1140	0.1117	0.1106	0.1128	0.1097	0.1101	0.1099	0.0910	0.1095
1 day, 2:19:16	35.0	0.0850	0.3667	0.3719	0.3680	0.3706	0.1090	0.3924	0.3085	0.2844	0.2786	0.0907	0.0834	0.0869	0.1128	0.1135	0.1105	0.1099	0.1081	0.1097	0.1152	0.1107	0.1107	0.0915	0.0834	0.0849	0.3448	0.3600	0.3666	0.3588	0.1099	0.4130	0.3764	0.3710	0.3846	0.0906	0.1088	0.0835	0.1092	0.1091	0.1141	0.1100	0.1108	0.1128	0.1098	0.1100	0.1098	0.0911	0.1096
1 day, 2:39:16	35.0	0.0849	0.3679	0.3727	0.3685	0.3709	0.1089	0.3917	0.3098	0.2853	0.2779	0.0904	0.0832	0.0868	0.1127	0.1134	0.1105	0.1097	0.1081	0.1095	0.1150	0.1107	0.1105	0.0916	0.0833	0.0847	0.3447	0.3612	0.3642	0.3594	0.1096	0.4125	0.3780	0.3740	0.3853	0.0905	0.1085	0.0833	0.1091	0.1091	0.1138	0.1099	0.1105	0.1128	0.1096	0.1099	0.1097	0.0910	0.1094
1 day, 2:59:16	35.0	0.0850	0.3678	0.3733	0.3693	0.3716	0.1089	0.3923	0.3099	0.2862	0.2776	0.0905	0.0834	0.0870	0.1128	0.1135	0.1104	0.1098	0.1082	0.1096	0.1151	0.1106	0.1106	0.0914	0.0835	0.0848	0.3453	0.3648	0.3644	0.3595	0.1098	0.4125	0.3782	0.3724	0.3872	0.0906	0.1087	0.0834	0.1092	0.1091	0.1141	0.1099	0.1105	0.1128	0.1098	0.1100	0.1099	0.0909	0.1096
1 day, 3:19:16	35.0	0.0850	0.3680	0.3738	0.3698	0.3723	0.1090	0.3911	0.3118	0.2875	0.2790	0.0904	0.0835	0.0870	0.1129	0.1134	0.1105	0.1099	0.1084	0.1097	0.1151	0.1107	0.1107	0.0914	0.0834	0.0848	0.3468	0.3653	0.3692	0.3629	0.1099	0.4131	0.3794	0.3723	0.3879	0.0905	0.1086	0.0834	0.1092	0.1092	0.1140	0.1099	0.1106	0.1129	0.1097	0.1101	0.1098	0.0909	0.1095
1 day, 3:39:16	35.0	0.0851	0.3685	0.3738	0.3702	0.3727	0.1089	0.3957	0.3130	0.2884	0.2812	0.0904	0.0834	0.0870	0.1127	0.1134	0.1105	0.1098	0.1081	0.1097	0.1151	0.1106	0.1107	0.0919	0.0834	0.0848	0.3483	0.3688	0.3736	0.3692	0.1099	0.4126	0.3796	0.3735	0.3873	0.0905	0.1087	0.0834	0.1093	0.1093	0.1141	0.1100	0.1107	0.1129	0.1097	0.1101	0.1098	0.0909	0.1096
1 day, 3:59:16	35.0	0.0850	0.3687	0.3745	0.3703	0.3732	0.1089	0.3976	0.3213	0.2890	0.2812	0.0903	0.0834	0.0868	0.1128	0.1134	0.1104	0.1098	0.1082	0.1096	0.1150	0.1107	0.1106	0.0914	0.0834	0.0848	0.3503	0.3721	0.3771	0.3747	0.1100	0.4133	0.3793	0.3740	0.3878	0.0905	0.1087	0.0834	0.1092	0.1091	0.1140	0.1099	0.1106	0.1128	0.1098	0.1101	0.1098	0.0908	0.1095
1 day, 4:19:16	35.0	0.0851	0.3702	0.3756	0.3715	0.3738	0.1091	0.3956	0.3187	0.2901	0.2814	0.0903	0.0833	0.0868	0.1129	0.1136	0.1106	0.1099	0.1083	0.1097	0.1152	0.1108	0.1108	0.0918	0.0834	0.0849	0.3534	0.3771	0.3816	0.3824	0.1102	0.4143	0.3810	0.3737	0.3888	0.0906	0.1088	0.0835	0.1094	0.1093	0.1141	0.1114	0.1108	0.1129	0.1099	0.1103	0.1099	0.0910	0.1098
1 day, 4:39:16	35.0	0.0849	0.3699	0.3755	0.3722	0.3742	0.1089	0.3993	0.3239	0.2912	0.2784	0.0902	0.0834	0.0870	0.1127	0.1134	0.1105	0.1097	0.1081	0.1097	0.1151	0.1106	0.1108	0.0914	0.0833	0.0847	0.3577	0.3819	0.3857	0.3841	0.1101	0.4137	0.3820	0.3749	0.3882	0.0906	0.1086	0.0834	0.1094	0.1092	0.1140	0.1098	0.1107	0.1129	0.1098	0.1102	0.1098	0.0909	0.1098
1 day, 4:59:16	35.0	0.0850	0.3703	0.3757	0.3726	0.3741	0.1090	0.3985	0.3200	0.2909	0.2793	0.0902	0.0834	0.0868	0.1128	0.1134	0.1105	0.1099	0.1082	0.1097	0.1152	0.1107	0.1107	0.0916	0.0834	0.0847	0.3600	0.3841	0.3887	0.3865	0.1102	0.4142	0.3822	0.3753	0.3898	0.0906	0.1087	0.0834	0.1093	0.1092	0.1140	0.1100	0.1108	0.1129	0.1098	0.1102	0.1099	0.0908	0.1096
1 day, 5:19:16	35.0	0.0849	0.3701	0.3767	0.3728	0.3744	0.1090	0.3985	0.3216	0.2908	0.2794	0.0902	0.0833	0.0869	0.1128	0.1134	0.1106	0.1099	0.1083	0.1097	0.1152	0.1108	0.1107	0.0913	0.0833	0.0848	0.3616	0.3845	0.3873	0.3880	0.1104	0.4158	0.3831	0.3758	0.3886	0.0906	0.1087	0.0833	0.1094	0.1093	0.1140	0.1099	0.1107	0.1129	0.1098	0.1103	0.1099	0.0909	0.1096
1 day, 5:39:16	35.0	0.0850	0.3707	0.3765	0.3735	0.3751	0.1090	0.4040	0.3227	0.2913	0.2792	0.0902	0.0833	0.0869	0.1129	0.1137	0.1105	0.1100	0.1083	0.1097	0.1152	0.1108	0.1108	0.0913	0.0835	0.0849	0.3624	0.3837	0.3865	0.3896	0.1105	0.4155	0.3835	0.3767	0.3896	0.0906	0.1087	0.0834	0.1095	0.1092	0.1140	0.1100	0.1108	0.1130	0.1098	0.1103	0.1098	0.0909	0.1097
1 day, 5:59:16	35.0	0.0851	0.3706	0.3770	0.3740	0.3755	0.1091	0.4016	0.3233	0.2921	0.2807	0.0901	0.0834	0.0869	0.1128	0.1136	0.1106	0.1099	0.1084	0.1098	0.1152	0.1108	0.1108	0.0914	0.0834	0.0849	0.3629	0.3835	0.3855	0.3899	0.1106	0.4151	0.3843	0.3775	0.3892	0.0906	0.1088	0.0834	0.1095	0.1093	0.1141	0.1101	0.1108	0.1130	0.1099	0.1103	0.1100	0.0909	0.1095
1 day, 6:19:16	35.0	0.0850	0.3710	0.3777	0.3743	0.3762	0.1090	0.3997	0.3235	0.2921	0.2824	0.0900	0.0834	0.0871	0.1128	0.1135	0.1107	0.1100	0.1084	0.1097	0.1153	0.1108	0.1111	0.0914	0.0834	0.0849	0.3634	0.3837	0.3841	0.3937	0.1110	0.4152	0.3840	0.3785	0.3908	0.0907	0.1087	0.0834	0.1096	0.1093	0.1141	0.1101	0.1109	0.1130	0.1100	0.1104	0.1099	0.0910	0.1098
1 day, 6:39:16	35.0	0.0850	0.3706	0.3774	0.3746	0.3758	0.1090	0.4003	0.3230	0.2936	0.2825	0.0899	0.0834	0.0869	0.1128	0.1135	0.1106	0.1100	0.1084	0.1097	0.1152	0.1108	0.1110	0.0913	0.0835	0.0850	0.3655	0.3833	0.3837	0.3926	0.1112	0.4152	0.3840	0.3778	0.3916	0.0909	0.1087	0.0834	0.1097	0.1092	0.1142	0.1101	0.1109	0.1130	0.1100	0.1105	0.1099	0.0909	0.1098
1 day, 6:59:16	35.0	0.0850	0.3714	0.3777	0.3750	0.3761	0.1090	0.3991	0.3227	0.2940	0.2830	0.0898	0.0833	0.0869	0.1128	0.1134	0.1106	0.1100	0.1085	0.1097	0.1151	0.1108	0.1109	0.0913	0.0834	0.0848	0.3647	0.3828	0.3820	0.3942	0.1114	0.4153	0.3850	0.3785	0.3910	0.0907	0.1088	0.0834	0.1097	0.1094	0.1141	0.1101	0.1109	0.1130	0.1099	0.1104	0.1100	0.0910	0.1096
1 day, 7:19:16	35.0	0.0852	0.3708	0.3781	0.3751	0.3768	0.1090	0.3994	0.3196	0.2936	0.2839	0.0899	0.0834	0.0869	0.1128	0.1135	0.1107	0.1101	0.1084	0.1098	0.1153	0.1108	0.1112	0.0913	0.0834	0.0849	0.3656	0.3836	0.3814	0.3951	0.1116	0.4158	0.3855	0.3787	0.3919	0.0908	0.1088	0.0834	0.1097	0.1094	0.1142	0.1140	0.1110	0.1129	0.1100	0.1104	0.1101	0.0911	0.1097
1 day, 7:39:16	35.0	0.0849	0.3712	0.3777	0.3752	0.3770	0.1090	0.3989	0.3195	0.2946	0.2845	0.0897	0.0834	0.0869	0.1129	0.1136	0.1106	0.1102	0.1083	0.1097	0.1153	0.1109	0.1111	0.0912	0.0834	0.0848	0.3663	0.3841	0.3803	0.3962	0.1119	0.4152	0.3849	0.3794	0.3915	0.0908	0.1088	0.0834	0.1097	0.1093	0.1141	0.1101	0.1110	0.1130	0.1099	0.1104	0.1099	0.0909	0.1100
1 day, 7:59:16	35.0	0.0850	0.3710	0.3782	0.3754	0.3770	0.1092	0.3969	0.3221	0.2942	0.2842	0.0895	0.0832	0.0867	0.1128	0.1135	0.1105	0.1102	0.1083	0.1098	0.1152	0.1107	0.1112	0.0912	0.0833	0.0848	0.3671	0.3831	0.3805	0.3965	0.1123	0.4148	0.3858	0.3792	0.3918	0.0907	0.1087	0.0833	0.1098	0.1093	0.1141	0.1135	0.1110	0.1131	0.1100	0.1106	0.1100	0.0909	0.1096
1 day, 8:19:16	35.0	0.0850	0.3718	0.3785	0.3759	0.3768	0.1092	0.3971	0.3208	0.2946	0.2841	0.0896	0.0832	0.0867	0.1128	0.1136	0.1106	0.1101	0.1083	0.1097	0.1152	0.1108	0.1112	0.0911	0.0834	0.0848	0.3690	0.3830	0.3809	0.3983	0.1126	0.4154	0.3864	0.3802	0.3914	0.0908	0.1086	0.0833	0.1099	0.1092	0.1142	0.1101	0.1111	0.1130	0.1100	0.1105	0.1100	0.0908	0.1096
1 day, 8:39:16	35.0	0.0850	0.3719	0.3790	0.3758	0.3778	0.1090	0.3989	0.3209	0.2958	0.2855	0.0895	0.0834	0.0870	0.1128	0.1136	0.1107	0.1102	0.1085	0.1098	0.1152	0.1109	0.1114	0.0913	0.0834	0.0849	0.3707	0.3835	0.3814	0.4007	0.1131	0.4145	0.3864	0.3797	0.3920	0.0911	0.1088	0.0834	0.1099	0.1094	0.1144	0.1129	0.1111	0.1131	0.1101	0.1107	0.1102	0.0910	0.1098
1 day, 8:59:16	35.0	0.0850	0.3716	0.3788	0.3763	0.3776	0.1090	0.3979	0.3220	0.2945	0.2843	0.0895	0.0834	0.0870	0.1128	0.1137	0.1107	0.1103	0.1083	0.1098	0.1154	0.1108	0.1115	0.0912	0.0835	0.0848	0.3707	0.3849	0.3833	0.4002	0.1136	0.4151	0.3863	0.3808	0.3923	0.0911	0.1088	0.0835	0.1101	0.1094	0.1142	0.1126	0.1112	0.1131	0.1101	0.1107	0.1106	0.0910	0.1097
1 day, 9:19:16	35.0	0.0850	0.3719	0.3787	0.3759	0.3778	0.1091	0.3952	0.3295	0.2961	0.2853	0.0893	0.0834	0.0869	0.1128	0.1135	0.1106	0.1103	0.1083	0.1098	0.1152	0.1110	0.1116	0.0911	0.0834	0.0848	0.3712	0.3848	0.3845	0.4012	0.1142	0.4153	0.3884	0.3810	0.3913	0.0911	0.1087	0.0834	0.1102	0.1092	0.1142	0.1110	0.1112	0.1130	0.1100	0.1108	0.1100	0.0909	0.1096
1 day, 9:39:16	35.0	0.0850	0.3719	0.3788	0.3766	0.3779	0.1093	0.3979	0.3235	0.2959	0.2860	0.0893	0.0835	0.0869	0.1128	0.1137	0.1107	0.1102	0.1085	0.1099	0.1154	0.1110	0.1118	0.0911	0.0834	0.0849	0.3788	0.3857	0.3844	0.4012	0.1148	0.4153	0.3876	0.3805	0.3921	0.0913	0.1088	0.0835	0.1103	0.1094	0.1143	0.1104	0.1113	0.1131	0.1101	0.1108	0.1102	0.0910	0.1096
1 day, 9:59:16	35.0	0.0850	0.3714	0.3794	0.3766	0.3781	0.1101	0.3918	0.3254	0.2960	0.2855	0.0892	0.0834	0.0870	0.1128	0.1136	0.1106	0.1103	0.1085	0.1098	0.1152	0.1110	0.1117	0.0912	0.0834	0.0848	0.3733	0.3843	0.3843	0.4007	0.1155	0.4147	0.3881	0.3803	0.3906	0.0915	0.1087	0.0834	0.1103	0.1095	0.1143	0.1113	0.1115	0.1131	0.1101	0.1112	0.1102	0.0909	0.1096
1 day, 10:19:16	34.9	0.0850	0.3718	0.3793	0.3767	0.3786	0.1094	0.3911	0.3255	0.2948	0.2862	0.0891	0.0832	0.0869	0.1128	0.1136	0.1107	0.1103	0.1084	0.1098	0.1152	0.1110	0.1119	0.0911	0.0834	0.0848	0.3744	0.3849	0.3849	0.4010	0.1162	0.4156	0.3884	0.3805	0.3923	0.0916	0.1088	0.0834	0.1104	0.1094	0.1142	0.1104	0.1115	0.1130	0.1102	0.1111	0.1102	0.0908	0.1096
1 day, 10:39:16	35.0	0.0849	0.3718	0.3791	0.3770	0.3788	0.1098	0.3913	0.3284	0.2924	0.2854	0.0890	0.0832	0.0868	0.1126	0.1135	0.1106	0.1102	0.1084	0.1098	0.1152	0.1110	0.1120	0.0909	0.0834	0.0847	0.3758	0.3844	0.3853	0.4033	0.1171	0.4149	0.3885	0.3812	0.3913	0.0917	0.1087	0.0833	0.1104	0.1093	0.1142	0.1103	0.1116	0.1130	0.1100	0.1111	0.1101	0.0908	0.1095
1 day, 10:59:16	35.0	0.0850	0.3726	0.3793	0.3773	0.3786	0.1098	0.3861	0.3181	0.2939	0.2857	0.0890	0.0834	0.0869	0.1129	0.1137	0.1106	0.1103	0.1084	0.1098	0.1152	0.1111	0.1124	0.0911	0.0833	0.0848	0.3765	0.3836	0.3867	0.4013	0.1183	0.4151	0.3891	0.3813	0.3915	0.0920	0.1089	0.0834	0.1106	0.1094	0.1144	0.1104	0.1118	0.1131	0.1102	0.1114	0.1102	0.0909	0.1097
1 day, 11:19:16	35.0	0.0849	0.3722	0.3798	0.3776	0.3787	0.1099	0.3891	0.3503	0.2933	0.2854	0.0889	0.0834	0.0867	0.1127	0.1137	0.1107	0.1102	0.1085	0.1099	0.1153	0.1112	0.1127	0.0911	0.0833	0.0847	0.3776	0.3850	0.3871	0.4026	0.1194	0.4158	0.3885	0.3809	0.3924	0.0921	0.1088	0.0833	0.1107	0.1094	0.1143	0.1105	0.1120	0.1131	0.1102	0.1116	0.1108	0.0908	0.1096
1 day, 11:39:16	35.0	0.0849	0.3722	0.3797	0.3775	0.3792	0.1096	0.3882	0.3495	0.2919	0.2841	0.0887	0.0833	0.0869	0.1128	0.1137	0.1108	0.1102	0.1085	0.1099	0.1154	0.1113	0.1129	0.0910	0.0834	0.0848	0.3784	0.3847	0.3884	0.4039	0.1208	0.4153	0.3892	0.3820	0.3918	0.0925	0.1088	0.0834	0.1108	0.1095	0.1144	0.1106	0.1121	0.1131	0.1102	0.1117	0.1102	0.0908	0.1096
1 day, 11:59:16	35.0	0.0850	0.3726	0.3798	0.3774	0.3791	0.1094	0.3880	0.3206	0.2925	0.2837	0.0887	0.0833	0.0868	0.1127	0.1137	0.1107	0.1103	0.1085	0.1098	0.1154	0.1112	0.1132	0.0909	0.0833	0.0848	0.3788	0.3857	0.3880	0.4037	0.1224	0.4160	0.3891	0.3812	0.3915	0.0928	0.1087	0.0834	0.1111	0.1095	0.1144	0.1114	0.1123	0.1132	0.1103	0.1119	0.1104	0.0908	0.1097
1 day, 12:19:16	35.0	0.0850	0.3728	0.3803	0.3774	0.3791	0.1096	0.3851	0.2915	0.2926	0.2837	0.0887	0.0834	0.0870	0.1127	0.1136	0.1107	0.1103	0.1085	0.1098	0.1154	0.1114	0.1136	0.0909	0.0834	0.0849	0.3791	0.3854	0.3885	0.4029	0.1242	0.4162	0.3896	0.3819	0.3930	0.0932	0.1089	0.0834	0.1112	0.1094	0.1145	0.1107	0.1125	0.1131	0.1105	0.1122	0.1106	0.0910	0.1097
1 day, 12:39:16	35.0	0.0851	0.3733	0.3799	0.3777	0.3790	0.1094	0.3841	0.2824	0.2889	0.2834	0.0886	0.0833	0.0869	0.1128	0.1138	0.1107	0.1102	0.1086	0.1099	0.1155	0.1113	0.1140	0.0909	0.0834	0.0849	0.3803	0.3861	0.3886	0.4029	0.1262	0.4157	0.3904	0.3821	0.3923	0.0937	0.1088	0.0834	0.1113	0.1094	0.1145	0.1109	0.1128	0.1131	0.1105	0.1126	0.1108	0.0909	0.1098
1 day, 12:59:16	35.0	0.0849	0.3733	0.3804	0.3780	0.3795	0.1095	0.3823	0.2815	0.2925	0.2836	0.0885	0.0834	0.0869	0.1127	0.1136	0.1107	0.1102	0.1084	0.1098	0.1155	0.1116	0.1146	0.0909	0.0833	0.0847	0.3803	0.3856	0.3891	0.4022	0.1284	0.4159	0.3889	0.3823	0.3918	0.0941	0.1087	0.0833	0.1114	0.1094	0.1145	0.1108	0.1130	0.1131	0.1106	0.1127	0.1104	0.0908	0.1096
1 day, 13:19:16	35.0	0.0851	0.3739	0.3800	0.3785	0.3796	0.1097	0.3454	0.2815	0.2884	0.2833	0.0885	0.0834	0.0869	0.1129	0.1138	0.1107	0.1102	0.1087	0.1099	0.1157	0.1117	0.1152	0.0910	0.0835	0.0850	0.3811	0.3859	0.3899	0.4025	0.1313	0.4153	0.3900	0.3828	0.3931	0.0949	0.1089	0.0834	0.1119	0.1096	0.1146	0.1134	0.1134	0.1132	0.1107	0.1132	0.1106	0.0909	0.1099
1 day, 13:39:16	35.0	0.0851	0.3738	0.3801	0.3785	0.3800	0.1098	0.3443	0.2848	0.2931	0.2822	0.0884	0.0835	0.0870	0.1129	0.1138	0.1108	0.1104	0.1087	0.1100	0.1158	0.1120	0.1159	0.0911	0.0835	0.0849	0.3815	0.3851	0.3891	0.4025	0.1342	0.4149	0.3894	0.3821	0.3924	0.0955	0.1089	0.0834	0.1121	0.1096	0.1148	0.1113	0.1139	0.1132	0.1108	0.1136	0.1107	0.0909	0.1098
1 day, 13:59:16	35.0	0.0850	0.3745	0.3806	0.3786	0.3796	0.1100	0.3513	0.2833	0.3022	0.2818	0.0883	0.0834	0.0870	0.1130	0.1138	0.1108	0.1104	0.1088	0.1100	0.1158	0.1120	0.1166	0.0910	0.0834	0.0849	0.3818	0.3862	0.3893	0.4026	0.1375	0.4176	0.3897	0.3830	0.3920	0.0964	0.1089	0.0835	0.1122	0.1096	0.1148	0.1114	0.1143	0.1132	0.1108	0.1142	0.1110	0.0910	0.1098
1 day, 14:19:16	35.0	0.0850	0.3747	0.3809	0.3784	0.3801	0.1101	0.3181	0.2895	0.3077	0.2801	0.0881	0.0834	0.0868	0.1128	0.1138	0.1108	0.1103	0.1087	0.1098	0.1158	0.1121	0.1173	0.0909	0.0834	0.0849	0.3825	0.3861	0.3903	0.4021	0.1415	0.4154	0.3895	0.3828	0.3927	0.0971	0.1088	0.0834	0.1126	0.1096	0.1149	0.1117	0.1146	0.1132	0.1109	0.1146	0.1110	0.0909	0.1097
1 day, 14:39:16	35.0	0.0851	0.3745	0.3805	0.3789	0.3802	0.1100	0.3207	0.2983	0.3095	0.2741	0.0882	0.0834	0.0868	0.1129	0.1138	0.1108	0.1104	0.1087	0.1099	0.1160	0.1122	0.1183	0.0909	0.0833	0.0848	0.3823	0.3868	0.3900	0.4016	0.1461	0.4164	0.3906	0.3830	0.3923	0.0984	0.1089	0.0834	0.1127	0.1095	0.1150	0.1118	0.1152	0.1133	0.1110	0.1152	0.1109	0.0909	0.1097
1 day, 14:59:16	35.0	0.0851	0.3753	0.3806	0.3789	0.3804	0.1103	0.3248	0.2970	0.3127	0.2806	0.0881	0.0834	0.0868	0.1129	0.1138	0.1108	0.1104	0.1087	0.1100	0.1161	0.1125	0.1194	0.0910	0.0834	0.0848	0.3842	0.3867	0.3910	0.4032	0.1507	0.4170	0.3902	0.3834	0.3930	0.0997	0.1089	0.0834	0.1131	0.1096	0.1151	0.1132	0.1158	0.1132	0.1112	0.1159	0.1111	0.0908	0.1098
1 day, 15:19:16	35.0	0.0850	0.3750	0.3809	0.3790	0.3797	0.1105	0.3307	0.3030	0.3140	0.2834	0.0880	0.0833	0.0869	0.1130	0.1139	0.1108	0.1105	0.1087	0.1100	0.1162	0.1128	0.1207	0.0909	0.0834	0.0848	0.3840	0.3862	0.3907	0.4024	0.1566	0.4160	0.3907	0.3827	0.3925	0.1011	0.1088	0.0834	0.1133	0.1097	0.1151	0.1160	0.1164	0.1133	0.1113	0.1167	0.1110	0.0910	0.1097
1 day, 15:39:16	35.0	0.0849	0.3753	0.3810	0.3784	0.3777	0.1104	0.3369	0.3311	0.3140	0.2849	0.0878	0.0832	0.0869	0.1129	0.1138	0.1108	0.1102	0.1088	0.1099	0.1164	0.1132	0.1220	0.0909	0.0833	0.0848	0.3844	0.3861	0.3921	0.4019	0.1632	0.4171	0.3911	0.3837	0.3920	0.1027	0.1088	0.0834	0.1138	0.1095	0.1152	0.1125	0.1171	0.1133	0.1114	0.1175	0.1113	0.0907	0.1098
1 day, 15:59:16	35.0	0.0851	0.3736	0.3810	0.3766	0.3771	0.1108	0.3398	0.3184	0.3146	0.2900	0.0879	0.0834	0.0869	0.1129	0.1138	0.1108	0.1104	0.1089	0.1100	0.1165	0.1134	0.1236	0.0909	0.0835	0.0849	0.3927	0.3862	0.3917	0.4017	0.1711	0.4168	0.3907	0.3834	0.3920	0.1049	0.1089	0.0833	0.1141	0.1096	0.1153	0.1145	0.1181	0.1132	0.1117	0.1186	0.1112	0.0909	0.1098
1 day, 16:19:16	35.0	0.0851	0.3730	0.3811	0.3758	0.3769	0.1110	0.3415	0.3194	0.3149	0.2965	0.0876	0.0832	0.0867	0.1130	0.1137	0.1108	0.1104	0.1089	0.1099	0.1166	0.1138	0.1256	0.0909	0.0834	0.0849	0.3854	0.3868	0.3922	0.4026	0.1802	0.4156	0.3909	0.3832	0.3918	0.1072	0.1089	0.0834	0.1147	0.1096	0.1155	0.1130	0.1191	0.1133	0.1118	0.1196	0.1114	0.0908	0.1118
1 day, 16:39:16	35.0	0.0851	0.3731	0.3816	0.3756	0.3766	0.1112	0.3434	0.3204	0.3154	0.3021	0.0875	0.0835	0.0871	0.1130	0.1139	0.1109	0.1106	0.1091	0.1099	0.1168	0.1143	0.1280	0.0909	0.0834	0.0848	0.3856	0.3852	0.3923	0.4015	0.1914	0.4167	0.3912	0.3834	0.3919	0.1097	0.1089	0.0834	0.1153	0.1097	0.1157	0.1135	0.1202	0.1133	0.1122	0.1211	0.1116	0.0908	0.1098
1 day, 16:59:16	35.0	0.0852	0.3742	0.3802	0.3760	0.3766	0.1116	0.3427	0.3219	0.3153	0.3047	0.0876	0.0835	0.0869	0.1130	0.1139	0.1109	0.1106	0.1092	0.1101	0.1172	0.1148	0.1307	0.0909	0.0834	0.0849	0.3863	0.3869	0.3942	0.4027	0.2045	0.4172	0.3911	0.3840	0.3921	0.1127	0.1089	0.0835	0.1159	0.1097	0.1160	0.1145	0.1215	0.1133	0.1126	0.1227	0.1119	0.0910	0.1099
1 day, 17:19:16	35.0	0.0849	0.3747	0.3783	0.3762	0.3773	0.1118	0.3430	0.3225	0.3170	0.3063	0.0874	0.0833	0.0869	0.1130	0.1138	0.1108	0.1105	0.1091	0.1100	0.1172	0.1153	0.1337	0.0908	0.0834	0.0848	0.3867	0.3869	0.3942	0.4014	0.2205	0.4172	0.3899	0.3837	0.3921	0.1159	0.1089	0.0833	0.1164	0.1095	0.1160	0.1143	0.1229	0.1133	0.1128	0.1243	0.1119	0.0909	0.1098
1 day, 17:39:16	35.0	0.0849	0.3748	0.3780	0.3760	0.3776	0.1123	0.3426	0.3226	0.3167	0.3071	0.0872	0.0833	0.0868	0.1130	0.1137	0.1108	0.1103	0.1092	0.1098	0.1174	0.1160	0.1376	0.0908	0.0833	0.0847	0.3873	0.3872	0.3940	0.4009	0.2330	0.4169	0.3912	0.3859	0.3917	0.1195	0.1089	0.0834	0.1171	0.1096	0.1164	0.1148	0.1246	0.1132	0.1132	0.1260	0.1125	0.0908	0.1099
1 day, 17:59:16	35.0	0.0850	0.3757	0.3778	0.3771	0.3778	0.1126	0.3462	0.3227	0.3168	0.3083	0.0872	0.0833	0.0870	0.1131	0.1139	0.1108	0.1105	0.1093	0.1101	0.1178	0.1167	0.1421	0.0907	0.0834	0.0848	0.3917	0.3864	0.3941	0.4026	0.2453	0.4154	0.3907	0.3843	0.3921	0.1236	0.1090	0.0834	0.1180	0.1097	0.1167	0.1184	0.1265	0.1134	0.1138	0.1287	0.1124	0.0908	0.1101
1 day, 18:19:16	35.0	0.0851	0.3758	0.3787	0.3775	0.3788	0.1131	0.3445	0.3236	0.3169	0.3088	0.0871	0.0833	0.0869	0.1130	0.1139	0.1108	0.1106	0.1094	0.1101	0.1181	0.1176	0.1471	0.0906	0.0834	0.0848	0.3888	0.3869	0.3951	0.4013	0.2585	0.4157	0.3904	0.3847	0.3914	0.1287	0.1089	0.0833	0.1187	0.1096	0.1170	0.1161	0.1287	0.1133	0.1141	0.1312	0.1126	0.0907	0.1099
1 day, 18:39:16	35.0	0.0850	0.3767	0.3790	0.3778	0.3788	0.1136	0.3408	0.3244	0.3171	0.3093	0.0868	0.0833	0.0870	0.1131	0.1139	0.1109	0.1104	0.1095	0.1100	0.1186	0.1184	0.1532	0.0908	0.0834	0.0848	0.3901	0.3868	0.3943	0.4014	0.2697	0.4165	0.3888	0.3855	0.3920	0.1326	0.1090	0.0834	0.1198	0.1097	0.1173	0.1198	0.1313	0.1133	0.1148	0.1342	0.1130	0.0909	0.1098
1 day, 18:59:16	35.0	0.0849	0.3776	0.3801	0.3781	0.3794	0.1142	0.3405	0.3242	0.3167	0.3098	0.0868	0.0833	0.0867	0.1130	0.1138	0.1108	0.1105	0.1096	0.1098	0.1190	0.1195	0.1600	0.0906	0.0833	0.0847	0.3899	0.3868	0.3960	0.4019	0.2789	0.4159	0.3873	0.3848	0.3926	0.1358	0.1088	0.0833	0.1208	0.1096	0.1176	0.1194	0.1345	0.1132	0.1153	0.1381	0.1133	0.0907	0.1098
1 day, 19:19:16	35.0	0.0849	0.3778	0.3804	0.3785	0.3797	0.1150	0.3412	0.3245	0.3175	0.3099	0.0866	0.0832	0.0869	0.1130	0.1139	0.1109	0.1104	0.1097	0.1098	0.1195	0.1206	0.1674	0.0907	0.0833	0.0848	0.3903	0.3866	0.3960	0.4011	0.2859	0.4164	0.3872	0.3846	0.3926	0.1389	0.1088	0.0834	0.1219	0.1097	0.1181	0.1185	0.1381	0.1134	0.1162	0.1423	0.1139	0.0908	0.1098
1 day, 19:39:16	35.0	0.0850	0.3783	0.3808	0.3792	0.3804	0.1156	0.3420	0.3241	0.3173	0.3102	0.0865	0.0833	0.0869	0.1131	0.1138	0.1108	0.1104	0.1099	0.1100	0.1202	0.1221	0.1757	0.0906	0.0833	0.0847	0.3916	0.3870	0.3965	0.4011	0.2849	0.4154	0.3872	0.3832	0.3906	0.1413	0.1089	0.0833	0.1232	0.1096	0.1186	0.1193	0.1421	0.1132	0.1171	0.1475	0.1142	0.0908	0.1098
1 day, 19:59:16	34.9	0.0850	0.3793	0.3815	0.3799	0.3808	0.1166	0.3400	0.3238	0.3178	0.3104	0.0865	0.0834	0.0869	0.1132	0.1139	0.1110	0.1105	0.1103	0.1100	0.1210	0.1237	0.1850	0.0906	0.0834	0.0849	0.3923	0.3874	0.3973	0.4013	0.2903	0.4155	0.3877	0.3810	0.3890	0.1440	0.1090	0.0835	0.1250	0.1098	0.1192	0.1205	0.1472	0.1134	0.1183	0.1529	0.1148	0.0909	0.1099
1 day, 20:19:16	35.0	0.0849	0.3795	0.3812	0.3801	0.3817	0.1176	0.3408	0.3259	0.3181	0.3107	0.0862	0.0832	0.0867	0.1131	0.1138	0.1109	0.1105	0.1102	0.1099	0.1218	0.1253	0.1952	0.0905	0.0834	0.0848	0.3930	0.3877	0.3975	0.4017	0.2959	0.4151	0.3875	0.3813	0.3882	0.1459	0.1088	0.0833	0.1267	0.1097	0.1198	0.1222	0.1524	0.1134	0.1195	0.1589	0.1155	0.0908	0.1116
1 day, 20:39:16	35.0	0.0849	0.3798	0.3826	0.3808	0.3820	0.1188	0.3373	0.3252	0.3185	0.3112	0.0862	0.0834	0.0869	0.1132	0.1139	0.1110	0.1105	0.1106	0.1101	0.1228	0.1275	0.2092	0.0907	0.0835	0.0849	0.3943	0.3873	0.3981	0.4006	0.2988	0.4151	0.3877	0.3806	0.3880	0.1476	0.1090	0.0834	0.1286	0.1098	0.1204	0.1230	0.1584	0.1134	0.1211	0.1656	0.1163	0.0908	0.1099
1 day, 20:59:16	35.0	0.0849	0.3800	0.3825	0.3812	0.3825	0.1200	0.3400	0.3312	0.3195	0.3112	0.0859	0.0834	0.0868	0.1132	0.1139	0.1109	0.1105	0.1108	0.1099	0.1237	0.1297	0.2204	0.0904	0.0834	0.0847	0.3950	0.3878	0.3989	0.4007	0.3015	0.4130	0.3879	0.3811	0.3878	0.1492	0.1088	0.0833	0.1310	0.1097	0.1211	0.1247	0.1646	0.1134	0.1228	0.1728	0.1170	0.0907	0.1097
1 day, 21:19:16	35.0	0.0850	0.3807	0.3835	0.3817	0.3833	0.1215	0.3365	0.3254	0.3183	0.3115	0.0860	0.0834	0.0868	0.1133	0.1139	0.1110	0.1104	0.1111	0.1100	0.1250	0.1327	0.2305	0.0903	0.0834	0.0847	0.3984	0.3872	0.4010	0.4000	0.3042	0.4117	0.3885	0.3807	0.3878	0.1505	0.1089	0.0833	0.1336	0.1098	0.1219	0.1265	0.1720	0.1133	0.1250	0.1815	0.1178	0.0908	0.1098
1 day, 21:39:16	35.0	0.0850	0.3814	0.3840	0.3821	0.3831	0.1233	0.3374	0.3559	0.3187	0.3122	0.0858	0.0834	0.0869	0.1133	0.1139	0.1109	0.1105	0.1115	0.1100	0.1264	0.1355	0.2401	0.0905	0.0833	0.0847	0.3971	0.3881	0.3997	0.4005	0.3055	0.4100	0.3889	0.3809	0.3873	0.1524	0.1089	0.0836	0.1366	0.1098	0.1229	0.1294	0.1794	0.1135	0.1276	0.1913	0.1189	0.0908	0.1099
1 day, 21:59:16	35.0	0.0850	0.3818	0.3843	0.3827	0.3839	0.1253	0.3411	0.3308	0.3197	0.3119	0.0857	0.0833	0.0867	0.1134	0.1139	0.1109	0.1106	0.1119	0.1100	0.1280	0.1392	0.2484	0.0905	0.0834	0.0849	0.3979	0.3878	0.4001	0.4011	0.3049	0.4107	0.3887	0.3814	0.3875	0.1537	0.1089	0.0834	0.1401	0.1100	0.1240	0.1312	0.1884	0.1135	0.1307	0.2023	0.1202	0.0908	0.1100
1 day, 22:19:16	35.0	0.0850	0.3818	0.3848	0.3837	0.3843	0.1274	0.3375	0.3255	0.3200	0.3122	0.0855	0.0833	0.0867	0.1135	0.1138	0.1109	0.1102	0.1123	0.1099	0.1295	0.1431	0.2550	0.0904	0.0833	0.0847	0.3987	0.3880	0.4010	0.4002	0.3047	0.4097	0.3889	0.3813	0.3878	0.1545	0.1088	0.0833	0.1441	0.1097	0.1253	0.1339	0.1989	0.1133	0.1342	0.2177	0.1213	0.0908	0.1098
1 day, 22:39:16	35.0	0.0850	0.3828	0.3853	0.3843	0.3847	0.1298	0.3374	0.3246	0.3203	0.3126	0.0854	0.0835	0.0869	0.1134	0.1138	0.1109	0.1101	0.1129	0.1100	0.1318	0.1482	0.2607	0.0904	0.0834	0.0849	0.3997	0.3889	0.4016	0.4013	0.3053	0.4100	0.3890	0.3816	0.3886	0.1554	0.1088	0.0833	0.1489	0.1098	0.1268	0.1414	0.2121	0.1134	0.1383	0.2304	0.1229	0.0909	0.1098
1 day, 22:59:16	35.0	0.0851	0.3832	0.3855	0.3847	0.3855	0.1327	0.3374	0.3247	0.3203	0.3125	0.0852	0.0834	0.0870	0.1137	0.1140	0.1111	0.1103	0.1135	0.1101	0.1343	0.1529	0.2661	0.0905	0.0834	0.0848	0.4011	0.3887	0.4022	0.4012	0.3058	0.4099	0.3895	0.3817	0.3875	0.1559	0.1089	0.0834	0.1538	0.1099	0.1286	0.1439	0.2276	0.1134	0.1432	0.2416	0.1246	0.0908	0.1099
1 day, 23:19:16	35.0	0.0849	0.3836	0.3862	0.3849	0.3858	0.1358	0.3374	0.3254	0.3207	0.3126	0.0850	0.0832	0.0868	0.1136	0.1139	0.1109	0.1102	0.1139	0.1099	0.1367	0.1587	0.2697	0.0903	0.0834	0.0847	0.4030	0.3898	0.4025	0.4016	0.3071	0.4098	0.3900	0.3824	0.3880	0.1557	0.1087	0.0832	0.1593	0.1097	0.1304	0.1456	0.2412	0.1133	0.1487	0.2529	0.1266	0.0907	0.1097
1 day, 23:39:16	35.0	0.0850	0.3842	0.3880	0.3866	0.3879	0.1395	0.3388	0.3249	0.3199	0.3124	0.0849	0.0833	0.0869	0.1138	0.1139	0.1110	0.1102	0.1147	0.1100	0.1402	0.1660	0.2738	0.0903	0.0833	0.0848	0.4028	0.3914	0.4038	0.4006	0.3087	0.4094	0.3904	0.3833	0.3929	0.1561	0.1089	0.0833	0.1657	0.1099	0.1327	0.1506	0.2536	0.1134	0.1555	0.2638	0.1291	0.0907	0.1098
1 day, 23:59:16	35.0	0.0850	0.3968	0.4035	0.4034	0.4045	0.1431	0.3372	0.3255	0.3195	0.3121	0.0847	0.0833	0.0867	0.1138	0.1138	0.1108	0.1101	0.1154	0.1099	0.1431	0.1737	0.2795	0.0902	0.0834	0.0849	0.4270	0.4084	0.4218	0.4167	0.3124	0.4208	0.4042	0.3967	0.4035	0.1567	0.1087	0.0834	0.1724	0.1099	0.1350	0.1553	0.2654	0.1134	0.1616	0.2724	0.1316	0.0908	0.1098
2 days, 0:19:16	35.0	0.0850	0.3996	0.4064	0.4063	0.4081	0.1465	0.3375	0.3344	0.3192	0.3116	0.0845	0.0834	0.0868	0.1138	0.1138	0.1109	0.1101	0.1161	0.1099	0.1463	0.1819	0.2838	0.0901	0.0834	0.0848	0.4293	0.4121	0.4257	0.4220	0.3148	0.4260	0.4091	0.4013	0.4070	0.1567	0.1087	0.0833	0.1798	0.1098	0.1378	0.1604	0.2753	0.1133	0.1681	0.2806	0.1344	0.0907	0.1096
2 days, 0:39:16	35.0	0.0850	0.4011	0.4075	0.4079	0.4095	0.1510	0.3363	0.3430	0.3197	0.3117	0.0844	0.0833	0.0868	0.1140	0.1138	0.1109	0.1101	0.1172	0.1099	0.1505	0.1926	0.2871	0.0903	0.0834	0.0848	0.4315	0.4154	0.4277	0.4237	0.3167	0.4277	0.4101	0.4027	0.4086	0.1571	0.1086	0.0834	0.1891	0.1098	0.1409	0.1668	0.2835	0.1133	0.1752	0.2870	0.1379	0.0907	0.1096
2 days, 0:59:16	35.0	0.0849	0.4012	0.4081	0.4089	0.4098	0.1566	0.3371	0.3409	0.3194	0.3112	0.0841	0.0832	0.0867	0.1141	0.1137	0.1107	0.1099	0.1182	0.1097	0.1554	0.2061	0.2888	0.0900	0.0833	0.0847	0.4363	0.4168	0.4340	0.4250	0.3184	0.4274	0.4112	0.4037	0.4094	0.1570	0.1084	0.0833	0.2003	0.1096	0.1448	0.1734	0.2903	0.1131	0.1825	0.2938	0.1415	0.0905	0.1094
2 days, 1:19:16	35.0	0.0850	0.4013	0.4084	0.4092	0.4101	0.1633	0.3374	0.3241	0.3194	0.3114	0.0842	0.0832	0.0868	0.1143	0.1136	0.1108	0.1099	0.1195	0.1097	0.1618	0.2179	0.2897	0.0901	0.0833	0.0847	0.4345	0.4184	0.4365	0.4246	0.3198	0.4284	0.4117	0.4042	0.4100	0.1574	0.1086	0.0834	0.2146	0.1096	0.1496	0.1846	0.2955	0.1133	0.1928	0.2981	0.1460	0.0905	0.1096
2 days, 1:39:16	35.0	0.0849	0.4010	0.4084	0.4097	0.4111	0.1720	0.3375	0.3240	0.3194	0.3115	0.0840	0.0835	0.0867	0.1146	0.1138	0.1108	0.1100	0.1212	0.1099	0.1691	0.2306	0.2907	0.0901	0.0834	0.0848	0.4423	0.4196	0.4391	0.4260	0.3216	0.4290	0.4125	0.4042	0.4112	0.1581	0.1086	0.0833	0.2263	0.1097	0.1552	0.1915	0.3012	0.1132	0.2076	0.3016	0.1514	0.0906	0.1097
2 days, 1:59:16	35.0	0.0850	0.4008	0.4086	0.4094	0.4113	0.1815	0.3364	0.3369	0.3199	0.3120	0.0839	0.0833	0.0867	0.1148	0.1137	0.1108	0.1101	0.1229	0.1099	0.1777	0.2433	0.2916	0.0901	0.0833	0.0848	0.4363	0.4201	0.4401	0.4269	0.3238	0.4289	0.4134	0.4059	0.4115	0.1585	0.1086	0.0833	0.2389	0.1097	0.1607	0.2026	0.3075	0.1131	0.2190	0.3071	0.1576	0.0906	0.1096
2 days, 2:19:16	35.0	0.0850	0.4011	0.4088	0.4098	0.4112	0.1938	0.3358	0.3236	0.3206	0.3113	0.0837	0.0835	0.0868	0.1152	0.1138	0.1107	0.1102	0.1251	0.1099	0.1880	0.2550	0.2928	0.0902	0.0834	0.0848	0.4371	0.4200	0.4399	0.4285	0.3252	0.4291	0.4138	0.4050	0.4124	0.1590	0.1088	0.0834	0.2509	0.1097	0.1677	0.2163	0.3131	0.1133	0.2274	0.3107	0.1648	0.0907	0.1097
2 days, 2:39:16	35.0	0.0850	0.4005	0.4084	0.4096	0.4117	0.2037	0.3362	0.3237	0.3206	0.3109	0.0834	0.0834	0.0868	0.1155	0.1137	0.1108	0.1100	0.1275	0.1098	0.2006	0.2639	0.2948	0.0900	0.0833	0.0848	0.4371	0.4207	0.4407	0.4268	0.3270	0.4291	0.4135	0.4057	0.4118	0.1600	0.1086	0.0833	0.2614	0.1097	0.1751	0.2311	0.3197	0.1132	0.2368	0.3127	0.1724	0.0905	0.1094
2 days, 2:59:16	35.0	0.0850	0.4004	0.4090	0.4100	0.4110	0.2137	0.3354	0.3239	0.3204	0.3113	0.0834	0.0833	0.0868	0.1159	0.1137	0.1108	0.1100	0.1304	0.1098	0.2129	0.2708	0.2969	0.0901	0.0833	0.0847	0.4399	0.4219	0.4411	0.4274	0.3303	0.4293	0.4138	0.4066	0.4116	0.1618	0.1085	0.0834	0.2695	0.1097	0.1834	0.2458	0.3233	0.1132	0.2462	0.3138	0.1815	0.0906	0.1096
2 days, 3:19:16	35.0	0.0850	0.4002	0.4080	0.4097	0.4115	0.2230	0.3351	0.3235	0.3202	0.3110	0.0832	0.0833	0.0868	0.1164	0.1137	0.1108	0.1100	0.1337	0.1097	0.2248	0.2765	0.2995	0.0899	0.0834	0.0847	0.4383	0.4222	0.4414	0.4281	0.3344	0.4297	0.4143	0.4062	0.4117	0.1671	0.1085	0.0833	0.2763	0.1097	0.1925	0.2595	0.3243	0.1132	0.2538	0.3156	0.1921	0.0905	0.1095
2 days, 3:39:16	35.0	0.0850	0.4001	0.4082	0.4100	0.4113	0.2306	0.3347	0.3235	0.3198	0.3108	0.0831	0.0834	0.0868	0.1169	0.1139	0.1109	0.1101	0.1376	0.1098	0.2376	0.2817	0.3030	0.0901	0.0834	0.0849	0.4384	0.4219	0.4420	0.4284	0.3384	0.4290	0.4140	0.4062	0.4121	0.1703	0.1086	0.0835	0.2826	0.1097	0.2035	0.2691	0.3251	0.1133	0.2606	0.3181	0.2047	0.0906	0.1096
2 days, 3:59:16	35.0	0.0850	0.3995	0.4084	0.4098	0.4112	0.2368	0.3346	0.3239	0.3200	0.3108	0.0829	0.0834	0.0867	0.1175	0.1138	0.1107	0.1100	0.1417	0.1099	0.2492	0.2866	0.3070	0.0899	0.0833	0.0848	0.4381	0.4226	0.4413	0.4278	0.3402	0.4298	0.4144	0.4059	0.4113	0.1718	0.1084	0.0834	0.2883	0.1097	0.2170	0.2789	0.3261	0.1132	0.2666	0.3211	0.2156	0.0905	0.1094
2 days, 4:19:16	35.0	0.0848	0.3997	0.4082	0.4097	0.4114	0.2420	0.3340	0.3236	0.3192	0.3110	0.0827	0.0833	0.0868	0.1181	0.1138	0.1107	0.1099	0.1471	0.1097	0.2593	0.2899	0.3113	0.0898	0.0833	0.0846	0.4370	0.4227	0.4427	0.4271	0.3396	0.4297	0.4136	0.4063	0.4114	0.1721	0.1084	0.0832	0.2935	0.1096	0.2318	0.2893	0.3274	0.1132	0.2721	0.3247	0.2272	0.0905	0.1095
[truncated: 48 more columns]

## Sheet: Fig 6 - fig sup 3, cell lenght
NAME	ASSOCIATION	EXPERIMENT	IMAGE	LOCATION	POSITION	SHAPE	SHAPE.area	SHAPE.length	ZSCORE
b4	0	Fperrara_SingleCell_Microscopy	fp_wt_img1.tif	(x=39.43 y=831.67)	1	1	690.5127	38.87537	5.180576
b5	0	Fperrara_SingleCell_Microscopy	fp_wt_img1.tif	(x=55.29 y=695.28)	1	1	711.9785	33.62229	4.081878
b8	0	Fperrara_SingleCell_Microscopy	fp_wt_img1.tif	(x=64.35 y=150.24)	1	1	383.42676	23.67089	5.3058047
b11	0	Fperrara_SingleCell_Microscopy	fp_wt_img1.tif	(x=104.17 y=545.48)	1	1	311.4043	20.21402	5.020748
b12	0	Fperrara_SingleCell_Microscopy	fp_wt_img1.tif	(x=116.83 y=25.81)	1	1	130.71094	14.64213	4.0468187
b15	0	Fperrara_SingleCell_Microscopy	fp_wt_img1.tif	(x=196.47 y=1326.90)	1	1	368.3047	21.990103	5.0413046
b16	0	Fperrara_SingleCell_Microscopy	fp_wt_img1.tif	(x=209.18 y=365.27)	1	1	475.92188	38.747814	4.8408294
b19	0	Fperrara_SingleCell_Microscopy	fp_wt_img1.tif	(x=235.52 y=1681.97)	1	1	1237.7344	103.62317	4.5684366
b20	0	Fperrara_SingleCell_Microscopy	fp_wt_img1.tif	(x=212.86 y=101.66)	1	1	532.2676	33.264343	5.535195
b21	0	Fperrara_SingleCell_Microscopy	fp_wt_img1.tif	(x=243.87 y=1181.44)	1	1	802.375	51.922447	5.2731056
b23	0	Fperrara_SingleCell_Microscopy	fp_wt_img1.tif	(x=311.72 y=978.83)	1	1	524.4844	30.526844	5.6605234
b24	0	Fperrara_SingleCell_Microscopy	fp_wt_img1.tif	(x=316.48 y=1338.91)	1	1	505.875	27.979084	5.6344304
b26	0	Fperrara_SingleCell_Microscopy	fp_wt_img1.tif	(x=334.39 y=164.66)	1	1	356.04688	22.181465	5.2691355
b27	0	Fperrara_SingleCell_Microscopy	fp_wt_img1.tif	(x=355.68 y=1041.49)	1	1	351.0	24.853195	5.142029
b28	0	Fperrara_SingleCell_Microscopy	fp_wt_img1.tif	(x=356.76 y=2034.00)	1	1	281.15625	20.11335	5.1006346
b30	0	Fperrara_SingleCell_Microscopy	fp_wt_img1.tif	(x=389.57 y=530.98)	1	1	1107.5469	68.684105	4.2146587
b31	0	Fperrara_SingleCell_Microscopy	fp_wt_img1.tif	(x=395.35 y=467.22)	1	1	399.23438	30.946014	5.293502
b33	0	Fperrara_SingleCell_Microscopy	fp_wt_img1.tif	(x=419.32 y=1203.24)	1	1	595.8906	43.030354	5.4503384
b34	0	Fperrara_SingleCell_Microscopy	fp_wt_img1.tif	(x=419.87 y=1388.31)	1	1	128.0	14.455932	4.0477443
b35	0	Fperrara_SingleCell_Microscopy	fp_wt_img1.tif	(x=446.99 y=1407.34)	1	1	548.9375	33.305717	5.5119996
b39	0	Fperrara_SingleCell_Microscopy	fp_wt_img1.tif	(x=469.99 y=122.17)	1	1	143.48438	14.307069	4.452343
b40	0	Fperrara_SingleCell_Microscopy	fp_wt_img1.tif	(x=491.18 y=810.87)	1	1	486.76562	32.087498	5.7381206
b41	0	Fperrara_SingleCell_Microscopy	fp_wt_img1.tif	(x=487.13 y=1593.45)	1	1	278.71875	22.190786	5.100283
b44	0	Fperrara_SingleCell_Microscopy	fp_wt_img1.tif	(x=512.89 y=1359.88)	1	1	707.34375	40.36371	5.8023
b45	0	Fperrara_SingleCell_Microscopy	fp_wt_img1.tif	(x=508.42 y=898.59)	1	1	203.42188	16.385044	4.6232605
b46	0	Fperrara_SingleCell_Microscopy	fp_wt_img1.tif	(x=512.83 y=1930.38)	1	1	319.8125	25.454325	4.6256666
b47	0	Fperrara_SingleCell_Microscopy	fp_wt_img1.tif	(x=514.59 y=952.21)	1	1	303.73438	22.887827	5.3466845
b50	0	Fperrara_SingleCell_Microscopy	fp_wt_img1.tif	(x=546.74 y=1810.69)	1	1	428.625	26.525724	5.4742656
b51	0	Fperrara_SingleCell_Microscopy	fp_wt_img1.tif	(x=564.53 y=638.49)	1	1	398.35938	32.108814	5.4059453
b54	0	Fperrara_SingleCell_Microscopy	fp_wt_img1.tif	(x=613.02 y=351.13)	1	1	570.9375	37.907745	5.654664
b57	0	Fperrara_SingleCell_Microscopy	fp_wt_img1.tif	(x=619.00 y=1346.02)	1	1	337.4375	26.404299	5.427163
b59	0	Fperrara_SingleCell_Microscopy	fp_wt_img1.tif	(x=624.41 y=1136.04)	1	1	204.65625	18.555033	5.1903214
b60	0	Fperrara_SingleCell_Microscopy	fp_wt_img1.tif	(x=634.43 y=1220.81)	1	1	435.09375	26.816479	5.6285496
b62	0	Fperrara_SingleCell_Microscopy	fp_wt_img1.tif	(x=661.54 y=1480.80)	1	1	530.3125	40.75059	5.415458
b67	0	Fperrara_SingleCell_Microscopy	fp_wt_img1.tif	(x=676.52 y=635.96)	1	1	347.57812	22.894892	5.72813
b68	0	Fperrara_SingleCell_Microscopy	fp_wt_img1.tif	(x=685.19 y=1403.97)	1	1	870.40625	52.93749	5.349729
b69	0	Fperrara_SingleCell_Microscopy	fp_wt_img1.tif	(x=692.13 y=711.01)	1	1	442.14062	32.751934	5.7754393
b71	0	Fperrara_SingleCell_Microscopy	fp_wt_img1.tif	(x=723.43 y=136.89)	1	1	367.0625	21.81708	5.830241
b72	0	Fperrara_SingleCell_Microscopy	fp_wt_img1.tif	(x=751.34 y=522.03)	1	1	153.85938	13.895247	4.1191797
b73	0	Fperrara_SingleCell_Microscopy	fp_wt_img1.tif	(x=769.36 y=142.05)	1	1	713.7383	55.110134	5.4276586
b75	0	Fperrara_SingleCell_Microscopy	fp_wt_img1.tif	(x=765.70 y=879.41)	1	1	472.59375	28.416906	5.9374084
b77	0	Fperrara_SingleCell_Microscopy	fp_wt_img1.tif	(x=773.66 y=1501.89)	1	1	474.4375	26.759647	6.09282
b79	0	Fperrara_SingleCell_Microscopy	fp_wt_img1.tif	(x=785.11 y=670.54)	1	1	348.32812	23.028496	5.500783
b80	0	Fperrara_SingleCell_Microscopy	fp_wt_img1.tif	(x=792.15 y=516.07)	1	1	254.29688	19.453213	5.6534452
b81	0	Fperrara_SingleCell_Microscopy	fp_wt_img1.tif	(x=824.33 y=1234.05)	1	1	877.15625	65.63986	5.5223765
b82	0	Fperrara_SingleCell_Microscopy	fp_wt_img1.tif	(x=810.16 y=1759.61)	1	1	538.75	41.387505	5.4345193
b85	0	Fperrara_SingleCell_Microscopy	fp_wt_img1.tif	(x=858.47 y=934.22)	1	1	617.28125	44.555862	5.85356
b88	0	Fperrara_SingleCell_Microscopy	fp_wt_img1.tif	(x=878.94 y=1284.37)	1	1	445.4375	33.19971	5.5265713
b89	0	Fperrara_SingleCell_Microscopy	fp_wt_img1.tif	(x=897.66 y=718.75)	1	1	258.3125	19.789646	5.489973
b96	0	Fperrara_SingleCell_Microscopy	fp_wt_img1.tif	(x=968.35 y=456.96)	1	1	446.48438	33.09036	5.5493946
b103	0	Fperrara_SingleCell_Microscopy	fp_wt_img1.tif	(x=1004.21 y=1758.84)	1	1	415.625	34.778496	5.5877957
b104	0	Fperrara_SingleCell_Microscopy	fp_wt_img1.tif	(x=996.66 y=651.38)	1	1	253.03125	18.846622	5.6687655
b106	0	Fperrara_SingleCell_Microscopy	fp_wt_img1.tif	(x=1006.84 y=211.13)	1	1	452.04688	30.040966	5.523118
b107	0	Fperrara_SingleCell_Microscopy	fp_wt_img1.tif	(x=1002.43 y=1053.51)	1	1	175.03125	17.434172	4.185693
b111	0	Fperrara_SingleCell_Microscopy	fp_wt_img1.tif	(x=1028.37 y=1023.86)	1	1	87.375	11.052968	4.4982853
b112	0	Fperrara_SingleCell_Microscopy	fp_wt_img1.tif	(x=1041.38 y=11.74)	1	1	362.54443	23.660263	6.2192287
b115	0	Fperrara_SingleCell_Microscopy	fp_wt_img1.tif	(x=1080.37 y=1720.21)	1	1	290.25	24.980185	5.4265037
b117	0	Fperrara_SingleCell_Microscopy	fp_wt_img1.tif	(x=1111.28 y=216.92)	1	1	539.5156	28.710596	6.203851
b119	0	Fperrara_SingleCell_Microscopy	fp_wt_img1.tif	(x=1118.77 y=1097.68)	1	1	97.25	12.417771	4.1174803
b121	0	Fperrara_SingleCell_Microscopy	fp_wt_img1.tif	(x=1123.73 y=28.25)	1	1	205.94043	21.126923	5.189457
b124	0	Fperrara_SingleCell_Microscopy	fp_wt_img1.tif	(x=1159.93 y=347.34)	1	1	179.8125	19.369009	4.0056043
b126	0	Fperrara_SingleCell_Microscopy	fp_wt_img1.tif	(x=1180.47 y=1458.82)	1	1	567.6875	37.042343	6.1898365
b128	0	Fperrara_SingleCell_Microscopy	fp_wt_img1.tif	(x=1174.79 y=1288.95)	1	1	296.25	23.20863	5.7608066
b130	0	Fperrara_SingleCell_Microscopy	fp_wt_img1.tif	(x=1197.71 y=622.16)	1	1	496.28125	28.47254	6.1498246
b131	0	Fperrara_SingleCell_Microscopy	fp_wt_img1.tif	(x=1216.16 y=1006.98)	1	1	442.0	35.076138	6.165788
b134	0	Fperrara_SingleCell_Microscopy	fp_wt_img1.tif	(x=1227.78 y=491.36)	1	1	186.75	22.61181	5.929734
b135	0	Fperrara_SingleCell_Microscopy	fp_wt_img1.tif	(x=1236.41 y=388.61)	1	1	379.26562	25.31313	6.035775
b137	0	Fperrara_SingleCell_Microscopy	fp_wt_img1.tif	(x=1245.32 y=880.61)	1	1	351.0	22.875908	5.9967914
b139	0	Fperrara_SingleCell_Microscopy	fp_wt_img1.tif	(x=1263.81 y=605.64)	1	1	740.46875	36.560104	5.9099097
b141	0	Fperrara_SingleCell_Microscopy	fp_wt_img1.tif	(x=1265.12 y=1796.96)	1	1	253.75	18.80303	6.144249
b145	0	Fperrara_SingleCell_Microscopy	fp_wt_img1.tif	(x=1301.38 y=1066.43)	1	1	399.1875	28.822294	6.163513
b146	0	Fperrara_SingleCell_Microscopy	fp_wt_img1.tif	(x=1303.71 y=1715.87)	1	1	466.0	30.866646	6.0980124
b147	0	Fperrara_SingleCell_Microscopy	fp_wt_img1.tif	(x=1374.35 y=377.71)	1	1	322.28125	21.830967	6.065883
b148	0	Fperrara_SingleCell_Microscopy	fp_wt_img1.tif	(x=1386.32 y=717.49)	1	1	448.75	31.301558	6.344612
b149	0	Fperrara_SingleCell_Microscopy	fp_wt_img1.tif	(x=1381.62 y=284.98)	1	1	396.8125	31.65475	5.801168
b151	0	Fperrara_SingleCell_Microscopy	fp_wt_img1.tif	(x=1411.87 y=1383.88)	1	1	345.75	22.548244	6.132089
b153	0	Fperrara_SingleCell_Microscopy	fp_wt_img1.tif	(x=1438.22 y=913.51)	1	1	127.4375	18.998785	4.274093
b156	0	Fperrara_SingleCell_Microscopy	fp_wt_img1.tif	(x=1444.67 y=143.08)	1	1	233.10156	20.895378	4.5702896
b157	0	Fperrara_SingleCell_Microscopy	fp_wt_img1.tif	(x=1461.39 y=1282.25)	1	1	589.75	39.60576	6.1442904
b161	0	Fperrara_SingleCell_Microscopy	fp_wt_img1.tif	(x=1482.88 y=1833.63)	1	1	343.125	21.246223	6.4226036
b163	0	Fperrara_SingleCell_Microscopy	fp_wt_img1.tif	(x=1546.78 y=1267.99)	1	1	818.1875	56.87633	5.8651614
b166	0	Fperrara_SingleCell_Microscopy	fp_wt_img1.tif	(x=1576.66 y=1152.10)	1	1	1166.6875	86.43758	5.899006
b169	0	Fperrara_SingleCell_Microscopy	fp_wt_img1.tif	(x=1576.30 y=387.67)	1	1	512.6875	30.43828	6.666819
b170	0	Fperrara_SingleCell_Microscopy	fp_wt_img1.tif	(x=1572.06 y=186.73)	1	1	245.26562	18.182205	6.0823507
b171	0	Fperrara_SingleCell_Microscopy	fp_wt_img1.tif	(x=1593.30 y=741.65)	1	1	624.3125	37.38877	6.4248643
b174	0	Fperrara_SingleCell_Microscopy	fp_wt_img1.tif	(x=1648.08 y=1399.84)	1	1	100.0	13.861809	4.963241
b175	0	Fperrara_SingleCell_Microscopy	fp_wt_img1.tif	(x=1678.46 y=726.79)	1	1	463.5	34.929867	6.1508327
b177	0	Fperrara_SingleCell_Microscopy	fp_wt_img1.tif	(x=1699.65 y=1688.24)	1	1	330.25	36.520847	4.188597
b178	0	Fperrara_SingleCell_Microscopy	fp_wt_img1.tif	(x=1708.59 y=1406.45)	1	1	560.25	33.649384	6.381833
b179	0	Fperrara_SingleCell_Microscopy	fp_wt_img1.tif	(x=1708.51 y=356.29)	1	1	493.375	25.850008	6.4563107
b180	0	Fperrara_SingleCell_Microscopy	fp_wt_img1.tif	(x=1718.56 y=1925.07)	1	1	651.25	39.9873	6.305397
b183	0	Fperrara_SingleCell_Microscopy	fp_wt_img1.tif	(x=1734.96 y=1313.20)	1	1	402.0	27.250443	5.0013127
b185	0	Fperrara_SingleCell_Microscopy	fp_wt_img1.tif	(x=1751.79 y=898.55)	1	1	223.5625	16.876831	6.3000636
b186	0	Fperrara_SingleCell_Microscopy	fp_wt_img1.tif	(x=1754.66 y=1440.80)	1	1	99.375	15.437174	4.4257026
b189	0	Fperrara_SingleCell_Microscopy	fp_wt_img1.tif	(x=1799.86 y=1409.01)	1	1	1160.375	65.78711	5.4682207
b190	0	Fperrara_SingleCell_Microscopy	fp_wt_img1.tif	(x=1787.07 y=1255.92)	1	1	350.25	22.492664	5.2891817
b192	0	Fperrara_SingleCell_Microscopy	fp_wt_img1.tif	(x=1788.92 y=175.44)	1	1	162.875	19.335333	5.7550707
b193	0	Fperrara_SingleCell_Microscopy	fp_wt_img1.tif	(x=1796.50 y=79.40)	1	1	354.85938	22.52263	6.626342
b197	0	Fperrara_SingleCell_Microscopy	fp_wt_img1.tif	(x=1850.30 y=1818.65)	1	1	296.25	20.82309	6.192206
b199	0	Fperrara_SingleCell_Microscopy	fp_wt_img1.tif	(x=1882.91 y=1152.40)	1	1	957.5	62.51329	6.3157263
b207	0	Fperrara_SingleCell_Microscopy	fp_wt_img1.tif	(x=1950.99 y=2035.12)	1	1	338.5	21.578182	6.797611
b208	0	Fperrara_SingleCell_Microscopy	fp_wt_img1.tif	(x=1965.93 y=504.93)	1	1	435.84375	32.88229	6.2232046
b209	0	Fperrara_SingleCell_Microscopy	fp_wt_img1.tif	(x=1982.08 y=957.09)	1	1	476.125	35.33845	6.231881
b210	0	Fperrara_SingleCell_Microscopy	fp_wt_img1.tif	(x=1982.68 y=1929.32)	1	1	294.5	21.216536	6.4549155
b213	0	Fperrara_SingleCell_Microscopy	fp_wt_img1.tif	(x=2001.53 y=1469.98)	1	1	372.375	23.62262	6.269917
b215	0	Fperrara_SingleCell_Microscopy	fp_wt_img1.tif	(x=2032.83 y=1677.50)	1	1	176.375	15.494004	5.528574
b221	0	Fperrara_SingleCell_Microscopy	fp_wt_img1.tif	(x=115.10 y=1727.47)	1	1	453.5078	33.374977	5.279444
b222	0	Fperrara_SingleCell_Microscopy	fp_wt_img1.tif	(x=107.84 y=1744.52)	1	1	140.53906	18.732828	4.0940576
b232	0	Fperrara_SingleCell_Microscopy	fp_wt_img1.tif	(x=1114.30 y=1064.96)	1	1	461.5	34.51287	5.106024
b234	0	Fperrara_SingleCell_Microscopy	fp_wt_img1.tif	(x=1106.32 y=1073.25)	1	1	104.0625	12.781492	4.197906
b237	0	Fperrara_SingleCell_Microscopy	fp_wt_img1.tif	(x=1135.29 y=326.25)	1	1	334.73438	35.772655	4.5604024
b248	0	Fperrara_SingleCell_Microscopy	fp_wt_img1.tif	(x=1829.44 y=1430.32)	1	1	114.75	18.31561	4.049076
b251	0	Fperrara_SingleCell_Microscopy	fp_wt_img1.tif	(x=1898.36 y=434.26)	1	1	788.90625	56.251827	5.826299
b252	0	Fperrara_SingleCell_Microscopy	fp_wt_img1.tif	(x=1916.99 y=439.28)	1	1	275.0	20.6343	5.8021717
b22	0	Fperrara_SingleCell_Microscopy	fp_wt_img2.tif	(x=69.00 y=909.77)	1	1	267.51953	20.556831	5.4067087
b45	0	Fperrara_SingleCell_Microscopy	fp_wt_img2.tif	(x=131.58 y=684.01)	1	1	353.57812	25.811552	5.465872
b51	0	Fperrara_SingleCell_Microscopy	fp_wt_img2.tif	(x=154.80 y=83.93)	1	1	459.75635	30.376795	5.6549573
b54	0	Fperrara_SingleCell_Microscopy	fp_wt_img2.tif	(x=165.21 y=494.59)	1	1	356.67578	23.72439	5.6285243
b68	0	Fperrara_SingleCell_Microscopy	fp_wt_img2.tif	(x=231.59 y=618.16)	1	1	613.5781	30.406458	5.4511905
b73	0	Fperrara_SingleCell_Microscopy	fp_wt_img2.tif	(x=251.24 y=1873.27)	1	1	396.46875	30.416103	4.5806804
b74	0	Fperrara_SingleCell_Microscopy	fp_wt_img2.tif	(x=257.72 y=1016.02)	1	1	532.5156	36.00723	5.0460396
b83	0	Fperrara_SingleCell_Microscopy	fp_wt_img2.tif	(x=299.58 y=91.07)	1	1	686.25977	47.227764	5.473933
b84	0	Fperrara_SingleCell_Microscopy	fp_wt_img2.tif	(x=297.84 y=1141.20)	1	1	636.1094	41.351646	5.5868697
b85	0	Fperrara_SingleCell_Microscopy	fp_wt_img2.tif	(x=293.29 y=598.15)	1	1	369.67188	24.756353	5.3739214
b89	0	Fperrara_SingleCell_Microscopy	fp_wt_img2.tif	(x=317.42 y=1465.57)	1	1	551.9375	35.444283	5.400039
b102	0	Fperrara_SingleCell_Microscopy	fp_wt_img2.tif	(x=359.25 y=981.97)	1	1	252.79688	18.637259	5.293253
b107	0	Fperrara_SingleCell_Microscopy	fp_wt_img2.tif	(x=374.96 y=178.95)	1	1	573.49023	36.00612	5.552665
b134	0	Fperrara_SingleCell_Microscopy	fp_wt_img2.tif	(x=482.56 y=841.92)	1	1	647.8906	33.783882	5.512184
b154	0	Fperrara_SingleCell_Microscopy	fp_wt_img2.tif	(x=545.02 y=164.03)	1	1	339.8086	24.795967	5.474238
b159	0	Fperrara_SingleCell_Microscopy	fp_wt_img2.tif	(x=553.10 y=637.71)	1	1	313.04688	20.513306	5.364016
b160	0	Fperrara_SingleCell_Microscopy	fp_wt_img2.tif	(x=567.01 y=1892.76)	1	1	778.78125	56.495003	5.2155714
b188	0	Fperrara_SingleCell_Microscopy	fp_wt_img2.tif	(x=603.07 y=846.34)	1	1	937.53125	43.24034	5.4341426
b200	0	Fperrara_SingleCell_Microscopy	fp_wt_img2.tif	(x=612.95 y=1251.12)	1	1	564.75	39.70351	5.304604
b203	0	Fperrara_SingleCell_Microscopy	fp_wt_img2.tif	(x=618.95 y=419.84)	1	1	335.5078	28.145185	5.4514484
b220	0	Fperrara_SingleCell_Microscopy	fp_wt_img2.tif	(x=688.99 y=1870.81)	1	1	410.4375	25.689684	5.137081
b233	0	Fperrara_SingleCell_Microscopy	fp_wt_img2.tif	(x=759.03 y=598.50)	1	1	448.5	30.456324	5.5091166
b236	0	Fperrara_SingleCell_Microscopy	fp_wt_img2.tif	(x=777.88 y=1080.71)	1	1	691.84375	40.004547	5.6205063
b241	0	Fperrara_SingleCell_Microscopy	fp_wt_img2.tif	(x=780.61 y=1943.93)	1	1	199.6875	17.761103	4.935934
b242	0	Fperrara_SingleCell_Microscopy	fp_wt_img2.tif	(x=790.78 y=1226.53)	1	1	593.34375	41.520485	5.0734873
b249	0	Fperrara_SingleCell_Microscopy	fp_wt_img2.tif	(x=810.98 y=949.68)	1	1	386.15625	22.992867	5.2979608
b253	0	Fperrara_SingleCell_Microscopy	fp_wt_img2.tif	(x=840.86 y=1978.06)	1	1	219.875	17.793081	5.111255
b254	0	Fperrara_SingleCell_Microscopy	fp_wt_img2.tif	(x=860.39 y=206.19)	1	1	704.4844	33.007374	5.5546584
b257	0	Fperrara_SingleCell_Microscopy	fp_wt_img2.tif	(x=873.56 y=1860.01)	1	1	610.875	33.79522	5.2235928
b267	0	Fperrara_SingleCell_Microscopy	fp_wt_img2.tif	(x=923.32 y=407.30)	1	1	553.8906	28.439558	5.4725857
b270	0	Fperrara_SingleCell_Microscopy	fp_wt_img2.tif	(x=938.92 y=96.69)	1	1	756.7031	53.002716	5.270646
b277	0	Fperrara_SingleCell_Microscopy	fp_wt_img2.tif	(x=966.81 y=1105.06)	1	1	437.28125	28.184053	5.370508
b281	0	Fperrara_SingleCell_Microscopy	fp_wt_img2.tif	(x=971.63 y=2024.14)	1	1	380.25	26.644724	5.1003003
b283	0	Fperrara_SingleCell_Microscopy	fp_wt_img2.tif	(x=976.05 y=330.18)	1	1	270.42188	20.33901	5.1568613
b284	0	Fperrara_SingleCell_Microscopy	fp_wt_img2.tif	(x=1011.65 y=1760.57)	1	1	691.875	48.805412	4.1710105
b286	0	Fperrara_SingleCell_Microscopy	fp_wt_img2.tif	(x=1017.68 y=601.05)	1	1	487.15625	30.791515	5.4284186
b293	0	Fperrara_SingleCell_Microscopy	fp_wt_img2.tif	(x=1039.43 y=446.00)	1	1	355.125	23.446363	5.2572327
b294	0	Fperrara_SingleCell_Microscopy	fp_wt_img2.tif	(x=1048.97 y=1014.00)	1	1	886.3125	59.634666	4.9963574
b303	0	Fperrara_SingleCell_Microscopy	fp_wt_img2.tif	(x=1109.96 y=680.39)	1	1	970.625	68.11338	5.2434793
b307	0	Fperrara_SingleCell_Microscopy	fp_wt_img2.tif	(x=1121.79 y=142.97)	1	1	446.59375	26.109854	5.625648
b308	0	Fperrara_SingleCell_Microscopy	fp_wt_img2.tif	(x=1129.54 y=1159.47)	1	1	365.75	24.926847	5.089127
b309	0	Fperrara_SingleCell_Microscopy	fp_wt_img2.tif	(x=1160.85 y=794.58)	1	1	345.53125	21.904299	4.775028
b310	0	Fperrara_SingleCell_Microscopy	fp_wt_img2.tif	(x=1162.77 y=1325.01)	1	1	208.5	15.971478	5.052546
b311	0	Fperrara_SingleCell_Microscopy	fp_wt_img2.tif	(x=1198.23 y=744.64)	1	1	535.8125	38.16658	5.1608415
b312	0	Fperrara_SingleCell_Microscopy	fp_wt_img2.tif	(x=1196.90 y=607.77)	1	1	267.84375	21.011997	4.9200206
b313	0	Fperrara_SingleCell_Microscopy	fp_wt_img2.tif	(x=1217.88 y=490.85)	1	1	444.71875	33.447277	5.010421
b315	0	Fperrara_SingleCell_Microscopy	fp_wt_img2.tif	(x=1245.07 y=2030.76)	1	1	370.125	22.139315	4.946578
b319	0	Fperrara_SingleCell_Microscopy	fp_wt_img2.tif	(x=1306.79 y=589.99)	1	1	621.34375	45.037685	4.9961796
b320	0	Fperrara_SingleCell_Microscopy	fp_wt_img2.tif	(x=1302.55 y=241.41)	1	1	515.0	36.576183	4.9650135
b322	0	Fperrara_SingleCell_Microscopy	fp_wt_img2.tif	(x=1327.36 y=991.34)	1	1	236.5625	18.5647	4.8553944
b329	0	Fperrara_SingleCell_Microscopy	fp_wt_img2.tif	(x=1396.17 y=1961.64)	1	1	385.125	26.39966	4.523413
b331	0	Fperrara_SingleCell_Microscopy	fp_wt_img2.tif	(x=1408.40 y=1124.05)	1	1	232.0625	19.848612	4.4178333
b335	0	Fperrara_SingleCell_Microscopy	fp_wt_img2.tif	(x=1448.69 y=852.09)	1	1	249.25	23.532618	4.3696065
b336	0	Fperrara_SingleCell_Microscopy	fp_wt_img2.tif	(x=1486.79 y=221.30)	1	1	833.9219	59.80363	5.112113
b337	0	Fperrara_SingleCell_Microscopy	fp_wt_img2.tif	(x=1469.93 y=1154.17)	1	1	294.0625	21.37258	4.724551
b338	0	Fperrara_SingleCell_Microscopy	fp_wt_img2.tif	(x=1477.11 y=1405.08)	1	1	156.0	14.890235	4.3475423
b339	0	Fperrara_SingleCell_Microscopy	fp_wt_img2.tif	(x=1495.18 y=1281.58)	1	1	191.625	17.069351	4.266746
b341	0	Fperrara_SingleCell_Microscopy	fp_wt_img2.tif	(x=1528.55 y=704.54)	1	1	257.4375	19.182695	5.1428723
b342	0	Fperrara_SingleCell_Microscopy	fp_wt_img2.tif	(x=1535.61 y=902.61)	1	1	292.1875	20.32372	4.9616427
b343	0	Fperrara_SingleCell_Microscopy	fp_wt_img2.tif	(x=1540.77 y=1929.24)	1	1	509.875	33.23143	4.379762
b344	0	Fperrara_SingleCell_Microscopy	fp_wt_img2.tif	(x=1581.70 y=72.73)	1	1	2097.3047	110.22385	5.2775707
b345	0	Fperrara_SingleCell_Microscopy	fp_wt_img2.tif	(x=1610.57 y=1058.69)	1	1	482.9375	31.395658	4.6261263
b346	0	Fperrara_SingleCell_Microscopy	fp_wt_img2.tif	(x=1611.84 y=956.63)	1	1	241.5	21.585472	4.2769823
b347	0	Fperrara_SingleCell_Microscopy	fp_wt_img2.tif	(x=1666.73 y=1341.36)	1	1	429.125	24.115923	4.6986103
b349	0	Fperrara_SingleCell_Microscopy	fp_wt_img2.tif	(x=1691.94 y=749.85)	1	1	840.9375	50.17377	4.7559667
b350	0	Fperrara_SingleCell_Microscopy	fp_wt_img2.tif	(x=1678.25 y=1224.06)	1	1	240.1875	18.739431	4.1941056
b351	0	Fperrara_SingleCell_Microscopy	fp_wt_img2.tif	(x=1722.46 y=1128.34)	1	1	458.5	26.049196	4.6391735
b352	0	Fperrara_SingleCell_Microscopy	fp_wt_img2.tif	(x=1760.25 y=546.23)	1	1	521.9375	36.752438	4.8864255
b353	0	Fperrara_SingleCell_Microscopy	fp_wt_img2.tif	(x=1765.87 y=1385.96)	1	1	324.75	25.59698	4.197222
b354	0	Fperrara_SingleCell_Microscopy	fp_wt_img2.tif	(x=1786.48 y=1115.71)	1	1	191.1875	18.026903	4.130389
b355	0	Fperrara_SingleCell_Microscopy	fp_wt_img2.tif	(x=1813.15 y=116.20)	1	1	559.22656	37.758892	5.2632775
b357	0	Fperrara_SingleCell_Microscopy	fp_wt_img2.tif	(x=1897.30 y=1285.69)	1	1	254.625	22.723408	4.04579
b358	0	Fperrara_SingleCell_Microscopy	fp_wt_img2.tif	(x=1918.13 y=252.17)	1	1	385.76562	24.678398	4.8674135
b359	0	Fperrara_SingleCell_Microscopy	fp_wt_img2.tif	(x=1924.24 y=1689.64)	1	1	173.25	16.323727	4.023819
b360	0	Fperrara_SingleCell_Microscopy	fp_wt_img2.tif	(x=1934.68 y=1455.37)	1	1	296.375	27.762564	4.0905347
b362	0	Fperrara_SingleCell_Microscopy	fp_wt_img2.tif	(x=1990.08 y=1575.64)	1	1	246.25	19.429054	4.3957624
b364	0	Fperrara_SingleCell_Microscopy	fp_wt_img2.tif	(x=2008.83 y=558.85)	1	1	371.1875	22.561563	4.7215295
b365	0	Fperrara_SingleCell_Microscopy	fp_wt_img2.tif	(x=2027.76 y=1853.92)	1	1	235.75	18.48377	4.2870283
b384	0	Fperrara_SingleCell_Microscopy	fp_wt_img2.tif	(x=1356.26 y=1114.68)	1	1	687.625	41.694324	5.035797
b385	0	Fperrara_SingleCell_Microscopy	fp_wt_img2.tif	(x=1363.62 y=1135.12)	1	1	157.5	14.277857	4.6250834
b2	0	Fperrara_SingleCell_Microscopy	fp_wt_img3.tif	(x=17.71 y=1532.18)	1	1	396.5896	25.05458	6.3515005
b5	0	Fperrara_SingleCell_Microscopy	fp_wt_img3.tif	(x=48.08 y=1521.64)	1	1	130.82812	19.227215	4.653816
b8	0	Fperrara_SingleCell_Microscopy	fp_wt_img3.tif	(x=80.90 y=964.29)	1	1	84.77734	11.1223955	4.0927353
b11	0	Fperrara_SingleCell_Microscopy	fp_wt_img3.tif	(x=114.37 y=534.12)	1	1	356.14844	21.453611	6.168469
b16	0	Fperrara_SingleCell_Microscopy	fp_wt_img3.tif	(x=176.59 y=882.26)	1	1	497.1172	28.932566	6.8359714
b18	0	Fperrara_SingleCell_Microscopy	fp_wt_img3.tif	(x=196.80 y=302.11)	1	1	745.5625	59.934517	5.886751
b20	0	Fperrara_SingleCell_Microscopy	fp_wt_img3.tif	(x=262.04 y=1675.21)	1	1	465.90625	31.555866	6.298662
b22	0	Fperrara_SingleCell_Microscopy	fp_wt_img3.tif	(x=306.46 y=1789.61)	1	1	470.45312	32.09106	6.669747
b23	0	Fperrara_SingleCell_Microscopy	fp_wt_img3.tif	(x=315.81 y=1538.29)	1	1	421.98438	23.371132	6.421342
b24	0	Fperrara_SingleCell_Microscopy	fp_wt_img3.tif	(x=329.17 y=1000.62)	1	1	1005.65625	62.67461	6.0159254
b25	0	Fperrara_SingleCell_Microscopy	fp_wt_img3.tif	(x=345.71 y=2031.90)	1	1	293.03125	19.580395	6.0087924
b31	0	Fperrara_SingleCell_Microscopy	fp_wt_img3.tif	(x=407.63 y=1198.99)	1	1	408.5625	33.485413	6.349924
b32	0	Fperrara_SingleCell_Microscopy	fp_wt_img3.tif	(x=426.55 y=791.15)	1	1	482.67188	35.648212	6.420338
b37	0	Fperrara_SingleCell_Microscopy	fp_wt_img3.tif	(x=511.19 y=1175.22)	1	1	300.78125	28.4259	4.810774
b41	0	Fperrara_SingleCell_Microscopy	fp_wt_img3.tif	(x=559.26 y=1047.64)	1	1	531.1875	35.147068	6.9698815
b45	0	Fperrara_SingleCell_Microscopy	fp_wt_img3.tif	(x=601.15 y=719.00)	1	1	77.828125	10.43442	5.4010105
b46	0	Fperrara_SingleCell_Microscopy	fp_wt_img3.tif	(x=615.20 y=1858.08)	1	1	333.6875	22.079987	6.7119937
b47	0	Fperrara_SingleCell_Microscopy	fp_wt_img3.tif	(x=625.14 y=1074.82)	1	1	481.8125	37.846943	4.59088
b49	0	Fperrara_SingleCell_Microscopy	fp_wt_img3.tif	(x=634.54 y=777.36)	1	1	801.7031	50.590008	6.4937544
b50	0	Fperrara_SingleCell_Microscopy	fp_wt_img3.tif	(x=646.74 y=555.26)	1	1	357.96875	23.436972	6.395829
b54	0	Fperrara_SingleCell_Microscopy	fp_wt_img3.tif	(x=675.89 y=590.33)	1	1	203.82812	21.257547	4.2244053
b55	0	Fperrara_SingleCell_Microscopy	fp_wt_img3.tif	(x=677.27 y=1826.50)	1	1	454.9375	26.643494	6.3502398
b61	0	Fperrara_SingleCell_Microscopy	fp_wt_img3.tif	(x=718.49 y=343.72)	1	1	80.39844	11.575508	5.110604
b62	0	Fperrara_SingleCell_Microscopy	fp_wt_img3.tif	(x=730.63 y=1974.87)	1	1	210.6875	16.735754	6.244076
b68	0	Fperrara_SingleCell_Microscopy	fp_wt_img3.tif	(x=847.39 y=1585.80)	1	1	196.1875	17.070385	4.553788
b69	0	Fperrara_SingleCell_Microscopy	fp_wt_img3.tif	(x=867.40 y=997.56)	1	1	333.78125	24.991045	6.5582447
b70	0	Fperrara_SingleCell_Microscopy	fp_wt_img3.tif	(x=874.44 y=1724.35)	1	1	326.9375	20.975773	6.546752
b81	0	Fperrara_SingleCell_Microscopy	fp_wt_img3.tif	(x=967.60 y=1278.33)	1	1	115.1875	16.430326	5.8679924
b82	0	Fperrara_SingleCell_Microscopy	fp_wt_img3.tif	(x=979.97 y=1744.23)	1	1	410.25	28.496841	6.9128575
b83	0	Fperrara_SingleCell_Microscopy	fp_wt_img3.tif	(x=1016.77 y=1112.51)	1	1	704.4375	31.465769	6.9171414
b85	0	Fperrara_SingleCell_Microscopy	fp_wt_img3.tif	(x=1020.74 y=206.41)	1	1	259.47656	22.375347	6.543512
b86	0	Fperrara_SingleCell_Microscopy	fp_wt_img3.tif	(x=1016.75 y=610.95)	1	1	88.15625	13.084418	5.527345
b87	0	Fperrara_SingleCell_Microscopy	fp_wt_img3.tif	(x=1073.29 y=2023.91)	1	1	357.125	21.74872	7.09219
b88	0	Fperrara_SingleCell_Microscopy	fp_wt_img3.tif	(x=1106.69 y=966.11)	1	1	388.0625	23.802052	6.833061
b92	0	Fperrara_SingleCell_Microscopy	fp_wt_img3.tif	(x=1168.68 y=1807.40)	1	1	816.3125	62.546173	6.4416313
b93	0	Fperrara_SingleCell_Microscopy	fp_wt_img3.tif	(x=1180.44 y=914.09)	1	1	493.4375	26.571932	6.2866373
b95	0	Fperrara_SingleCell_Microscopy	fp_wt_img3.tif	(x=1196.64 y=705.59)	1	1	810.03125	65.46231	6.4501204
b97	0	Fperrara_SingleCell_Microscopy	fp_wt_img3.tif	(x=1221.10 y=245.41)	1	1	415.59375	32.37202	6.2122016
b98	0	Fperrara_SingleCell_Microscopy	fp_wt_img3.tif	(x=1242.91 y=1993.66)	1	1	714.25	57.188988	6.263488
b100	0	Fperrara_SingleCell_Microscopy	fp_wt_img3.tif	(x=1246.18 y=966.66)	1	1	543.5	33.070286	6.990785
b104	0	Fperrara_SingleCell_Microscopy	fp_wt_img3.tif	(x=1317.71 y=1071.76)	1	1	370.75	28.721497	4.506973
b105	0	Fperrara_SingleCell_Microscopy	fp_wt_img3.tif	(x=1379.14 y=1812.23)	1	1	305.75	21.69391	6.6868343
b106	0	Fperrara_SingleCell_Microscopy	fp_wt_img3.tif	(x=1387.42 y=1270.66)	1	1	292.4375	20.936434	6.4866405
b107	0	Fperrara_SingleCell_Microscopy	fp_wt_img3.tif	(x=1389.16 y=1096.08)	1	1	412.0	23.423447	7.3473234
b108	0	Fperrara_SingleCell_Microscopy	fp_wt_img3.tif	(x=1403.46 y=1891.09)	1	1	341.625	24.5415	7.1455474
b110	0	Fperrara_SingleCell_Microscopy	fp_wt_img3.tif	(x=1446.74 y=1161.14)	1	1	299.875	20.466835	6.8279233
b111	0	Fperrara_SingleCell_Microscopy	fp_wt_img3.tif	(x=1451.37 y=748.71)	1	1	253.3125	20.060326	6.55547
b113	0	Fperrara_SingleCell_Microscopy	fp_wt_img3.tif	(x=1472.28 y=1534.65)	1	1	304.375	19.547503	6.641949
b114	0	Fperrara_SingleCell_Microscopy	fp_wt_img3.tif	(x=1500.35 y=679.23)	1	1	396.84375	30.189528	6.636842
b115	0	Fperrara_SingleCell_Microscopy	fp_wt_img3.tif	(x=1502.43 y=1559.51)	1	1	174.0	17.34846	4.8110147
b116	0	Fperrara_SingleCell_Microscopy	fp_wt_img3.tif	(x=1509.60 y=1575.21)	1	1	130.125	14.597385	5.0553584
b117	0	Fperrara_SingleCell_Microscopy	fp_wt_img3.tif	(x=1531.95 y=32.88)	1	1	256.9707	30.538448	4.628825
b118	0	Fperrara_SingleCell_Microscopy	fp_wt_img3.tif	(x=1591.51 y=1516.50)	1	1	79.5	13.339057	4.3370376
b119	0	Fperrara_SingleCell_Microscopy	fp_wt_img3.tif	(x=1616.59 y=1001.53)	1	1	529.25	29.158392	7.1134768
b120	0	Fperrara_SingleCell_Microscopy	fp_wt_img3.tif	(x=1618.36 y=1639.92)	1	1	430.375	27.263985	6.6349173
b121	0	Fperrara_SingleCell_Microscopy	fp_wt_img3.tif	(x=1644.18 y=1776.82)	1	1	630.125	47.093178	6.620792
b125	0	Fperrara_SingleCell_Microscopy	fp_wt_img3.tif	(x=1780.48 y=487.83)	1	1	768.5	31.84874	5.309377
b126	0	Fperrara_SingleCell_Microscopy	fp_wt_img3.tif	(x=1792.94 y=1741.53)	1	1	591.875	37.411793	6.6439395
b127	0	Fperrara_SingleCell_Microscopy	fp_wt_img3.tif	(x=1798.23 y=1150.60)	1	1	402.625	26.73282	4.949537
b130	0	Fperrara_SingleCell_Microscopy	fp_wt_img3.tif	(x=1861.41 y=1143.57)	1	1	264.5	19.538942	6.5104504
b131	0	Fperrara_SingleCell_Microscopy	fp_wt_img3.tif	(x=1887.07 y=968.94)	1	1	778.6875	32.68855	5.9694505
b132	0	Fperrara_SingleCell_Microscopy	fp_wt_img3.tif	(x=1896.63 y=1787.52)	1	1	255.5	18.375238	6.644912
b133	0	Fperrara_SingleCell_Microscopy	fp_wt_img3.tif	(x=1921.28 y=540.04)	1	1	342.5	24.17196	5.9366336
b136	0	Fperrara_SingleCell_Microscopy	fp_wt_img3.tif	(x=1980.74 y=955.31)	1	1	387.3125	27.935938	5.780672
b143	0	Fperrara_SingleCell_Microscopy	fp_wt_img3.tif	(x=2017.03 y=339.49)	1	1	343.03125	28.521818	6.6049514
b148	0	Fperrara_SingleCell_Microscopy	fp_wt_img3.tif	(x=622.31 y=1454.47)	1	1	395.9375	31.68568	4.1738553
b149	0	Fperrara_SingleCell_Microscopy	fp_wt_img3.tif	(x=635.51 y=1430.50)	1	1	348.8125	21.477316	6.2243066
b151	0	Fperrara_SingleCell_Microscopy	fp_wt_img3.tif	(x=1710.27 y=600.04)	1	1	446.34375	37.928303	6.0835247
b152	0	Fperrara_SingleCell_Microscopy	fp_wt_img3.tif	(x=1728.82 y=613.85)	1	1	263.65625	20.246864	6.3075137
b154	0	Fperrara_SingleCell_Microscopy	fp_wt_img3.tif	(x=1736.03 y=591.50)	1	1	80.1875	11.105702	5.2793965
b155	0	Fperrara_SingleCell_Microscopy	fp_wt_img3.tif	(x=1755.77 y=587.38)	1	1	289.875	28.579672	5.4170055
b156	0	Fperrara_SingleCell_Microscopy	fp_wt_img3.tif	(x=1840.07 y=1743.34)	1	1	113.875	12.671976	4.688979
b158	0	Fperrara_SingleCell_Microscopy	fp_wt_img3.tif	(x=2018.24 y=751.69)	1	1	317.9375	29.416304	5.8892937
b159	0	Fperrara_SingleCell_Microscopy	fp_wt_img3.tif	(x=2034.34 y=749.44)	1	1	155.6875	16.440687	5.9961615
b60	0	Fperrara_SingleCell_Microscopy	fp_wt_img4.tif	(x=30.44 y=484.19)	1	1	402.90527	23.84518	4.3772955
b61	0	Fperrara_SingleCell_Microscopy	fp_wt_img4.tif	(x=32.65 y=1331.23)	1	1	457.59375	26.873772	4.3805494
b65	0	Fperrara_SingleCell_Microscopy	fp_wt_img4.tif	(x=33.91 y=591.05)	1	1	399.13428	22.649641	4.415713
b166	0	Fperrara_SingleCell_Microscopy	fp_wt_img4.tif	(x=95.63 y=366.93)	1	1	625.4492	32.05458	4.7663665
b201	0	Fperrara_SingleCell_Microscopy	fp_wt_img4.tif	(x=112.46 y=419.28)	1	1	346.5078	24.276178	4.1586237
b230	0	Fperrara_SingleCell_Microscopy	fp_wt_img4.tif	(x=145.12 y=669.31)	1	1	705.08203	49.43256	4.4641066
b247	0	Fperrara_SingleCell_Microscopy	fp_wt_img4.tif	(x=144.38 y=1240.92)	1	1	493.48438	28.329151	4.3937335
b283	0	Fperrara_SingleCell_Microscopy	fp_wt_img4.tif	(x=173.69 y=1853.69)	1	1	422.17188	32.044804	4.3504124
b305	0	Fperrara_SingleCell_Microscopy	fp_wt_img4.tif	(x=202.43 y=959.06)	1	1	445.57812	31.054245	4.2121663
b322	0	Fperrara_SingleCell_Microscopy	fp_wt_img4.tif	(x=226.06 y=426.08)	1	1	601.2031	30.496847	4.283406
b337	0	Fperrara_SingleCell_Microscopy	fp_wt_img4.tif	(x=234.21 y=657.47)	1	1	504.90625	27.022055	4.514494
b341	0	Fperrara_SingleCell_Microscopy	fp_wt_img4.tif	(x=246.18 y=1993.04)	1	1	935.65625	43.88877	4.3671327
b353	0	Fperrara_SingleCell_Microscopy	fp_wt_img4.tif	(x=249.76 y=1692.07)	1	1	304.21875	21.903994	4.1861057
b356	0	Fperrara_SingleCell_Microscopy	fp_wt_img4.tif	(x=260.80 y=562.53)	1	1	532.71094	34.5952	4.416753
b369	0	Fperrara_SingleCell_Microscopy	fp_wt_img4.tif	(x=287.65 y=1019.47)	1	1	819.75	39.752323	4.9452252
b385	0	Fperrara_SingleCell_Microscopy	fp_wt_img4.tif	(x=313.06 y=103.56)	1	1	436.98535	25.608839	4.4056206
b397	0	Fperrara_SingleCell_Microscopy	fp_wt_img4.tif	(x=332.71 y=675.91)	1	1	1620.3906	86.58394	4.1055694
b399	0	Fperrara_SingleCell_Microscopy	fp_wt_img4.tif	(x=338.06 y=1603.87)	1	1	460.4375	29.073616	4.539302
b403	0	Fperrara_SingleCell_Microscopy	fp_wt_img4.tif	(x=344.84 y=1948.37)	1	1	350.90625	23.580227	4.2890897
b439	0	Fperrara_SingleCell_Microscopy	fp_wt_img4.tif	(x=424.67 y=914.26)	1	1	418.57812	24.671423	4.7268953
b443	0	Fperrara_SingleCell_Microscopy	fp_wt_img4.tif	(x=435.69 y=554.35)	1	1	402.9922	28.638351	4.233094
b457	0	Fperrara_SingleCell_Microscopy	fp_wt_img4.tif	(x=483.87 y=1643.65)	1	1	582.09375	42.754913	4.383508
b463	0	Fperrara_SingleCell_Microscopy	fp_wt_img4.tif	(x=491.14 y=1899.44)	1	1	301.53125	21.40749	4.212662
b469	0	Fperrara_SingleCell_Microscopy	fp_wt_img4.tif	(x=542.06 y=227.62)	1	1	1169.9297	76.53098	4.1545563
b492	0	Fperrara_SingleCell_Microscopy	fp_wt_img4.tif	(x=575.37 y=1059.46)	1	1	435.375	28.19992	4.686918
b494	0	Fperrara_SingleCell_Microscopy	fp_wt_img4.tif	(x=577.00 y=978.55)	1	1	374.40625	21.970297	4.666837
b498	0	Fperrara_SingleCell_Microscopy	fp_wt_img4.tif	(x=598.34 y=1806.30)	1	1	669.53125	42.365482	4.4597054
b508	0	Fperrara_SingleCell_Microscopy	fp_wt_img4.tif	(x=664.73 y=1758.61)	1	1	338.875	25.91993	4.0718985
b512	0	Fperrara_SingleCell_Microscopy	fp_wt_img4.tif	(x=685.35 y=1835.81)	1	1	443.375	27.47374	4.5292897
b520	0	Fperrara_SingleCell_Microscopy	fp_wt_img4.tif	(x=742.94 y=1001.06)	1	1	862.59375	61.47742	4.5394893
b530	0	Fperrara_SingleCell_Microscopy	fp_wt_img4.tif	(x=803.26 y=1936.45)	1	1	1140.75	62.243164	4.273377
b533	0	Fperrara_SingleCell_Microscopy	fp_wt_img4.tif	(x=793.60 y=1767.26)	1	1	236.0	20.128628	4.1222825
b538	0	Fperrara_SingleCell_Microscopy	fp_wt_img4.tif	(x=826.58 y=1771.77)	1	1	546.375	36.89917	4.5730925
b539	0	Fperrara_SingleCell_Microscopy	fp_wt_img4.tif	(x=857.20 y=1244.25)	1	1	1009.875	66.175224	4.452676
b543	0	Fperrara_SingleCell_Microscopy	fp_wt_img4.tif	(x=876.76 y=464.88)	1	1	543.4531	37.669243	4.345054
b545	0	Fperrara_SingleCell_Microscopy	fp_wt_img4.tif	(x=890.59 y=1484.41)	1	1	445.125	27.398438	4.6559567
b547	0	Fperrara_SingleCell_Microscopy	fp_wt_img4.tif	(x=929.21 y=684.62)	1	1	317.125	20.670813	4.4997272
b548	0	Fperrara_SingleCell_Microscopy	fp_wt_img4.tif	(x=932.57 y=943.90)	1	1	463.3125	39.332344	4.522961
b553	0	Fperrara_SingleCell_Microscopy	fp_wt_img4.tif	(x=1010.84 y=1637.45)	1	1	363.875	22.857521	4.1857634
b556	0	Fperrara_SingleCell_Microscopy	fp_wt_img4.tif	(x=1028.79 y=151.68)	1	1	979.53906	65.59132	4.080742
b558	0	Fperrara_SingleCell_Microscopy	fp_wt_img4.tif	(x=1047.44 y=1031.27)	1	1	647.0	32.88816	4.847498
b559	0	Fperrara_SingleCell_Microscopy	fp_wt_img4.tif	(x=1056.03 y=1177.06)	1	1	236.8125	19.17105	4.491831
b560	0	Fperrara_SingleCell_Microscopy	fp_wt_img4.tif	(x=1070.82 y=430.71)	1	1	409.5	27.18736	4.4637547
b561	0	Fperrara_SingleCell_Microscopy	fp_wt_img4.tif	(x=1080.94 y=304.96)	1	1	804.125	50.461704	4.0426283
b562	0	Fperrara_SingleCell_Microscopy	fp_wt_img4.tif	(x=1078.89 y=881.78)	1	1	470.8125	30.30683	4.6739583
b563	0	Fperrara_SingleCell_Microscopy	fp_wt_img4.tif	(x=1087.12 y=1785.06)	1	1	643.875	34.83748	4.3567286
b565	0	Fperrara_SingleCell_Microscopy	fp_wt_img4.tif	(x=1115.79 y=676.03)	1	1	392.375	27.802673	4.4366593
b566	0	Fperrara_SingleCell_Microscopy	fp_wt_img4.tif	(x=1120.84 y=1459.82)	1	1	754.0	37.310467	4.6268744
b570	0	Fperrara_SingleCell_Microscopy	fp_wt_img4.tif	(x=1227.36 y=997.57)	1	1	643.375	36.44587	4.2781672
b573	0	Fperrara_SingleCell_Microscopy	fp_wt_img4.tif	(x=1241.35 y=1106.19)	1	1	315.3125	20.297277	4.449752
b574	0	Fperrara_SingleCell_Microscopy	fp_wt_img4.tif	(x=1240.80 y=141.79)	1	1	248.66406	18.005892	4.4107122
b577	0	Fperrara_SingleCell_Microscopy	fp_wt_img4.tif	(x=1276.62 y=1381.60)	1	1	824.1875	43.616764	4.2613177
b579	0	Fperrara_SingleCell_Microscopy	fp_wt_img4.tif	(x=1331.03 y=839.08)	1	1	414.0625	26.783312	4.420683
b581	0	Fperrara_SingleCell_Microscopy	fp_wt_img4.tif	(x=1402.17 y=1306.47)	1	1	376.125	24.119837	4.5879984
b582	0	Fperrara_SingleCell_Microscopy	fp_wt_img4.tif	(x=1414.68 y=1772.77)	1	1	208.375	16.509665	4.0984006
b583	0	Fperrara_SingleCell_Microscopy	fp_wt_img4.tif	(x=1417.26 y=1614.10)	1	1	314.375	20.822174	4.4910817
b584	0	Fperrara_SingleCell_Microscopy	fp_wt_img4.tif	(x=1424.00 y=343.72)	1	1	225.78125	18.552597	4.093531
b588	0	Fperrara_SingleCell_Microscopy	fp_wt_img4.tif	(x=1518.76 y=1143.67)	1	1	1382.5625	46.359745	4.195899
b589	0	Fperrara_SingleCell_Microscopy	fp_wt_img4.tif	(x=1513.84 y=284.74)	1	1	326.34375	22.748335	4.4823885
b590	0	Fperrara_SingleCell_Microscopy	fp_wt_img4.tif	(x=1549.71 y=1246.54)	1	1	409.0625	28.799358	4.341396
b591	0	Fperrara_SingleCell_Microscopy	fp_wt_img4.tif	(x=1574.75 y=240.49)	1	1	204.34375	17.578066	4.302331
b592	0	Fperrara_SingleCell_Microscopy	fp_wt_img4.tif	(x=1604.60 y=1687.97)	1	1	307.875	20.476	4.18052
b594	0	Fperrara_SingleCell_Microscopy	fp_wt_img4.tif	(x=1648.50 y=1178.42)	1	1	695.1875	43.29578	4.0315776
b595	0	Fperrara_SingleCell_Microscopy	fp_wt_img4.tif	(x=1662.95 y=630.95)	1	1	518.65625	29.607244	4.3952184
b597	0	Fperrara_SingleCell_Microscopy	fp_wt_img4.tif	(x=1695.93 y=890.81)	1	1	268.9375	19.398466	4.1576467
b600	0	Fperrara_SingleCell_Microscopy	fp_wt_img4.tif	(x=1714.75 y=1258.09)	1	1	348.5	25.109365	4.3196106
b601	0	Fperrara_SingleCell_Microscopy	fp_wt_img4.tif	(x=1713.77 y=561.08)	1	1	664.53125	43.26471	4.0918984
b602	0	Fperrara_SingleCell_Microscopy	fp_wt_img4.tif	(x=1721.94 y=778.88)	1	1	422.125	25.865992	4.214934
b603	0	Fperrara_SingleCell_Microscopy	fp_wt_img4.tif	(x=1736.14 y=1396.99)	1	1	375.5	24.027174	4.1615295
b604	0	Fperrara_SingleCell_Microscopy	fp_wt_img4.tif	(x=1770.71 y=250.63)	1	1	348.10938	23.26279	4.3321476
b607	0	Fperrara_SingleCell_Microscopy	fp_wt_img4.tif	(x=1800.86 y=154.52)	1	1	244.90625	17.929182	4.557433
b608	0	Fperrara_SingleCell_Microscopy	fp_wt_img4.tif	(x=1822.82 y=1622.67)	1	1	424.5	29.65572	4.0498195
b609	0	Fperrara_SingleCell_Microscopy	fp_wt_img4.tif	(x=1840.10 y=348.43)	1	1	473.875	29.76727	4.5148463
b610	0	Fperrara_SingleCell_Microscopy	fp_wt_img4.tif	(x=1847.33 y=201.24)	1	1	428.59375	33.558403	4.2871137
b611	0	Fperrara_SingleCell_Microscopy	fp_wt_img4.tif	(x=1851.04 y=426.70)	1	1	255.9375	22.119339	4.206631
b612	0	Fperrara_SingleCell_Microscopy	fp_wt_img4.tif	(x=1885.00 y=188.43)	1	1	432.76562	24.787344	4.2318416
b633	0	Fperrara_SingleCell_Microscopy	fp_wt_img4.tif	(x=191.13 y=917.53)	1	1	1197.2266	66.36634	4.1967807
b3	0	Fperrara_SingleCell_Microscopy	fp_ihfa_img1.tif	(x=14.54 y=895.86)	1	1	271.88135	20.469252	5.1104302
b4	0	Fperrara_SingleCell_Microscopy	fp_ihfa_img1.tif	(x=17.62 y=1169.11)	1	1	560.95605	46.310146	4.7247167
b10	0	Fperrara_SingleCell_Microscopy	fp_ihfa_img1.tif	(x=76.18 y=1499.18)	1	1	564.89453	34.422234	5.110462
b11	0	Fperrara_SingleCell_Microscopy	fp_ihfa_img1.tif	(x=85.75 y=1369.97)	1	1	967.77734	49.245613	5.051246
b12	0	Fperrara_SingleCell_Microscopy	fp_ihfa_img1.tif	(x=94.71 y=588.26)	1	1	673.0703	40.016254	5.4987435
b13	0	Fperrara_SingleCell_Microscopy	fp_ihfa_img1.tif	(x=101.81 y=193.16)	1	1	304.36523	23.524975	5.514579
b14	0	Fperrara_SingleCell_Microscopy	fp_ihfa_img1.tif	(x=120.51 y=47.66)	1	1	1451.1957	55.162712	5.4394526
b15	0	Fperrara_SingleCell_Microscopy	fp_ihfa_img1.tif	(x=107.28 y=448.67)	1	1	191.5957	16.88309	5.2156467
b17	0	Fperrara_SingleCell_Microscopy	fp_ihfa_img1.tif	(x=115.56 y=291.15)	1	1	603.6084	38.68361	4.929795
b18	0	Fperrara_SingleCell_Microscopy	fp_ihfa_img1.tif	(x=140.11 y=1472.38)	1	1	265.0625	20.201008	5.102561
b19	0	Fperrara_SingleCell_Microscopy	fp_ihfa_img1.tif	(x=142.90 y=1232.28)	1	1	78.89844	10.437863	4.057091
b21	0	Fperrara_SingleCell_Microscopy	fp_ihfa_img1.tif	(x=171.92 y=469.96)	1	1	318.5078	20.871387	5.4948726
b22	0	Fperrara_SingleCell_Microscopy	fp_ihfa_img1.tif	(x=176.79 y=1154.46)	1	1	454.53906	32.996964	5.2922134
b24	0	Fperrara_SingleCell_Microscopy	fp_ihfa_img1.tif	(x=229.53 y=74.63)	1	1	1640.4478	81.87045	5.273732
b25	0	Fperrara_SingleCell_Microscopy	fp_ihfa_img1.tif	(x=219.65 y=1961.98)	1	1	491.1875	31.759264	5.2364254
b28	0	Fperrara_SingleCell_Microscopy	fp_ihfa_img1.tif	(x=308.95 y=1870.67)	1	1	307.9375	23.358158	4.921209
b29	0	Fperrara_SingleCell_Microscopy	fp_ihfa_img1.tif	(x=311.78 y=1325.93)	1	1	387.42188	22.725079	5.755459
b30	0	Fperrara_SingleCell_Microscopy	fp_ihfa_img1.tif	(x=344.40 y=1241.51)	1	1	291.9375	22.687634	5.38333
b31	0	Fperrara_SingleCell_Microscopy	fp_ihfa_img1.tif	(x=344.40 y=293.68)	1	1	551.0039	33.327126	6.067741
b32	0	Fperrara_SingleCell_Microscopy	fp_ihfa_img1.tif	(x=359.34 y=1788.59)	1	1	292.0	23.286789	5.089675
b33	0	Fperrara_SingleCell_Microscopy	fp_ihfa_img1.tif	(x=380.03 y=1908.27)	1	1	368.46875	24.5427	5.256799
b34	0	Fperrara_SingleCell_Microscopy	fp_ihfa_img1.tif	(x=398.94 y=363.42)	1	1	477.42188	36.295082	5.8169274
b35	0	Fperrara_SingleCell_Microscopy	fp_ihfa_img1.tif	(x=401.06 y=436.83)	1	1	502.7422	37.347267	5.747527
b37	0	Fperrara_SingleCell_Microscopy	fp_ihfa_img1.tif	(x=435.09 y=301.01)	1	1	564.08203	32.9714	6.02772
b38	0	Fperrara_SingleCell_Microscopy	fp_ihfa_img1.tif	(x=433.06 y=517.03)	1	1	773.9531	53.9133	5.460785
b40	0	Fperrara_SingleCell_Microscopy	fp_ihfa_img1.tif	(x=436.55 y=1061.61)	1	1	295.67188	23.39509	5.554572
b41	0	Fperrara_SingleCell_Microscopy	fp_ihfa_img1.tif	(x=449.14 y=147.98)	1	1	385.59375	31.954353	5.693873
b42	0	Fperrara_SingleCell_Microscopy	fp_ihfa_img1.tif	(x=467.60 y=603.99)	1	1	618.0781	46.43058	6.0814877
b43	0	Fperrara_SingleCell_Microscopy	fp_ihfa_img1.tif	(x=502.52 y=2001.54)	1	1	542.34375	41.329037	5.210759
b44	0	Fperrara_SingleCell_Microscopy	fp_ihfa_img1.tif	(x=499.00 y=771.04)	1	1	447.23438	27.713467	6.0401516
b45	0	Fperrara_SingleCell_Microscopy	fp_ihfa_img1.tif	(x=518.93 y=1701.83)	1	1	830.15625	59.092224	5.189834
b46	0	Fperrara_SingleCell_Microscopy	fp_ihfa_img1.tif	(x=512.96 y=1365.25)	1	1	208.71875	18.33782	5.392898
b48	0	Fperrara_SingleCell_Microscopy	fp_ihfa_img1.tif	(x=578.02 y=1511.68)	1	1	268.71875	19.884176	5.5855503
b49	0	Fperrara_SingleCell_Microscopy	fp_ihfa_img1.tif	(x=578.55 y=1324.21)	1	1	225.8125	17.341822	4.6849656
b50	0	Fperrara_SingleCell_Microscopy	fp_ihfa_img1.tif	(x=586.37 y=1038.81)	1	1	482.34375	24.95459	6.224136
b51	0	Fperrara_SingleCell_Microscopy	fp_ihfa_img1.tif	(x=612.98 y=558.08)	1	1	375.57812	25.987532	5.8229175
b52	0	Fperrara_SingleCell_Microscopy	fp_ihfa_img1.tif	(x=645.67 y=1492.65)	1	1	406.6875	25.332947	5.7472916
b53	0	Fperrara_SingleCell_Microscopy	fp_ihfa_img1.tif	(x=649.02 y=683.97)	1	1	270.32812	24.15535	5.666286
b54	0	Fperrara_SingleCell_Microscopy	fp_ihfa_img1.tif	(x=666.56 y=646.60)	1	1	317.45312	23.130714	5.915614
b55	0	Fperrara_SingleCell_Microscopy	fp_ihfa_img1.tif	(x=690.20 y=848.59)	1	1	1008.90625	42.85939	4.8489976
b58	0	Fperrara_SingleCell_Microscopy	fp_ihfa_img1.tif	(x=729.93 y=1866.72)	1	1	779.4375	50.88236	5.517406
b59	0	Fperrara_SingleCell_Microscopy	fp_ihfa_img1.tif	(x=719.19 y=1235.66)	1	1	125.125	14.87369	4.265631
b62	0	Fperrara_SingleCell_Microscopy	fp_ihfa_img1.tif	(x=800.48 y=442.47)	1	1	495.375	33.832115	5.8947787
b63	0	Fperrara_SingleCell_Microscopy	fp_ihfa_img1.tif	(x=798.61 y=296.06)	1	1	270.2578	21.227884	5.6747994
b64	0	Fperrara_SingleCell_Microscopy	fp_ihfa_img1.tif	(x=801.37 y=1954.56)	1	1	285.1875	26.128674	5.296387
b65	0	Fperrara_SingleCell_Microscopy	fp_ihfa_img1.tif	(x=809.28 y=23.76)	1	1	483.0288	36.220005	6.075543
b66	0	Fperrara_SingleCell_Microscopy	fp_ihfa_img1.tif	(x=840.95 y=622.13)	1	1	365.82812	23.021246	4.685731
b67	0	Fperrara_SingleCell_Microscopy	fp_ihfa_img1.tif	(x=848.02 y=1183.09)	1	1	579.4375	39.465164	4.987173
b68	0	Fperrara_SingleCell_Microscopy	fp_ihfa_img1.tif	(x=875.40 y=653.63)	1	1	589.375	49.39999	4.8852377
b69	0	Fperrara_SingleCell_Microscopy	fp_ihfa_img1.tif	(x=876.95 y=1309.71)	1	1	261.75	25.455574	5.0363183
b72	0	Fperrara_SingleCell_Microscopy	fp_ihfa_img1.tif	(x=914.23 y=1973.17)	1	1	369.5625	28.523838	5.125369
b75	0	Fperrara_SingleCell_Microscopy	fp_ihfa_img1.tif	(x=943.78 y=478.69)	1	1	815.125	56.268856	5.84868
b76	0	Fperrara_SingleCell_Microscopy	fp_ihfa_img1.tif	(x=930.72 y=1565.67)	1	1	388.8125	26.008423	5.837908
b77	0	Fperrara_SingleCell_Microscopy	fp_ihfa_img1.tif	(x=960.90 y=1155.24)	1	1	1002.5625	42.545906	5.823275
b79	0	Fperrara_SingleCell_Microscopy	fp_ihfa_img1.tif	(x=981.74 y=430.82)	1	1	491.84375	35.242542	5.8600965
b80	0	Fperrara_SingleCell_Microscopy	fp_ihfa_img1.tif	(x=1010.93 y=1815.77)	1	1	1172.5	52.85299	5.2347665
b81	0	Fperrara_SingleCell_Microscopy	fp_ihfa_img1.tif	(x=1008.79 y=1907.27)	1	1	229.75	18.845108	5.6477084
b82	0	Fperrara_SingleCell_Microscopy	fp_ihfa_img1.tif	(x=1051.66 y=540.47)	1	1	863.5	43.926365	5.270157
b84	0	Fperrara_SingleCell_Microscopy	fp_ihfa_img1.tif	(x=1068.80 y=483.01)	1	1	211.46875	17.105646	5.722773
b85	0	Fperrara_SingleCell_Microscopy	fp_ihfa_img1.tif	(x=1122.92 y=851.69)	1	1	453.75	29.037302	6.2676806
b86	0	Fperrara_SingleCell_Microscopy	fp_ihfa_img1.tif	(x=1128.12 y=1614.61)	1	1	644.0	36.552166	6.0738873
b87	0	Fperrara_SingleCell_Microscopy	fp_ihfa_img1.tif	(x=1126.11 y=1663.77)	1	1	372.0	31.002466	4.734166
b88	0	Fperrara_SingleCell_Microscopy	fp_ihfa_img1.tif	(x=1142.08 y=1960.46)	1	1	556.5	31.073515	6.4277587
b89	0	Fperrara_SingleCell_Microscopy	fp_ihfa_img1.tif	(x=1149.44 y=1384.50)	1	1	462.875	32.62533	5.971741
b90	0	Fperrara_SingleCell_Microscopy	fp_ihfa_img1.tif	(x=1158.14 y=1037.67)	1	1	331.9375	24.34107	5.801319
b91	0	Fperrara_SingleCell_Microscopy	fp_ihfa_img1.tif	(x=1201.42 y=824.67)	1	1	199.09375	16.657887	5.031843
b92	0	Fperrara_SingleCell_Microscopy	fp_ihfa_img1.tif	(x=1201.93 y=640.92)	1	1	180.09375	17.877	5.317982
b93	0	Fperrara_SingleCell_Microscopy	fp_ihfa_img1.tif	(x=1216.94 y=1847.01)	1	1	347.5	25.817871	6.186612
b94	0	Fperrara_SingleCell_Microscopy	fp_ihfa_img1.tif	(x=1234.51 y=1664.27)	1	1	694.0625	52.939316	5.65053
b95	0	Fperrara_SingleCell_Microscopy	fp_ihfa_img1.tif	(x=1237.11 y=626.88)	1	1	287.96875	20.600729	5.6172833
b96	0	Fperrara_SingleCell_Microscopy	fp_ihfa_img1.tif	(x=1243.15 y=460.41)	1	1	477.375	40.65186	5.284704
b97	0	Fperrara_SingleCell_Microscopy	fp_ihfa_img1.tif	(x=1242.89 y=1108.00)	1	1	778.1875	50.05666	5.9877524
b99	0	Fperrara_SingleCell_Microscopy	fp_ihfa_img1.tif	(x=1294.37 y=927.85)	1	1	452.375	29.302689	4.4378757
b100	0	Fperrara_SingleCell_Microscopy	fp_ihfa_img1.tif	(x=1299.13 y=447.89)	1	1	333.1875	23.541456	5.988039
b101	0	Fperrara_SingleCell_Microscopy	fp_ihfa_img1.tif	(x=1299.93 y=543.20)	1	1	511.84375	27.340082	5.8607755
b102	0	Fperrara_SingleCell_Microscopy	fp_ihfa_img1.tif	(x=1325.08 y=1883.61)	1	1	692.625	39.747738	6.0561023
b103	0	Fperrara_SingleCell_Microscopy	fp_ihfa_img1.tif	(x=1319.56 y=1569.60)	1	1	356.625	22.687235	5.75873
b104	0	Fperrara_SingleCell_Microscopy	fp_ihfa_img1.tif	(x=1360.53 y=980.29)	1	1	539.625	37.10791	6.0761046
b106	0	Fperrara_SingleCell_Microscopy	fp_ihfa_img1.tif	(x=1363.94 y=1976.91)	1	1	291.875	24.15732	5.6018257
b107	0	Fperrara_SingleCell_Microscopy	fp_ihfa_img1.tif	(x=1364.61 y=1731.98)	1	1	483.875	32.29572	5.886355
b108	0	Fperrara_SingleCell_Microscopy	fp_ihfa_img1.tif	(x=1371.98 y=1363.17)	1	1	476.0	25.43851	6.190113
b109	0	Fperrara_SingleCell_Microscopy	fp_ihfa_img1.tif	(x=1388.97 y=380.09)	1	1	382.0	24.45904	5.315882
b110	0	Fperrara_SingleCell_Microscopy	fp_ihfa_img1.tif	(x=1390.89 y=1573.17)	1	1	313.5	26.364086	5.1460967
b112	0	Fperrara_SingleCell_Microscopy	fp_ihfa_img1.tif	(x=1405.23 y=934.46)	1	1	467.375	37.00013	5.710784
b113	0	Fperrara_SingleCell_Microscopy	fp_ihfa_img1.tif	(x=1419.40 y=90.40)	1	1	411.5547	27.637133	5.4281964
b114	0	Fperrara_SingleCell_Microscopy	fp_ihfa_img1.tif	(x=1450.68 y=1120.62)	1	1	795.0625	60.790215	5.866952
b117	0	Fperrara_SingleCell_Microscopy	fp_ihfa_img1.tif	(x=1473.22 y=1889.91)	1	1	465.125	27.754747	5.9830914
b118	0	Fperrara_SingleCell_Microscopy	fp_ihfa_img1.tif	(x=1475.36 y=343.52)	1	1	255.35938	20.867714	4.5854726
b121	0	Fperrara_SingleCell_Microscopy	fp_ihfa_img1.tif	(x=1522.98 y=1010.29)	1	1	1010.5	51.182518	4.6281166
b122	0	Fperrara_SingleCell_Microscopy	fp_ihfa_img1.tif	(x=1525.27 y=730.72)	1	1	292.9375	21.190033	5.691243
b123	0	Fperrara_SingleCell_Microscopy	fp_ihfa_img1.tif	(x=1565.03 y=369.00)	1	1	474.3125	30.500025	5.7503295
b124	0	Fperrara_SingleCell_Microscopy	fp_ihfa_img1.tif	(x=1561.08 y=668.81)	1	1	328.25	27.13962	5.215698
b125	0	Fperrara_SingleCell_Microscopy	fp_ihfa_img1.tif	(x=1565.79 y=1593.66)	1	1	578.875	39.69225	5.7590275
b126	0	Fperrara_SingleCell_Microscopy	fp_ihfa_img1.tif	(x=1613.36 y=1524.19)	1	1	231.5	20.390451	5.749138
b127	0	Fperrara_SingleCell_Microscopy	fp_ihfa_img1.tif	(x=1616.35 y=1458.32)	1	1	529.0	28.88249	6.028055
b128	0	Fperrara_SingleCell_Microscopy	fp_ihfa_img1.tif	(x=1624.84 y=616.25)	1	1	491.0625	27.54962	6.0199647
b129	0	Fperrara_SingleCell_Microscopy	fp_ihfa_img1.tif	(x=1631.85 y=1506.03)	1	1	287.875	20.288439	5.7595496
b130	0	Fperrara_SingleCell_Microscopy	fp_ihfa_img1.tif	(x=1645.05 y=847.11)	1	1	501.25	31.910137	5.766159
b132	0	Fperrara_SingleCell_Microscopy	fp_ihfa_img1.tif	(x=1673.78 y=1880.51)	1	1	598.5	37.137375	5.5748463
b133	0	Fperrara_SingleCell_Microscopy	fp_ihfa_img1.tif	(x=1670.76 y=1603.79)	1	1	196.875	17.82582	5.053011
b134	0	Fperrara_SingleCell_Microscopy	fp_ihfa_img1.tif	(x=1695.53 y=756.76)	1	1	365.4375	25.380949	5.725282
b135	0	Fperrara_SingleCell_Microscopy	fp_ihfa_img1.tif	(x=1718.91 y=1537.57)	1	1	658.25	36.106018	4.82971
b136	0	Fperrara_SingleCell_Microscopy	fp_ihfa_img1.tif	(x=1764.97 y=685.09)	1	1	1069.625	71.7622	5.4205337
b137	0	Fperrara_SingleCell_Microscopy	fp_ihfa_img1.tif	(x=1756.50 y=1570.74)	1	1	192.875	18.375288	4.11422
b138	0	Fperrara_SingleCell_Microscopy	fp_ihfa_img1.tif	(x=1791.07 y=1326.02)	1	1	744.0	46.26394	5.8407454
b139	0	Fperrara_SingleCell_Microscopy	fp_ihfa_img1.tif	(x=1786.36 y=165.99)	1	1	307.8125	20.787699	4.9661274
b140	0	Fperrara_SingleCell_Microscopy	fp_ihfa_img1.tif	(x=1847.72 y=1074.88)	1	1	287.5	19.32842	5.50466
b141	0	Fperrara_SingleCell_Microscopy	fp_ihfa_img1.tif	(x=1877.79 y=110.41)	1	1	1374.3516	94.93588	5.200769
b142	0	Fperrara_SingleCell_Microscopy	fp_ihfa_img1.tif	(x=1868.35 y=1553.38)	1	1	300.5	21.322842	5.4599967
b143	0	Fperrara_SingleCell_Microscopy	fp_ihfa_img1.tif	(x=1874.68 y=636.12)	1	1	192.125	15.820671	4.808822
b144	0	Fperrara_SingleCell_Microscopy	fp_ihfa_img1.tif	(x=1908.53 y=345.85)	1	1	409.84375	31.628748	5.312023
b145	0	Fperrara_SingleCell_Microscopy	fp_ihfa_img1.tif	(x=1912.93 y=242.88)	1	1	346.625	25.491884	4.547136
b146	0	Fperrara_SingleCell_Microscopy	fp_ihfa_img1.tif	(x=1931.72 y=786.68)	1	1	665.1875	45.840836	5.5911946
b147	0	Fperrara_SingleCell_Microscopy	fp_ihfa_img1.tif	(x=1953.04 y=1736.95)	1	1	1405.25	133.46825	5.004433
b148	0	Fperrara_SingleCell_Microscopy	fp_ihfa_img1.tif	(x=1951.33 y=1349.14)	1	1	246.25	17.861094	5.181657
b150	0	Fperrara_SingleCell_Microscopy	fp_ihfa_img1.tif	(x=1992.15 y=1776.50)	1	1	533.375	33.811924	5.806036
b151	0	Fperrara_SingleCell_Microscopy	fp_ihfa_img1.tif	(x=1995.11 y=1963.42)	1	1	302.375	23.26998	5.5467367
b152	0	Fperrara_SingleCell_Microscopy	fp_ihfa_img1.tif	(x=2008.01 y=1227.02)	1	1	352.875	22.630617	5.4099774
b172	0	Fperrara_SingleCell_Microscopy	fp_ihfa_img1.tif	(x=969.74 y=1454.17)	1	1	211.4375	19.741842	4.6823916
b174	0	Fperrara_SingleCell_Microscopy	fp_ihfa_img1.tif	(x=1030.64 y=1454.52)	1	1	137.125	16.376305	4.3974013
b185	0	Fperrara_SingleCell_Microscopy	fp_ihfa_img1.tif	(x=1388.31 y=2000.84)	1	1	680.0	46.91868	6.2589293
b186	0	Fperrara_SingleCell_Microscopy	fp_ihfa_img1.tif	(x=1408.79 y=2002.21)	1	1	382.75	24.982716	5.881548
b190	0	Fperrara_SingleCell_Microscopy	fp_ihfa_img1.tif	(x=1698.61 y=402.28)	1	1	295.0	26.00382	4.731929
b4	0	Fperrara_SingleCell_Microscopy	fp_ihfa_img2.tif	(x=51.94 y=139.53)	1	1	283.78662	24.535769	5.8192654
b5	0	Fperrara_SingleCell_Microscopy	fp_ihfa_img2.tif	(x=60.32 y=214.94)	1	1	568.9053	32.909313	5.0332847
b6	0	Fperrara_SingleCell_Microscopy	fp_ihfa_img2.tif	(x=66.97 y=1013.81)	1	1	206.40625	19.25716	4.856433
b8	0	Fperrara_SingleCell_Microscopy	fp_ihfa_img2.tif	(x=94.44 y=1114.85)	1	1	1073.7969	68.18189	5.1755323
b9	0	Fperrara_SingleCell_Microscopy	fp_ihfa_img2.tif	(x=95.82 y=1053.25)	1	1	518.4219	36.897667	5.0009565
b12	0	Fperrara_SingleCell_Microscopy	fp_ihfa_img2.tif	(x=125.76 y=553.14)	1	1	548.11523	30.251324	5.9125056
b14	0	Fperrara_SingleCell_Microscopy	fp_ihfa_img2.tif	(x=120.94 y=1477.22)	1	1	192.85156	16.7149	4.6588635
b18	0	Fperrara_SingleCell_Microscopy	fp_ihfa_img2.tif	(x=128.91 y=788.67)	1	1	238.98438	18.33689	5.1811476
b19	0	Fperrara_SingleCell_Microscopy	fp_ihfa_img2.tif	(x=134.22 y=356.71)	1	1	415.48242	29.956608	5.4138417
b22	0	Fperrara_SingleCell_Microscopy	fp_ihfa_img2.tif	(x=137.74 y=1768.80)	1	1	236.61719	19.884703	4.1279593
b28	0	Fperrara_SingleCell_Microscopy	fp_ihfa_img2.tif	(x=164.37 y=1888.16)	1	1	667.6875	31.32763	5.049157
b29	0	Fperrara_SingleCell_Microscopy	fp_ihfa_img2.tif	(x=168.92 y=929.44)	1	1	302.40625	20.110962	5.375714
b31	0	Fperrara_SingleCell_Microscopy	fp_ihfa_img2.tif	(x=181.03 y=1481.45)	1	1	166.67188	17.139454	4.4990916
b32	0	Fperrara_SingleCell_Microscopy	fp_ihfa_img2.tif	(x=196.35 y=985.47)	1	1	1113.75	47.31035	6.071216
b34	0	Fperrara_SingleCell_Microscopy	fp_ihfa_img2.tif	(x=193.79 y=1108.44)	1	1	382.85938	27.79143	5.279079
b36	0	Fperrara_SingleCell_Microscopy	fp_ihfa_img2.tif	(x=216.70 y=152.91)	1	1	487.1162	27.699427	6.2971673
b39	0	Fperrara_SingleCell_Microscopy	fp_ihfa_img2.tif	(x=246.48 y=432.78)	1	1	813.1367	42.771816	6.2761793
b43	0	Fperrara_SingleCell_Microscopy	fp_ihfa_img2.tif	(x=276.95 y=1059.08)	1	1	340.70312	23.4953	5.607119
b46	0	Fperrara_SingleCell_Microscopy	fp_ihfa_img2.tif	(x=322.40 y=253.12)	1	1	645.2578	37.2789	6.1441627
b48	0	Fperrara_SingleCell_Microscopy	fp_ihfa_img2.tif	(x=348.59 y=146.17)	1	1	109.42969	14.762649	4.4604664
b51	0	Fperrara_SingleCell_Microscopy	fp_ihfa_img2.tif	(x=411.76 y=1279.52)	1	1	351.40625	29.004763	5.5812926
b52	0	Fperrara_SingleCell_Microscopy	fp_ihfa_img2.tif	(x=413.99 y=459.54)	1	1	489.89062	30.077965	6.3858676
b56	0	Fperrara_SingleCell_Microscopy	fp_ihfa_img2.tif	(x=435.01 y=181.28)	1	1	406.04688	30.910826	6.0457263
b58	0	Fperrara_SingleCell_Microscopy	fp_ihfa_img2.tif	(x=434.19 y=1629.24)	1	1	452.46875	32.211132	5.0681305
b63	0	Fperrara_SingleCell_Microscopy	fp_ihfa_img2.tif	(x=507.90 y=1232.43)	1	1	279.09375	20.420998	5.5480833
b65	0	Fperrara_SingleCell_Microscopy	fp_ihfa_img2.tif	(x=515.54 y=214.31)	1	1	117.60156	12.67346	5.322187
b66	0	Fperrara_SingleCell_Microscopy	fp_ihfa_img2.tif	(x=521.98 y=502.35)	1	1	173.36719	15.192321	5.58681
b77	0	Fperrara_SingleCell_Microscopy	fp_ihfa_img2.tif	(x=578.30 y=104.32)	1	1	628.8828	30.754946	7.0305777
b78	0	Fperrara_SingleCell_Microscopy	fp_ihfa_img2.tif	(x=590.61 y=954.55)	1	1	1505.9375	54.836517	5.6492004
b79	0	Fperrara_SingleCell_Microscopy	fp_ihfa_img2.tif	(x=605.87 y=1114.32)	1	1	752.40625	36.722855	4.7308636
b84	0	Fperrara_SingleCell_Microscopy	fp_ihfa_img2.tif	(x=628.48 y=233.14)	1	1	528.1953	31.60093	4.888249
b86	0	Fperrara_SingleCell_Microscopy	fp_ihfa_img2.tif	(x=643.82 y=1547.53)	1	1	307.9375	22.366453	5.5671782
b90	0	Fperrara_SingleCell_Microscopy	fp_ihfa_img2.tif	(x=676.21 y=84.92)	1	1	410.91992	26.246307	5.8673167
b91	0	Fperrara_SingleCell_Microscopy	fp_ihfa_img2.tif	(x=688.49 y=197.28)	1	1	135.61328	15.974492	4.831814
b94	0	Fperrara_SingleCell_Microscopy	fp_ihfa_img2.tif	(x=695.38 y=931.61)	1	1	214.15625	16.075256	5.986443
b95	0	Fperrara_SingleCell_Microscopy	fp_ihfa_img2.tif	(x=699.25 y=1749.13)	1	1	318.9375	24.784805	5.4502687
b96	0	Fperrara_SingleCell_Microscopy	fp_ihfa_img2.tif	(x=701.70 y=480.21)	1	1	756.71875	43.446968	6.1004453
b98	0	Fperrara_SingleCell_Microscopy	fp_ihfa_img2.tif	(x=703.78 y=54.11)	1	1	311.48047	20.361115	6.596792
b99	0	Fperrara_SingleCell_Microscopy	fp_ihfa_img2.tif	(x=733.88 y=1504.37)	1	1	421.9375	30.251558	5.7456627
b113	0	Fperrara_SingleCell_Microscopy	fp_ihfa_img2.tif	(x=825.12 y=1014.63)	1	1	657.46875	40.644676	6.1128902
b114	0	Fperrara_SingleCell_Microscopy	fp_ihfa_img2.tif	(x=841.14 y=1954.21)	1	1	591.6875	40.424408	5.574378
b117	0	Fperrara_SingleCell_Microscopy	fp_ihfa_img2.tif	(x=850.81 y=969.55)	1	1	99.78125	11.900526	5.324351
b118	0	Fperrara_SingleCell_Microscopy	fp_ihfa_img2.tif	(x=855.80 y=688.34)	1	1	609.5	43.41356	6.2329645
b121	0	Fperrara_SingleCell_Microscopy	fp_ihfa_img2.tif	(x=877.34 y=1198.74)	1	1	615.6875	65.69097	4.109053
b122	0	Fperrara_SingleCell_Microscopy	fp_ihfa_img2.tif	(x=897.52 y=1907.16)	1	1	818.375	44.543823	5.6228395
b124	0	Fperrara_SingleCell_Microscopy	fp_ihfa_img2.tif	(x=888.27 y=445.93)	1	1	303.9375	20.869522	5.7866845
b126	0	Fperrara_SingleCell_Microscopy	fp_ihfa_img2.tif	(x=901.13 y=357.69)	1	1	1379.7656	60.972107	5.5897207
b128	0	Fperrara_SingleCell_Microscopy	fp_ihfa_img2.tif	(x=937.01 y=881.73)	1	1	166.625	18.363878	4.46914
b131	0	Fperrara_SingleCell_Microscopy	fp_ihfa_img2.tif	(x=1002.07 y=1365.29)	1	1	568.1875	31.708178	6.579438
b133	0	Fperrara_SingleCell_Microscopy	fp_ihfa_img2.tif	(x=1015.22 y=2032.33)	1	1	310.5625	20.650686	6.019684
b134	0	Fperrara_SingleCell_Microscopy	fp_ihfa_img2.tif	(x=1025.48 y=825.51)	1	1	336.65625	24.820963	6.2370915
b135	0	Fperrara_SingleCell_Microscopy	fp_ihfa_img2.tif	(x=1041.62 y=325.35)	1	1	406.98438	26.606188	6.43408
b136	0	Fperrara_SingleCell_Microscopy	fp_ihfa_img2.tif	(x=1061.31 y=649.39)	1	1	447.0	31.397327	6.0040035
b150	0	Fperrara_SingleCell_Microscopy	fp_ihfa_img2.tif	(x=1109.90 y=920.48)	1	1	554.90625	28.839376	6.7649775
b154	0	Fperrara_SingleCell_Microscopy	fp_ihfa_img2.tif	(x=1108.22 y=1502.21)	1	1	213.875	18.553652	5.8156505
b160	0	Fperrara_SingleCell_Microscopy	fp_ihfa_img2.tif	(x=1147.08 y=677.03)	1	1	873.8125	56.892654	6.226346
b161	0	Fperrara_SingleCell_Microscopy	fp_ihfa_img2.tif	(x=1136.43 y=1020.08)	1	1	682.8125	39.766	6.4184985
b162	0	Fperrara_SingleCell_Microscopy	fp_ihfa_img2.tif	(x=1152.10 y=1789.17)	1	1	608.0625	45.286366	5.585089
b167	0	Fperrara_SingleCell_Microscopy	fp_ihfa_img2.tif	(x=1166.28 y=1898.02)	1	1	522.125	30.626635	6.043353
b168	0	Fperrara_SingleCell_Microscopy	fp_ihfa_img2.tif	(x=1194.52 y=740.44)	1	1	255.15625	21.750135	5.940315
b172	0	Fperrara_SingleCell_Microscopy	fp_ihfa_img2.tif	(x=1221.17 y=752.70)	1	1	534.0625	28.770014	6.6214824
b173	0	Fperrara_SingleCell_Microscopy	fp_ihfa_img2.tif	(x=1230.27 y=526.06)	1	1	598.625	31.638699	6.084669
b174	0	Fperrara_SingleCell_Microscopy	fp_ihfa_img2.tif	(x=1253.18 y=819.77)	1	1	280.84375	23.769724	5.917648
b177	0	Fperrara_SingleCell_Microscopy	fp_ihfa_img2.tif	(x=1328.14 y=1230.53)	1	1	448.9375	28.565813	6.4292717
b178	0	Fperrara_SingleCell_Microscopy	fp_ihfa_img2.tif	(x=1361.27 y=1017.63)	1	1	810.0	61.507065	5.035296
b180	0	Fperrara_SingleCell_Microscopy	fp_ihfa_img2.tif	(x=1356.10 y=1619.22)	1	1	189.75	15.449247	5.9036574
b181	0	Fperrara_SingleCell_Microscopy	fp_ihfa_img2.tif	(x=1383.30 y=2009.87)	1	1	766.375	54.694824	6.119562
b184	0	Fperrara_SingleCell_Microscopy	fp_ihfa_img2.tif	(x=1393.10 y=1415.88)	1	1	84.4375	10.636595	4.87294
b188	0	Fperrara_SingleCell_Microscopy	fp_ihfa_img2.tif	(x=1444.65 y=1440.87)	1	1	367.9375	24.56077	6.2461042
b190	0	Fperrara_SingleCell_Microscopy	fp_ihfa_img2.tif	(x=1465.66 y=306.28)	1	1	529.5469	34.55246	6.015186
b193	0	Fperrara_SingleCell_Microscopy	fp_ihfa_img2.tif	(x=1503.66 y=876.73)	1	1	694.0	45.950706	4.9296374
b195	0	Fperrara_SingleCell_Microscopy	fp_ihfa_img2.tif	(x=1545.51 y=1363.43)	1	1	384.25	25.911587	6.2103415
b196	0	Fperrara_SingleCell_Microscopy	fp_ihfa_img2.tif	(x=1558.83 y=1139.98)	1	1	796.6875	39.58192	6.015734
b200	0	Fperrara_SingleCell_Microscopy	fp_ihfa_img2.tif	(x=1574.15 y=1465.86)	1	1	1058.625	61.50081	6.0219665
b203	0	Fperrara_SingleCell_Microscopy	fp_ihfa_img2.tif	(x=1608.04 y=1513.29)	1	1	263.25	18.71121	6.0615215
b208	0	Fperrara_SingleCell_Microscopy	fp_ihfa_img2.tif	(x=1672.16 y=1433.59)	1	1	915.25	50.990925	6.571145
b209	0	Fperrara_SingleCell_Microscopy	fp_ihfa_img2.tif	(x=1703.01 y=1846.58)	1	1	375.875	25.018864	6.3272076
b210	0	Fperrara_SingleCell_Microscopy	fp_ihfa_img2.tif	(x=1751.44 y=1314.18)	1	1	555.625	40.346565	5.9393506
b212	0	Fperrara_SingleCell_Microscopy	fp_ihfa_img2.tif	(x=1750.77 y=1500.97)	1	1	225.875	20.34155	5.506083
b213	0	Fperrara_SingleCell_Microscopy	fp_ihfa_img2.tif	(x=1759.21 y=1474.34)	1	1	382.75	23.46597	5.832212
b214	0	Fperrara_SingleCell_Microscopy	fp_ihfa_img2.tif	(x=1767.11 y=1264.08)	1	1	283.5	23.775526	5.780958
b215	0	Fperrara_SingleCell_Microscopy	fp_ihfa_img2.tif	(x=1779.20 y=605.64)	1	1	523.9375	43.81692	5.566166
b218	0	Fperrara_SingleCell_Microscopy	fp_ihfa_img2.tif	(x=1815.38 y=1076.18)	1	1	1126.625	77.89828	4.380316
b219	0	Fperrara_SingleCell_Microscopy	fp_ihfa_img2.tif	(x=1799.50 y=349.77)	1	1	334.375	21.507463	5.868659
b220	0	Fperrara_SingleCell_Microscopy	fp_ihfa_img2.tif	(x=1810.87 y=534.10)	1	1	561.4375	29.713348	5.538895
b221	0	Fperrara_SingleCell_Microscopy	fp_ihfa_img2.tif	(x=1830.54 y=829.47)	1	1	182.875	17.049936	4.7844095
b225	0	Fperrara_SingleCell_Microscopy	fp_ihfa_img2.tif	(x=1900.82 y=834.97)	1	1	478.875	30.503433	5.885082
b227	0	Fperrara_SingleCell_Microscopy	fp_ihfa_img2.tif	(x=1902.49 y=1703.75)	1	1	345.75	28.586155	4.1639943
b229	0	Fperrara_SingleCell_Microscopy	fp_ihfa_img2.tif	(x=1925.62 y=1825.57)	1	1	611.875	45.028095	5.7652364
b231	0	Fperrara_SingleCell_Microscopy	fp_ihfa_img2.tif	(x=1941.45 y=1220.38)	1	1	567.875	35.04635	6.096789
b232	0	Fperrara_SingleCell_Microscopy	fp_ihfa_img2.tif	(x=1940.68 y=155.92)	1	1	236.17188	20.835693	4.60745
b233	0	Fperrara_SingleCell_Microscopy	fp_ihfa_img2.tif	(x=1964.83 y=556.09)	1	1	345.9375	21.763887	5.347946
b234	0	Fperrara_SingleCell_Microscopy	fp_ihfa_img2.tif	(x=1990.12 y=349.59)	1	1	335.25	25.571735	5.1713843
b236	0	Fperrara_SingleCell_Microscopy	fp_ihfa_img2.tif	(x=2028.53 y=186.43)	1	1	424.64062	32.432545	5.100334
b249	0	Fperrara_SingleCell_Microscopy	fp_ihfa_img2.tif	(x=322.28 y=703.77)	1	1	242.52344	19.638893	4.052271
b250	0	Fperrara_SingleCell_Microscopy	fp_ihfa_img2.tif	(x=337.22 y=660.96)	1	1	277.5078	29.189594	4.1428494
b252	0	Fperrara_SingleCell_Microscopy	fp_ihfa_img2.tif	(x=337.54 y=714.10)	1	1	179.57812	18.829666	4.081907
b254	0	Fperrara_SingleCell_Microscopy	fp_ihfa_img2.tif	(x=339.35 y=693.57)	1	1	264.5625	31.009163	4.0651007
b256	0	Fperrara_SingleCell_Microscopy	fp_ihfa_img2.tif	(x=353.71 y=703.25)	1	1	205.91406	24.593359	4.7477384
b259	0	Fperrara_SingleCell_Microscopy	fp_ihfa_img2.tif	(x=381.06 y=696.18)	1	1	708.16406	48.120567	4.625052
b2	0	Fperrara_SingleCell_Microscopy	fp_ihfa_img3.tif	(x=15.12 y=1806.19)	1	1	279.43213	20.272943	4.906077
b3	0	Fperrara_SingleCell_Microscopy	fp_ihfa_img3.tif	(x=27.92 y=598.90)	1	1	417.07422	27.852396	5.751232
b6	0	Fperrara_SingleCell_Microscopy	fp_ihfa_img3.tif	(x=34.06 y=978.32)	1	1	339.8086	38.122128	4.0470624
b8	0	Fperrara_SingleCell_Microscopy	fp_ihfa_img3.tif	(x=63.85 y=2010.53)	1	1	707.6836	33.36896	4.867133
b13	0	Fperrara_SingleCell_Microscopy	fp_ihfa_img3.tif	(x=124.88 y=1337.02)	1	1	196.90625	16.89222	5.075882
b15	0	Fperrara_SingleCell_Microscopy	fp_ihfa_img3.tif	(x=134.86 y=575.58)	1	1	256.47266	22.666893	5.5758724
b16	0	Fperrara_SingleCell_Microscopy	fp_ihfa_img3.tif	(x=151.28 y=1247.14)	1	1	1074.4922	70.39711	5.3566275
b17	0	Fperrara_SingleCell_Microscopy	fp_ihfa_img3.tif	(x=147.18 y=493.18)	1	1	401.51953	30.301062	5.8180056
b20	0	Fperrara_SingleCell_Microscopy	fp_ihfa_img3.tif	(x=172.18 y=1881.86)	1	1	467.0625	34.490112	4.9912925
b21	0	Fperrara_SingleCell_Microscopy	fp_ihfa_img3.tif	(x=178.98 y=178.44)	1	1	725.36523	44.771652	5.4837737
b22	0	Fperrara_SingleCell_Microscopy	fp_ihfa_img3.tif	(x=179.80 y=783.18)	1	1	898.2383	62.574436	5.403162
b25	0	Fperrara_SingleCell_Microscopy	fp_ihfa_img3.tif	(x=201.38 y=61.22)	1	1	387.7456	23.775017	5.356035
b26	0	Fperrara_SingleCell_Microscopy	fp_ihfa_img3.tif	(x=228.02 y=1103.49)	1	1	858.875	58.052498	5.310141
b27	0	Fperrara_SingleCell_Microscopy	fp_ihfa_img3.tif	(x=231.91 y=92.17)	1	1	207.34668	17.649693	4.7853
b29	0	Fperrara_SingleCell_Microscopy	fp_ihfa_img3.tif	(x=253.10 y=876.52)	1	1	330.71094	21.86533	5.673375
b30	0	Fperrara_SingleCell_Microscopy	fp_ihfa_img3.tif	(x=265.47 y=1226.74)	1	1	383.0625	24.909307	5.1005263
b31	0	Fperrara_SingleCell_Microscopy	fp_ihfa_img3.tif	(x=310.42 y=662.25)	1	1	1295.7969	94.94867	5.817322
b37	0	Fperrara_SingleCell_Microscopy	fp_ihfa_img3.tif	(x=309.58 y=73.12)	1	1	787.7969	51.49965	5.9353523
b38	0	Fperrara_SingleCell_Microscopy	fp_ihfa_img3.tif	(x=319.79 y=1444.42)	1	1	410.01562	23.792778	5.7432847
b42	0	Fperrara_SingleCell_Microscopy	fp_ihfa_img3.tif	(x=432.56 y=222.69)	1	1	2689.7656	179.34361	5.6501837
b43	0	Fperrara_SingleCell_Microscopy	fp_ihfa_img3.tif	(x=389.31 y=1217.83)	1	1	229.54688	17.55229	5.482012
b44	0	Fperrara_SingleCell_Microscopy	fp_ihfa_img3.tif	(x=394.46 y=828.15)	1	1	375.42188	24.410461	6.018701
b45	0	Fperrara_SingleCell_Microscopy	fp_ihfa_img3.tif	(x=401.19 y=569.65)	1	1	274.14062	22.265762	5.705866
b47	0	Fperrara_SingleCell_Microscopy	fp_ihfa_img3.tif	(x=433.94 y=424.44)	1	1	285.02344	21.453667	5.8880725
b48	0	Fperrara_SingleCell_Microscopy	fp_ihfa_img3.tif	(x=455.38 y=1705.83)	1	1	317.5625	24.322489	5.0661287
b50	0	Fperrara_SingleCell_Microscopy	fp_ihfa_img3.tif	(x=501.03 y=439.63)	1	1	500.73438	28.18412	5.970154
b51	0	Fperrara_SingleCell_Microscopy	fp_ihfa_img3.tif	(x=501.65 y=1764.90)	1	1	439.0625	26.90307	5.792093
b52	0	Fperrara_SingleCell_Microscopy	fp_ihfa_img3.tif	(x=512.48 y=980.15)	1	1	1122.7969	75.434135	5.772946
b53	0	Fperrara_SingleCell_Microscopy	fp_ihfa_img3.tif	(x=527.10 y=850.70)	1	1	1450.9531	87.39106	5.6405096
b54	0	Fperrara_SingleCell_Microscopy	fp_ihfa_img3.tif	(x=533.38 y=682.81)	1	1	288.14062	22.291904	5.6599
b55	0	Fperrara_SingleCell_Microscopy	fp_ihfa_img3.tif	(x=546.09 y=2009.48)	1	1	539.4375	31.160467	4.8449993
b57	0	Fperrara_SingleCell_Microscopy	fp_ihfa_img3.tif	(x=578.53 y=1881.01)	1	1	595.6875	39.393875	5.54232
b58	0	Fperrara_SingleCell_Microscopy	fp_ihfa_img3.tif	(x=589.38 y=1762.27)	1	1	263.625	21.210924	5.1398807
b59	0	Fperrara_SingleCell_Microscopy	fp_ihfa_img3.tif	(x=597.08 y=1615.12)	1	1	507.65625	34.44004	4.6330066
b60	0	Fperrara_SingleCell_Microscopy	fp_ihfa_img3.tif	(x=597.61 y=1567.73)	1	1	653.9375	47.710186	4.544262
b63	0	Fperrara_SingleCell_Microscopy	fp_ihfa_img3.tif	(x=602.51 y=1819.36)	1	1	513.625	26.067675	4.49963
b66	0	Fperrara_SingleCell_Microscopy	fp_ihfa_img3.tif	(x=630.10 y=952.01)	1	1	449.96875	33.331673	5.1291304
b67	0	Fperrara_SingleCell_Microscopy	fp_ihfa_img3.tif	(x=638.74 y=1535.65)	1	1	252.59375	19.593658	5.434913
b68	0	Fperrara_SingleCell_Microscopy	fp_ihfa_img3.tif	(x=638.62 y=1721.86)	1	1	613.9375	42.466885	5.5121584
b69	0	Fperrara_SingleCell_Microscopy	fp_ihfa_img3.tif	(x=658.96 y=800.75)	1	1	420.46875	35.13396	5.603391
b70	0	Fperrara_SingleCell_Microscopy	fp_ihfa_img3.tif	(x=656.15 y=770.66)	1	1	161.03125	16.816463	4.910155
b71	0	Fperrara_SingleCell_Microscopy	fp_ihfa_img3.tif	(x=681.67 y=78.06)	1	1	461.91602	29.923378	5.403786
b73	0	Fperrara_SingleCell_Microscopy	fp_ihfa_img3.tif	(x=686.67 y=1278.12)	1	1	371.875	24.650278	5.8736734
b74	0	Fperrara_SingleCell_Microscopy	fp_ihfa_img3.tif	(x=699.38 y=2020.05)	1	1	254.5625	18.515953	5.6071105
b75	0	Fperrara_SingleCell_Microscopy	fp_ihfa_img3.tif	(x=723.19 y=1890.74)	1	1	743.75	45.888847	5.4991007
b76	0	Fperrara_SingleCell_Microscopy	fp_ihfa_img3.tif	(x=740.92 y=1635.97)	1	1	379.0	28.017944	5.6547375
b77	0	Fperrara_SingleCell_Microscopy	fp_ihfa_img3.tif	(x=753.03 y=295.66)	1	1	104.171875	11.974967	4.6534586
b78	0	Fperrara_SingleCell_Microscopy	fp_ihfa_img3.tif	(x=775.57 y=1240.52)	1	1	405.375	25.774216	5.692894
b79	0	Fperrara_SingleCell_Microscopy	fp_ihfa_img3.tif	(x=806.14 y=1397.40)	1	1	1251.4375	73.499405	5.617718
b80	0	Fperrara_SingleCell_Microscopy	fp_ihfa_img3.tif	(x=806.66 y=491.51)	1	1	574.1406	65.15041	4.1409116
b81	0	Fperrara_SingleCell_Microscopy	fp_ihfa_img3.tif	(x=802.72 y=58.79)	1	1	392.74414	26.955378	5.9149065
b82	0	Fperrara_SingleCell_Microscopy	fp_ihfa_img3.tif	(x=813.25 y=410.95)	1	1	486.20312	27.261621	5.8286486
b83	0	Fperrara_SingleCell_Microscopy	fp_ihfa_img3.tif	(x=821.21 y=1928.21)	1	1	247.625	18.921782	5.3756046
b84	0	Fperrara_SingleCell_Microscopy	fp_ihfa_img3.tif	(x=835.37 y=1982.89)	1	1	393.8125	30.650625	5.5636497
b85	0	Fperrara_SingleCell_Microscopy	fp_ihfa_img3.tif	(x=831.76 y=638.04)	1	1	406.78125	30.172756	5.529111
b88	0	Fperrara_SingleCell_Microscopy	fp_ihfa_img3.tif	(x=857.24 y=78.85)	1	1	252.58008	21.330992	5.255056
b89	0	Fperrara_SingleCell_Microscopy	fp_ihfa_img3.tif	(x=881.92 y=1897.98)	1	1	1318.5	76.90076	5.323814
b90	0	Fperrara_SingleCell_Microscopy	fp_ihfa_img3.tif	(x=859.50 y=1345.06)	1	1	294.75	21.092424	5.2133994
b91	0	Fperrara_SingleCell_Microscopy	fp_ihfa_img3.tif	(x=863.24 y=105.65)	1	1	309.1836	22.111511	5.107274
b93	0	Fperrara_SingleCell_Microscopy	fp_ihfa_img3.tif	(x=876.23 y=2007.22)	1	1	244.3125	18.24137	5.3749504
b94	0	Fperrara_SingleCell_Microscopy	fp_ihfa_img3.tif	(x=880.92 y=271.34)	1	1	508.25	30.046783	6.16878
b95	0	Fperrara_SingleCell_Microscopy	fp_ihfa_img3.tif	(x=897.11 y=1365.67)	1	1	374.5	28.167612	5.7263217
b96	0	Fperrara_SingleCell_Microscopy	fp_ihfa_img3.tif	(x=928.92 y=1844.77)	1	1	640.0	37.867477	5.7348986
b97	0	Fperrara_SingleCell_Microscopy	fp_ihfa_img3.tif	(x=928.69 y=1284.03)	1	1	209.4375	17.981152	5.55169
b98	0	Fperrara_SingleCell_Microscopy	fp_ihfa_img3.tif	(x=942.00 y=617.78)	1	1	388.65625	23.407381	6.1631045
b99	0	Fperrara_SingleCell_Microscopy	fp_ihfa_img3.tif	(x=942.38 y=1790.44)	1	1	286.8125	22.506712	4.8590946
b103	0	Fperrara_SingleCell_Microscopy	fp_ihfa_img3.tif	(x=985.59 y=1055.61)	1	1	284.40625	20.920877	5.6830397
b104	0	Fperrara_SingleCell_Microscopy	fp_ihfa_img3.tif	(x=992.17 y=917.28)	1	1	393.78125	26.724964	5.6571336
b105	0	Fperrara_SingleCell_Microscopy	fp_ihfa_img3.tif	(x=1012.94 y=902.35)	1	1	496.71875	34.747063	5.3603363
b106	0	Fperrara_SingleCell_Microscopy	fp_ihfa_img3.tif	(x=1031.22 y=486.36)	1	1	197.89062	17.067986	5.365466
b107	0	Fperrara_SingleCell_Microscopy	fp_ihfa_img3.tif	(x=1048.34 y=1534.74)	1	1	275.625	22.400766	5.698461
b108	0	Fperrara_SingleCell_Microscopy	fp_ihfa_img3.tif	(x=1054.81 y=1117.98)	1	1	544.625	31.677456	6.068208
b109	0	Fperrara_SingleCell_Microscopy	fp_ihfa_img3.tif	(x=1073.57 y=1827.41)	1	1	232.4375	20.837164	5.400483
b111	0	Fperrara_SingleCell_Microscopy	fp_ihfa_img3.tif	(x=1081.65 y=724.36)	1	1	458.5625	24.433886	5.824894
b112	0	Fperrara_SingleCell_Microscopy	fp_ihfa_img3.tif	(x=1214.60 y=843.90)	1	1	498.3125	39.56329	4.88511
b114	0	Fperrara_SingleCell_Microscopy	fp_ihfa_img3.tif	(x=1238.64 y=1119.92)	1	1	368.625	32.523144	5.186998
b115	0	Fperrara_SingleCell_Microscopy	fp_ihfa_img3.tif	(x=1237.87 y=90.03)	1	1	225.35938	17.987974	4.8332314
b116	0	Fperrara_SingleCell_Microscopy	fp_ihfa_img3.tif	(x=1250.80 y=1298.45)	1	1	335.3125	23.929466	5.7933707
b117	0	Fperrara_SingleCell_Microscopy	fp_ihfa_img3.tif	(x=1256.87 y=1417.55)	1	1	447.125	32.15845	5.564373
b118	0	Fperrara_SingleCell_Microscopy	fp_ihfa_img3.tif	(x=1252.33 y=1699.42)	1	1	345.625	23.676867	5.56053
b119	0	Fperrara_SingleCell_Microscopy	fp_ihfa_img3.tif	(x=1343.47 y=253.45)	1	1	720.4219	41.972668	5.7723064
b120	0	Fperrara_SingleCell_Microscopy	fp_ihfa_img3.tif	(x=1403.19 y=726.00)	1	1	455.0625	32.796547	5.309014
b121	0	Fperrara_SingleCell_Microscopy	fp_ihfa_img3.tif	(x=1405.07 y=1999.25)	1	1	498.75	27.72348	5.9767365
b122	0	Fperrara_SingleCell_Microscopy	fp_ihfa_img3.tif	(x=1434.57 y=1360.86)	1	1	304.5625	21.396523	5.783772
b124	0	Fperrara_SingleCell_Microscopy	fp_ihfa_img3.tif	(x=1465.17 y=1349.39)	1	1	229.8125	18.126398	5.504662
b125	0	Fperrara_SingleCell_Microscopy	fp_ihfa_img3.tif	(x=1468.86 y=1026.27)	1	1	211.625	17.236282	5.11494
b127	0	Fperrara_SingleCell_Microscopy	fp_ihfa_img3.tif	(x=1495.22 y=1884.38)	1	1	771.75	57.697895	5.346703
b128	0	Fperrara_SingleCell_Microscopy	fp_ihfa_img3.tif	(x=1483.57 y=1557.25)	1	1	149.375	16.808666	4.3691473
b129	0	Fperrara_SingleCell_Microscopy	fp_ihfa_img3.tif	(x=1492.76 y=715.12)	1	1	429.1875	27.179382	5.504761
b130	0	Fperrara_SingleCell_Microscopy	fp_ihfa_img3.tif	(x=1512.78 y=531.60)	1	1	785.25	53.2988	5.388384
b131	0	Fperrara_SingleCell_Microscopy	fp_ihfa_img3.tif	(x=1529.11 y=1802.16)	1	1	1218.625	68.037056	5.7386384
b132	0	Fperrara_SingleCell_Microscopy	fp_ihfa_img3.tif	(x=1526.24 y=1581.80)	1	1	415.125	31.801893	5.1558948
b133	0	Fperrara_SingleCell_Microscopy	fp_ihfa_img3.tif	(x=1552.71 y=1063.28)	1	1	294.0	19.585915	5.135408
b134	0	Fperrara_SingleCell_Microscopy	fp_ihfa_img3.tif	(x=1561.44 y=2000.51)	1	1	658.125	35.706047	4.9503837
b135	0	Fperrara_SingleCell_Microscopy	fp_ihfa_img3.tif	(x=1561.25 y=407.25)	1	1	384.5	28.450699	4.5597243
b136	0	Fperrara_SingleCell_Microscopy	fp_ihfa_img3.tif	(x=1599.86 y=1728.28)	1	1	1422.25	68.736855	4.2121067
b138	0	Fperrara_SingleCell_Microscopy	fp_ihfa_img3.tif	(x=1595.43 y=1006.47)	1	1	443.5625	26.687233	5.3720155
b143	0	Fperrara_SingleCell_Microscopy	fp_ihfa_img3.tif	(x=1608.04 y=1321.13)	1	1	237.375	17.753685	4.873704
b145	0	Fperrara_SingleCell_Microscopy	fp_ihfa_img3.tif	(x=1667.94 y=1407.04)	1	1	488.375	40.033813	4.614628
b147	0	Fperrara_SingleCell_Microscopy	fp_ihfa_img3.tif	(x=1686.27 y=1004.29)	1	1	242.1875	19.132578	4.629804
b148	0	Fperrara_SingleCell_Microscopy	fp_ihfa_img3.tif	(x=1715.30 y=328.26)	1	1	296.71875	20.361237	4.7429953
b149	0	Fperrara_SingleCell_Microscopy	fp_ihfa_img3.tif	(x=1727.18 y=664.82)	1	1	292.5625	27.639975	4.2193604
b151	0	Fperrara_SingleCell_Microscopy	fp_ihfa_img3.tif	(x=1748.15 y=822.35)	1	1	793.0	34.698154	5.563041
b152	0	Fperrara_SingleCell_Microscopy	fp_ihfa_img3.tif	(x=1742.60 y=785.63)	1	1	328.4375	25.731554	4.9913406
b154	0	Fperrara_SingleCell_Microscopy	fp_ihfa_img3.tif	(x=1796.54 y=1419.37)	1	1	500.125	29.89897	5.6541543
b155	0	Fperrara_SingleCell_Microscopy	fp_ihfa_img3.tif	(x=1821.34 y=1539.80)	1	1	336.25	25.057894	4.249527
b156	0	Fperrara_SingleCell_Microscopy	fp_ihfa_img3.tif	(x=1836.09 y=446.76)	1	1	531.90625	35.22481	4.16742
b157	0	Fperrara_SingleCell_Microscopy	fp_ihfa_img3.tif	(x=1846.24 y=659.29)	1	1	248.0	19.457705	4.315409
b160	0	Fperrara_SingleCell_Microscopy	fp_ihfa_img3.tif	(x=1876.40 y=1686.43)	1	1	366.75	22.813332	5.059388
b161	0	Fperrara_SingleCell_Microscopy	fp_ihfa_img3.tif	(x=1878.05 y=179.12)	1	1	358.0	23.199615	4.89752
b162	0	Fperrara_SingleCell_Microscopy	fp_ihfa_img3.tif	(x=1931.17 y=662.33)	1	1	1076.6875	67.716255	5.311231
b163	0	Fperrara_SingleCell_Microscopy	fp_ihfa_img3.tif	(x=1975.66 y=1361.98)	1	1	1650.875	106.052246	5.0935125
b164	0	Fperrara_SingleCell_Microscopy	fp_ihfa_img3.tif	(x=1966.45 y=1925.37)	1	1	362.375	28.84298	5.0566216
b175	0	Fperrara_SingleCell_Microscopy	fp_ihfa_img3.tif	(x=329.04 y=1920.72)	1	1	157.59375	13.959076	4.179248
b176	0	Fperrara_SingleCell_Microscopy	fp_ihfa_img3.tif	(x=346.60 y=1927.21)	1	1	894.84375	57.67891	5.0056252
b178	0	Fperrara_SingleCell_Microscopy	fp_ihfa_img3.tif	(x=734.24 y=617.47)	1	1	384.8125	29.845087	5.00082
b187	0	Fperrara_SingleCell_Microscopy	fp_ihfa_img3.tif	(x=1222.45 y=1050.43)	1	1	306.5	25.793518	4.119918
b188	0	Fperrara_SingleCell_Microscopy	fp_ihfa_img3.tif	(x=1226.61 y=1066.15)	1	1	147.5	15.891786	4.044505
b3	0	Fperrara_SingleCell_Microscopy	fp_ihfa_img4.tif	(x=47.93 y=838.05)	1	1	517.8535	35.482624	6.0030417
b4	0	Fperrara_SingleCell_Microscopy	fp_ihfa_img4.tif	(x=38.52 y=1561.15)	1	1	120.234375	12.722184	4.5636063
b5	0	Fperrara_SingleCell_Microscopy	fp_ihfa_img4.tif	(x=58.44 y=286.24)	1	1	253.30762	18.759174	5.1850996
b6	0	Fperrara_SingleCell_Microscopy	fp_ihfa_img4.tif	(x=61.69 y=1659.84)	1	1	372.7422	24.066296	5.02688
b8	0	Fperrara_SingleCell_Microscopy	fp_ihfa_img4.tif	(x=68.58 y=945.82)	1	1	1095.3105	48.174522	5.4297795
b9	0	Fperrara_SingleCell_Microscopy	fp_ihfa_img4.tif	(x=86.01 y=1530.29)	1	1	166.35938	16.999865	4.0007977
b10	0	Fperrara_SingleCell_Microscopy	fp_ihfa_img4.tif	(x=88.49 y=282.74)	1	1	231.05566	19.388369	5.4621844
b11	0	Fperrara_SingleCell_Microscopy	fp_ihfa_img4.tif	(x=102.87 y=188.26)	1	1	702.18994	34.121124	6.018166
b13	0	Fperrara_SingleCell_Microscopy	fp_ihfa_img4.tif	(x=111.22 y=1081.79)	1	1	414.58984	26.59925	5.540215
b14	0	Fperrara_SingleCell_Microscopy	fp_ihfa_img4.tif	(x=127.09 y=1992.62)	1	1	289.9453	21.107712	4.87473
b15	0	Fperrara_SingleCell_Microscopy	fp_ihfa_img4.tif	(x=128.53 y=929.64)	1	1	114.26953	13.30841	4.260845
b16	0	Fperrara_SingleCell_Microscopy	fp_ihfa_img4.tif	(x=141.10 y=1098.74)	1	1	231.19531	21.696266	5.291654
b17	0	Fperrara_SingleCell_Microscopy	fp_ihfa_img4.tif	(x=155.21 y=741.05)	1	1	382.1875	28.834303	5.7233152
b18	0	Fperrara_SingleCell_Microscopy	fp_ihfa_img4.tif	(x=156.46 y=134.11)	1	1	402.0918	30.759977	6.0622034
b19	0	Fperrara_SingleCell_Microscopy	fp_ihfa_img4.tif	(x=162.67 y=478.03)	1	1	718.3906	41.76933	5.985785
b20	0	Fperrara_SingleCell_Microscopy	fp_ihfa_img4.tif	(x=178.30 y=1338.71)	1	1	244.72656	20.535954	4.8475046
b23	0	Fperrara_SingleCell_Microscopy	fp_ihfa_img4.tif	(x=210.72 y=610.31)	1	1	634.8828	41.49018	4.990196
b24	0	Fperrara_SingleCell_Microscopy	fp_ihfa_img4.tif	(x=204.87 y=2010.09)	1	1	1218.6719	65.465225	5.058812
b25	0	Fperrara_SingleCell_Microscopy	fp_ihfa_img4.tif	(x=226.82 y=1741.60)	1	1	527.1719	36.07973	5.116556
b26	0	Fperrara_SingleCell_Microscopy	fp_ihfa_img4.tif	(x=236.72 y=251.65)	1	1	345.80078	25.282673	5.942211
b27	0	Fperrara_SingleCell_Microscopy	fp_ihfa_img4.tif	(x=258.87 y=616.09)	1	1	703.8047	47.208405	5.6324763
b28	0	Fperrara_SingleCell_Microscopy	fp_ihfa_img4.tif	(x=262.72 y=298.81)	1	1	350.8047	26.89217	5.086186
b30	0	Fperrara_SingleCell_Microscopy	fp_ihfa_img4.tif	(x=283.58 y=1672.57)	1	1	1089.7812	59.463802	5.1456194
b34	0	Fperrara_SingleCell_Microscopy	fp_ihfa_img4.tif	(x=285.36 y=1127.71)	1	1	316.78125	26.79183	5.6071053
b36	0	Fperrara_SingleCell_Microscopy	fp_ihfa_img4.tif	(x=281.91 y=1883.50)	1	1	405.78125	30.938646	5.349309
b38	0	Fperrara_SingleCell_Microscopy	fp_ihfa_img4.tif	(x=287.23 y=587.42)	1	1	408.14844	24.14101	5.658869
b44	0	Fperrara_SingleCell_Microscopy	fp_ihfa_img4.tif	(x=311.19 y=1585.07)	1	1	422.5625	27.036522	5.205391
b46	0	Fperrara_SingleCell_Microscopy	fp_ihfa_img4.tif	(x=332.39 y=1857.33)	1	1	274.6875	20.728746	4.159944
b47	0	Fperrara_SingleCell_Microscopy	fp_ihfa_img4.tif	(x=342.17 y=1777.66)	1	1	126.59375	14.373955	4.56575
b49	0	Fperrara_SingleCell_Microscopy	fp_ihfa_img4.tif	(x=360.24 y=1138.63)	1	1	749.46875	31.260174	5.4350114
b50	0	Fperrara_SingleCell_Microscopy	fp_ihfa_img4.tif	(x=420.63 y=954.31)	1	1	1003.6406	73.43953	4.737609
b52	0	Fperrara_SingleCell_Microscopy	fp_ihfa_img4.tif	(x=431.23 y=1281.44)	1	1	386.25	26.056414	5.833765
b53	0	Fperrara_SingleCell_Microscopy	fp_ihfa_img4.tif	(x=447.93 y=503.14)	1	1	403.4922	29.465433	5.8036394
b54	0	Fperrara_SingleCell_Microscopy	fp_ihfa_img4.tif	(x=458.37 y=1618.24)	1	1	307.6875	24.050636	5.5597463
b55	0	Fperrara_SingleCell_Microscopy	fp_ihfa_img4.tif	(x=473.13 y=1791.20)	1	1	534.34375	42.093098	5.2529807
b56	0	Fperrara_SingleCell_Microscopy	fp_ihfa_img4.tif	(x=484.55 y=85.72)	1	1	455.04492	28.74577	4.840473
b57	0	Fperrara_SingleCell_Microscopy	fp_ihfa_img4.tif	(x=495.63 y=1499.20)	1	1	336.1875	24.456488	5.7107296
b59	0	Fperrara_SingleCell_Microscopy	fp_ihfa_img4.tif	(x=517.82 y=448.32)	1	1	686.7656	31.578972	5.997894
b60	0	Fperrara_SingleCell_Microscopy	fp_ihfa_img4.tif	(x=537.04 y=1815.14)	1	1	733.9375	33.426006	5.442328
b61	0	Fperrara_SingleCell_Microscopy	fp_ihfa_img4.tif	(x=576.79 y=1668.23)	1	1	646.46875	40.54239	5.48576
b66	0	Fperrara_SingleCell_Microscopy	fp_ihfa_img4.tif	(x=624.52 y=363.88)	1	1	554.6406	34.280926	5.355088
b67	0	Fperrara_SingleCell_Microscopy	fp_ihfa_img4.tif	(x=618.18 y=1038.20)	1	1	118.21875	12.518555	5.3822026
b68	0	Fperrara_SingleCell_Microscopy	fp_ihfa_img4.tif	(x=672.55 y=1111.82)	1	1	213.78125	17.958357	5.5403733
b69	0	Fperrara_SingleCell_Microscopy	fp_ihfa_img4.tif	(x=689.75 y=70.25)	1	1	913.042	56.540035	5.9767256
b70	0	Fperrara_SingleCell_Microscopy	fp_ihfa_img4.tif	(x=719.87 y=147.39)	1	1	505.4375	27.317886	6.1708336
b72	0	Fperrara_SingleCell_Microscopy	fp_ihfa_img4.tif	(x=737.94 y=197.43)	1	1	890.5156	47.43691	4.537004
b75	0	Fperrara_SingleCell_Microscopy	fp_ihfa_img4.tif	(x=774.55 y=566.79)	1	1	439.64062	25.12113	4.909832
b79	0	Fperrara_SingleCell_Microscopy	fp_ihfa_img4.tif	(x=789.97 y=1245.31)	1	1	1098.1562	55.271076	5.301458
b80	0	Fperrara_SingleCell_Microscopy	fp_ihfa_img4.tif	(x=787.58 y=286.34)	1	1	274.58594	23.324993	5.4983
b81	0	Fperrara_SingleCell_Microscopy	fp_ihfa_img4.tif	(x=824.96 y=1579.94)	1	1	723.5625	42.24893	5.5996637
b82	0	Fperrara_SingleCell_Microscopy	fp_ihfa_img4.tif	(x=823.86 y=1685.03)	1	1	329.1875	24.217415	4.743928
b83	0	Fperrara_SingleCell_Microscopy	fp_ihfa_img4.tif	(x=833.48 y=1441.35)	1	1	745.125	51.065006	5.500018
b84	0	Fperrara_SingleCell_Microscopy	fp_ihfa_img4.tif	(x=832.76 y=920.25)	1	1	411.71875	23.447386	6.0796247
b85	0	Fperrara_SingleCell_Microscopy	fp_ihfa_img4.tif	(x=836.00 y=1380.92)	1	1	565.8125	43.344875	4.8442736
b86	0	Fperrara_SingleCell_Microscopy	fp_ihfa_img4.tif	(x=849.53 y=221.03)	1	1	865.375	51.81926	5.699476
b88	0	Fperrara_SingleCell_Microscopy	fp_ihfa_img4.tif	(x=856.15 y=782.87)	1	1	670.0625	57.028206	5.657067
b89	0	Fperrara_SingleCell_Microscopy	fp_ihfa_img4.tif	(x=876.84 y=1323.56)	1	1	906.4375	62.3135	5.4960685
b90	0	Fperrara_SingleCell_Microscopy	fp_ihfa_img4.tif	(x=889.93 y=2024.18)	1	1	422.625	25.593813	5.6795554
b91	0	Fperrara_SingleCell_Microscopy	fp_ihfa_img4.tif	(x=892.89 y=699.10)	1	1	253.71875	20.075497	5.7593193
b92	0	Fperrara_SingleCell_Microscopy	fp_ihfa_img4.tif	(x=896.72 y=504.61)	1	1	437.96875	34.34011	5.5839033
b93	0	Fperrara_SingleCell_Microscopy	fp_ihfa_img4.tif	(x=910.16 y=1290.17)	1	1	820.0625	45.93074	5.6176896
b95	0	Fperrara_SingleCell_Microscopy	fp_ihfa_img4.tif	(x=931.27 y=308.23)	1	1	754.1406	38.624805	6.042549
b96	0	Fperrara_SingleCell_Microscopy	fp_ihfa_img4.tif	(x=943.38 y=1624.96)	1	1	373.25	27.445642	5.7126794
b97	0	Fperrara_SingleCell_Microscopy	fp_ihfa_img4.tif	(x=950.23 y=1189.57)	1	1	713.625	36.19627	5.9760556
b98	0	Fperrara_SingleCell_Microscopy	fp_ihfa_img4.tif	(x=953.22 y=517.02)	1	1	220.53125	17.829628	4.4440956
b99	0	Fperrara_SingleCell_Microscopy	fp_ihfa_img4.tif	(x=981.36 y=769.15)	1	1	1244.5	66.58926	5.5900283
b100	0	Fperrara_SingleCell_Microscopy	fp_ihfa_img4.tif	(x=964.10 y=1851.14)	1	1	487.75	27.95078	5.997222
b103	0	Fperrara_SingleCell_Microscopy	fp_ihfa_img4.tif	(x=992.42 y=980.15)	1	1	452.0625	28.935257	5.938224
b104	0	Fperrara_SingleCell_Microscopy	fp_ihfa_img4.tif	(x=995.05 y=557.63)	1	1	808.9375	38.09124	5.5107183
b105	0	Fperrara_SingleCell_Microscopy	fp_ihfa_img4.tif	(x=1022.69 y=575.02)	1	1	457.0	35.562225	5.3424134
b106	0	Fperrara_SingleCell_Microscopy	fp_ihfa_img4.tif	(x=1107.73 y=1487.95)	1	1	1228.3125	73.857864	4.943431
b107	0	Fperrara_SingleCell_Microscopy	fp_ihfa_img4.tif	(x=1101.76 y=1054.39)	1	1	484.6875	32.831047	5.6745925
b108	0	Fperrara_SingleCell_Microscopy	fp_ihfa_img4.tif	(x=1125.31 y=524.40)	1	1	513.5625	34.34968	6.0698066
b109	0	Fperrara_SingleCell_Microscopy	fp_ihfa_img4.tif	(x=1206.00 y=357.94)	1	1	229.57812	19.951778	5.087908
b112	0	Fperrara_SingleCell_Microscopy	fp_ihfa_img4.tif	(x=1246.10 y=724.84)	1	1	367.53125	25.625257	5.6210446
b113	0	Fperrara_SingleCell_Microscopy	fp_ihfa_img4.tif	(x=1283.13 y=950.27)	1	1	153.9375	16.043	4.6317744
b114	0	Fperrara_SingleCell_Microscopy	fp_ihfa_img4.tif	(x=1300.58 y=1168.38)	1	1	264.625	20.29813	5.4300547
b115	0	Fperrara_SingleCell_Microscopy	fp_ihfa_img4.tif	(x=1327.08 y=1858.72)	1	1	1123.5	55.425816	5.6954656
b116	0	Fperrara_SingleCell_Microscopy	fp_ihfa_img4.tif	(x=1340.33 y=1271.18)	1	1	360.6875	25.104017	5.5739913
b117	0	Fperrara_SingleCell_Microscopy	fp_ihfa_img4.tif	(x=1383.71 y=1402.56)	1	1	895.0625	58.09925	5.7273936
b118	0	Fperrara_SingleCell_Microscopy	fp_ihfa_img4.tif	(x=1378.31 y=545.98)	1	1	404.5	30.11167	4.72745
b119	0	Fperrara_SingleCell_Microscopy	fp_ihfa_img4.tif	(x=1401.97 y=1740.05)	1	1	266.625	18.837141	5.635524
b125	0	Fperrara_SingleCell_Microscopy	fp_ihfa_img4.tif	(x=1433.03 y=1944.62)	1	1	420.625	26.570087	5.745864
b126	0	Fperrara_SingleCell_Microscopy	fp_ihfa_img4.tif	(x=1442.95 y=46.23)	1	1	371.7422	23.928679	5.141498
b127	0	Fperrara_SingleCell_Microscopy	fp_ihfa_img4.tif	(x=1465.96 y=1830.53)	1	1	432.125	28.374046	5.46241
b128	0	Fperrara_SingleCell_Microscopy	fp_ihfa_img4.tif	(x=1473.32 y=1474.77)	1	1	278.75	21.062626	4.5351315
b129	0	Fperrara_SingleCell_Microscopy	fp_ihfa_img4.tif	(x=1495.10 y=777.99)	1	1	500.125	28.755976	5.9596696
b130	0	Fperrara_SingleCell_Microscopy	fp_ihfa_img4.tif	(x=1499.63 y=391.40)	1	1	283.3125	23.686197	4.841087
b131	0	Fperrara_SingleCell_Microscopy	fp_ihfa_img4.tif	(x=1505.90 y=1378.01)	1	1	559.0625	32.35822	5.7211604
b132	0	Fperrara_SingleCell_Microscopy	fp_ihfa_img4.tif	(x=1528.73 y=85.28)	1	1	330.98047	23.51076	4.4147263
b133	0	Fperrara_SingleCell_Microscopy	fp_ihfa_img4.tif	(x=1548.99 y=467.42)	1	1	683.84375	35.440987	4.058172
b134	0	Fperrara_SingleCell_Microscopy	fp_ihfa_img4.tif	(x=1637.71 y=1520.17)	1	1	487.125	29.265314	5.894482
b135	0	Fperrara_SingleCell_Microscopy	fp_ihfa_img4.tif	(x=1644.41 y=169.77)	1	1	499.59375	34.755455	5.4938817
b136	0	Fperrara_SingleCell_Microscopy	fp_ihfa_img4.tif	(x=1681.35 y=1671.19)	1	1	1074.375	65.82956	5.1175647
b137	0	Fperrara_SingleCell_Microscopy	fp_ihfa_img4.tif	(x=1683.05 y=580.52)	1	1	284.03125	22.518648	4.790222
b138	0	Fperrara_SingleCell_Microscopy	fp_ihfa_img4.tif	(x=1694.50 y=131.46)	1	1	396.58594	23.619518	5.211006
b139	0	Fperrara_SingleCell_Microscopy	fp_ihfa_img4.tif	(x=1696.38 y=1735.37)	1	1	430.75	26.293234	5.493126
b140	0	Fperrara_SingleCell_Microscopy	fp_ihfa_img4.tif	(x=1727.53 y=1091.71)	1	1	240.125	19.100103	4.94687
b141	0	Fperrara_SingleCell_Microscopy	fp_ihfa_img4.tif	(x=1736.65 y=467.93)	1	1	382.125	28.29154	5.0786247
b142	0	Fperrara_SingleCell_Microscopy	fp_ihfa_img4.tif	(x=1751.15 y=1822.47)	1	1	408.25	32.244556	5.1021285
b143	0	Fperrara_SingleCell_Microscopy	fp_ihfa_img4.tif	(x=1798.36 y=1313.56)	1	1	163.75	16.247347	4.297899
b144	0	Fperrara_SingleCell_Microscopy	fp_ihfa_img4.tif	(x=1810.76 y=258.92)	1	1	635.53125	34.057854	5.3964243
b145	0	Fperrara_SingleCell_Microscopy	fp_ihfa_img4.tif	(x=1825.03 y=447.78)	1	1	313.53125	20.779125	5.1220136
b146	0	Fperrara_SingleCell_Microscopy	fp_ihfa_img4.tif	(x=1834.30 y=1209.38)	1	1	320.25	23.116787	5.1455336
b147	0	Fperrara_SingleCell_Microscopy	fp_ihfa_img4.tif	(x=1854.31 y=649.46)	1	1	289.5625	25.108555	4.5096445
b148	0	Fperrara_SingleCell_Microscopy	fp_ihfa_img4.tif	(x=1876.10 y=1636.91)	1	1	456.0	37.402935	4.722734
b149	0	Fperrara_SingleCell_Microscopy	fp_ihfa_img4.tif	(x=1871.05 y=39.10)	1	1	302.93555	21.610458	4.338786
b150	0	Fperrara_SingleCell_Microscopy	fp_ihfa_img4.tif	(x=1879.26 y=530.56)	1	1	419.34375	25.228981	5.4398847
b153	0	Fperrara_SingleCell_Microscopy	fp_ihfa_img4.tif	(x=1909.66 y=617.40)	1	1	436.75	25.77012	5.29589
b154	0	Fperrara_SingleCell_Microscopy	fp_ihfa_img4.tif	(x=1907.72 y=1720.71)	1	1	134.375	13.8288355	4.421429
b155	0	Fperrara_SingleCell_Microscopy	fp_ihfa_img4.tif	(x=1920.62 y=1406.73)	1	1	179.25	15.199903	4.632953
b158	0	Fperrara_SingleCell_Microscopy	fp_ihfa_img4.tif	(x=1976.37 y=1862.40)	1	1	387.25	31.348614	4.888247
b159	0	Fperrara_SingleCell_Microscopy	fp_ihfa_img4.tif	(x=2019.45 y=1613.09)	1	1	435.25	34.024727	5.1448174
b174	0	Fperrara_SingleCell_Microscopy	fp_ihfa_img4.tif	(x=501.07 y=372.32)	1	1	544.53906	34.428192	4.1422625
b190	0	Fperrara_SingleCell_Microscopy	fp_ihfa_img4.tif	(x=1705.74 y=1502.49)	1	1	285.0	21.99421	5.466732
b191	0	Fperrara_SingleCell_Microscopy	fp_ihfa_img4.tif	(x=1727.39 y=1503.86)	1	1	675.0	50.2043	5.38009
b1	0	Fperrara_SingleCell_Microscopy	fp_ihfa_img5.tif	(x=41.79 y=526.85)	1	1	246.63965	18.556288	5.66616
b2	0	Fperrara_SingleCell_Microscopy	fp_ihfa_img5.tif	(x=48.33 y=29.11)	1	1	389.0261	26.1498	6.1770077
b3	0	Fperrara_SingleCell_Microscopy	fp_ihfa_img5.tif	(x=75.63 y=1897.72)	1	1	406.01172	24.730692	5.1210895
b4	0	Fperrara_SingleCell_Microscopy	fp_ihfa_img5.tif	(x=87.49 y=1440.14)	1	1	862.9219	67.43724	5.0637007
b5	0	Fperrara_SingleCell_Microscopy	fp_ihfa_img5.tif	(x=94.24 y=1802.74)	1	1	720.2969	43.48213	5.4181075
b6	0	Fperrara_SingleCell_Microscopy	fp_ihfa_img5.tif	(x=119.05 y=671.54)	1	1	114.21484	12.057103	4.856086
b7	0	Fperrara_SingleCell_Microscopy	fp_ihfa_img5.tif	(x=134.21 y=1519.90)	1	1	453.97656	31.402288	5.4550514
b9	0	Fperrara_SingleCell_Microscopy	fp_ihfa_img5.tif	(x=188.54 y=1919.88)	1	1	713.0781	44.862373	5.119325
b11	0	Fperrara_SingleCell_Microscopy	fp_ihfa_img5.tif	(x=200.82 y=1079.40)	1	1	354.8125	25.878395	5.6001406
b14	0	Fperrara_SingleCell_Microscopy	fp_ihfa_img5.tif	(x=220.33 y=359.74)	1	1	687.71875	42.276817	5.586753
b16	0	Fperrara_SingleCell_Microscopy	fp_ihfa_img5.tif	(x=232.34 y=113.46)	1	1	314.09668	21.294052	5.5127378
b17	0	Fperrara_SingleCell_Microscopy	fp_ihfa_img5.tif	(x=243.21 y=1730.22)	1	1	272.39062	18.80406	5.074841
b18	0	Fperrara_SingleCell_Microscopy	fp_ihfa_img5.tif	(x=272.21 y=782.54)	1	1	409.27344	24.103867	5.823922
b21	0	Fperrara_SingleCell_Microscopy	fp_ihfa_img5.tif	(x=311.31 y=1346.83)	1	1	443.4375	34.73235	5.3338194
b24	0	Fperrara_SingleCell_Microscopy	fp_ihfa_img5.tif	(x=362.65 y=1518.71)	1	1	966.3281	65.82689	5.224411
b26	0	Fperrara_SingleCell_Microscopy	fp_ihfa_img5.tif	(x=352.52 y=1671.42)	1	1	366.59375	25.54204	5.1624565
b33	0	Fperrara_SingleCell_Microscopy	fp_ihfa_img5.tif	(x=422.24 y=64.85)	1	1	377.97754	23.807903	6.09411
b34	0	Fperrara_SingleCell_Microscopy	fp_ihfa_img5.tif	(x=419.65 y=1850.10)	1	1	241.21875	20.543936	4.862658
b37	0	Fperrara_SingleCell_Microscopy	fp_ihfa_img5.tif	(x=446.30 y=1281.50)	1	1	254.65625	20.84407	5.098914
b39	0	Fperrara_SingleCell_Microscopy	fp_ihfa_img5.tif	(x=445.93 y=1859.00)	1	1	93.96875	12.143078	4.054217
b40	0	Fperrara_SingleCell_Microscopy	fp_ihfa_img5.tif	(x=449.36 y=602.07)	1	1	207.25	16.915442	5.324381
b49	0	Fperrara_SingleCell_Microscopy	fp_ihfa_img5.tif	(x=491.47 y=782.07)	1	1	230.79688	17.78767	5.8137445
b52	0	Fperrara_SingleCell_Microscopy	fp_ihfa_img5.tif	(x=512.47 y=232.67)	1	1	1210.1328	39.267857	5.59611
b55	0	Fperrara_SingleCell_Microscopy	fp_ihfa_img5.tif	(x=510.67 y=1369.28)	1	1	372.625	28.984257	5.61995
b56	0	Fperrara_SingleCell_Microscopy	fp_ihfa_img5.tif	(x=515.13 y=1531.18)	1	1	371.0625	22.405817	5.8603187
b61	0	Fperrara_SingleCell_Microscopy	fp_ihfa_img5.tif	(x=535.56 y=377.37)	1	1	414.10156	25.911804	6.1827793
b62	0	Fperrara_SingleCell_Microscopy	fp_ihfa_img5.tif	(x=562.49 y=1657.41)	1	1	604.90625	38.509323	5.387496
b63	0	Fperrara_SingleCell_Microscopy	fp_ihfa_img5.tif	(x=559.29 y=1007.58)	1	1	278.53125	18.883839	5.089582
b64	0	Fperrara_SingleCell_Microscopy	fp_ihfa_img5.tif	(x=561.45 y=132.15)	1	1	378.70703	24.79348	6.0890136
b65	0	Fperrara_SingleCell_Microscopy	fp_ihfa_img5.tif	(x=574.50 y=1205.96)	1	1	527.625	41.296005	5.5558553
b66	0	Fperrara_SingleCell_Microscopy	fp_ihfa_img5.tif	(x=596.82 y=1351.81)	1	1	831.15625	58.306133	5.5827794
b67	0	Fperrara_SingleCell_Microscopy	fp_ihfa_img5.tif	(x=599.49 y=188.61)	1	1	365.96875	42.772358	4.035869
b68	0	Fperrara_SingleCell_Microscopy	fp_ihfa_img5.tif	(x=623.32 y=1973.40)	1	1	410.6875	31.060741	5.454514
b73	0	Fperrara_SingleCell_Microscopy	fp_ihfa_img5.tif	(x=671.43 y=539.36)	1	1	564.1875	36.026634	6.111652
b75	0	Fperrara_SingleCell_Microscopy	fp_ihfa_img5.tif	(x=670.48 y=1156.40)	1	1	552.96875	38.938473	5.7334723
b80	0	Fperrara_SingleCell_Microscopy	fp_ihfa_img5.tif	(x=706.34 y=1570.68)	1	1	456.4375	33.3516	5.5738606
b82	0	Fperrara_SingleCell_Microscopy	fp_ihfa_img5.tif	(x=773.45 y=1229.83)	1	1	1265.5	70.72793	5.4082174
b83	0	Fperrara_SingleCell_Microscopy	fp_ihfa_img5.tif	(x=759.43 y=1621.39)	1	1	555.75	43.780495	5.170783
b87	0	Fperrara_SingleCell_Microscopy	fp_ihfa_img5.tif	(x=766.51 y=993.05)	1	1	280.84375	23.916124	4.274038
b89	0	Fperrara_SingleCell_Microscopy	fp_ihfa_img5.tif	(x=772.05 y=1693.96)	1	1	304.8125	25.919382	5.434967
b92	0	Fperrara_SingleCell_Microscopy	fp_ihfa_img5.tif	(x=795.41 y=1988.77)	1	1	175.75	15.878833	4.6693377
b93	0	Fperrara_SingleCell_Microscopy	fp_ihfa_img5.tif	(x=806.75 y=1437.28)	1	1	507.375	28.520983	6.172481
b94	0	Fperrara_SingleCell_Microscopy	fp_ihfa_img5.tif	(x=806.44 y=919.23)	1	1	257.5	20.926	5.7025948
b97	0	Fperrara_SingleCell_Microscopy	fp_ihfa_img5.tif	(x=854.46 y=572.37)	1	1	620.875	52.153828	5.066808
b98	0	Fperrara_SingleCell_Microscopy	fp_ihfa_img5.tif	(x=874.58 y=901.97)	1	1	499.90625	33.22786	6.0582476
b99	0	Fperrara_SingleCell_Microscopy	fp_ihfa_img5.tif	(x=874.50 y=1629.71)	1	1	361.875	26.652802	5.880155
b101	0	Fperrara_SingleCell_Microscopy	fp_ihfa_img5.tif	(x=922.22 y=1911.45)	1	1	1070.375	66.89669	5.244825
b102	0	Fperrara_SingleCell_Microscopy	fp_ihfa_img5.tif	(x=915.80 y=1344.69)	1	1	97.4375	11.680481	4.608944
b106	0	Fperrara_SingleCell_Microscopy	fp_ihfa_img5.tif	(x=987.18 y=519.61)	1	1	408.21875	26.893057	6.1484914
b107	0	Fperrara_SingleCell_Microscopy	fp_ihfa_img5.tif	(x=1004.56 y=742.14)	1	1	816.6875	33.690315	4.0695786
b109	0	Fperrara_SingleCell_Microscopy	fp_ihfa_img5.tif	(x=1038.24 y=1941.05)	1	1	907.75	61.48714	5.193068
b110	0	Fperrara_SingleCell_Microscopy	fp_ihfa_img5.tif	(x=1029.91 y=1190.82)	1	1	376.6875	29.797173	5.936744
b113	0	Fperrara_SingleCell_Microscopy	fp_ihfa_img5.tif	(x=1047.46 y=1038.34)	1	1	477.9375	28.72105	5.2667313
b115	0	Fperrara_SingleCell_Microscopy	fp_ihfa_img5.tif	(x=1064.65 y=1585.91)	1	1	1022.3125	62.595966	5.80887
b116	0	Fperrara_SingleCell_Microscopy	fp_ihfa_img5.tif	(x=1076.85 y=756.16)	1	1	772.5	35.27095	6.5006514
b117	0	Fperrara_SingleCell_Microscopy	fp_ihfa_img5.tif	(x=1079.54 y=1877.58)	1	1	1057.9375	47.17672	4.807455
b119	0	Fperrara_SingleCell_Microscopy	fp_ihfa_img5.tif	(x=1112.55 y=468.49)	1	1	750.1406	49.140244	5.741291
b120	0	Fperrara_SingleCell_Microscopy	fp_ihfa_img5.tif	(x=1105.21 y=202.90)	1	1	408.47656	27.55446	5.820139
b122	0	Fperrara_SingleCell_Microscopy	fp_ihfa_img5.tif	(x=1153.88 y=2017.74)	1	1	151.125	14.246151	4.459375
b123	0	Fperrara_SingleCell_Microscopy	fp_ihfa_img5.tif	(x=1180.91 y=1360.71)	1	1	139.375	13.668485	4.9205647
b125	0	Fperrara_SingleCell_Microscopy	fp_ihfa_img5.tif	(x=1244.28 y=790.30)	1	1	287.59375	25.013885	5.2192235
b126	0	Fperrara_SingleCell_Microscopy	fp_ihfa_img5.tif	(x=1271.26 y=1740.63)	1	1	348.75	25.258986	5.8699126
b127	0	Fperrara_SingleCell_Microscopy	fp_ihfa_img5.tif	(x=1281.86 y=1999.61)	1	1	760.0	42.531116	5.39926
b128	0	Fperrara_SingleCell_Microscopy	fp_ihfa_img5.tif	(x=1277.88 y=1219.48)	1	1	224.375	18.713795	5.470157
b130	0	Fperrara_SingleCell_Microscopy	fp_ihfa_img5.tif	(x=1318.39 y=1631.23)	1	1	627.25	39.105373	6.3159013
b131	0	Fperrara_SingleCell_Microscopy	fp_ihfa_img5.tif	(x=1360.07 y=652.19)	1	1	240.65625	18.536112	5.3485017
b132	0	Fperrara_SingleCell_Microscopy	fp_ihfa_img5.tif	(x=1396.59 y=1403.23)	1	1	1022.9375	48.513805	5.8647003
b133	0	Fperrara_SingleCell_Microscopy	fp_ihfa_img5.tif	(x=1400.02 y=624.04)	1	1	630.9375	29.077404	5.8969374
b134	0	Fperrara_SingleCell_Microscopy	fp_ihfa_img5.tif	(x=1418.63 y=114.33)	1	1	801.5625	75.20966	4.4653544
b137	0	Fperrara_SingleCell_Microscopy	fp_ihfa_img5.tif	(x=1444.83 y=434.53)	1	1	299.21875	19.922817	5.449674
b138	0	Fperrara_SingleCell_Microscopy	fp_ihfa_img5.tif	(x=1449.80 y=1315.85)	1	1	361.6875	25.432365	5.444744
b139	0	Fperrara_SingleCell_Microscopy	fp_ihfa_img5.tif	(x=1460.04 y=1551.38)	1	1	388.625	24.01986	6.1066566
b140	0	Fperrara_SingleCell_Microscopy	fp_ihfa_img5.tif	(x=1462.92 y=150.39)	1	1	522.83594	29.611807	6.0660896
b141	0	Fperrara_SingleCell_Microscopy	fp_ihfa_img5.tif	(x=1473.32 y=706.08)	1	1	563.46875	42.243095	4.9481277
b142	0	Fperrara_SingleCell_Microscopy	fp_ihfa_img5.tif	(x=1540.74 y=1140.29)	1	1	518.25	33.33888	5.7077165
b143	0	Fperrara_SingleCell_Microscopy	fp_ihfa_img5.tif	(x=1539.23 y=2017.37)	1	1	732.875	36.217968	5.1974974
b144	0	Fperrara_SingleCell_Microscopy	fp_ihfa_img5.tif	(x=1568.16 y=40.15)	1	1	633.2754	29.218527	5.9152355
b145	0	Fperrara_SingleCell_Microscopy	fp_ihfa_img5.tif	(x=1577.25 y=1421.45)	1	1	427.25	25.499687	6.160884
b146	0	Fperrara_SingleCell_Microscopy	fp_ihfa_img5.tif	(x=1601.70 y=1920.06)	1	1	582.5	41.178783	5.4214234
b147	0	Fperrara_SingleCell_Microscopy	fp_ihfa_img5.tif	(x=1602.82 y=318.19)	1	1	649.4375	44.639843	5.365626
b149	0	Fperrara_SingleCell_Microscopy	fp_ihfa_img5.tif	(x=1607.46 y=1508.23)	1	1	687.75	29.475264	6.528892
b150	0	Fperrara_SingleCell_Microscopy	fp_ihfa_img5.tif	(x=1612.00 y=620.13)	1	1	353.6875	25.516838	5.065929
b152	0	Fperrara_SingleCell_Microscopy	fp_ihfa_img5.tif	(x=1622.90 y=150.96)	1	1	351.95312	22.670004	5.2488117
b154	0	Fperrara_SingleCell_Microscopy	fp_ihfa_img5.tif	(x=1624.56 y=1415.92)	1	1	470.625	32.621742	5.700905
b155	0	Fperrara_SingleCell_Microscopy	fp_ihfa_img5.tif	(x=1672.02 y=1693.06)	1	1	249.75	29.44998	4.702661
b156	0	Fperrara_SingleCell_Microscopy	fp_ihfa_img5.tif	(x=1682.15 y=1891.64)	1	1	329.0	24.186073	5.3848963
b157	0	Fperrara_SingleCell_Microscopy	fp_ihfa_img5.tif	(x=1715.08 y=1539.70)	1	1	1045.5	45.125835	6.0001287
b159	0	Fperrara_SingleCell_Microscopy	fp_ihfa_img5.tif	(x=1712.03 y=1836.14)	1	1	293.25	20.0055	5.375763
b160	0	Fperrara_SingleCell_Microscopy	fp_ihfa_img5.tif	(x=1714.29 y=912.13)	1	1	326.25	20.457993	4.498945
b161	0	Fperrara_SingleCell_Microscopy	fp_ihfa_img5.tif	(x=1733.15 y=298.38)	1	1	826.3906	52.964413	5.469364
b162	0	Fperrara_SingleCell_Microscopy	fp_ihfa_img5.tif	(x=1725.05 y=1635.56)	1	1	298.0	22.859522	5.325114
b163	0	Fperrara_SingleCell_Microscopy	fp_ihfa_img5.tif	(x=1759.86 y=1668.35)	1	1	197.625	20.174227	4.5933924
b164	0	Fperrara_SingleCell_Microscopy	fp_ihfa_img5.tif	(x=1764.90 y=1642.55)	1	1	399.375	25.40311	5.4460807
b165	0	Fperrara_SingleCell_Microscopy	fp_ihfa_img5.tif	(x=1768.54 y=1000.09)	1	1	315.8125	19.970694	5.1955695
b166	0	Fperrara_SingleCell_Microscopy	fp_ihfa_img5.tif	(x=1779.72 y=972.63)	1	1	167.875	16.280657	4.2295566
b172	0	Fperrara_SingleCell_Microscopy	fp_ihfa_img5.tif	(x=1816.81 y=980.64)	1	1	372.875	24.459217	4.574305
b174	0	Fperrara_SingleCell_Microscopy	fp_ihfa_img5.tif	(x=1830.29 y=299.27)	1	1	339.90625	20.88092	4.9209085
b175	0	Fperrara_SingleCell_Microscopy	fp_ihfa_img5.tif	(x=1867.16 y=422.43)	1	1	266.9375	21.412704	4.536576
b176	0	Fperrara_SingleCell_Microscopy	fp_ihfa_img5.tif	(x=1876.12 y=1809.18)	1	1	461.5	27.682985	5.9187546
b177	0	Fperrara_SingleCell_Microscopy	fp_ihfa_img5.tif	(x=1904.30 y=1364.40)	1	1	1003.25	62.118465	5.7083597
b186	0	Fperrara_SingleCell_Microscopy	fp_ihfa_img5.tif	(x=1958.72 y=1529.05)	1	1	1336.5	75.81767	5.5838284
b187	0	Fperrara_SingleCell_Microscopy	fp_ihfa_img5.tif	(x=1960.90 y=1230.24)	1	1	408.625	22.807016	5.523409
b188	0	Fperrara_SingleCell_Microscopy	fp_ihfa_img5.tif	(x=1981.44 y=875.55)	1	1	411.625	27.13354	5.1972756
b189	0	Fperrara_SingleCell_Microscopy	fp_ihfa_img5.tif	(x=1982.71 y=922.31)	1	1	761.5	43.661476	5.9090033
b190	0	Fperrara_SingleCell_Microscopy	fp_ihfa_img5.tif	(x=2003.39 y=1474.44)	1	1	392.75	25.1641	4.2324505
b213	0	Fperrara_SingleCell_Microscopy	fp_ihfa_img5.tif	(x=913.17 y=188.14)	1	1	325.1875	23.720425	4.4983993
b214	0	Fperrara_SingleCell_Microscopy	fp_ihfa_img5.tif	(x=935.12 y=198.29)	1	1	530.39844	37.30737	4.7728896
b215	0	Fperrara_SingleCell_Microscopy	fp_ihfa_img5.tif	(x=945.18 y=181.46)	1	1	278.4453	28.237797	4.938105
b226	0	Fperrara_SingleCell_Microscopy	fp_ihfa_img5.tif	(x=1368.22 y=731.75)	1	1	1037.0938	74.12934	4.574081
b227	0	Fperrara_SingleCell_Microscopy	fp_ihfa_img5.tif	(x=1386.19 y=715.72)	1	1	593.8125	33.830032	4.519663
b7	0	Fperrara_SingleCell_Microscopy	fp_hcp1_img1.tif	(x=22.84 y=698.44)	1	1	520.20605	41.10472	4.1256123
b10	0	Fperrara_SingleCell_Microscopy	fp_hcp1_img1.tif	(x=36.16 y=565.73)	1	1	644.49194	47.741924	7.162665
b11	0	Fperrara_SingleCell_Microscopy	fp_hcp1_img1.tif	(x=39.72 y=1930.80)	1	1	637.24023	35.159546	6.438193
b14	0	Fperrara_SingleCell_Microscopy	fp_hcp1_img1.tif	(x=69.13 y=573.87)	1	1	547.3135	45.285645	4.6791115
b18	0	Fperrara_SingleCell_Microscopy	fp_hcp1_img1.tif	(x=90.57 y=1372.47)	1	1	156.76172	15.014915	5.497327
b25	0	Fperrara_SingleCell_Microscopy	fp_hcp1_img1.tif	(x=124.75 y=1772.61)	1	1	401.32812	25.565117	6.3477583
b27	0	Fperrara_SingleCell_Microscopy	fp_hcp1_img1.tif	(x=123.71 y=667.87)	1	1	331.83984	27.67963	4.815393
b35	0	Fperrara_SingleCell_Microscopy	fp_hcp1_img1.tif	(x=165.04 y=1943.21)	1	1	726.0469	52.703144	5.8887386
b37	0	Fperrara_SingleCell_Microscopy	fp_hcp1_img1.tif	(x=177.83 y=964.81)	1	1	173.71094	16.566076	4.918766
b39	0	Fperrara_SingleCell_Microscopy	fp_hcp1_img1.tif	(x=194.36 y=1428.91)	1	1	602.1719	36.84281	6.8564086
b47	0	Fperrara_SingleCell_Microscopy	fp_hcp1_img1.tif	(x=230.41 y=996.82)	1	1	378.60156	38.4744	4.2142954
b62	0	Fperrara_SingleCell_Microscopy	fp_hcp1_img1.tif	(x=279.27 y=240.29)	1	1	265.79883	18.402506	7.0322356
b64	0	Fperrara_SingleCell_Microscopy	fp_hcp1_img1.tif	(x=284.13 y=562.47)	1	1	265.4922	23.488134	6.45224
b67	0	Fperrara_SingleCell_Microscopy	fp_hcp1_img1.tif	(x=299.52 y=914.73)	1	1	209.09375	22.462433	6.267871
b78	0	Fperrara_SingleCell_Microscopy	fp_hcp1_img1.tif	(x=360.37 y=437.68)	1	1	216.0	20.183239	6.817825
b81	0	Fperrara_SingleCell_Microscopy	fp_hcp1_img1.tif	(x=368.32 y=677.76)	1	1	232.02344	17.495129	6.569215
b84	0	Fperrara_SingleCell_Microscopy	fp_hcp1_img1.tif	(x=384.10 y=183.90)	1	1	444.91406	37.05966	5.4787974
b85	0	Fperrara_SingleCell_Microscopy	fp_hcp1_img1.tif	(x=383.69 y=1334.12)	1	1	294.5	21.842697	5.0772724
b92	0	Fperrara_SingleCell_Microscopy	fp_hcp1_img1.tif	(x=441.87 y=1252.92)	1	1	254.84375	20.660759	4.4257035
b96	0	Fperrara_SingleCell_Microscopy	fp_hcp1_img1.tif	(x=459.83 y=1342.28)	1	1	592.1875	31.533123	6.652451
b98	0	Fperrara_SingleCell_Microscopy	fp_hcp1_img1.tif	(x=462.85 y=1854.61)	1	1	242.875	23.67602	5.604225
b101	0	Fperrara_SingleCell_Microscopy	fp_hcp1_img1.tif	(x=471.02 y=1450.48)	1	1	426.625	31.310112	4.60227
b106	0	Fperrara_SingleCell_Microscopy	fp_hcp1_img1.tif	(x=487.05 y=333.40)	1	1	95.97656	12.893787	5.0553617
b109	0	Fperrara_SingleCell_Microscopy	fp_hcp1_img1.tif	(x=494.57 y=1299.06)	1	1	348.65625	23.340084	6.9763193
b112	0	Fperrara_SingleCell_Microscopy	fp_hcp1_img1.tif	(x=524.25 y=1569.76)	1	1	114.5625	12.281716	5.1576552
b113	0	Fperrara_SingleCell_Microscopy	fp_hcp1_img1.tif	(x=544.32 y=434.80)	1	1	847.03906	43.003136	7.460389
b114	0	Fperrara_SingleCell_Microscopy	fp_hcp1_img1.tif	(x=542.16 y=1736.92)	1	1	1043.9688	44.830418	6.7471976
b115	0	Fperrara_SingleCell_Microscopy	fp_hcp1_img1.tif	(x=538.30 y=937.36)	1	1	236.35938	20.253431	6.8406954
b119	0	Fperrara_SingleCell_Microscopy	fp_hcp1_img1.tif	(x=555.27 y=351.78)	1	1	342.02344	31.422388	4.4042473
b125	0	Fperrara_SingleCell_Microscopy	fp_hcp1_img1.tif	(x=580.15 y=1564.73)	1	1	146.25	13.961888	5.652468
b128	0	Fperrara_SingleCell_Microscopy	fp_hcp1_img1.tif	(x=585.46 y=359.92)	1	1	250.34375	21.111498	4.5533786
b130	0	Fperrara_SingleCell_Microscopy	fp_hcp1_img1.tif	(x=596.94 y=236.67)	1	1	189.03906	22.244099	6.040184
b131	0	Fperrara_SingleCell_Microscopy	fp_hcp1_img1.tif	(x=600.71 y=281.24)	1	1	343.01562	27.529814	6.8094964
b139	0	Fperrara_SingleCell_Microscopy	fp_hcp1_img1.tif	(x=627.44 y=1754.36)	1	1	330.5	27.039389	6.0566254
b147	0	Fperrara_SingleCell_Microscopy	fp_hcp1_img1.tif	(x=658.06 y=757.05)	1	1	916.90625	42.385246	5.235798
b150	0	Fperrara_SingleCell_Microscopy	fp_hcp1_img1.tif	(x=664.04 y=1066.64)	1	1	495.3125	25.651127	7.2883368
b153	0	Fperrara_SingleCell_Microscopy	fp_hcp1_img1.tif	(x=684.10 y=1642.43)	1	1	315.6875	20.557028	6.5693226
b158	0	Fperrara_SingleCell_Microscopy	fp_hcp1_img1.tif	(x=714.61 y=1965.35)	1	1	217.0625	23.81001	4.364088
b166	0	Fperrara_SingleCell_Microscopy	fp_hcp1_img1.tif	(x=747.70 y=419.36)	1	1	192.48438	16.489182	6.77578
b180	0	Fperrara_SingleCell_Microscopy	fp_hcp1_img1.tif	(x=793.05 y=1373.69)	1	1	375.5625	31.85326	6.374256
b183	0	Fperrara_SingleCell_Microscopy	fp_hcp1_img1.tif	(x=805.77 y=827.11)	1	1	467.625	29.876322	5.310648
b186	0	Fperrara_SingleCell_Microscopy	fp_hcp1_img1.tif	(x=815.40 y=566.32)	1	1	275.96875	22.744171	7.258272
b187	0	Fperrara_SingleCell_Microscopy	fp_hcp1_img1.tif	(x=874.53 y=191.72)	1	1	1449.25	124.68735	4.3436522
b194	0	Fperrara_SingleCell_Microscopy	fp_hcp1_img1.tif	(x=858.04 y=326.02)	1	1	117.984375	16.154877	4.0307364
b198	0	Fperrara_SingleCell_Microscopy	fp_hcp1_img1.tif	(x=918.08 y=1237.95)	1	1	380.75	25.296782	7.0601745
b199	0	Fperrara_SingleCell_Microscopy	fp_hcp1_img1.tif	(x=917.04 y=854.77)	1	1	379.0625	24.633371	7.3754263
b201	0	Fperrara_SingleCell_Microscopy	fp_hcp1_img1.tif	(x=926.89 y=1336.46)	1	1	248.875	21.754526	4.051513
b207	0	Fperrara_SingleCell_Microscopy	fp_hcp1_img1.tif	(x=967.72 y=738.09)	1	1	349.84375	21.320538	7.2853994
b208	0	Fperrara_SingleCell_Microscopy	fp_hcp1_img1.tif	(x=984.57 y=541.91)	1	1	271.42188	29.114492	5.3452415
b210	0	Fperrara_SingleCell_Microscopy	fp_hcp1_img1.tif	(x=1001.16 y=82.60)	1	1	653.53906	44.895557	5.408799
b211	0	Fperrara_SingleCell_Microscopy	fp_hcp1_img1.tif	(x=1004.71 y=1757.19)	1	1	648.25	48.876274	4.7441974
b212	0	Fperrara_SingleCell_Microscopy	fp_hcp1_img1.tif	(x=1015.43 y=1693.83)	1	1	503.8125	29.258785	7.097095
b215	0	Fperrara_SingleCell_Microscopy	fp_hcp1_img1.tif	(x=1063.48 y=1929.41)	1	1	474.0	43.218853	4.578145
b224	0	Fperrara_SingleCell_Microscopy	fp_hcp1_img1.tif	(x=1096.46 y=786.27)	1	1	278.125	24.646046	6.7149477
b227	0	Fperrara_SingleCell_Microscopy	fp_hcp1_img1.tif	(x=1112.35 y=213.14)	1	1	283.04688	23.747343	4.8594093
b228	0	Fperrara_SingleCell_Microscopy	fp_hcp1_img1.tif	(x=1120.60 y=1019.00)	1	1	381.875	30.705585	4.1259
b234	0	Fperrara_SingleCell_Microscopy	fp_hcp1_img1.tif	(x=1166.42 y=1454.94)	1	1	319.375	25.603436	4.3202877
b240	0	Fperrara_SingleCell_Microscopy	fp_hcp1_img1.tif	(x=1198.15 y=947.46)	1	1	294.1875	23.693052	5.0593586
b247	0	Fperrara_SingleCell_Microscopy	fp_hcp1_img1.tif	(x=1261.18 y=406.38)	1	1	325.28125	28.062824	6.7071023
b250	0	Fperrara_SingleCell_Microscopy	fp_hcp1_img1.tif	(x=1277.36 y=167.23)	1	1	135.48438	14.494039	4.9972134
b252	0	Fperrara_SingleCell_Microscopy	fp_hcp1_img1.tif	(x=1321.94 y=1088.11)	1	1	342.375	23.792711	7.2751207
b254	0	Fperrara_SingleCell_Microscopy	fp_hcp1_img1.tif	(x=1341.01 y=1410.70)	1	1	167.6875	18.822624	4.0286584
b257	0	Fperrara_SingleCell_Microscopy	fp_hcp1_img1.tif	(x=1353.36 y=1427.34)	1	1	371.3125	28.502392	6.9462733
b270	0	Fperrara_SingleCell_Microscopy	fp_hcp1_img1.tif	(x=1412.24 y=1045.81)	1	1	271.3125	21.986113	5.5235667
b274	0	Fperrara_SingleCell_Microscopy	fp_hcp1_img1.tif	(x=1432.39 y=1894.73)	1	1	340.5	25.197502	6.9346833
b277	0	Fperrara_SingleCell_Microscopy	fp_hcp1_img1.tif	(x=1460.89 y=1783.10)	1	1	425.5	37.479355	4.5204554
b280	0	Fperrara_SingleCell_Microscopy	fp_hcp1_img1.tif	(x=1473.08 y=352.09)	1	1	324.53125	24.046595	7.08033
b281	0	Fperrara_SingleCell_Microscopy	fp_hcp1_img1.tif	(x=1472.71 y=300.22)	1	1	227.15625	21.708714	4.744707
b283	0	Fperrara_SingleCell_Microscopy	fp_hcp1_img1.tif	(x=1489.08 y=673.83)	1	1	707.28125	59.622787	5.001928
b284	0	Fperrara_SingleCell_Microscopy	fp_hcp1_img1.tif	(x=1485.30 y=616.85)	1	1	720.65625	57.68075	5.96022
b286	0	Fperrara_SingleCell_Microscopy	fp_hcp1_img1.tif	(x=1495.15 y=80.62)	1	1	345.21094	24.884594	5.107091
b294	0	Fperrara_SingleCell_Microscopy	fp_hcp1_img1.tif	(x=1541.22 y=1354.96)	1	1	436.3125	34.075623	4.8630643
b298	0	Fperrara_SingleCell_Microscopy	fp_hcp1_img1.tif	(x=1564.88 y=1049.84)	1	1	320.25	20.227997	7.2983174
b301	0	Fperrara_SingleCell_Microscopy	fp_hcp1_img1.tif	(x=1588.66 y=627.90)	1	1	289.0	22.28607	4.2231264
b306	0	Fperrara_SingleCell_Microscopy	fp_hcp1_img1.tif	(x=1631.55 y=1779.37)	1	1	254.75	22.91108	4.3616037
b308	0	Fperrara_SingleCell_Microscopy	fp_hcp1_img1.tif	(x=1665.46 y=1257.91)	1	1	324.9375	25.150421	7.4566584
b310	0	Fperrara_SingleCell_Microscopy	fp_hcp1_img1.tif	(x=1677.16 y=560.96)	1	1	1101.4375	66.589905	6.183447
b311	0	Fperrara_SingleCell_Microscopy	fp_hcp1_img1.tif	(x=1672.20 y=1715.79)	1	1	566.125	29.610275	7.4753547
b316	0	Fperrara_SingleCell_Microscopy	fp_hcp1_img1.tif	(x=1693.95 y=1974.32)	1	1	206.875	16.710754	6.4874496
b318	0	Fperrara_SingleCell_Microscopy	fp_hcp1_img1.tif	(x=1706.63 y=1335.19)	1	1	296.5	23.927109	6.880272
b321	0	Fperrara_SingleCell_Microscopy	fp_hcp1_img1.tif	(x=1720.89 y=1563.15)	1	1	353.75	28.266497	4.305178
b324	0	Fperrara_SingleCell_Microscopy	fp_hcp1_img1.tif	(x=1752.37 y=1383.45)	1	1	600.5	39.00595	4.922329
b328	0	Fperrara_SingleCell_Microscopy	fp_hcp1_img1.tif	(x=1863.62 y=974.60)	1	1	1170.5	44.292805	4.836073
b329	0	Fperrara_SingleCell_Microscopy	fp_hcp1_img1.tif	(x=1864.89 y=1006.51)	1	1	174.6875	20.799944	4.3393235
b330	0	Fperrara_SingleCell_Microscopy	fp_hcp1_img1.tif	(x=1874.21 y=692.11)	1	1	608.125	29.503614	8.0480385
b334	0	Fperrara_SingleCell_Microscopy	fp_hcp1_img1.tif	(x=1907.32 y=455.86)	1	1	241.6875	23.012417	4.670797
b338	0	Fperrara_SingleCell_Microscopy	fp_hcp1_img1.tif	(x=1976.42 y=802.12)	1	1	406.375	38.87399	6.1395802
b343	0	Fperrara_SingleCell_Microscopy	fp_hcp1_img1.tif	(x=2022.70 y=237.75)	1	1	745.0625	38.41518	7.186454
b347	0	Fperrara_SingleCell_Microscopy	fp_hcp1_img1.tif	(x=2027.96 y=1311.88)	1	1	251.875	18.140755	6.8335853
b364	0	Fperrara_SingleCell_Microscopy	fp_hcp1_img1.tif	(x=336.60 y=839.68)	1	1	151.40625	17.400864	6.1278505
b365	0	Fperrara_SingleCell_Microscopy	fp_hcp1_img1.tif	(x=355.59 y=836.65)	1	1	711.6406	46.166283	6.922051
b11	0	Fperrara_SingleCell_Microscopy	fp_hcp1_img2.tif	(x=22.61 y=231.46)	1	1	575.9276	30.51259	6.3905354
b15	0	Fperrara_SingleCell_Microscopy	fp_hcp1_img2.tif	(x=36.13 y=871.55)	1	1	660.1172	50.024006	7.148909
b18	0	Fperrara_SingleCell_Microscopy	fp_hcp1_img2.tif	(x=37.15 y=1611.74)	1	1	446.55273	31.54542	6.6990156
b37	0	Fperrara_SingleCell_Microscopy	fp_hcp1_img2.tif	(x=71.77 y=139.17)	1	1	611.0696	41.662006	5.532065
b45	0	Fperrara_SingleCell_Microscopy	fp_hcp1_img2.tif	(x=71.71 y=380.31)	1	1	443.8125	28.173965	7.9466734
b52	0	Fperrara_SingleCell_Microscopy	fp_hcp1_img2.tif	(x=89.98 y=1632.83)	1	1	566.3164	50.215702	4.27208
b54	0	Fperrara_SingleCell_Microscopy	fp_hcp1_img2.tif	(x=89.34 y=544.34)	1	1	309.59375	24.650831	7.720779
b57	0	Fperrara_SingleCell_Microscopy	fp_hcp1_img2.tif	(x=89.84 y=723.35)	1	1	533.50977	33.855824	8.097375
b90	0	Fperrara_SingleCell_Microscopy	fp_hcp1_img2.tif	(x=130.54 y=975.20)	1	1	455.08203	34.143467	4.926123
b120	0	Fperrara_SingleCell_Microscopy	fp_hcp1_img2.tif	(x=175.99 y=382.78)	1	1	300.82617	23.980701	5.0296865
b121	0	Fperrara_SingleCell_Microscopy	fp_hcp1_img2.tif	(x=177.65 y=924.95)	1	1	301.34375	22.897722	5.8789062
b126	0	Fperrara_SingleCell_Microscopy	fp_hcp1_img2.tif	(x=183.15 y=979.04)	1	1	403.89844	26.332842	4.1948423
b129	0	Fperrara_SingleCell_Microscopy	fp_hcp1_img2.tif	(x=186.62 y=1312.51)	1	1	322.32812	20.786348	6.937726
b147	0	Fperrara_SingleCell_Microscopy	fp_hcp1_img2.tif	(x=215.82 y=573.20)	1	1	110.03516	12.459872	4.429497
b162	0	Fperrara_SingleCell_Microscopy	fp_hcp1_img2.tif	(x=245.27 y=1169.17)	1	1	790.1406	51.65684	6.9977264
b167	0	Fperrara_SingleCell_Microscopy	fp_hcp1_img2.tif	(x=258.82 y=1661.52)	1	1	266.82812	23.706093	5.630907
b174	0	Fperrara_SingleCell_Microscopy	fp_hcp1_img2.tif	(x=271.97 y=675.63)	1	1	263.89062	24.04572	4.334398
b208	0	Fperrara_SingleCell_Microscopy	fp_hcp1_img2.tif	(x=332.14 y=1647.02)	1	1	459.65625	39.286205	4.6894803
b223	0	Fperrara_SingleCell_Microscopy	fp_hcp1_img2.tif	(x=345.01 y=1947.50)	1	1	270.5625	24.76703	4.3710256
b238	0	Fperrara_SingleCell_Microscopy	fp_hcp1_img2.tif	(x=363.96 y=402.92)	1	1	220.32812	22.57999	4.0600886
b311	0	Fperrara_SingleCell_Microscopy	fp_hcp1_img2.tif	(x=505.12 y=1854.03)	1	1	120.84375	13.079304	4.25487
b329	0	Fperrara_SingleCell_Microscopy	fp_hcp1_img2.tif	(x=542.77 y=550.24)	1	1	181.46875	17.94354	5.036513
b334	0	Fperrara_SingleCell_Microscopy	fp_hcp1_img2.tif	(x=558.98 y=1634.90)	1	1	424.75	24.574827	5.6808157
b361	0	Fperrara_SingleCell_Microscopy	fp_hcp1_img2.tif	(x=588.41 y=1483.11)	1	1	397.8125	30.431316	5.2926755
b381	0	Fperrara_SingleCell_Microscopy	fp_hcp1_img2.tif	(x=612.37 y=694.65)	1	1	309.35938	24.32509	7.3635573
b421	0	Fperrara_SingleCell_Microscopy	fp_hcp1_img2.tif	(x=677.12 y=1957.24)	1	1	422.0	27.069012	6.9021697
b439	0	Fperrara_SingleCell_Microscopy	fp_hcp1_img2.tif	(x=717.76 y=1883.11)	1	1	652.1875	36.830677	7.588326
b467	0	Fperrara_SingleCell_Microscopy	fp_hcp1_img2.tif	(x=778.88 y=785.89)	1	1	346.5625	25.24321	5.2604494
b474	0	Fperrara_SingleCell_Microscopy	fp_hcp1_img2.tif	(x=798.23 y=81.89)	1	1	552.4629	36.332767	7.8014383
b480	0	Fperrara_SingleCell_Microscopy	fp_hcp1_img2.tif	(x=814.13 y=706.19)	1	1	212.65625	16.954565	6.987296
b481	0	Fperrara_SingleCell_Microscopy	fp_hcp1_img2.tif	(x=824.99 y=1466.50)	1	1	403.875	31.554214	5.058513
b489	0	Fperrara_SingleCell_Microscopy	fp_hcp1_img2.tif	(x=848.38 y=551.34)	1	1	420.15625	31.460302	4.4967146
b491	0	Fperrara_SingleCell_Microscopy	fp_hcp1_img2.tif	(x=855.59 y=177.74)	1	1	334.17188	22.248444	7.42681
b495	0	Fperrara_SingleCell_Microscopy	fp_hcp1_img2.tif	(x=864.73 y=1941.37)	1	1	886.1875	39.71087	7.86557
b513	0	Fperrara_SingleCell_Microscopy	fp_hcp1_img2.tif	(x=931.23 y=1768.09)	1	1	155.3125	19.895983	4.0347486
b521	0	Fperrara_SingleCell_Microscopy	fp_hcp1_img2.tif	(x=990.90 y=831.43)	1	1	323.875	28.047276	7.2480283
b522	0	Fperrara_SingleCell_Microscopy	fp_hcp1_img2.tif	(x=998.76 y=1889.85)	1	1	455.375	34.004	6.831912
b524	0	Fperrara_SingleCell_Microscopy	fp_hcp1_img2.tif	(x=1002.69 y=1430.72)	1	1	203.875	17.791681	6.662398
b536	0	Fperrara_SingleCell_Microscopy	fp_hcp1_img2.tif	(x=1089.50 y=317.14)	1	1	418.29688	26.930988	7.1083694
b553	0	Fperrara_SingleCell_Microscopy	fp_hcp1_img2.tif	(x=1191.84 y=1046.29)	1	1	465.0625	35.597466	6.76364
b556	0	Fperrara_SingleCell_Microscopy	fp_hcp1_img2.tif	(x=1213.80 y=1687.83)	1	1	381.0625	31.9962	4.1759152
b561	0	Fperrara_SingleCell_Microscopy	fp_hcp1_img2.tif	(x=1290.04 y=2038.12)	1	1	986.125	64.69376	7.9674106
b562	0	Fperrara_SingleCell_Microscopy	fp_hcp1_img2.tif	(x=1273.70 y=1184.12)	1	1	420.9375	27.728832	7.7484636
b570	0	Fperrara_SingleCell_Microscopy	fp_hcp1_img2.tif	(x=1355.66 y=281.07)	1	1	183.85938	17.777552	5.3310113
b580	0	Fperrara_SingleCell_Microscopy	fp_hcp1_img2.tif	(x=1424.03 y=726.15)	1	1	413.90625	38.080563	4.4298263
b588	0	Fperrara_SingleCell_Microscopy	fp_hcp1_img2.tif	(x=1500.34 y=1704.19)	1	1	365.0	32.527138	6.867827
b590	0	Fperrara_SingleCell_Microscopy	fp_hcp1_img2.tif	(x=1507.35 y=624.02)	1	1	250.09375	22.76793	5.9464273
b602	0	Fperrara_SingleCell_Microscopy	fp_hcp1_img2.tif	(x=1588.20 y=463.18)	1	1	137.96875	14.726478	4.575674
b606	0	Fperrara_SingleCell_Microscopy	fp_hcp1_img2.tif	(x=1623.73 y=1083.22)	1	1	525.75	44.04427	4.162583
b608	0	Fperrara_SingleCell_Microscopy	fp_hcp1_img2.tif	(x=1645.12 y=1576.12)	1	1	470.75	50.72176	4.0966578
b610	0	Fperrara_SingleCell_Microscopy	fp_hcp1_img2.tif	(x=1657.87 y=332.01)	1	1	878.1875	45.562855	4.7086053
b612	0	Fperrara_SingleCell_Microscopy	fp_hcp1_img2.tif	(x=1707.99 y=791.55)	1	1	302.6875	32.316887	4.3765635
b613	0	Fperrara_SingleCell_Microscopy	fp_hcp1_img2.tif	(x=1714.38 y=256.86)	1	1	538.4531	39.851074	4.229767
b614	0	Fperrara_SingleCell_Microscopy	fp_hcp1_img2.tif	(x=1719.80 y=1460.08)	1	1	445.5	31.692858	6.9975233
b615	0	Fperrara_SingleCell_Microscopy	fp_hcp1_img2.tif	(x=1726.64 y=945.36)	1	1	371.0	28.457829	4.1964245
b616	0	Fperrara_SingleCell_Microscopy	fp_hcp1_img2.tif	(x=1729.37 y=1581.83)	1	1	388.875	27.613224	4.6599183
b622	0	Fperrara_SingleCell_Microscopy	fp_hcp1_img2.tif	(x=1839.30 y=511.31)	1	1	198.6875	20.765392	4.6132793
b624	0	Fperrara_SingleCell_Microscopy	fp_hcp1_img2.tif	(x=1887.47 y=2022.22)	1	1	233.125	19.26841	6.657298
b625	0	Fperrara_SingleCell_Microscopy	fp_hcp1_img2.tif	(x=1956.72 y=203.54)	1	1	1725.1719	94.8146	6.5352817
b626	0	Fperrara_SingleCell_Microscopy	fp_hcp1_img2.tif	(x=1932.88 y=110.23)	1	1	369.52344	31.29547	5.088302
b627	0	Fperrara_SingleCell_Microscopy	fp_hcp1_img2.tif	(x=1944.51 y=1585.60)	1	1	676.625	53.229034	4.632376
b628	0	Fperrara_SingleCell_Microscopy	fp_hcp1_img2.tif	(x=1954.50 y=949.29)	1	1	434.875	32.006836	4.8453274
b629	0	Fperrara_SingleCell_Microscopy	fp_hcp1_img2.tif	(x=1959.85 y=1006.28)	1	1	370.875	24.532927	6.4991117
b635	0	Fperrara_SingleCell_Microscopy	fp_hcp1_img2.tif	(x=1980.03 y=2008.25)	1	1	210.5	16.079893	4.526129
b636	0	Fperrara_SingleCell_Microscopy	fp_hcp1_img2.tif	(x=1995.43 y=580.13)	1	1	422.8125	40.1078	5.4702067
b637	0	Fperrara_SingleCell_Microscopy	fp_hcp1_img2.tif	(x=1986.09 y=218.61)	1	1	129.70312	13.258783	5.2602844
b638	0	Fperrara_SingleCell_Microscopy	fp_hcp1_img2.tif	(x=1999.81 y=1286.67)	1	1	200.25	19.719948	4.5054035
b640	0	Fperrara_SingleCell_Microscopy	fp_hcp1_img2.tif	(x=2032.51 y=771.58)	1	1	240.6875	23.503557	4.9853697
b698	0	Fperrara_SingleCell_Microscopy	fp_hcp1_img2.tif	(x=1783.63 y=1867.67)	1	1	481.375	46.718773	4.0259857
b704	0	Fperrara_SingleCell_Microscopy	fp_hcp1_img2.tif	(x=1979.10 y=684.17)	1	1	302.6875	36.118137	4.6096134
b6	0	Fperrara_SingleCell_Microscopy	fp_hcp1_img3.tif	(x=23.94 y=494.43)	1	1	381.19165	23.53772	8.216902
b14	0	Fperrara_SingleCell_Microscopy	fp_hcp1_img3.tif	(x=71.30 y=854.74)	1	1	1244.9219	62.491737	4.98571
b15	0	Fperrara_SingleCell_Microscopy	fp_hcp1_img3.tif	(x=65.57 y=1118.93)	1	1	418.1504	34.62489	6.905144
b18	0	Fperrara_SingleCell_Microscopy	fp_hcp1_img3.tif	(x=64.47 y=428.06)	1	1	220.64258	17.400377	5.0184336
b40	0	Fperrara_SingleCell_Microscopy	fp_hcp1_img3.tif	(x=146.22 y=1498.64)	1	1	277.9297	20.588972	6.2796087
b50	0	Fperrara_SingleCell_Microscopy	fp_hcp1_img3.tif	(x=165.83 y=637.80)	1	1	454.75	39.413654	6.203436
b58	0	Fperrara_SingleCell_Microscopy	fp_hcp1_img3.tif	(x=194.87 y=1849.82)	1	1	153.09375	20.62714	4.425198
b65	0	Fperrara_SingleCell_Microscopy	fp_hcp1_img3.tif	(x=207.15 y=890.80)	1	1	262.0547	23.120855	4.212883
b71	0	Fperrara_SingleCell_Microscopy	fp_hcp1_img3.tif	(x=222.36 y=133.03)	1	1	556.48535	27.155594	8.359673
b94	0	Fperrara_SingleCell_Microscopy	fp_hcp1_img3.tif	(x=251.32 y=169.78)	1	1	132.35156	14.924627	5.4421606
b100	0	Fperrara_SingleCell_Microscopy	fp_hcp1_img3.tif	(x=272.22 y=1110.68)	1	1	777.25	35.162334	7.1290097
b104	0	Fperrara_SingleCell_Microscopy	fp_hcp1_img3.tif	(x=281.16 y=871.28)	1	1	537.2578	31.432497	4.3602242
b106	0	Fperrara_SingleCell_Microscopy	fp_hcp1_img3.tif	(x=278.57 y=1502.50)	1	1	386.32812	27.752766	6.72737
b125	0	Fperrara_SingleCell_Microscopy	fp_hcp1_img3.tif	(x=320.12 y=1903.39)	1	1	1794.0312	52.618004	6.563994
b128	0	Fperrara_SingleCell_Microscopy	fp_hcp1_img3.tif	(x=317.20 y=716.54)	1	1	575.7344	36.197926	4.5474257
b149	0	Fperrara_SingleCell_Microscopy	fp_hcp1_img3.tif	(x=385.86 y=669.87)	1	1	127.60156	19.85045	4.635452
b151	0	Fperrara_SingleCell_Microscopy	fp_hcp1_img3.tif	(x=396.55 y=1218.90)	1	1	525.21875	26.307384	6.902823
b167	0	Fperrara_SingleCell_Microscopy	fp_hcp1_img3.tif	(x=422.51 y=422.63)	1	1	263.22656	20.26252	5.2068048
b169	0	Fperrara_SingleCell_Microscopy	fp_hcp1_img3.tif	(x=440.08 y=1135.62)	1	1	181.82812	16.16461	5.0658603
b173	0	Fperrara_SingleCell_Microscopy	fp_hcp1_img3.tif	(x=447.20 y=952.68)	1	1	169.79688	16.592995	7.291035
b174	0	Fperrara_SingleCell_Microscopy	fp_hcp1_img3.tif	(x=450.96 y=1539.43)	1	1	349.21875	26.936533	7.0790787
b188	0	Fperrara_SingleCell_Microscopy	fp_hcp1_img3.tif	(x=480.42 y=428.67)	1	1	568.0703	34.05433	7.7112794
b189	0	Fperrara_SingleCell_Microscopy	fp_hcp1_img3.tif	(x=482.16 y=1308.86)	1	1	460.40625	38.734013	4.452399
b195	0	Fperrara_SingleCell_Microscopy	fp_hcp1_img3.tif	(x=488.63 y=803.90)	1	1	285.07812	22.987558	7.329012
b202	0	Fperrara_SingleCell_Microscopy	fp_hcp1_img3.tif	(x=502.72 y=294.60)	1	1	265.71875	22.199337	5.5531693
b213	0	Fperrara_SingleCell_Microscopy	fp_hcp1_img3.tif	(x=527.14 y=1518.56)	1	1	639.5	32.745056	7.729944
b235	0	Fperrara_SingleCell_Microscopy	fp_hcp1_img3.tif	(x=577.97 y=1932.92)	1	1	1051.375	42.654762	7.868411
b246	0	Fperrara_SingleCell_Microscopy	fp_hcp1_img3.tif	(x=603.06 y=100.06)	1	1	361.42188	23.510132	7.7254515
b275	0	Fperrara_SingleCell_Microscopy	fp_hcp1_img3.tif	(x=661.03 y=1677.53)	1	1	181.0	15.536532	5.773523
b285	0	Fperrara_SingleCell_Microscopy	fp_hcp1_img3.tif	(x=693.68 y=1761.58)	1	1	313.0625	25.311321	4.328868
b299	0	Fperrara_SingleCell_Microscopy	fp_hcp1_img3.tif	(x=725.58 y=1490.68)	1	1	238.375	20.38924	4.373115
b300	0	Fperrara_SingleCell_Microscopy	fp_hcp1_img3.tif	(x=732.83 y=1229.24)	1	1	462.28125	32.081985	4.5840135
b302	0	Fperrara_SingleCell_Microscopy	fp_hcp1_img3.tif	(x=731.94 y=499.83)	1	1	264.64062	20.355696	6.6669984
b304	0	Fperrara_SingleCell_Microscopy	fp_hcp1_img3.tif	(x=740.10 y=730.81)	1	1	486.375	38.723442	4.521031
b314	0	Fperrara_SingleCell_Microscopy	fp_hcp1_img3.tif	(x=759.33 y=1140.17)	1	1	416.59375	26.426756	7.4637146
b316	0	Fperrara_SingleCell_Microscopy	fp_hcp1_img3.tif	(x=771.85 y=823.78)	1	1	331.34375	27.006857	6.367602
b323	0	Fperrara_SingleCell_Microscopy	fp_hcp1_img3.tif	(x=814.97 y=1834.97)	1	1	327.125	30.288504	5.8429437
b326	0	Fperrara_SingleCell_Microscopy	fp_hcp1_img3.tif	(x=821.28 y=519.87)	1	1	372.21875	28.789982	4.5411496
b330	0	Fperrara_SingleCell_Microscopy	fp_hcp1_img3.tif	(x=837.05 y=1929.69)	1	1	492.875	36.426014	4.586108
b355	0	Fperrara_SingleCell_Microscopy	fp_hcp1_img3.tif	(x=925.19 y=1950.01)	1	1	476.625	25.955566	5.2553105
b368	0	Fperrara_SingleCell_Microscopy	fp_hcp1_img3.tif	(x=953.78 y=493.41)	1	1	268.0	21.768703	6.632979
b370	0	Fperrara_SingleCell_Microscopy	fp_hcp1_img3.tif	(x=962.17 y=293.35)	1	1	413.42188	35.404346	4.0361495
b379	0	Fperrara_SingleCell_Microscopy	fp_hcp1_img3.tif	(x=988.84 y=1943.55)	1	1	493.4375	37.385185	4.2968283
b395	0	Fperrara_SingleCell_Microscopy	fp_hcp1_img3.tif	(x=1084.12 y=1902.21)	1	1	2164.9375	52.495	4.53517
b430	0	Fperrara_SingleCell_Microscopy	fp_hcp1_img3.tif	(x=1249.50 y=1513.64)	1	1	287.5625	21.847795	7.0451674
b442	0	Fperrara_SingleCell_Microscopy	fp_hcp1_img3.tif	(x=1320.41 y=274.39)	1	1	323.32812	23.057377	7.2945323
b444	0	Fperrara_SingleCell_Microscopy	fp_hcp1_img3.tif	(x=1347.85 y=555.26)	1	1	294.71875	26.598913	4.259058
b449	0	Fperrara_SingleCell_Microscopy	fp_hcp1_img3.tif	(x=1415.16 y=1900.52)	1	1	459.75	33.20386	6.30817
b474	0	Fperrara_SingleCell_Microscopy	fp_hcp1_img3.tif	(x=1643.52 y=1295.12)	1	1	339.25	32.585533	6.012967
b482	0	Fperrara_SingleCell_Microscopy	fp_hcp1_img3.tif	(x=1677.60 y=1436.18)	1	1	365.5	23.10867	6.6948657
b484	0	Fperrara_SingleCell_Microscopy	fp_hcp1_img3.tif	(x=1686.19 y=1328.75)	1	1	408.125	41.35211	5.3919096
b485	0	Fperrara_SingleCell_Microscopy	fp_hcp1_img3.tif	(x=1683.61 y=904.09)	1	1	93.375	11.523983	4.9940014
b488	0	Fperrara_SingleCell_Microscopy	fp_hcp1_img3.tif	(x=1699.32 y=1440.87)	1	1	78.125	11.285711	4.1404085
b489	0	Fperrara_SingleCell_Microscopy	fp_hcp1_img3.tif	(x=1704.05 y=1302.07)	1	1	199.875	18.312853	4.8284917
b493	0	Fperrara_SingleCell_Microscopy	fp_hcp1_img3.tif	(x=1725.54 y=99.97)	1	1	421.125	32.243046	4.590797
b526	0	Fperrara_SingleCell_Microscopy	fp_hcp1_img3.tif	(x=1901.04 y=1137.74)	1	1	460.125	37.198273	4.951257
b545	0	Fperrara_SingleCell_Microscopy	fp_hcp1_img3.tif	(x=1999.13 y=1385.09)	1	1	655.875	30.806383	6.821705
b551	0	Fperrara_SingleCell_Microscopy	fp_hcp1_img3.tif	(x=2014.36 y=1044.08)	1	1	326.9375	22.370216	7.341667
b564	0	Fperrara_SingleCell_Microscopy	fp_hcp1_img3.tif	(x=49.17 y=83.58)	1	1	288.31604	41.4944	5.5563636
b565	0	Fperrara_SingleCell_Microscopy	fp_hcp1_img3.tif	(x=41.45 y=91.92)	1	1	116.736694	21.819199	5.2997093
b566	0	Fperrara_SingleCell_Microscopy	fp_hcp1_img3.tif	(x=56.97 y=107.53)	1	1	152.14648	28.49633	4.6631165
b567	0	Fperrara_SingleCell_Microscopy	fp_hcp1_img3.tif	(x=47.41 y=101.83)	1	1	244.60156	23.175707	5.2109694
b3	0	Fperrara_SingleCell_Microscopy	fp_hcp1_img4.tif	(x=23.67 y=1724.46)	1	1	390.8252	32.00379	5.2548437
b19	0	Fperrara_SingleCell_Microscopy	fp_hcp1_img4.tif	(x=65.00 y=1314.08)	1	1	84.43359	10.918819	4.3387775
b24	0	Fperrara_SingleCell_Microscopy	fp_hcp1_img4.tif	(x=80.99 y=1964.41)	1	1	376.79688	24.769316	6.476459
b26	0	Fperrara_SingleCell_Microscopy	fp_hcp1_img4.tif	(x=87.60 y=1155.68)	1	1	537.625	30.284014	4.6360173
b43	0	Fperrara_SingleCell_Microscopy	fp_hcp1_img4.tif	(x=159.88 y=899.63)	1	1	359.92188	30.264034	6.676328
b59	0	Fperrara_SingleCell_Microscopy	fp_hcp1_img4.tif	(x=253.75 y=601.86)	1	1	1297.3594	96.59598	4.6154637
b61	0	Fperrara_SingleCell_Microscopy	fp_hcp1_img4.tif	(x=246.01 y=72.05)	1	1	517.44434	39.403557	6.620958
b85	0	Fperrara_SingleCell_Microscopy	fp_hcp1_img4.tif	(x=355.78 y=1960.32)	1	1	271.34375	21.836239	6.229976
b90	0	Fperrara_SingleCell_Microscopy	fp_hcp1_img4.tif	(x=380.41 y=1678.55)	1	1	306.03125	25.718243	5.910343
b94	0	Fperrara_SingleCell_Microscopy	fp_hcp1_img4.tif	(x=401.90 y=476.87)	1	1	365.9297	31.65203	4.6523275
b98	0	Fperrara_SingleCell_Microscopy	fp_hcp1_img4.tif	(x=421.57 y=1034.34)	1	1	483.29688	36.968292	7.4313416
b99	0	Fperrara_SingleCell_Microscopy	fp_hcp1_img4.tif	(x=441.05 y=1622.17)	1	1	1327.4062	61.149597	7.2521815
b100	0	Fperrara_SingleCell_Microscopy	fp_hcp1_img4.tif	(x=435.32 y=1448.91)	1	1	264.21875	19.898092	4.128872
b106	0	Fperrara_SingleCell_Microscopy	fp_hcp1_img4.tif	(x=469.91 y=948.78)	1	1	318.34375	25.615932	5.0124087
b108	0	Fperrara_SingleCell_Microscopy	fp_hcp1_img4.tif	(x=475.81 y=349.43)	1	1	412.10156	23.565577	6.877832
b130	0	Fperrara_SingleCell_Microscopy	fp_hcp1_img4.tif	(x=536.24 y=556.34)	1	1	392.0	24.780428	7.285264
b138	0	Fperrara_SingleCell_Microscopy	fp_hcp1_img4.tif	(x=570.87 y=657.88)	1	1	277.29688	20.74975	6.8079486
b150	0	Fperrara_SingleCell_Microscopy	fp_hcp1_img4.tif	(x=593.21 y=581.75)	1	1	258.29688	22.628006	6.3977547
b160	0	Fperrara_SingleCell_Microscopy	fp_hcp1_img4.tif	(x=631.06 y=792.08)	1	1	278.25	24.3386	4.5091467
b170	0	Fperrara_SingleCell_Microscopy	fp_hcp1_img4.tif	(x=654.70 y=963.79)	1	1	273.09375	20.420414	6.8034253
b178	0	Fperrara_SingleCell_Microscopy	fp_hcp1_img4.tif	(x=672.08 y=1314.43)	1	1	616.28125	47.134567	6.777967
b181	0	Fperrara_SingleCell_Microscopy	fp_hcp1_img4.tif	(x=668.40 y=984.02)	1	1	248.0	20.72423	6.7830715
b184	0	Fperrara_SingleCell_Microscopy	fp_hcp1_img4.tif	(x=689.81 y=1967.28)	1	1	400.5625	32.721367	4.1609697
b200	0	Fperrara_SingleCell_Microscopy	fp_hcp1_img4.tif	(x=743.29 y=978.20)	1	1	409.46875	34.773506	4.68179
b202	0	Fperrara_SingleCell_Microscopy	fp_hcp1_img4.tif	(x=768.93 y=1770.10)	1	1	1891.8125	72.64004	4.1862235
b210	0	Fperrara_SingleCell_Microscopy	fp_hcp1_img4.tif	(x=765.83 y=1486.54)	1	1	396.0625	25.372963	4.9275885
b232	0	Fperrara_SingleCell_Microscopy	fp_hcp1_img4.tif	(x=845.11 y=749.69)	1	1	336.71875	26.862658	4.356643
b233	0	Fperrara_SingleCell_Microscopy	fp_hcp1_img4.tif	(x=866.87 y=1470.69)	1	1	2909.8125	72.39571	4.5469723
b240	0	Fperrara_SingleCell_Microscopy	fp_hcp1_img4.tif	(x=887.41 y=704.33)	1	1	533.25	42.22934	4.0434103
b247	0	Fperrara_SingleCell_Microscopy	fp_hcp1_img4.tif	(x=897.70 y=1911.85)	1	1	137.8125	14.560367	4.027028
b256	0	Fperrara_SingleCell_Microscopy	fp_hcp1_img4.tif	(x=945.43 y=1276.72)	1	1	392.875	24.510254	7.2848525
b262	0	Fperrara_SingleCell_Microscopy	fp_hcp1_img4.tif	(x=961.55 y=318.32)	1	1	313.17188	20.904703	6.114342
b276	0	Fperrara_SingleCell_Microscopy	fp_hcp1_img4.tif	(x=1028.36 y=1549.95)	1	1	142.125	24.334175	4.2691493
b277	0	Fperrara_SingleCell_Microscopy	fp_hcp1_img4.tif	(x=1042.14 y=1958.40)	1	1	375.25	32.460327	4.1621647
b294	0	Fperrara_SingleCell_Microscopy	fp_hcp1_img4.tif	(x=1088.75 y=585.78)	1	1	299.125	30.507069	4.1443667
b296	0	Fperrara_SingleCell_Microscopy	fp_hcp1_img4.tif	(x=1095.28 y=1018.82)	1	1	519.9375	28.659605	6.800521
b306	0	Fperrara_SingleCell_Microscopy	fp_hcp1_img4.tif	(x=1130.49 y=371.51)	1	1	241.28125	22.500677	4.0426106
b308	0	Fperrara_SingleCell_Microscopy	fp_hcp1_img4.tif	(x=1136.89 y=1968.16)	1	1	312.5	20.29317	5.8120728
b316	0	Fperrara_SingleCell_Microscopy	fp_hcp1_img4.tif	(x=1159.63 y=257.90)	1	1	236.51562	18.913738	4.418268
b323	0	Fperrara_SingleCell_Microscopy	fp_hcp1_img4.tif	(x=1209.11 y=173.26)	1	1	451.17188	43.441467	4.0303063
b337	0	Fperrara_SingleCell_Microscopy	fp_hcp1_img4.tif	(x=1465.11 y=1563.75)	1	1	124.75	13.763067	5.3698926
b339	0	Fperrara_SingleCell_Microscopy	fp_hcp1_img4.tif	(x=1494.80 y=220.28)	1	1	298.59375	29.001877	4.118176
b340	0	Fperrara_SingleCell_Microscopy	fp_hcp1_img4.tif	(x=1499.64 y=772.43)	1	1	234.3125	19.345453	5.083905
b342	0	Fperrara_SingleCell_Microscopy	fp_hcp1_img4.tif	(x=1519.18 y=1572.63)	1	1	465.125	29.899303	6.6157584
b345	0	Fperrara_SingleCell_Microscopy	fp_hcp1_img4.tif	(x=1570.83 y=1670.59)	1	1	237.375	17.481062	6.7670774
b347	0	Fperrara_SingleCell_Microscopy	fp_hcp1_img4.tif	(x=1619.25 y=2015.13)	1	1	1099.375	47.396267	4.91402
b351	0	Fperrara_SingleCell_Microscopy	fp_hcp1_img4.tif	(x=1652.95 y=1653.80)	1	1	182.875	16.000763	6.1028605
b353	0	Fperrara_SingleCell_Microscopy	fp_hcp1_img4.tif	(x=1663.99 y=1536.71)	1	1	415.375	30.547138	6.533996
b354	0	Fperrara_SingleCell_Microscopy	fp_hcp1_img4.tif	(x=1663.03 y=1765.10)	1	1	439.75	29.411283	4.585606
b356	0	Fperrara_SingleCell_Microscopy	fp_hcp1_img4.tif	(x=1672.47 y=26.46)	1	1	555.875	36.463383	5.4295597
b357	0	Fperrara_SingleCell_Microscopy	fp_hcp1_img4.tif	(x=1686.63 y=1687.19)	1	1	1076.875	42.18504	6.702312
b360	0	Fperrara_SingleCell_Microscopy	fp_hcp1_img4.tif	(x=1717.29 y=1438.06)	1	1	455.125	35.4641	6.1349063
b367	0	Fperrara_SingleCell_Microscopy	fp_hcp1_img4.tif	(x=1826.53 y=378.02)	1	1	302.875	21.303377	5.3243117
b380	0	Fperrara_SingleCell_Microscopy	fp_hcp1_img4.tif	(x=1883.93 y=1627.59)	1	1	1277.25	53.287796	6.8731966
b382	0	Fperrara_SingleCell_Microscopy	fp_hcp1_img4.tif	(x=1886.05 y=561.00)	1	1	258.0625	19.298958	4.699324
b389	0	Fperrara_SingleCell_Microscopy	fp_hcp1_img4.tif	(x=1973.63 y=1087.66)	1	1	201.25	19.639103	4.0093746
b399	0	Fperrara_SingleCell_Microscopy	fp_hcp1_img4.tif	(x=94.63 y=1709.69)	1	1	182.39844	17.723293	5.950297
b400	0	Fperrara_SingleCell_Microscopy	fp_hcp1_img4.tif	(x=106.48 y=1697.38)	1	1	333.48438	31.485338	5.898142
b434	0	Fperrara_SingleCell_Microscopy	fp_hcp1_img4.tif	(x=1780.92 y=489.29)	1	1	1783.8125	62.522274	6.3520107
b436	0	Fperrara_SingleCell_Microscopy	fp_hcp1_img4.tif	(x=1837.49 y=481.34)	1	1	670.375	38.54622	5.758402
b11	0	Fperrara_SingleCell_Microscopy	fp_hcp1_img5.tif	(x=25.83 y=1863.86)	1	1	432.13574	36.66881	4.0116305
b17	0	Fperrara_SingleCell_Microscopy	fp_hcp1_img5.tif	(x=38.80 y=20.90)	1	1	357.88602	30.789387	4.497762
b33	0	Fperrara_SingleCell_Microscopy	fp_hcp1_img5.tif	(x=105.47 y=1976.12)	1	1	1993.6562	82.91514	6.2767
b34	0	Fperrara_SingleCell_Microscopy	fp_hcp1_img5.tif	(x=93.53 y=164.20)	1	1	470.36816	42.14952	4.2609286
b75	0	Fperrara_SingleCell_Microscopy	fp_hcp1_img5.tif	(x=215.93 y=1626.67)	1	1	364.8125	26.299526	6.0251007
b76	0	Fperrara_SingleCell_Microscopy	fp_hcp1_img5.tif	(x=232.35 y=74.00)	1	1	442.7417	32.524883	5.46024
b77	0	Fperrara_SingleCell_Microscopy	fp_hcp1_img5.tif	(x=232.74 y=1289.11)	1	1	305.46875	29.732073	4.0288754
b83	0	Fperrara_SingleCell_Microscopy	fp_hcp1_img5.tif	(x=246.66 y=296.24)	1	1	450.14844	30.13968	7.117629
b86	0	Fperrara_SingleCell_Microscopy	fp_hcp1_img5.tif	(x=266.08 y=1640.10)	1	1	81.078125	11.378239	4.42584
b92	0	Fperrara_SingleCell_Microscopy	fp_hcp1_img5.tif	(x=287.74 y=584.99)	1	1	241.28125	20.664799	5.130832
b133	0	Fperrara_SingleCell_Microscopy	fp_hcp1_img5.tif	(x=405.23 y=168.10)	1	1	973.916	59.935738	4.2151794
b135	0	Fperrara_SingleCell_Microscopy	fp_hcp1_img5.tif	(x=425.13 y=1730.24)	1	1	372.375	31.913769	4.0241137
b137	0	Fperrara_SingleCell_Microscopy	fp_hcp1_img5.tif	(x=428.72 y=1473.50)	1	1	625.78125	27.286745	4.7542953
b140	0	Fperrara_SingleCell_Microscopy	fp_hcp1_img5.tif	(x=434.24 y=237.62)	1	1	264.16406	24.19319	5.412327
b146	0	Fperrara_SingleCell_Microscopy	fp_hcp1_img5.tif	(x=457.58 y=363.35)	1	1	2328.6562	93.36027	5.7570686
b154	0	Fperrara_SingleCell_Microscopy	fp_hcp1_img5.tif	(x=480.94 y=123.70)	1	1	453.9375	32.159718	6.6405597
b160	0	Fperrara_SingleCell_Microscopy	fp_hcp1_img5.tif	(x=499.96 y=740.79)	1	1	509.85938	33.47128	7.2817583
b171	0	Fperrara_SingleCell_Microscopy	fp_hcp1_img5.tif	(x=538.43 y=413.92)	1	1	382.89062	24.64108	7.3582544
b173	0	Fperrara_SingleCell_Microscopy	fp_hcp1_img5.tif	(x=539.02 y=909.68)	1	1	329.54688	27.294237	4.6370244
b181	0	Fperrara_SingleCell_Microscopy	fp_hcp1_img5.tif	(x=558.08 y=55.36)	1	1	276.69238	24.735853	4.862139
b188	0	Fperrara_SingleCell_Microscopy	fp_hcp1_img5.tif	(x=595.63 y=960.88)	1	1	475.3125	37.423347	4.0590634
b209	0	Fperrara_SingleCell_Microscopy	fp_hcp1_img5.tif	(x=632.02 y=1708.25)	1	1	504.8125	27.200703	7.1225467
b222	0	Fperrara_SingleCell_Microscopy	fp_hcp1_img5.tif	(x=662.45 y=1237.19)	1	1	391.90625	37.344883	6.133544
b225	0	Fperrara_SingleCell_Microscopy	fp_hcp1_img5.tif	(x=675.98 y=1791.51)	1	1	285.6875	24.51867	4.0170527
b226	0	Fperrara_SingleCell_Microscopy	fp_hcp1_img5.tif	(x=670.48 y=902.05)	1	1	85.28125	11.104985	4.3408484
b233	0	Fperrara_SingleCell_Microscopy	fp_hcp1_img5.tif	(x=705.80 y=1261.42)	1	1	224.0	20.56758	4.488533
b235	0	Fperrara_SingleCell_Microscopy	fp_hcp1_img5.tif	(x=718.78 y=1706.84)	1	1	1063.0625	66.22782	6.6586566
b237	0	Fperrara_SingleCell_Microscopy	fp_hcp1_img5.tif	(x=719.43 y=757.78)	1	1	417.3125	34.032936	4.596408
b246	0	Fperrara_SingleCell_Microscopy	fp_hcp1_img5.tif	(x=735.83 y=1598.85)	1	1	346.5625	29.590815	4.179401
b252	0	Fperrara_SingleCell_Microscopy	fp_hcp1_img5.tif	(x=744.66 y=1549.67)	1	1	332.5	29.091068	4.6280193
b255	0	Fperrara_SingleCell_Microscopy	fp_hcp1_img5.tif	(x=771.70 y=66.16)	1	1	867.6406	48.821785	7.4492593
b256	0	Fperrara_SingleCell_Microscopy	fp_hcp1_img5.tif	(x=757.47 y=1818.56)	1	1	169.0	20.229454	4.0682635
b267	0	Fperrara_SingleCell_Microscopy	fp_hcp1_img5.tif	(x=869.66 y=41.44)	1	1	530.77637	33.86147	5.2886434
b268	0	Fperrara_SingleCell_Microscopy	fp_hcp1_img5.tif	(x=881.20 y=289.70)	1	1	369.5703	25.102856	4.703353
b269	0	Fperrara_SingleCell_Microscopy	fp_hcp1_img5.tif	(x=894.25 y=1212.23)	1	1	215.5625	19.296352	6.6478686
b289	0	Fperrara_SingleCell_Microscopy	fp_hcp1_img5.tif	(x=974.09 y=1244.92)	1	1	363.0625	28.613235	6.7443333
b290	0	Fperrara_SingleCell_Microscopy	fp_hcp1_img5.tif	(x=971.50 y=1794.84)	1	1	352.75	21.971266	6.705224
b294	0	Fperrara_SingleCell_Microscopy	fp_hcp1_img5.tif	(x=975.19 y=1278.18)	1	1	319.375	22.769266	6.568981
b302	0	Fperrara_SingleCell_Microscopy	fp_hcp1_img5.tif	(x=982.31 y=202.45)	1	1	84.35156	10.950668	4.099018
b314	0	Fperrara_SingleCell_Microscopy	fp_hcp1_img5.tif	(x=1005.36 y=1289.55)	1	1	227.25	18.873512	5.387621
b332	0	Fperrara_SingleCell_Microscopy	fp_hcp1_img5.tif	(x=1046.05 y=2000.32)	1	1	286.375	19.408136	4.4068103
b340	0	Fperrara_SingleCell_Microscopy	fp_hcp1_img5.tif	(x=1070.76 y=226.73)	1	1	197.57031	16.281126	5.6585464
b345	0	Fperrara_SingleCell_Microscopy	fp_hcp1_img5.tif	(x=1106.21 y=1048.79)	1	1	767.4375	48.91878	6.585293
b363	0	Fperrara_SingleCell_Microscopy	fp_hcp1_img5.tif	(x=1132.50 y=687.19)	1	1	307.21875	26.439203	4.0689893
b387	0	Fperrara_SingleCell_Microscopy	fp_hcp1_img5.tif	(x=1168.92 y=270.57)	1	1	364.53125	28.157448	4.567827
b401	0	Fperrara_SingleCell_Microscopy	fp_hcp1_img5.tif	(x=1205.36 y=714.40)	1	1	363.9375	32.250134	4.714517
b402	0	Fperrara_SingleCell_Microscopy	fp_hcp1_img5.tif	(x=1204.65 y=1126.85)	1	1	275.5	20.166769	6.260127
b428	0	Fperrara_SingleCell_Microscopy	fp_hcp1_img5.tif	(x=1294.56 y=1021.81)	1	1	467.5	38.63845	6.1906047
b431	0	Fperrara_SingleCell_Microscopy	fp_hcp1_img5.tif	(x=1297.47 y=1388.03)	1	1	276.25	29.029398	4.827539
b442	0	Fperrara_SingleCell_Microscopy	fp_hcp1_img5.tif	(x=1337.33 y=688.47)	1	1	269.46875	22.30168	5.2338257
b448	0	Fperrara_SingleCell_Microscopy	fp_hcp1_img5.tif	(x=1356.94 y=1730.29)	1	1	727.875	36.861397	7.5240006
b453	0	Fperrara_SingleCell_Microscopy	fp_hcp1_img5.tif	(x=1391.49 y=839.05)	1	1	337.5625	25.041853	6.1480217
b456	0	Fperrara_SingleCell_Microscopy	fp_hcp1_img5.tif	(x=1423.89 y=1553.02)	1	1	452.0	36.39421	6.5360093
b461	0	Fperrara_SingleCell_Microscopy	fp_hcp1_img5.tif	(x=1439.21 y=686.35)	1	1	407.4375	26.955345	5.760315
b465	0	Fperrara_SingleCell_Microscopy	fp_hcp1_img5.tif	(x=1469.93 y=1685.51)	1	1	106.375	11.972957	4.247474
b466	0	Fperrara_SingleCell_Microscopy	fp_hcp1_img5.tif	(x=1507.40 y=1608.18)	1	1	679.625	54.80639	4.089278
b467	0	Fperrara_SingleCell_Microscopy	fp_hcp1_img5.tif	(x=1505.48 y=2012.53)	1	1	322.125	27.782303	6.6269526
b468	0	Fperrara_SingleCell_Microscopy	fp_hcp1_img5.tif	(x=1512.46 y=186.53)	1	1	201.07812	17.63741	4.8905497
b469	0	Fperrara_SingleCell_Microscopy	fp_hcp1_img5.tif	(x=1524.78 y=779.93)	1	1	623.5625	39.19899	6.144647
b472	0	Fperrara_SingleCell_Microscopy	fp_hcp1_img5.tif	(x=1548.96 y=289.34)	1	1	894.0781	45.99558	7.235212
b473	0	Fperrara_SingleCell_Microscopy	fp_hcp1_img5.tif	(x=1562.61 y=1568.68)	1	1	311.25	25.275633	6.739928
b474	0	Fperrara_SingleCell_Microscopy	fp_hcp1_img5.tif	(x=1566.18 y=786.28)	1	1	411.25	30.41553	5.2633038
b475	0	Fperrara_SingleCell_Microscopy	fp_hcp1_img5.tif	(x=1575.32 y=596.22)	1	1	520.25	36.678112	4.15485
b478	0	Fperrara_SingleCell_Microscopy	fp_hcp1_img5.tif	(x=1600.36 y=534.93)	1	1	204.40625	18.220736	5.3127832
b482	0	Fperrara_SingleCell_Microscopy	fp_hcp1_img5.tif	(x=1630.61 y=439.34)	1	1	508.03125	36.66577	6.1709867
b485	0	Fperrara_SingleCell_Microscopy	fp_hcp1_img5.tif	(x=1667.05 y=1974.60)	1	1	312.25	22.473797	6.6444798
b492	0	Fperrara_SingleCell_Microscopy	fp_hcp1_img5.tif	(x=1684.42 y=180.65)	1	1	332.17188	21.012135	5.58051
b494	0	Fperrara_SingleCell_Microscopy	fp_hcp1_img5.tif	(x=1693.16 y=1800.05)	1	1	293.5	20.227745	7.016769
b501	0	Fperrara_SingleCell_Microscopy	fp_hcp1_img5.tif	(x=1803.81 y=1130.77)	1	1	231.25	19.954567	4.440108
b521	0	Fperrara_SingleCell_Microscopy	fp_hcp1_img5.tif	(x=1974.34 y=651.11)	1	1	666.125	46.182972	4.143015
b575	0	Fperrara_SingleCell_Microscopy	fp_hcp1_img5.tif	(x=1074.68 y=1452.02)	1	1	275.875	25.867107	5.0216265
b576	0	Fperrara_SingleCell_Microscopy	fp_hcp1_img5.tif	(x=1086.67 y=1468.63)	1	1	252.6875	25.372765	5.0019617
b597	0	Fperrara_SingleCell_Microscopy	fp_hcp1_img5.tif	(x=1586.77 y=30.45)	1	1	402.7578	31.903244	6.174564
b598	0	Fperrara_SingleCell_Microscopy	fp_hcp1_img5.tif	(x=1611.08 y=28.15)	1	1	397.81934	30.832506	5.0214796
b20	0	Fperrara_SingleCell_Microscopy	fp_hcp1_img6.tif	(x=66.64 y=1735.36)	1	1	304.9922	20.478346	5.2004843
b28	0	Fperrara_SingleCell_Microscopy	fp_hcp1_img6.tif	(x=87.50 y=1095.00)	1	1	349.45312	26.952358	5.740257
b29	0	Fperrara_SingleCell_Microscopy	fp_hcp1_img6.tif	(x=100.06 y=701.51)	1	1	497.90625	44.865696	4.600348
b55	0	Fperrara_SingleCell_Microscopy	fp_hcp1_img6.tif	(x=157.51 y=377.94)	1	1	238.3164	18.849752	5.71304
b65	0	Fperrara_SingleCell_Microscopy	fp_hcp1_img6.tif	(x=191.59 y=1284.14)	1	1	414.22656	30.106083	5.6195726
b76	0	Fperrara_SingleCell_Microscopy	fp_hcp1_img6.tif	(x=214.91 y=153.66)	1	1	201.8877	19.600954	4.9620743
b87	0	Fperrara_SingleCell_Microscopy	fp_hcp1_img6.tif	(x=246.33 y=1562.35)	1	1	367.125	22.742949	5.687021
b103	0	Fperrara_SingleCell_Microscopy	fp_hcp1_img6.tif	(x=300.21 y=1813.29)	1	1	1182.1719	75.45528	4.1065736
b108	0	Fperrara_SingleCell_Microscopy	fp_hcp1_img6.tif	(x=290.47 y=1958.01)	1	1	154.84375	14.880305	4.065822
b111	0	Fperrara_SingleCell_Microscopy	fp_hcp1_img6.tif	(x=299.97 y=1563.88)	1	1	319.01562	27.730831	4.0371075
b122	0	Fperrara_SingleCell_Microscopy	fp_hcp1_img6.tif	(x=337.31 y=1770.54)	1	1	469.28125	24.823427	5.7979918
b128	0	Fperrara_SingleCell_Microscopy	fp_hcp1_img6.tif	(x=363.28 y=1288.24)	1	1	1691.9844	60.283325	5.819605
b134	0	Fperrara_SingleCell_Microscopy	fp_hcp1_img6.tif	(x=376.15 y=1015.03)	1	1	360.5625	26.944235	4.78282
b135	0	Fperrara_SingleCell_Microscopy	fp_hcp1_img6.tif	(x=382.90 y=57.13)	1	1	1140.9985	39.135544	7.366726
b138	0	Fperrara_SingleCell_Microscopy	fp_hcp1_img6.tif	(x=410.91 y=296.16)	1	1	707.625	63.075874	4.168371
b148	0	Fperrara_SingleCell_Microscopy	fp_hcp1_img6.tif	(x=418.17 y=1496.95)	1	1	390.75	26.737339	6.16335
b181	0	Fperrara_SingleCell_Microscopy	fp_hcp1_img6.tif	(x=515.04 y=57.41)	1	1	367.83594	30.968895	5.0138173
b182	0	Fperrara_SingleCell_Microscopy	fp_hcp1_img6.tif	(x=514.45 y=602.83)	1	1	230.89062	19.955505	5.84529
b185	0	Fperrara_SingleCell_Microscopy	fp_hcp1_img6.tif	(x=529.50 y=998.36)	1	1	390.29688	30.091507	6.2712193
b192	0	Fperrara_SingleCell_Microscopy	fp_hcp1_img6.tif	(x=566.03 y=368.41)	1	1	522.40625	36.471992	4.2530403
b194	0	Fperrara_SingleCell_Microscopy	fp_hcp1_img6.tif	(x=584.63 y=163.67)	1	1	851.08984	65.71404	4.355629
b213	0	Fperrara_SingleCell_Microscopy	fp_hcp1_img6.tif	(x=623.82 y=456.38)	1	1	253.89062	20.59175	5.874706
b218	0	Fperrara_SingleCell_Microscopy	fp_hcp1_img6.tif	(x=654.23 y=1057.69)	1	1	425.78125	34.76199	5.7878265
b219	0	Fperrara_SingleCell_Microscopy	fp_hcp1_img6.tif	(x=653.71 y=1484.86)	1	1	373.75	28.86512	5.840692
b249	0	Fperrara_SingleCell_Microscopy	fp_hcp1_img6.tif	(x=748.95 y=306.30)	1	1	465.46094	29.32968	5.0670485
b251	0	Fperrara_SingleCell_Microscopy	fp_hcp1_img6.tif	(x=755.05 y=988.93)	1	1	344.40625	31.267576	5.71785
b253	0	Fperrara_SingleCell_Microscopy	fp_hcp1_img6.tif	(x=751.70 y=1334.90)	1	1	384.03125	27.030535	5.9494004
b254	0	Fperrara_SingleCell_Microscopy	fp_hcp1_img6.tif	(x=753.24 y=1033.59)	1	1	350.40625	22.9124	5.96429
b258	0	Fperrara_SingleCell_Microscopy	fp_hcp1_img6.tif	(x=768.15 y=835.57)	1	1	583.90625	33.066753	4.549405
b260	0	Fperrara_SingleCell_Microscopy	fp_hcp1_img6.tif	(x=789.93 y=74.65)	1	1	1124.502	80.82177	6.143785
b265	0	Fperrara_SingleCell_Microscopy	fp_hcp1_img6.tif	(x=814.17 y=1928.28)	1	1	84.5	14.052413	4.2673798
b273	0	Fperrara_SingleCell_Microscopy	fp_hcp1_img6.tif	(x=873.14 y=826.99)	1	1	477.5	36.269855	5.9041634
b275	0	Fperrara_SingleCell_Microscopy	fp_hcp1_img6.tif	(x=880.33 y=971.32)	1	1	628.375	30.006891	6.5272136
b276	0	Fperrara_SingleCell_Microscopy	fp_hcp1_img6.tif	(x=888.94 y=519.92)	1	1	808.7031	55.653664	6.3137813
b288	0	Fperrara_SingleCell_Microscopy	fp_hcp1_img6.tif	(x=917.52 y=1012.58)	1	1	83.40625	13.103551	4.064716
b304	0	Fperrara_SingleCell_Microscopy	fp_hcp1_img6.tif	(x=967.04 y=676.26)	1	1	321.125	23.027327	5.9671206
b307	0	Fperrara_SingleCell_Microscopy	fp_hcp1_img6.tif	(x=975.50 y=830.44)	1	1	504.6875	32.945858	6.5473337
b309	0	Fperrara_SingleCell_Microscopy	fp_hcp1_img6.tif	(x=975.92 y=1548.55)	1	1	252.375	21.10522	4.4652205
b316	0	Fperrara_SingleCell_Microscopy	fp_hcp1_img6.tif	(x=1032.00 y=124.09)	1	1	528.97656	32.50272	4.0559716
b317	0	Fperrara_SingleCell_Microscopy	fp_hcp1_img6.tif	(x=1026.05 y=360.36)	1	1	341.54688	21.826555	6.0781493
b321	0	Fperrara_SingleCell_Microscopy	fp_hcp1_img6.tif	(x=1047.14 y=1373.78)	1	1	412.3125	34.719048	4.060817
b324	0	Fperrara_SingleCell_Microscopy	fp_hcp1_img6.tif	(x=1059.29 y=1022.24)	1	1	254.1875	20.17152	5.8231525
b325	0	Fperrara_SingleCell_Microscopy	fp_hcp1_img6.tif	(x=1070.43 y=589.80)	1	1	376.9375	28.484148	4.248271
b327	0	Fperrara_SingleCell_Microscopy	fp_hcp1_img6.tif	(x=1094.81 y=1688.82)	1	1	452.4375	45.070824	4.960522
b330	0	Fperrara_SingleCell_Microscopy	fp_hcp1_img6.tif	(x=1139.64 y=1029.22)	1	1	450.1875	25.033861	6.655783
b331	0	Fperrara_SingleCell_Microscopy	fp_hcp1_img6.tif	(x=1144.17 y=1189.25)	1	1	367.5625	26.978079	4.027958
b338	0	Fperrara_SingleCell_Microscopy	fp_hcp1_img6.tif	(x=1207.45 y=1460.11)	1	1	859.0	59.18682	6.172218
b342	0	Fperrara_SingleCell_Microscopy	fp_hcp1_img6.tif	(x=1207.58 y=1161.76)	1	1	799.9375	46.40313	5.252208
b351	0	Fperrara_SingleCell_Microscopy	fp_hcp1_img6.tif	(x=1244.54 y=531.43)	1	1	822.53125	38.37062	6.6152744
b355	0	Fperrara_SingleCell_Microscopy	fp_hcp1_img6.tif	(x=1263.56 y=1344.21)	1	1	1521.5	104.41792	5.553761
b358	0	Fperrara_SingleCell_Microscopy	fp_hcp1_img6.tif	(x=1328.47 y=1299.16)	1	1	318.4375	26.239914	5.8326864
b364	0	Fperrara_SingleCell_Microscopy	fp_hcp1_img6.tif	(x=1365.67 y=133.49)	1	1	393.2422	24.866264	5.6849103
b370	0	Fperrara_SingleCell_Microscopy	fp_hcp1_img6.tif	(x=1434.64 y=413.14)	1	1	825.78125	68.48346	4.6785274
b371	0	Fperrara_SingleCell_Microscopy	fp_hcp1_img6.tif	(x=1442.30 y=1647.07)	1	1	944.625	35.21211	5.064898
b373	0	Fperrara_SingleCell_Microscopy	fp_hcp1_img6.tif	(x=1464.41 y=1987.50)	1	1	395.75	31.205769	5.7889895
b375	0	Fperrara_SingleCell_Microscopy	fp_hcp1_img6.tif	(x=1468.80 y=879.24)	1	1	172.5	15.345716	5.1792436
b376	0	Fperrara_SingleCell_Microscopy	fp_hcp1_img6.tif	(x=1472.03 y=1397.84)	1	1	292.875	25.377443	4.144598
b377	0	Fperrara_SingleCell_Microscopy	fp_hcp1_img6.tif	(x=1485.89 y=394.54)	1	1	236.90625	21.109243	4.638185
b379	0	Fperrara_SingleCell_Microscopy	fp_hcp1_img6.tif	(x=1503.63 y=1549.55)	1	1	438.25	34.863567	4.4826975
b395	0	Fperrara_SingleCell_Microscopy	fp_hcp1_img6.tif	(x=1561.43 y=41.94)	1	1	333.65234	24.374836	4.563628
b401	0	Fperrara_SingleCell_Microscopy	fp_hcp1_img6.tif	(x=1595.00 y=64.22)	1	1	351.79688	21.095745	4.7303486
b410	0	Fperrara_SingleCell_Microscopy	fp_hcp1_img6.tif	(x=1615.62 y=1583.27)	1	1	148.625	14.060454	5.221315
b411	0	Fperrara_SingleCell_Microscopy	fp_hcp1_img6.tif	(x=1638.91 y=411.18)	1	1	846.9375	41.196465	5.3610563
b413	0	Fperrara_SingleCell_Microscopy	fp_hcp1_img6.tif	(x=1644.90 y=897.87)	1	1	328.0625	27.034817	4.904492
b418	0	Fperrara_SingleCell_Microscopy	fp_hcp1_img6.tif	(x=1671.94 y=1211.86)	1	1	814.375	54.602097	4.3334494
b419	0	Fperrara_SingleCell_Microscopy	fp_hcp1_img6.tif	(x=1669.91 y=67.43)	1	1	466.6172	33.96398	4.7895565
b423	0	Fperrara_SingleCell_Microscopy	fp_hcp1_img6.tif	(x=1687.36 y=1082.24)	1	1	314.75	27.718952	5.2689924
b431	0	Fperrara_SingleCell_Microscopy	fp_hcp1_img6.tif	(x=1718.77 y=1564.31)	1	1	315.0	27.519659	5.652975
b432	0	Fperrara_SingleCell_Microscopy	fp_hcp1_img6.tif	(x=1733.00 y=142.39)	1	1	554.8594	33.392185	4.183188
b434	0	Fperrara_SingleCell_Microscopy	fp_hcp1_img6.tif	(x=1750.37 y=457.96)	1	1	480.5	29.083008	5.010822
b437	0	Fperrara_SingleCell_Microscopy	fp_hcp1_img6.tif	(x=1750.69 y=1787.68)	1	1	127.875	13.083439	4.829751
b439	0	Fperrara_SingleCell_Microscopy	fp_hcp1_img6.tif	(x=1768.26 y=93.91)	1	1	321.10156	19.90331	4.872316
b441	0	Fperrara_SingleCell_Microscopy	fp_hcp1_img6.tif	(x=1790.56 y=42.17)	1	1	407.47852	33.10817	4.9886274
b442	0	Fperrara_SingleCell_Microscopy	fp_hcp1_img6.tif	(x=1804.64 y=381.11)	1	1	1235.3125	41.869476	5.335945
b443	0	Fperrara_SingleCell_Microscopy	fp_hcp1_img6.tif	(x=1798.90 y=209.68)	1	1	359.71875	25.617012	4.009013
b453	0	Fperrara_SingleCell_Microscopy	fp_hcp1_img6.tif	(x=1847.21 y=1633.82)	1	1	550.875	36.634933	5.5448585
b454	0	Fperrara_SingleCell_Microscopy	fp_hcp1_img6.tif	(x=1859.91 y=191.68)	1	1	427.84375	26.441463	5.1962266
b456	0	Fperrara_SingleCell_Microscopy	fp_hcp1_img6.tif	(x=1876.37 y=2029.03)	1	1	168.75	14.719963	5.123337
b457	0	Fperrara_SingleCell_Microscopy	fp_hcp1_img6.tif	(x=1884.20 y=456.26)	1	1	402.65625	26.235952	4.734504
b460	0	Fperrara_SingleCell_Microscopy	fp_hcp1_img6.tif	(x=1911.99 y=1361.07)	1	1	540.875	37.581467	5.869132
b461	0	Fperrara_SingleCell_Microscopy	fp_hcp1_img6.tif	(x=1913.22 y=302.20)	1	1	568.34375	40.866306	4.4970093
b465	0	Fperrara_SingleCell_Microscopy	fp_hcp1_img6.tif	(x=1943.13 y=821.55)	1	1	422.75	33.34829	4.47964
b466	0	Fperrara_SingleCell_Microscopy	fp_hcp1_img6.tif	(x=1944.99 y=150.83)	1	1	527.0156	29.578302	5.7095003
b467	0	Fperrara_SingleCell_Microscopy	fp_hcp1_img6.tif	(x=1949.08 y=1184.05)	1	1	572.25	35.741894	5.1459894
b472	0	Fperrara_SingleCell_Microscopy	fp_hcp1_img6.tif	(x=1968.57 y=919.38)	1	1	254.25	19.807695	4.943209
b473	0	Fperrara_SingleCell_Microscopy	fp_hcp1_img6.tif	(x=1999.71 y=764.59)	1	1	1384.0625	72.79961	4.6196165
b474	0	Fperrara_SingleCell_Microscopy	fp_hcp1_img6.tif	(x=2006.67 y=1565.39)	1	1	777.375	42.31743	5.99545
b475	0	Fperrara_SingleCell_Microscopy	fp_hcp1_img6.tif	(x=2007.60 y=1429.28)	1	1	290.375	23.588343	5.4320674
b476	0	Fperrara_SingleCell_Microscopy	fp_hcp1_img6.tif	(x=2014.74 y=1183.08)	1	1	322.5	22.564293	5.5628066
b477	0	Fperrara_SingleCell_Microscopy	fp_hcp1_img6.tif	(x=2017.81 y=1763.37)	1	1	177.25	16.073484	4.314274
b485	0	Fperrara_SingleCell_Microscopy	fp_hcp1_img6.tif	(x=75.55 y=555.77)	1	1	234.04102	23.716845	4.161428
b558	0	Fperrara_SingleCell_Microscopy	fp_hcp1_img6.tif	(x=1539.40 y=722.63)	1	1	507.125	35.091236	5.4810724
b10	0	Fperrara_SingleCell_Microscopy	fp_hcp1_img7.tif	(x=26.75 y=1199.46)	1	1	482.65625	32.41836	5.2494416
b23	0	Fperrara_SingleCell_Microscopy	fp_hcp1_img7.tif	(x=50.57 y=1829.14)	1	1	350.32422	27.604292	4.6489425
b26	0	Fperrara_SingleCell_Microscopy	fp_hcp1_img7.tif	(x=52.95 y=1694.96)	1	1	447.5078	34.852333	5.078337
b36	0	Fperrara_SingleCell_Microscopy	fp_hcp1_img7.tif	(x=82.11 y=36.14)	1	1	268.29712	19.420792	5.631386
b46	0	Fperrara_SingleCell_Microscopy	fp_hcp1_img7.tif	(x=111.21 y=918.58)	1	1	447.26953	35.83224	5.584802
b53	0	Fperrara_SingleCell_Microscopy	fp_hcp1_img7.tif	(x=135.36 y=720.97)	1	1	514.5469	48.632004	4.495385
b90	0	Fperrara_SingleCell_Microscopy	fp_hcp1_img7.tif	(x=200.18 y=1057.76)	1	1	359.01562	24.943863	5.5909715
b96	0	Fperrara_SingleCell_Microscopy	fp_hcp1_img7.tif	(x=229.18 y=856.46)	1	1	457.5	23.857512	5.3993955
b97	0	Fperrara_SingleCell_Microscopy	fp_hcp1_img7.tif	(x=233.33 y=19.74)	1	1	452.77417	31.694006	4.081457
b107	0	Fperrara_SingleCell_Microscopy	fp_hcp1_img7.tif	(x=273.87 y=1067.36)	1	1	229.45312	17.060867	4.373341
b123	0	Fperrara_SingleCell_Microscopy	fp_hcp1_img7.tif	(x=378.91 y=1221.91)	1	1	245.26562	17.59331	5.8605113
b138	0	Fperrara_SingleCell_Microscopy	fp_hcp1_img7.tif	(x=448.52 y=572.69)	1	1	257.2422	23.429369	4.9299707
b153	0	Fperrara_SingleCell_Microscopy	fp_hcp1_img7.tif	(x=463.91 y=1852.74)	1	1	444.28125	35.315517	4.0350866
b162	0	Fperrara_SingleCell_Microscopy	fp_hcp1_img7.tif	(x=484.85 y=428.99)	1	1	256.28906	22.699076	5.103766
b163	0	Fperrara_SingleCell_Microscopy	fp_hcp1_img7.tif	(x=495.77 y=1356.33)	1	1	593.40625	35.732803	6.053394
b180	0	Fperrara_SingleCell_Microscopy	fp_hcp1_img7.tif	(x=516.00 y=517.27)	1	1	289.0	20.760693	4.8215876
b181	0	Fperrara_SingleCell_Microscopy	fp_hcp1_img7.tif	(x=529.07 y=872.09)	1	1	615.96875	39.985603	5.1447053
b193	0	Fperrara_SingleCell_Microscopy	fp_hcp1_img7.tif	(x=580.79 y=895.67)	1	1	427.25	32.39357	4.1382256
b203	0	Fperrara_SingleCell_Microscopy	fp_hcp1_img7.tif	(x=601.45 y=1071.78)	1	1	375.15625	30.40278	4.0862026
b207	0	Fperrara_SingleCell_Microscopy	fp_hcp1_img7.tif	(x=612.54 y=300.52)	1	1	925.47656	63.73869	5.263935
b210	0	Fperrara_SingleCell_Microscopy	fp_hcp1_img7.tif	(x=612.00 y=1464.18)	1	1	222.0	19.218473	4.207467
b212	0	Fperrara_SingleCell_Microscopy	fp_hcp1_img7.tif	(x=619.55 y=72.50)	1	1	476.7793	28.678661	5.995403
b214	0	Fperrara_SingleCell_Microscopy	fp_hcp1_img7.tif	(x=626.99 y=1921.95)	1	1	429.625	26.60465	5.833943
b217	0	Fperrara_SingleCell_Microscopy	fp_hcp1_img7.tif	(x=651.10 y=186.47)	1	1	469.01172	31.10515	4.4848084
b243	0	Fperrara_SingleCell_Microscopy	fp_hcp1_img7.tif	(x=701.92 y=402.67)	1	1	546.53125	42.533886	5.437321
b245	0	Fperrara_SingleCell_Microscopy	fp_hcp1_img7.tif	(x=708.68 y=1204.03)	1	1	568.78125	31.679455	4.543249
b260	0	Fperrara_SingleCell_Microscopy	fp_hcp1_img7.tif	(x=726.64 y=1084.96)	1	1	144.96875	16.468924	4.7847443
b297	0	Fperrara_SingleCell_Microscopy	fp_hcp1_img7.tif	(x=794.07 y=1344.09)	1	1	369.4375	28.072699	4.8605194
b301	0	Fperrara_SingleCell_Microscopy	fp_hcp1_img7.tif	(x=813.32 y=43.84)	1	1	408.37402	30.36931	5.0843534
b311	0	Fperrara_SingleCell_Microscopy	fp_hcp1_img7.tif	(x=829.45 y=506.20)	1	1	594.5156	44.973724	5.604055
b322	0	Fperrara_SingleCell_Microscopy	fp_hcp1_img7.tif	(x=873.25 y=1596.12)	1	1	2141.125	71.79368	4.712048
b324	0	Fperrara_SingleCell_Microscopy	fp_hcp1_img7.tif	(x=867.07 y=948.91)	1	1	410.28125	22.702015	4.546874
b335	0	Fperrara_SingleCell_Microscopy	fp_hcp1_img7.tif	(x=889.15 y=576.26)	1	1	649.46875	30.411526	5.484153
b336	0	Fperrara_SingleCell_Microscopy	fp_hcp1_img7.tif	(x=887.59 y=241.79)	1	1	479.2422	43.065147	4.7183733
b358	0	Fperrara_SingleCell_Microscopy	fp_hcp1_img7.tif	(x=942.30 y=1367.25)	1	1	273.1875	24.869635	4.3350897
b360	0	Fperrara_SingleCell_Microscopy	fp_hcp1_img7.tif	(x=950.72 y=700.23)	1	1	370.6875	23.315632	5.8725495
b362	0	Fperrara_SingleCell_Microscopy	fp_hcp1_img7.tif	(x=961.85 y=1191.48)	1	1	412.0625	37.22478	4.521089
b363	0	Fperrara_SingleCell_Microscopy	fp_hcp1_img7.tif	(x=979.97 y=345.89)	1	1	1063.75	76.818825	4.560051
b365	0	Fperrara_SingleCell_Microscopy	fp_hcp1_img7.tif	(x=985.28 y=160.21)	1	1	367.09375	30.0733	4.980252
b371	0	Fperrara_SingleCell_Microscopy	fp_hcp1_img7.tif	(x=1016.64 y=1336.02)	1	1	480.125	30.0607	5.596478
b373	0	Fperrara_SingleCell_Microscopy	fp_hcp1_img7.tif	(x=1019.52 y=546.25)	1	1	299.96875	21.222685	4.1654987
b380	0	Fperrara_SingleCell_Microscopy	fp_hcp1_img7.tif	(x=1040.79 y=1813.86)	1	1	507.8125	38.165176	5.5309286
b388	0	Fperrara_SingleCell_Microscopy	fp_hcp1_img7.tif	(x=1058.47 y=1174.97)	1	1	451.5	29.78802	5.7991066
b389	0	Fperrara_SingleCell_Microscopy	fp_hcp1_img7.tif	(x=1055.90 y=1760.12)	1	1	504.9375	36.0647	5.530703
b392	0	Fperrara_SingleCell_Microscopy	fp_hcp1_img7.tif	(x=1063.11 y=964.44)	1	1	372.125	34.157906	4.9702077
b415	0	Fperrara_SingleCell_Microscopy	fp_hcp1_img7.tif	(x=1166.47 y=874.01)	1	1	613.125	34.05665	4.0997148
b423	0	Fperrara_SingleCell_Microscopy	fp_hcp1_img7.tif	(x=1181.40 y=727.68)	1	1	400.53125	30.730665	5.010725
b425	0	Fperrara_SingleCell_Microscopy	fp_hcp1_img7.tif	(x=1194.66 y=1284.24)	1	1	1229.75	63.179478	5.354971
b428	0	Fperrara_SingleCell_Microscopy	fp_hcp1_img7.tif	(x=1189.09 y=317.56)	1	1	277.34375	20.456926	4.4908485
b429	0	Fperrara_SingleCell_Microscopy	fp_hcp1_img7.tif	(x=1187.06 y=220.34)	1	1	188.53125	16.220623	4.125613
b433	0	Fperrara_SingleCell_Microscopy	fp_hcp1_img7.tif	(x=1196.96 y=1028.49)	1	1	664.0	48.01949	5.469177
b439	0	Fperrara_SingleCell_Microscopy	fp_hcp1_img7.tif	(x=1237.78 y=650.17)	1	1	837.96875	53.007446	4.6720204
b453	0	Fperrara_SingleCell_Microscopy	fp_hcp1_img7.tif	(x=1251.59 y=984.06)	1	1	282.9375	19.588585	5.4610033
b472	0	Fperrara_SingleCell_Microscopy	fp_hcp1_img7.tif	(x=1312.42 y=1612.22)	1	1	209.8125	18.1631	4.448361
b474	0	Fperrara_SingleCell_Microscopy	fp_hcp1_img7.tif	(x=1330.62 y=1231.64)	1	1	310.5625	22.548544	4.7517962
b479	0	Fperrara_SingleCell_Microscopy	fp_hcp1_img7.tif	(x=1345.35 y=861.77)	1	1	190.9375	17.662973	4.4660277
b488	0	Fperrara_SingleCell_Microscopy	fp_hcp1_img7.tif	(x=1393.13 y=1132.59)	1	1	639.75	54.480515	4.863436
b504	0	Fperrara_SingleCell_Microscopy	fp_hcp1_img7.tif	(x=1460.26 y=657.43)	1	1	345.3125	28.439064	4.3158402
b509	0	Fperrara_SingleCell_Microscopy	fp_hcp1_img7.tif	(x=1475.36 y=1776.58)	1	1	835.125	33.404675	6.329587
b510	0	Fperrara_SingleCell_Microscopy	fp_hcp1_img7.tif	(x=1472.24 y=699.80)	1	1	399.0	27.18995	4.6613297
b511	0	Fperrara_SingleCell_Microscopy	fp_hcp1_img7.tif	(x=1479.95 y=1286.07)	1	1	352.0	21.714836	5.3931365
b521	0	Fperrara_SingleCell_Microscopy	fp_hcp1_img7.tif	(x=1524.56 y=1108.90)	1	1	632.75	56.866722	4.0128784
b524	0	Fperrara_SingleCell_Microscopy	fp_hcp1_img7.tif	(x=1516.95 y=1969.80)	1	1	337.0	28.294691	5.1533422
b526	0	Fperrara_SingleCell_Microscopy	fp_hcp1_img7.tif	(x=1522.86 y=1896.21)	1	1	304.875	22.947058	4.195608
b543	0	Fperrara_SingleCell_Microscopy	fp_hcp1_img7.tif	(x=1543.81 y=1714.40)	1	1	276.875	25.112505	5.276401
b546	0	Fperrara_SingleCell_Microscopy	fp_hcp1_img7.tif	(x=1550.46 y=627.06)	1	1	377.625	25.109938	4.7815003
b586	0	Fperrara_SingleCell_Microscopy	fp_hcp1_img7.tif	(x=1634.01 y=1634.26)	1	1	536.125	26.258451	5.7486196
b592	0	Fperrara_SingleCell_Microscopy	fp_hcp1_img7.tif	(x=1655.17 y=1777.79)	1	1	178.375	16.908068	4.879706
b597	0	Fperrara_SingleCell_Microscopy	fp_hcp1_img7.tif	(x=1710.36 y=1196.01)	1	1	359.25	21.751453	5.088844
b598	0	Fperrara_SingleCell_Microscopy	fp_hcp1_img7.tif	(x=1711.24 y=166.60)	1	1	311.29688	20.880457	4.5860634
b599	0	Fperrara_SingleCell_Microscopy	fp_hcp1_img7.tif	(x=1721.98 y=1601.15)	1	1	1093.375	60.714302	5.487646
b600	0	Fperrara_SingleCell_Microscopy	fp_hcp1_img7.tif	(x=1722.41 y=1891.72)	1	1	1097.0	49.800594	4.1669025
b607	0	Fperrara_SingleCell_Microscopy	fp_hcp1_img7.tif	(x=1774.25 y=1985.54)	1	1	353.875	24.041224	5.389874
b629	0	Fperrara_SingleCell_Microscopy	fp_hcp1_img7.tif	(x=1879.89 y=1404.07)	1	1	292.0	21.763699	5.0412264
b630	0	Fperrara_SingleCell_Microscopy	fp_hcp1_img7.tif	(x=1884.14 y=2022.69)	1	1	245.25	19.331333	5.2109623
b636	0	Fperrara_SingleCell_Microscopy	fp_hcp1_img7.tif	(x=1921.58 y=1351.36)	1	1	278.0	20.49249	4.748017
b638	0	Fperrara_SingleCell_Microscopy	fp_hcp1_img7.tif	(x=1927.80 y=496.80)	1	1	385.75	22.258831	4.4124794
b641	0	Fperrara_SingleCell_Microscopy	fp_hcp1_img7.tif	(x=1939.83 y=1774.11)	1	1	410.125	33.605064	5.24422
b642	0	Fperrara_SingleCell_Microscopy	fp_hcp1_img7.tif	(x=1950.17 y=584.01)	1	1	369.3125	26.511154	4.722842
b643	0	Fperrara_SingleCell_Microscopy	fp_hcp1_img7.tif	(x=1951.71 y=1652.00)	1	1	297.75	19.84986	4.6740923
b649	0	Fperrara_SingleCell_Microscopy	fp_hcp1_img7.tif	(x=1981.71 y=382.18)	1	1	585.9375	31.269735	5.369465
b653	0	Fperrara_SingleCell_Microscopy	fp_hcp1_img7.tif	(x=1999.57 y=1197.08)	1	1	638.75	32.152298	5.0007463
b655	0	Fperrara_SingleCell_Microscopy	fp_hcp1_img7.tif	(x=2017.32 y=716.77)	1	1	1430.0	45.01231	5.126351
b723	0	Fperrara_SingleCell_Microscopy	fp_hcp1_img7.tif	(x=662.75 y=2038.01)	1	1	264.5625	23.48355	4.408058
b4	0	Fperrara_SingleCell_Microscopy	fp_hcp2_img1.tif	(x=31.27 y=741.44)	1	1	351.7666	29.93507	6.2210317
b5	0	Fperrara_SingleCell_Microscopy	fp_hcp2_img1.tif	(x=40.47 y=894.48)	1	1	411.90137	34.05471	4.4576545
b6	0	Fperrara_SingleCell_Microscopy	fp_hcp2_img1.tif	(x=34.23 y=1145.57)	1	1	272.1953	20.08435	6.699371
b12	0	Fperrara_SingleCell_Microscopy	fp_hcp2_img1.tif	(x=48.85 y=1933.05)	1	1	348.83984	26.705498	4.617889
b26	0	Fperrara_SingleCell_Microscopy	fp_hcp2_img1.tif	(x=63.76 y=141.46)	1	1	369.79175	27.746063	6.646327
b42	0	Fperrara_SingleCell_Microscopy	fp_hcp2_img1.tif	(x=111.01 y=1653.73)	1	1	646.7344	57.347233	6.2813845
b44	0	Fperrara_SingleCell_Microscopy	fp_hcp2_img1.tif	(x=106.74 y=1920.20)	1	1	350.42188	28.285282	6.5891714
b50	0	Fperrara_SingleCell_Microscopy	fp_hcp2_img1.tif	(x=138.88 y=1709.11)	1	1	364.20312	27.981174	6.558396
b59	0	Fperrara_SingleCell_Microscopy	fp_hcp2_img1.tif	(x=153.80 y=393.91)	1	1	552.0332	47.064884	5.9859385
b63	0	Fperrara_SingleCell_Microscopy	fp_hcp2_img1.tif	(x=163.13 y=1990.59)	1	1	229.625	18.390804	6.3752446
b66	0	Fperrara_SingleCell_Microscopy	fp_hcp2_img1.tif	(x=185.91 y=122.29)	1	1	443.62402	36.410553	4.505413
b67	0	Fperrara_SingleCell_Microscopy	fp_hcp2_img1.tif	(x=184.46 y=653.90)	1	1	247.47656	20.310667	4.96536
b71	0	Fperrara_SingleCell_Microscopy	fp_hcp2_img1.tif	(x=208.90 y=984.90)	1	1	418.20312	26.979862	5.536462
b72	0	Fperrara_SingleCell_Microscopy	fp_hcp2_img1.tif	(x=206.57 y=1476.49)	1	1	230.0625	18.994404	4.425499
b76	0	Fperrara_SingleCell_Microscopy	fp_hcp2_img1.tif	(x=231.77 y=1089.80)	1	1	330.1172	21.647615	7.24639
b80	0	Fperrara_SingleCell_Microscopy	fp_hcp2_img1.tif	(x=273.32 y=770.36)	1	1	480.35156	49.356937	4.8506823
b103	0	Fperrara_SingleCell_Microscopy	fp_hcp2_img1.tif	(x=345.92 y=630.02)	1	1	558.7344	32.567352	6.365978
b108	0	Fperrara_SingleCell_Microscopy	fp_hcp2_img1.tif	(x=348.40 y=792.09)	1	1	221.375	18.337559	6.6941504
b118	0	Fperrara_SingleCell_Microscopy	fp_hcp2_img1.tif	(x=385.50 y=1635.50)	1	1	376.6875	23.307331	4.0152454
b124	0	Fperrara_SingleCell_Microscopy	fp_hcp2_img1.tif	(x=408.82 y=281.76)	1	1	268.78516	20.65365	6.285054
b130	0	Fperrara_SingleCell_Microscopy	fp_hcp2_img1.tif	(x=436.35 y=177.13)	1	1	251.95703	20.308165	6.4406314
b133	0	Fperrara_SingleCell_Microscopy	fp_hcp2_img1.tif	(x=445.63 y=372.29)	1	1	334.6172	26.035557	4.9925303
b135	0	Fperrara_SingleCell_Microscopy	fp_hcp2_img1.tif	(x=448.22 y=1902.99)	1	1	267.28125	21.992434	6.2363405
b144	0	Fperrara_SingleCell_Microscopy	fp_hcp2_img1.tif	(x=478.81 y=1736.94)	1	1	366.21875	22.748617	6.6174445
b146	0	Fperrara_SingleCell_Microscopy	fp_hcp2_img1.tif	(x=501.90 y=601.95)	1	1	769.84375	56.58431	7.076509
b153	0	Fperrara_SingleCell_Microscopy	fp_hcp2_img1.tif	(x=497.68 y=900.24)	1	1	320.8125	26.914862	5.2557874
b154	0	Fperrara_SingleCell_Microscopy	fp_hcp2_img1.tif	(x=499.78 y=1085.01)	1	1	273.34375	22.247385	6.625593
b170	0	Fperrara_SingleCell_Microscopy	fp_hcp2_img1.tif	(x=530.97 y=1809.77)	1	1	288.96875	24.278913	4.308092
b180	0	Fperrara_SingleCell_Microscopy	fp_hcp2_img1.tif	(x=543.42 y=444.91)	1	1	286.14062	20.544394	4.5108123
b207	0	Fperrara_SingleCell_Microscopy	fp_hcp2_img1.tif	(x=620.50 y=2027.94)	1	1	225.25	18.019875	6.20322
b209	0	Fperrara_SingleCell_Microscopy	fp_hcp2_img1.tif	(x=627.91 y=1679.85)	1	1	355.75	22.58611	6.6621323
b217	0	Fperrara_SingleCell_Microscopy	fp_hcp2_img1.tif	(x=650.59 y=638.84)	1	1	578.375	27.723919	6.992732
b225	0	Fperrara_SingleCell_Microscopy	fp_hcp2_img1.tif	(x=659.01 y=487.58)	1	1	304.25	27.156847	5.3142986
b230	0	Fperrara_SingleCell_Microscopy	fp_hcp2_img1.tif	(x=667.61 y=78.65)	1	1	449.5547	27.625996	7.4948964
b233	0	Fperrara_SingleCell_Microscopy	fp_hcp2_img1.tif	(x=683.34 y=1836.38)	1	1	320.75	23.000843	6.773901
b237	0	Fperrara_SingleCell_Microscopy	fp_hcp2_img1.tif	(x=701.20 y=439.05)	1	1	320.4375	30.066704	4.145561
b250	0	Fperrara_SingleCell_Microscopy	fp_hcp2_img1.tif	(x=745.86 y=607.51)	1	1	210.82812	16.869385	5.346127
b262	0	Fperrara_SingleCell_Microscopy	fp_hcp2_img1.tif	(x=769.10 y=273.11)	1	1	1693.3906	69.2681	5.5986614
b277	0	Fperrara_SingleCell_Microscopy	fp_hcp2_img1.tif	(x=787.06 y=966.80)	1	1	298.59375	23.60899	6.750382
b278	0	Fperrara_SingleCell_Microscopy	fp_hcp2_img1.tif	(x=793.22 y=1019.23)	1	1	568.5625	39.09818	6.6162434
b294	0	Fperrara_SingleCell_Microscopy	fp_hcp2_img1.tif	(x=840.30 y=696.16)	1	1	277.75	21.125492	5.389336
b298	0	Fperrara_SingleCell_Microscopy	fp_hcp2_img1.tif	(x=869.27 y=486.47)	1	1	865.875	51.80453	4.866708
b299	0	Fperrara_SingleCell_Microscopy	fp_hcp2_img1.tif	(x=857.68 y=532.60)	1	1	161.54688	14.431311	6.053082
b302	0	Fperrara_SingleCell_Microscopy	fp_hcp2_img1.tif	(x=891.84 y=1173.11)	1	1	1065.7812	77.762276	6.553058
b307	0	Fperrara_SingleCell_Microscopy	fp_hcp2_img1.tif	(x=884.57 y=1011.87)	1	1	229.875	18.573177	6.8828673
b316	0	Fperrara_SingleCell_Microscopy	fp_hcp2_img1.tif	(x=908.88 y=1311.87)	1	1	632.4375	32.02708	7.109643
b317	0	Fperrara_SingleCell_Microscopy	fp_hcp2_img1.tif	(x=906.42 y=1462.17)	1	1	210.6875	17.503674	4.3002224
b323	0	Fperrara_SingleCell_Microscopy	fp_hcp2_img1.tif	(x=925.98 y=1661.57)	1	1	228.4375	19.98452	6.509456
b324	0	Fperrara_SingleCell_Microscopy	fp_hcp2_img1.tif	(x=931.28 y=1226.49)	1	1	315.75	25.320318	6.7812214
b338	0	Fperrara_SingleCell_Microscopy	fp_hcp2_img1.tif	(x=965.86 y=1841.59)	1	1	282.8125	22.835394	6.4209094
b340	0	Fperrara_SingleCell_Microscopy	fp_hcp2_img1.tif	(x=971.11 y=237.96)	1	1	540.91406	26.318882	6.845321
b344	0	Fperrara_SingleCell_Microscopy	fp_hcp2_img1.tif	(x=984.20 y=2011.00)	1	1	228.4375	18.081606	6.271346
b351	0	Fperrara_SingleCell_Microscopy	fp_hcp2_img1.tif	(x=1041.41 y=1792.45)	1	1	324.0	21.03336	6.2441435
b352	0	Fperrara_SingleCell_Microscopy	fp_hcp2_img1.tif	(x=1046.41 y=763.45)	1	1	281.75	22.843275	4.8242383
b360	0	Fperrara_SingleCell_Microscopy	fp_hcp2_img1.tif	(x=1063.90 y=804.27)	1	1	148.9375	16.134089	5.7096815
b361	0	Fperrara_SingleCell_Microscopy	fp_hcp2_img1.tif	(x=1069.35 y=81.82)	1	1	298.64453	25.23995	5.9096823
b366	0	Fperrara_SingleCell_Microscopy	fp_hcp2_img1.tif	(x=1085.27 y=378.85)	1	1	712.0625	40.838284	7.452432
b370	0	Fperrara_SingleCell_Microscopy	fp_hcp2_img1.tif	(x=1112.09 y=1374.37)	1	1	265.375	23.05785	4.017656
b374	0	Fperrara_SingleCell_Microscopy	fp_hcp2_img1.tif	(x=1137.19 y=668.17)	1	1	421.21875	29.77511	6.931438
b378	0	Fperrara_SingleCell_Microscopy	fp_hcp2_img1.tif	(x=1166.16 y=1595.38)	1	1	194.9375	18.404577	4.5512495
b380	0	Fperrara_SingleCell_Microscopy	fp_hcp2_img1.tif	(x=1167.32 y=1258.38)	1	1	187.5	15.6108885	6.313383
b391	0	Fperrara_SingleCell_Microscopy	fp_hcp2_img1.tif	(x=1189.49 y=950.34)	1	1	650.6875	40.974205	4.6072636
b396	0	Fperrara_SingleCell_Microscopy	fp_hcp2_img1.tif	(x=1197.30 y=1154.62)	1	1	404.75	38.37296	4.0018773
b397	0	Fperrara_SingleCell_Microscopy	fp_hcp2_img1.tif	(x=1205.91 y=1259.49)	1	1	350.6875	29.59303	5.482729
b399	0	Fperrara_SingleCell_Microscopy	fp_hcp2_img1.tif	(x=1208.64 y=272.79)	1	1	241.5	19.096376	6.4425673
b400	0	Fperrara_SingleCell_Microscopy	fp_hcp2_img1.tif	(x=1209.40 y=507.33)	1	1	334.4375	24.297123	4.3504167
b402	0	Fperrara_SingleCell_Microscopy	fp_hcp2_img1.tif	(x=1213.22 y=1116.90)	1	1	230.3125	19.66831	6.071877
b407	0	Fperrara_SingleCell_Microscopy	fp_hcp2_img1.tif	(x=1255.66 y=1972.36)	1	1	670.5	30.373516	4.677207
b411	0	Fperrara_SingleCell_Microscopy	fp_hcp2_img1.tif	(x=1272.45 y=251.48)	1	1	259.98438	21.337194	6.4685936
b413	0	Fperrara_SingleCell_Microscopy	fp_hcp2_img1.tif	(x=1292.69 y=220.89)	1	1	325.65625	31.027245	4.4068794
b430	0	Fperrara_SingleCell_Microscopy	fp_hcp2_img1.tif	(x=1367.60 y=1069.90)	1	1	92.3125	10.434463	4.656924
b440	0	Fperrara_SingleCell_Microscopy	fp_hcp2_img1.tif	(x=1399.13 y=1156.06)	1	1	718.3125	44.59105	7.023273
b441	0	Fperrara_SingleCell_Microscopy	fp_hcp2_img1.tif	(x=1410.97 y=785.93)	1	1	335.5	26.217028	6.5548496
b442	0	Fperrara_SingleCell_Microscopy	fp_hcp2_img1.tif	(x=1417.46 y=819.47)	1	1	181.25	16.045687	6.1322217
b445	0	Fperrara_SingleCell_Microscopy	fp_hcp2_img1.tif	(x=1449.98 y=1922.44)	1	1	416.25	34.86702	5.6038046
b448	0	Fperrara_SingleCell_Microscopy	fp_hcp2_img1.tif	(x=1477.41 y=1521.41)	1	1	374.5	30.301083	6.5259233
b452	0	Fperrara_SingleCell_Microscopy	fp_hcp2_img1.tif	(x=1504.04 y=158.60)	1	1	405.59375	30.231197	6.1760473
b453	0	Fperrara_SingleCell_Microscopy	fp_hcp2_img1.tif	(x=1532.02 y=1745.91)	1	1	478.75	40.397953	6.0117955
b454	0	Fperrara_SingleCell_Microscopy	fp_hcp2_img1.tif	(x=1528.36 y=1403.53)	1	1	176.75	16.161364	4.0703506
b455	0	Fperrara_SingleCell_Microscopy	fp_hcp2_img1.tif	(x=1544.35 y=1973.74)	1	1	421.125	33.815407	6.392767
b457	0	Fperrara_SingleCell_Microscopy	fp_hcp2_img1.tif	(x=1563.89 y=1654.28)	1	1	240.25	18.091673	6.2874446
b460	0	Fperrara_SingleCell_Microscopy	fp_hcp2_img1.tif	(x=1585.50 y=682.59)	1	1	202.3125	18.177307	5.9733725
b468	0	Fperrara_SingleCell_Microscopy	fp_hcp2_img1.tif	(x=1618.51 y=474.59)	1	1	279.78125	24.09691	6.0332084
b471	0	Fperrara_SingleCell_Microscopy	fp_hcp2_img1.tif	(x=1639.44 y=305.27)	1	1	179.89062	16.09154	5.538727
b483	0	Fperrara_SingleCell_Microscopy	fp_hcp2_img1.tif	(x=1676.60 y=1533.75)	1	1	194.5	18.262045	6.0476108
b499	0	Fperrara_SingleCell_Microscopy	fp_hcp2_img1.tif	(x=1766.42 y=348.73)	1	1	786.28125	39.35648	6.903371
b500	0	Fperrara_SingleCell_Microscopy	fp_hcp2_img1.tif	(x=1775.52 y=1878.13)	1	1	389.625	32.141926	4.6042733
b504	0	Fperrara_SingleCell_Microscopy	fp_hcp2_img1.tif	(x=1784.01 y=904.34)	1	1	442.5625	40.61586	4.004241
b512	0	Fperrara_SingleCell_Microscopy	fp_hcp2_img1.tif	(x=1851.65 y=431.80)	1	1	237.71875	18.225727	6.2405553
b517	0	Fperrara_SingleCell_Microscopy	fp_hcp2_img1.tif	(x=1878.81 y=1934.99)	1	1	293.375	22.862356	6.54022
b520	0	Fperrara_SingleCell_Microscopy	fp_hcp2_img1.tif	(x=1897.24 y=857.96)	1	1	275.25	24.678062	6.326176
b524	0	Fperrara_SingleCell_Microscopy	fp_hcp2_img1.tif	(x=1930.90 y=985.78)	1	1	312.0625	24.628899	4.707856
b528	0	Fperrara_SingleCell_Microscopy	fp_hcp2_img1.tif	(x=1943.89 y=1084.90)	1	1	437.625	45.6642	5.4035153
b530	0	Fperrara_SingleCell_Microscopy	fp_hcp2_img1.tif	(x=1959.73 y=436.74)	1	1	438.625	24.376144	4.055967
b556	0	Fperrara_SingleCell_Microscopy	fp_hcp2_img1.tif	(x=150.91 y=1855.75)	1	1	144.89062	15.069734	5.4976397
b557	0	Fperrara_SingleCell_Microscopy	fp_hcp2_img1.tif	(x=159.64 y=1835.64)	1	1	448.60938	41.008736	4.03172
b558	0	Fperrara_SingleCell_Microscopy	fp_hcp2_img1.tif	(x=162.65 y=1863.73)	1	1	176.85938	16.259577	5.46086
b43	0	Fperrara_SingleCell_Microscopy	fp_hcp2_img2.tif	(x=77.11 y=1232.52)	1	1	324.53906	27.435743	5.8979163
b62	0	Fperrara_SingleCell_Microscopy	fp_hcp2_img2.tif	(x=103.55 y=1771.65)	1	1	401.3047	30.577198	5.8962975
b81	0	Fperrara_SingleCell_Microscopy	fp_hcp2_img2.tif	(x=149.45 y=1158.11)	1	1	375.3203	29.509033	6.3937397
b100	0	Fperrara_SingleCell_Microscopy	fp_hcp2_img2.tif	(x=196.50 y=1897.64)	1	1	986.15625	48.620087	5.8767195
b107	0	Fperrara_SingleCell_Microscopy	fp_hcp2_img2.tif	(x=206.33 y=1647.65)	1	1	543.78125	37.69449	5.978765
b110	0	Fperrara_SingleCell_Microscopy	fp_hcp2_img2.tif	(x=208.09 y=720.94)	1	1	334.4297	22.836077	6.8419642
b126	0	Fperrara_SingleCell_Microscopy	fp_hcp2_img2.tif	(x=235.97 y=1177.40)	1	1	300.96875	23.704506	4.033411
b136	0	Fperrara_SingleCell_Microscopy	fp_hcp2_img2.tif	(x=250.10 y=1950.09)	1	1	667.84375	33.72787	4.2816978
b143	0	Fperrara_SingleCell_Microscopy	fp_hcp2_img2.tif	(x=252.54 y=1564.91)	1	1	196.07812	19.290176	4.161638
b187	0	Fperrara_SingleCell_Microscopy	fp_hcp2_img2.tif	(x=354.21 y=1332.93)	1	1	546.78125	30.0868	6.702324
b193	0	Fperrara_SingleCell_Microscopy	fp_hcp2_img2.tif	(x=372.03 y=599.70)	1	1	702.35156	50.34914	6.429199
b199	0	Fperrara_SingleCell_Microscopy	fp_hcp2_img2.tif	(x=366.34 y=2011.24)	1	1	469.6875	27.859703	6.2746596
b206	0	Fperrara_SingleCell_Microscopy	fp_hcp2_img2.tif	(x=404.86 y=1890.39)	1	1	707.53125	61.367622	4.1811366
b214	0	Fperrara_SingleCell_Microscopy	fp_hcp2_img2.tif	(x=425.50 y=1142.31)	1	1	763.2969	36.56694	4.9007025
b215	0	Fperrara_SingleCell_Microscopy	fp_hcp2_img2.tif	(x=425.89 y=91.67)	1	1	638.48047	40.53829	6.7964773
b220	0	Fperrara_SingleCell_Microscopy	fp_hcp2_img2.tif	(x=424.48 y=293.05)	1	1	411.95703	33.63039	6.509292
b255	0	Fperrara_SingleCell_Microscopy	fp_hcp2_img2.tif	(x=481.47 y=660.05)	1	1	514.34375	32.887447	6.623666
b262	0	Fperrara_SingleCell_Microscopy	fp_hcp2_img2.tif	(x=495.31 y=616.76)	1	1	336.75	25.928333	5.8989563
b286	0	Fperrara_SingleCell_Microscopy	fp_hcp2_img2.tif	(x=535.08 y=914.11)	1	1	299.07812	23.853308	4.536399
b340	0	Fperrara_SingleCell_Microscopy	fp_hcp2_img2.tif	(x=628.70 y=82.51)	1	1	482.72656	34.350483	7.0776105
b358	0	Fperrara_SingleCell_Microscopy	fp_hcp2_img2.tif	(x=674.06 y=116.21)	1	1	618.4297	32.774937	4.2349033
b389	0	Fperrara_SingleCell_Microscopy	fp_hcp2_img2.tif	(x=725.02 y=1791.04)	1	1	198.6875	16.709316	4.1916575
b394	0	Fperrara_SingleCell_Microscopy	fp_hcp2_img2.tif	(x=725.34 y=1737.75)	1	1	147.25	16.081186	4.183503
b413	0	Fperrara_SingleCell_Microscopy	fp_hcp2_img2.tif	(x=761.77 y=1751.16)	1	1	143.0625	15.958401	4.177048
b428	0	Fperrara_SingleCell_Microscopy	fp_hcp2_img2.tif	(x=802.13 y=1010.98)	1	1	284.4375	19.857676	6.6328044
b431	0	Fperrara_SingleCell_Microscopy	fp_hcp2_img2.tif	(x=854.38 y=440.70)	1	1	1084.2188	46.687397	6.6824307
b444	0	Fperrara_SingleCell_Microscopy	fp_hcp2_img2.tif	(x=900.03 y=1004.84)	1	1	450.09375	31.864113	4.2125077
b450	0	Fperrara_SingleCell_Microscopy	fp_hcp2_img2.tif	(x=901.32 y=1776.42)	1	1	241.75	18.360971	5.5491185
b459	0	Fperrara_SingleCell_Microscopy	fp_hcp2_img2.tif	(x=926.10 y=279.05)	1	1	425.8047	33.40345	5.1705675
b465	0	Fperrara_SingleCell_Microscopy	fp_hcp2_img2.tif	(x=944.91 y=554.58)	1	1	611.03125	43.406746	5.6456833
b470	0	Fperrara_SingleCell_Microscopy	fp_hcp2_img2.tif	(x=946.20 y=224.08)	1	1	373.39062	29.819878	4.134577
b472	0	Fperrara_SingleCell_Microscopy	fp_hcp2_img2.tif	(x=955.66 y=80.39)	1	1	456.41406	28.136898	7.530284
b483	0	Fperrara_SingleCell_Microscopy	fp_hcp2_img2.tif	(x=993.44 y=1247.92)	1	1	989.1875	71.051926	5.871105
b485	0	Fperrara_SingleCell_Microscopy	fp_hcp2_img2.tif	(x=1000.27 y=1531.48)	1	1	400.625	29.564117	5.8435774
b490	0	Fperrara_SingleCell_Microscopy	fp_hcp2_img2.tif	(x=1031.85 y=1753.54)	1	1	453.3125	38.45134	4.540813
b515	0	Fperrara_SingleCell_Microscopy	fp_hcp2_img2.tif	(x=1091.74 y=1584.83)	1	1	915.625	58.642437	4.6457195
b516	0	Fperrara_SingleCell_Microscopy	fp_hcp2_img2.tif	(x=1080.79 y=1222.28)	1	1	411.125	32.52665	6.2425194
b518	0	Fperrara_SingleCell_Microscopy	fp_hcp2_img2.tif	(x=1090.89 y=1909.26)	1	1	423.5	34.700844	4.5282264
b521	0	Fperrara_SingleCell_Microscopy	fp_hcp2_img2.tif	(x=1088.34 y=470.97)	1	1	237.23438	20.734615	6.323295
b528	0	Fperrara_SingleCell_Microscopy	fp_hcp2_img2.tif	(x=1116.19 y=334.60)	1	1	2497.6406	88.25369	4.7514577
b531	0	Fperrara_SingleCell_Microscopy	fp_hcp2_img2.tif	(x=1094.80 y=410.69)	1	1	328.28125	27.194561	4.5036535
b535	0	Fperrara_SingleCell_Microscopy	fp_hcp2_img2.tif	(x=1104.51 y=627.84)	1	1	331.34375	20.646484	6.0021315
b537	0	Fperrara_SingleCell_Microscopy	fp_hcp2_img2.tif	(x=1107.29 y=1378.65)	1	1	497.1875	27.835125	6.6996827
b544	0	Fperrara_SingleCell_Microscopy	fp_hcp2_img2.tif	(x=1130.59 y=771.18)	1	1	383.5	27.944143	6.5461516
b586	0	Fperrara_SingleCell_Microscopy	fp_hcp2_img2.tif	(x=1227.57 y=282.11)	1	1	332.65625	25.405512	6.874234
b592	0	Fperrara_SingleCell_Microscopy	fp_hcp2_img2.tif	(x=1247.69 y=137.91)	1	1	462.71875	29.194866	6.8598127
b595	0	Fperrara_SingleCell_Microscopy	fp_hcp2_img2.tif	(x=1261.67 y=226.37)	1	1	372.67188	31.543056	4.1970267
b600	0	Fperrara_SingleCell_Microscopy	fp_hcp2_img2.tif	(x=1266.67 y=899.70)	1	1	180.625	19.01531	5.7044454
b604	0	Fperrara_SingleCell_Microscopy	fp_hcp2_img2.tif	(x=1277.73 y=625.38)	1	1	360.96875	28.831783	4.6668887
b611	0	Fperrara_SingleCell_Microscopy	fp_hcp2_img2.tif	(x=1291.10 y=109.24)	1	1	308.2539	22.158628	6.7659063
b612	0	Fperrara_SingleCell_Microscopy	fp_hcp2_img2.tif	(x=1291.93 y=1892.12)	1	1	294.375	20.895365	5.048384
b618	0	Fperrara_SingleCell_Microscopy	fp_hcp2_img2.tif	(x=1306.02 y=471.21)	1	1	207.75	17.586054	4.1287265
b661	0	Fperrara_SingleCell_Microscopy	fp_hcp2_img2.tif	(x=1448.77 y=745.31)	1	1	1290.75	92.539375	5.8004646
b664	0	Fperrara_SingleCell_Microscopy	fp_hcp2_img2.tif	(x=1450.00 y=1889.94)	1	1	290.375	22.713987	5.218884
b670	0	Fperrara_SingleCell_Microscopy	fp_hcp2_img2.tif	(x=1472.19 y=1120.00)	1	1	726.5625	60.074	6.1763554
b680	0	Fperrara_SingleCell_Microscopy	fp_hcp2_img2.tif	(x=1507.29 y=1398.84)	1	1	239.3125	20.06272	5.659651
b683	0	Fperrara_SingleCell_Microscopy	fp_hcp2_img2.tif	(x=1515.11 y=1363.30)	1	1	515.8125	38.728268	4.1545944
b688	0	Fperrara_SingleCell_Microscopy	fp_hcp2_img2.tif	(x=1518.75 y=1232.74)	1	1	811.4375	57.105827	5.8987837
b697	0	Fperrara_SingleCell_Microscopy	fp_hcp2_img2.tif	(x=1553.21 y=1337.47)	1	1	167.8125	15.399545	5.5294037
b709	0	Fperrara_SingleCell_Microscopy	fp_hcp2_img2.tif	(x=1572.90 y=1334.96)	1	1	129.0625	13.041541	5.082041
b717	0	Fperrara_SingleCell_Microscopy	fp_hcp2_img2.tif	(x=1604.75 y=1821.83)	1	1	208.25	17.798983	5.204114
b723	0	Fperrara_SingleCell_Microscopy	fp_hcp2_img2.tif	(x=1633.57 y=1280.95)	1	1	328.4375	21.374323	4.5571237
b727	0	Fperrara_SingleCell_Microscopy	fp_hcp2_img2.tif	(x=1667.32 y=325.16)	1	1	1046.0	54.03951	4.527406
b735	0	Fperrara_SingleCell_Microscopy	fp_hcp2_img2.tif	(x=1675.57 y=1915.19)	1	1	462.875	25.274874	5.601064
b738	0	Fperrara_SingleCell_Microscopy	fp_hcp2_img2.tif	(x=1684.78 y=1081.28)	1	1	404.6875	32.418365	6.2562647
b758	0	Fperrara_SingleCell_Microscopy	fp_hcp2_img2.tif	(x=1755.63 y=1396.09)	1	1	561.125	32.114513	5.343923
b762	0	Fperrara_SingleCell_Microscopy	fp_hcp2_img2.tif	(x=1768.97 y=942.58)	1	1	320.8125	22.092405	6.713162
b765	0	Fperrara_SingleCell_Microscopy	fp_hcp2_img2.tif	(x=1777.36 y=1889.94)	1	1	307.125	23.734467	5.554055
b776	0	Fperrara_SingleCell_Microscopy	fp_hcp2_img2.tif	(x=1791.52 y=192.45)	1	1	281.10938	20.046164	6.666108
b777	0	Fperrara_SingleCell_Microscopy	fp_hcp2_img2.tif	(x=1795.35 y=1087.74)	1	1	282.6875	21.828936	6.1616416
b781	0	Fperrara_SingleCell_Microscopy	fp_hcp2_img2.tif	(x=1797.49 y=920.55)	1	1	102.125	11.905117	4.6376944
b792	0	Fperrara_SingleCell_Microscopy	fp_hcp2_img2.tif	(x=1828.66 y=1321.73)	1	1	352.125	21.792515	5.1395755
b793	0	Fperrara_SingleCell_Microscopy	fp_hcp2_img2.tif	(x=1827.81 y=447.78)	1	1	163.3125	16.32889	4.5620017
b794	0	Fperrara_SingleCell_Microscopy	fp_hcp2_img2.tif	(x=1840.12 y=149.35)	1	1	485.8047	26.935104	6.4721212
b799	0	Fperrara_SingleCell_Microscopy	fp_hcp2_img2.tif	(x=1856.65 y=1792.56)	1	1	338.0	28.170057	5.4885945
b838	0	Fperrara_SingleCell_Microscopy	fp_hcp2_img2.tif	(x=1963.43 y=16.78)	1	1	368.5935	27.634409	6.6969094
b848	0	Fperrara_SingleCell_Microscopy	fp_hcp2_img2.tif	(x=2007.93 y=244.14)	1	1	320.51562	22.18189	6.809248
b849	0	Fperrara_SingleCell_Microscopy	fp_hcp2_img2.tif	(x=2022.18 y=1104.11)	1	1	394.0	25.462927	6.044281
b868	0	Fperrara_SingleCell_Microscopy	fp_hcp2_img2.tif	(x=99.94 y=252.73)	1	1	413.9297	30.85635	5.378756
b943	0	Fperrara_SingleCell_Microscopy	fp_hcp2_img2.tif	(x=1466.62 y=675.08)	1	1	673.03125	31.115889	5.932948
b945	0	Fperrara_SingleCell_Microscopy	fp_hcp2_img2.tif	(x=1477.41 y=694.09)	1	1	219.375	25.460163	5.1882486
b946	0	Fperrara_SingleCell_Microscopy	fp_hcp2_img2.tif	(x=1496.01 y=684.90)	1	1	217.78125	19.126234	5.1040773
b949	0	Fperrara_SingleCell_Microscopy	fp_hcp2_img2.tif	(x=1544.45 y=342.09)	1	1	272.40625	21.483149	6.5256686
b950	0	Fperrara_SingleCell_Microscopy	fp_hcp2_img2.tif	(x=1557.43 y=351.23)	1	1	530.0625	38.497147	6.500151
b1	0	Fperrara_SingleCell_Microscopy	fp_hcp2_img3.tif	(x=17.56 y=1483.68)	1	1	239.2334	19.916573	4.1886888
b12	0	Fperrara_SingleCell_Microscopy	fp_hcp2_img3.tif	(x=48.38 y=298.26)	1	1	370.76416	22.224419	7.1749263
b18	0	Fperrara_SingleCell_Microscopy	fp_hcp2_img3.tif	(x=62.24 y=1444.60)	1	1	574.5137	38.96339	6.3186927
b24	0	Fperrara_SingleCell_Microscopy	fp_hcp2_img3.tif	(x=62.22 y=110.15)	1	1	390.0735	28.29725	5.8215265
b44	0	Fperrara_SingleCell_Microscopy	fp_hcp2_img3.tif	(x=93.13 y=1345.11)	1	1	339.53906	24.02521	6.3471956
b45	0	Fperrara_SingleCell_Microscopy	fp_hcp2_img3.tif	(x=93.80 y=1911.68)	1	1	322.66406	23.819595	4.3327765
b48	0	Fperrara_SingleCell_Microscopy	fp_hcp2_img3.tif	(x=104.48 y=875.56)	1	1	362.6328	21.021658	5.986485
b55	0	Fperrara_SingleCell_Microscopy	fp_hcp2_img3.tif	(x=132.56 y=1157.09)	1	1	226.65625	19.038269	4.0578113
b58	0	Fperrara_SingleCell_Microscopy	fp_hcp2_img3.tif	(x=139.75 y=808.19)	1	1	282.6328	24.58879	4.3082576
b65	0	Fperrara_SingleCell_Microscopy	fp_hcp2_img3.tif	(x=166.25 y=198.17)	1	1	249.33398	19.545355	6.2708783
b66	0	Fperrara_SingleCell_Microscopy	fp_hcp2_img3.tif	(x=167.80 y=2022.70)	1	1	247.67188	21.598883	4.0812626
b72	0	Fperrara_SingleCell_Microscopy	fp_hcp2_img3.tif	(x=196.40 y=1132.96)	1	1	418.21094	31.823315	5.8636317
b79	0	Fperrara_SingleCell_Microscopy	fp_hcp2_img3.tif	(x=221.19 y=925.28)	1	1	915.08594	50.399593	6.409687
b84	0	Fperrara_SingleCell_Microscopy	fp_hcp2_img3.tif	(x=218.91 y=1071.24)	1	1	189.34375	15.689722	5.798625
b86	0	Fperrara_SingleCell_Microscopy	fp_hcp2_img3.tif	(x=234.18 y=217.32)	1	1	266.13672	20.06222	5.81973
b87	0	Fperrara_SingleCell_Microscopy	fp_hcp2_img3.tif	(x=238.01 y=1145.96)	1	1	225.26562	20.389477	5.4285417
b90	0	Fperrara_SingleCell_Microscopy	fp_hcp2_img3.tif	(x=240.80 y=319.46)	1	1	245.51562	20.292398	6.252117
b93	0	Fperrara_SingleCell_Microscopy	fp_hcp2_img3.tif	(x=246.84 y=1315.68)	1	1	449.0625	28.579226	6.684978
b108	0	Fperrara_SingleCell_Microscopy	fp_hcp2_img3.tif	(x=277.80 y=105.98)	1	1	364.20215	28.479939	6.6048355
b111	0	Fperrara_SingleCell_Microscopy	fp_hcp2_img3.tif	(x=279.02 y=1077.55)	1	1	296.42188	22.91792	5.6606636
b119	0	Fperrara_SingleCell_Microscopy	fp_hcp2_img3.tif	(x=301.75 y=1310.16)	1	1	479.07812	35.195263	6.2688136
b122	0	Fperrara_SingleCell_Microscopy	fp_hcp2_img3.tif	(x=298.68 y=1392.45)	1	1	316.9375	23.095497	6.2546716
b123	0	Fperrara_SingleCell_Microscopy	fp_hcp2_img3.tif	(x=302.74 y=562.92)	1	1	442.6172	40.40061	4.878591
b148	0	Fperrara_SingleCell_Microscopy	fp_hcp2_img3.tif	(x=340.17 y=441.67)	1	1	161.69531	14.674195	5.8157167
b155	0	Fperrara_SingleCell_Microscopy	fp_hcp2_img3.tif	(x=360.56 y=1570.51)	1	1	364.59375	24.81963	5.2728953
b163	0	Fperrara_SingleCell_Microscopy	fp_hcp2_img3.tif	(x=368.62 y=1947.18)	1	1	277.34375	20.304445	5.3583965
b171	0	Fperrara_SingleCell_Microscopy	fp_hcp2_img3.tif	(x=377.65 y=1269.10)	1	1	435.67188	27.07118	4.978856
b181	0	Fperrara_SingleCell_Microscopy	fp_hcp2_img3.tif	(x=401.39 y=1445.52)	1	1	480.75	38.642487	6.064724
b187	0	Fperrara_SingleCell_Microscopy	fp_hcp2_img3.tif	(x=399.68 y=1116.88)	1	1	324.53125	25.270216	6.385861
b192	0	Fperrara_SingleCell_Microscopy	fp_hcp2_img3.tif	(x=405.63 y=888.23)	1	1	384.9375	28.47281	6.4870133
b212	0	Fperrara_SingleCell_Microscopy	fp_hcp2_img3.tif	(x=424.00 y=1913.88)	1	1	255.5	19.41265	5.764252
b213	0	Fperrara_SingleCell_Microscopy	fp_hcp2_img3.tif	(x=428.15 y=1333.06)	1	1	287.0	23.404266	5.514816
b223	0	Fperrara_SingleCell_Microscopy	fp_hcp2_img3.tif	(x=441.06 y=532.35)	1	1	223.3125	18.34858	5.95104
b245	0	Fperrara_SingleCell_Microscopy	fp_hcp2_img3.tif	(x=492.77 y=1412.98)	1	1	765.21875	60.881897	5.045913
b255	0	Fperrara_SingleCell_Microscopy	fp_hcp2_img3.tif	(x=501.23 y=989.51)	1	1	298.64062	26.001186	4.274941
b259	0	Fperrara_SingleCell_Microscopy	fp_hcp2_img3.tif	(x=509.32 y=1500.25)	1	1	350.28125	31.176512	4.4450736
b270	0	Fperrara_SingleCell_Microscopy	fp_hcp2_img3.tif	(x=525.96 y=1366.33)	1	1	365.21875	30.015387	6.0477624
b274	0	Fperrara_SingleCell_Microscopy	fp_hcp2_img3.tif	(x=539.80 y=338.76)	1	1	379.8828	29.04877	6.008787
b277	0	Fperrara_SingleCell_Microscopy	fp_hcp2_img3.tif	(x=540.32 y=1905.53)	1	1	210.90625	18.67808	5.1266336
b283	0	Fperrara_SingleCell_Microscopy	fp_hcp2_img3.tif	(x=550.70 y=233.11)	1	1	377.0039	31.681307	6.216589
b286	0	Fperrara_SingleCell_Microscopy	fp_hcp2_img3.tif	(x=565.59 y=1612.01)	1	1	217.03125	29.2154	4.539651
b292	0	Fperrara_SingleCell_Microscopy	fp_hcp2_img3.tif	(x=578.18 y=526.29)	1	1	557.3281	45.113842	5.237897
b306	0	Fperrara_SingleCell_Microscopy	fp_hcp2_img3.tif	(x=592.71 y=1678.34)	1	1	538.375	36.241436	6.1541667
b312	0	Fperrara_SingleCell_Microscopy	fp_hcp2_img3.tif	(x=600.61 y=342.52)	1	1	239.03906	18.361368	6.4927826
b313	0	Fperrara_SingleCell_Microscopy	fp_hcp2_img3.tif	(x=609.46 y=419.49)	1	1	457.15625	39.8066	6.0839777
b320	0	Fperrara_SingleCell_Microscopy	fp_hcp2_img3.tif	(x=624.32 y=1441.69)	1	1	423.125	27.715452	4.5566244
b321	0	Fperrara_SingleCell_Microscopy	fp_hcp2_img3.tif	(x=625.52 y=361.82)	1	1	319.89062	25.59695	6.291544
b325	0	Fperrara_SingleCell_Microscopy	fp_hcp2_img3.tif	(x=635.09 y=830.70)	1	1	291.79688	24.195513	4.5259976
b371	0	Fperrara_SingleCell_Microscopy	fp_hcp2_img3.tif	(x=713.01 y=1121.24)	1	1	191.25	18.358168	5.600357
b375	0	Fperrara_SingleCell_Microscopy	fp_hcp2_img3.tif	(x=740.91 y=235.97)	1	1	299.83594	22.593817	6.382224
b388	0	Fperrara_SingleCell_Microscopy	fp_hcp2_img3.tif	(x=806.71 y=728.33)	1	1	405.03125	33.13597	5.9636292
b393	0	Fperrara_SingleCell_Microscopy	fp_hcp2_img3.tif	(x=824.81 y=1177.97)	1	1	388.25	27.256166	6.0717134
b400	0	Fperrara_SingleCell_Microscopy	fp_hcp2_img3.tif	(x=841.74 y=1735.98)	1	1	219.5	19.133621	4.426542
b402	0	Fperrara_SingleCell_Microscopy	fp_hcp2_img3.tif	(x=844.59 y=249.05)	1	1	309.97656	22.886162	6.5729337
b404	0	Fperrara_SingleCell_Microscopy	fp_hcp2_img3.tif	(x=850.91 y=1791.23)	1	1	347.625	27.2801	5.616168
b408	0	Fperrara_SingleCell_Microscopy	fp_hcp2_img3.tif	(x=853.24 y=774.03)	1	1	355.65625	21.370129	6.5944605
b410	0	Fperrara_SingleCell_Microscopy	fp_hcp2_img3.tif	(x=889.57 y=493.79)	1	1	2176.2812	105.88229	6.136534
b418	0	Fperrara_SingleCell_Microscopy	fp_hcp2_img3.tif	(x=868.79 y=995.73)	1	1	453.03125	27.91823	6.6066957
b436	0	Fperrara_SingleCell_Microscopy	fp_hcp2_img3.tif	(x=895.32 y=1585.18)	1	1	83.0625	10.431184	4.2295504
b444	0	Fperrara_SingleCell_Microscopy	fp_hcp2_img3.tif	(x=936.71 y=806.96)	1	1	292.96875	23.91946	6.13817
b476	0	Fperrara_SingleCell_Microscopy	fp_hcp2_img3.tif	(x=1007.38 y=284.64)	1	1	321.34375	22.105568	4.0438814
b487	0	Fperrara_SingleCell_Microscopy	fp_hcp2_img3.tif	(x=1027.30 y=437.90)	1	1	272.3125	21.165516	6.3722296
b490	0	Fperrara_SingleCell_Microscopy	fp_hcp2_img3.tif	(x=1042.42 y=1174.92)	1	1	327.125	24.088238	4.182737
b492	0	Fperrara_SingleCell_Microscopy	fp_hcp2_img3.tif	(x=1042.98 y=378.56)	1	1	323.0	24.59143	4.964779
b495	0	Fperrara_SingleCell_Microscopy	fp_hcp2_img3.tif	(x=1054.42 y=729.39)	1	1	530.71875	33.56767	6.7635717
b521	0	Fperrara_SingleCell_Microscopy	fp_hcp2_img3.tif	(x=1138.19 y=1621.49)	1	1	523.375	26.121103	6.080658
b523	0	Fperrara_SingleCell_Microscopy	fp_hcp2_img3.tif	(x=1146.43 y=739.70)	1	1	416.3125	29.771967	6.068733
b524	0	Fperrara_SingleCell_Microscopy	fp_hcp2_img3.tif	(x=1145.11 y=303.57)	1	1	387.32812	30.196123	6.1419344
b541	0	Fperrara_SingleCell_Microscopy	fp_hcp2_img3.tif	(x=1190.79 y=1106.84)	1	1	154.125	14.446189	5.0274506
b545	0	Fperrara_SingleCell_Microscopy	fp_hcp2_img3.tif	(x=1212.84 y=244.12)	1	1	380.04688	25.820587	6.540626
b547	0	Fperrara_SingleCell_Microscopy	fp_hcp2_img3.tif	(x=1251.80 y=758.35)	1	1	1122.7812	76.65965	5.8374434
b549	0	Fperrara_SingleCell_Microscopy	fp_hcp2_img3.tif	(x=1232.16 y=1921.73)	1	1	172.875	18.050737	4.754237
b554	0	Fperrara_SingleCell_Microscopy	fp_hcp2_img3.tif	(x=1259.43 y=477.19)	1	1	1102.7188	82.390015	4.4093814
b578	0	Fperrara_SingleCell_Microscopy	fp_hcp2_img3.tif	(x=1326.68 y=778.74)	1	1	240.375	18.156445	5.821577
b580	0	Fperrara_SingleCell_Microscopy	fp_hcp2_img3.tif	(x=1340.07 y=1605.35)	1	1	400.0	30.5353	5.740798
b584	0	Fperrara_SingleCell_Microscopy	fp_hcp2_img3.tif	(x=1349.90 y=384.07)	1	1	343.03125	26.460627	6.217848
b592	0	Fperrara_SingleCell_Microscopy	fp_hcp2_img3.tif	(x=1385.36 y=1270.78)	1	1	382.5625	30.79671	5.395179
b593	0	Fperrara_SingleCell_Microscopy	fp_hcp2_img3.tif	(x=1388.64 y=1301.73)	1	1	287.875	21.07684	5.9285564
b606	0	Fperrara_SingleCell_Microscopy	fp_hcp2_img3.tif	(x=1443.71 y=1455.30)	1	1	648.375	29.223724	6.083527
b612	0	Fperrara_SingleCell_Microscopy	fp_hcp2_img3.tif	(x=1460.02 y=1307.64)	1	1	172.3125	16.105799	5.3085437
b620	0	Fperrara_SingleCell_Microscopy	fp_hcp2_img3.tif	(x=1506.54 y=229.29)	1	1	281.34375	20.76433	6.3733296
b622	0	Fperrara_SingleCell_Microscopy	fp_hcp2_img3.tif	(x=1513.88 y=191.70)	1	1	295.35938	19.95087	4.105179
b631	0	Fperrara_SingleCell_Microscopy	fp_hcp2_img3.tif	(x=1531.42 y=1586.71)	1	1	223.375	18.739614	5.357606
b648	0	Fperrara_SingleCell_Microscopy	fp_hcp2_img3.tif	(x=1626.64 y=183.92)	1	1	875.75	51.490284	4.678598
b661	0	Fperrara_SingleCell_Microscopy	fp_hcp2_img3.tif	(x=1654.27 y=1506.18)	1	1	321.875	20.953085	4.5606155
b662	0	Fperrara_SingleCell_Microscopy	fp_hcp2_img3.tif	(x=1654.54 y=582.73)	1	1	392.78125	28.938194	4.3428655
b666	0	Fperrara_SingleCell_Microscopy	fp_hcp2_img3.tif	(x=1678.22 y=1265.64)	1	1	399.875	26.194899	6.010212
b672	0	Fperrara_SingleCell_Microscopy	fp_hcp2_img3.tif	(x=1694.52 y=884.51)	1	1	413.5	30.536282	4.2276673
b675	0	Fperrara_SingleCell_Microscopy	fp_hcp2_img3.tif	(x=1746.57 y=784.23)	1	1	1582.1875	129.37479	4.3151298
b710	0	Fperrara_SingleCell_Microscopy	fp_hcp2_img3.tif	(x=1805.93 y=488.95)	1	1	433.71875	28.15533	6.534302
b717	0	Fperrara_SingleCell_Microscopy	fp_hcp2_img3.tif	(x=1831.14 y=589.51)	1	1	302.3125	23.40857	6.025952
b718	0	Fperrara_SingleCell_Microscopy	fp_hcp2_img3.tif	(x=1835.12 y=831.29)	1	1	303.75	21.6087	5.803277
b731	0	Fperrara_SingleCell_Microscopy	fp_hcp2_img3.tif	(x=1879.34 y=450.14)	1	1	351.40625	26.021854	6.0716696
b745	0	Fperrara_SingleCell_Microscopy	fp_hcp2_img3.tif	(x=1926.18 y=196.63)	1	1	351.92188	27.312685	6.1798267
b769	0	Fperrara_SingleCell_Microscopy	fp_hcp2_img3.tif	(x=1987.16 y=1969.72)	1	1	234.875	17.661898	4.7934055
b774	0	Fperrara_SingleCell_Microscopy	fp_hcp2_img3.tif	(x=2029.48 y=863.54)	1	1	309.25	26.5337	4.569842
b776	0	Fperrara_SingleCell_Microscopy	fp_hcp2_img3.tif	(x=2028.98 y=1118.65)	1	1	297.5	27.417301	4.6436963
b810	0	Fperrara_SingleCell_Microscopy	fp_hcp2_img3.tif	(x=348.44 y=1856.25)	1	1	77.0625	12.712396	4.1454835
b812	0	Fperrara_SingleCell_Microscopy	fp_hcp2_img3.tif	(x=363.72 y=1858.00)	1	1	482.875	38.737	5.3315873
b848	0	Fperrara_SingleCell_Microscopy	fp_hcp2_img3.tif	(x=748.49 y=64.95)	1	1	346.16602	25.466465	6.5438766
b849	0	Fperrara_SingleCell_Microscopy	fp_hcp2_img3.tif	(x=754.93 y=78.85)	1	1	230.32812	23.361155	5.9157352
b3	0	Fperrara_SingleCell_Microscopy	fp_hcp2_img4.tif	(x=25.97 y=1713.03)	1	1	655.0156	40.0071	6.619139
b9	0	Fperrara_SingleCell_Microscopy	fp_hcp2_img4.tif	(x=36.24 y=821.70)	1	1	306.0547	22.332779	6.7600384
b10	0	Fperrara_SingleCell_Microscopy	fp_hcp2_img4.tif	(x=41.83 y=347.55)	1	1	518.3721	30.08939	5.675587
b27	0	Fperrara_SingleCell_Microscopy	fp_hcp2_img4.tif	(x=140.53 y=437.49)	1	1	387.8496	30.662983	6.666029
b29	0	Fperrara_SingleCell_Microscopy	fp_hcp2_img4.tif	(x=168.56 y=1195.69)	1	1	356.2422	23.718737	7.193758
b33	0	Fperrara_SingleCell_Microscopy	fp_hcp2_img4.tif	(x=186.91 y=555.53)	1	1	305.53125	20.78725	6.6481123
b35	0	Fperrara_SingleCell_Microscopy	fp_hcp2_img4.tif	(x=196.43 y=1466.14)	1	1	315.59375	22.884966	5.9297223
b38	0	Fperrara_SingleCell_Microscopy	fp_hcp2_img4.tif	(x=217.62 y=371.87)	1	1	316.71094	21.797031	6.8559527
b39	0	Fperrara_SingleCell_Microscopy	fp_hcp2_img4.tif	(x=219.27 y=1511.44)	1	1	305.0	21.595074	6.4785266
b42	0	Fperrara_SingleCell_Microscopy	fp_hcp2_img4.tif	(x=226.69 y=485.24)	1	1	286.79688	27.385319	4.7197647
b46	0	Fperrara_SingleCell_Microscopy	fp_hcp2_img4.tif	(x=268.06 y=833.15)	1	1	600.6406	39.134327	7.1294456
b58	0	Fperrara_SingleCell_Microscopy	fp_hcp2_img4.tif	(x=317.07 y=594.19)	1	1	432.1328	31.65844	6.903104
b66	0	Fperrara_SingleCell_Microscopy	fp_hcp2_img4.tif	(x=341.62 y=1339.82)	1	1	369.07812	35.19621	5.7046714
b71	0	Fperrara_SingleCell_Microscopy	fp_hcp2_img4.tif	(x=358.10 y=383.42)	1	1	261.51562	18.783798	6.129513
b73	0	Fperrara_SingleCell_Microscopy	fp_hcp2_img4.tif	(x=364.93 y=1638.04)	1	1	248.28125	20.263231	6.140951
b80	0	Fperrara_SingleCell_Microscopy	fp_hcp2_img4.tif	(x=389.83 y=1959.74)	1	1	203.28125	18.230497	6.095837
b89	0	Fperrara_SingleCell_Microscopy	fp_hcp2_img4.tif	(x=408.57 y=614.13)	1	1	378.01562	25.945414	6.888538
b97	0	Fperrara_SingleCell_Microscopy	fp_hcp2_img4.tif	(x=459.60 y=691.50)	1	1	293.82812	22.967457	6.5508456
b98	0	Fperrara_SingleCell_Microscopy	fp_hcp2_img4.tif	(x=461.94 y=1099.53)	1	1	318.28125	20.877964	7.132182
b103	0	Fperrara_SingleCell_Microscopy	fp_hcp2_img4.tif	(x=487.97 y=179.74)	1	1	195.57422	15.544536	4.7092676
b106	0	Fperrara_SingleCell_Microscopy	fp_hcp2_img4.tif	(x=519.40 y=1621.48)	1	1	376.34375	35.10897	4.0385923
b120	0	Fperrara_SingleCell_Microscopy	fp_hcp2_img4.tif	(x=589.92 y=544.96)	1	1	225.875	17.684973	6.3396244
b125	0	Fperrara_SingleCell_Microscopy	fp_hcp2_img4.tif	(x=605.76 y=1361.28)	1	1	852.96875	46.062176	4.825094
b133	0	Fperrara_SingleCell_Microscopy	fp_hcp2_img4.tif	(x=636.92 y=2003.70)	1	1	368.9375	23.278416	6.728591
b135	0	Fperrara_SingleCell_Microscopy	fp_hcp2_img4.tif	(x=638.75 y=823.33)	1	1	185.32812	16.262959	6.324891
b151	0	Fperrara_SingleCell_Microscopy	fp_hcp2_img4.tif	(x=730.38 y=213.99)	1	1	265.8047	21.28261	4.234545
b153	0	Fperrara_SingleCell_Microscopy	fp_hcp2_img4.tif	(x=740.43 y=1908.82)	1	1	407.5625	30.124973	6.525063
b155	0	Fperrara_SingleCell_Microscopy	fp_hcp2_img4.tif	(x=762.11 y=695.28)	1	1	298.6875	23.007404	6.851171
b159	0	Fperrara_SingleCell_Microscopy	fp_hcp2_img4.tif	(x=785.32 y=767.05)	1	1	324.40625	24.09793	6.754493
b164	0	Fperrara_SingleCell_Microscopy	fp_hcp2_img4.tif	(x=809.93 y=203.81)	1	1	279.3047	23.092987	4.5794134
b166	0	Fperrara_SingleCell_Microscopy	fp_hcp2_img4.tif	(x=819.39 y=1704.30)	1	1	313.5	24.235607	6.049349
b167	0	Fperrara_SingleCell_Microscopy	fp_hcp2_img4.tif	(x=826.76 y=1532.53)	1	1	283.3125	25.760841	5.794561
b168	0	Fperrara_SingleCell_Microscopy	fp_hcp2_img4.tif	(x=836.23 y=357.10)	1	1	544.8125	42.45382	6.4720387
b172	0	Fperrara_SingleCell_Microscopy	fp_hcp2_img4.tif	(x=845.67 y=259.56)	1	1	397.4297	28.09654	6.36623
b173	0	Fperrara_SingleCell_Microscopy	fp_hcp2_img4.tif	(x=852.79 y=797.73)	1	1	512.75	39.947903	4.0292606
b177	0	Fperrara_SingleCell_Microscopy	fp_hcp2_img4.tif	(x=873.34 y=1496.83)	1	1	885.5	41.243248	6.0662136
b185	0	Fperrara_SingleCell_Microscopy	fp_hcp2_img4.tif	(x=898.00 y=1679.01)	1	1	523.375	26.42271	6.5797415
b195	0	Fperrara_SingleCell_Microscopy	fp_hcp2_img4.tif	(x=945.49 y=465.11)	1	1	285.625	23.157078	4.8776417
b204	0	Fperrara_SingleCell_Microscopy	fp_hcp2_img4.tif	(x=1011.34 y=541.10)	1	1	353.25	21.36588	6.2709117
b217	0	Fperrara_SingleCell_Microscopy	fp_hcp2_img4.tif	(x=1076.04 y=1335.57)	1	1	326.625	22.924778	4.009617
b221	0	Fperrara_SingleCell_Microscopy	fp_hcp2_img4.tif	(x=1097.93 y=1921.73)	1	1	165.0625	16.113596	4.021567
b224	0	Fperrara_SingleCell_Microscopy	fp_hcp2_img4.tif	(x=1159.98 y=1363.76)	1	1	376.0625	27.279924	5.7639875
b227	0	Fperrara_SingleCell_Microscopy	fp_hcp2_img4.tif	(x=1173.94 y=1970.21)	1	1	363.0	23.529781	5.5978146
b228	0	Fperrara_SingleCell_Microscopy	fp_hcp2_img4.tif	(x=1182.18 y=1928.52)	1	1	297.625	22.762024	6.347998
b230	0	Fperrara_SingleCell_Microscopy	fp_hcp2_img4.tif	(x=1196.74 y=457.42)	1	1	382.625	28.917606	6.44985
b233	0	Fperrara_SingleCell_Microscopy	fp_hcp2_img4.tif	(x=1204.11 y=816.87)	1	1	267.1875	20.707312	6.7206097
b235	0	Fperrara_SingleCell_Microscopy	fp_hcp2_img4.tif	(x=1216.36 y=734.23)	1	1	364.0	28.524515	6.471143
b243	0	Fperrara_SingleCell_Microscopy	fp_hcp2_img4.tif	(x=1272.69 y=1723.57)	1	1	835.125	63.277725	5.7570143
b245	0	Fperrara_SingleCell_Microscopy	fp_hcp2_img4.tif	(x=1258.15 y=1432.12)	1	1	409.875	28.737053	6.8081093
b247	0	Fperrara_SingleCell_Microscopy	fp_hcp2_img4.tif	(x=1265.85 y=1918.06)	1	1	349.875	26.520784	5.8642244
b252	0	Fperrara_SingleCell_Microscopy	fp_hcp2_img4.tif	(x=1284.87 y=1283.54)	1	1	274.5	22.165506	6.350779
b253	0	Fperrara_SingleCell_Microscopy	fp_hcp2_img4.tif	(x=1285.75 y=1056.51)	1	1	218.5625	18.72484	4.286633
b258	0	Fperrara_SingleCell_Microscopy	fp_hcp2_img4.tif	(x=1328.60 y=113.67)	1	1	443.97656	34.371216	6.6429477
b260	0	Fperrara_SingleCell_Microscopy	fp_hcp2_img4.tif	(x=1340.02 y=1008.70)	1	1	342.6875	29.992508	4.740691
b262	0	Fperrara_SingleCell_Microscopy	fp_hcp2_img4.tif	(x=1335.83 y=467.75)	1	1	198.71875	19.667316	4.199731
b269	0	Fperrara_SingleCell_Microscopy	fp_hcp2_img4.tif	(x=1364.85 y=794.81)	1	1	341.375	28.114208	4.3014083
b272	0	Fperrara_SingleCell_Microscopy	fp_hcp2_img4.tif	(x=1398.72 y=1523.48)	1	1	231.75	20.220146	6.044488
b274	0	Fperrara_SingleCell_Microscopy	fp_hcp2_img4.tif	(x=1417.41 y=993.31)	1	1	364.6875	27.605673	6.7166424
b275	0	Fperrara_SingleCell_Microscopy	fp_hcp2_img4.tif	(x=1421.55 y=1058.56)	1	1	493.875	34.26874	6.4806595
b276	0	Fperrara_SingleCell_Microscopy	fp_hcp2_img4.tif	(x=1433.76 y=1114.14)	1	1	323.875	23.375366	6.868857
b280	0	Fperrara_SingleCell_Microscopy	fp_hcp2_img4.tif	(x=1457.46 y=873.13)	1	1	299.25	24.796532	4.632945
b282	0	Fperrara_SingleCell_Microscopy	fp_hcp2_img4.tif	(x=1483.06 y=480.34)	1	1	401.15625	34.582073	5.6766815
b285	0	Fperrara_SingleCell_Microscopy	fp_hcp2_img4.tif	(x=1498.70 y=1614.72)	1	1	408.875	28.696491	5.152392
b287	0	Fperrara_SingleCell_Microscopy	fp_hcp2_img4.tif	(x=1512.01 y=968.99)	1	1	545.3125	42.78216	6.486643
b293	0	Fperrara_SingleCell_Microscopy	fp_hcp2_img4.tif	(x=1512.15 y=1720.99)	1	1	388.0	29.04249	5.8111014
b294	0	Fperrara_SingleCell_Microscopy	fp_hcp2_img4.tif	(x=1523.98 y=52.18)	1	1	317.73047	24.2021	6.4860406
b296	0	Fperrara_SingleCell_Microscopy	fp_hcp2_img4.tif	(x=1555.06 y=587.10)	1	1	598.1875	28.675074	7.054776
b297	0	Fperrara_SingleCell_Microscopy	fp_hcp2_img4.tif	(x=1554.64 y=2035.13)	1	1	290.125	22.390207	5.975429
b298	0	Fperrara_SingleCell_Microscopy	fp_hcp2_img4.tif	(x=1575.70 y=248.47)	1	1	257.79688	20.638956	6.2861524
b300	0	Fperrara_SingleCell_Microscopy	fp_hcp2_img4.tif	(x=1590.40 y=288.26)	1	1	413.70312	29.671932	6.735021
b306	0	Fperrara_SingleCell_Microscopy	fp_hcp2_img4.tif	(x=1612.55 y=1252.67)	1	1	440.9375	27.99119	6.7219
b310	0	Fperrara_SingleCell_Microscopy	fp_hcp2_img4.tif	(x=1619.92 y=1313.39)	1	1	234.625	19.704811	4.270501
b311	0	Fperrara_SingleCell_Microscopy	fp_hcp2_img4.tif	(x=1632.07 y=121.65)	1	1	424.60156	29.775557	6.9629297
b314	0	Fperrara_SingleCell_Microscopy	fp_hcp2_img4.tif	(x=1638.60 y=1780.72)	1	1	305.625	21.248924	6.320068
b315	0	Fperrara_SingleCell_Microscopy	fp_hcp2_img4.tif	(x=1647.04 y=1118.35)	1	1	375.625	26.928095	6.3975897
b322	0	Fperrara_SingleCell_Microscopy	fp_hcp2_img4.tif	(x=1723.01 y=174.70)	1	1	391.84375	29.668182	6.6791434
b324	0	Fperrara_SingleCell_Microscopy	fp_hcp2_img4.tif	(x=1736.49 y=1720.73)	1	1	103.25	14.315995	4.564398
b325	0	Fperrara_SingleCell_Microscopy	fp_hcp2_img4.tif	(x=1750.93 y=1021.87)	1	1	392.5625	37.12305	4.2988105
b326	0	Fperrara_SingleCell_Microscopy	fp_hcp2_img4.tif	(x=1749.22 y=1484.55)	1	1	324.625	28.753145	5.549359
b331	0	Fperrara_SingleCell_Microscopy	fp_hcp2_img4.tif	(x=1813.52 y=501.80)	1	1	228.40625	19.579706	6.3602095
b332	0	Fperrara_SingleCell_Microscopy	fp_hcp2_img4.tif	(x=1822.16 y=423.40)	1	1	351.75	32.081276	5.475467
b334	0	Fperrara_SingleCell_Microscopy	fp_hcp2_img4.tif	(x=1833.72 y=203.27)	1	1	572.3906	33.016052	6.6672773
b340	0	Fperrara_SingleCell_Microscopy	fp_hcp2_img4.tif	(x=1884.11 y=273.30)	1	1	516.21875	45.674526	4.5527062
b341	0	Fperrara_SingleCell_Microscopy	fp_hcp2_img4.tif	(x=1885.61 y=1826.99)	1	1	445.875	25.047113	6.4280257
b351	0	Fperrara_SingleCell_Microscopy	fp_hcp2_img4.tif	(x=1932.67 y=211.97)	1	1	299.39062	24.677923	4.070168
b356	0	Fperrara_SingleCell_Microscopy	fp_hcp2_img4.tif	(x=1965.69 y=1671.69)	1	1	613.75	36.29224	6.5803676
b357	0	Fperrara_SingleCell_Microscopy	fp_hcp2_img4.tif	(x=1992.36 y=226.61)	1	1	331.125	23.417578	5.0653505
b511	0	Fperrara_SingleCell_Microscopy	fp_hcp2_img4.tif	(x=1959.09 y=452.88)	1	1	278.375	23.33353	6.2530727
b6	0	Fperrara_SingleCell_Microscopy	fp_hcp2_img5.tif	(x=25.15 y=272.74)	1	1	409.77197	34.417587	4.3508005
b16	0	Fperrara_SingleCell_Microscopy	fp_hcp2_img5.tif	(x=93.74 y=461.84)	1	1	390.6582	26.94994	6.219783
b22	0	Fperrara_SingleCell_Microscopy	fp_hcp2_img5.tif	(x=137.49 y=1819.57)	1	1	228.5625	22.578789	4.411474
b23	0	Fperrara_SingleCell_Microscopy	fp_hcp2_img5.tif	(x=141.77 y=71.49)	1	1	463.38354	33.586887	5.798219
b26	0	Fperrara_SingleCell_Microscopy	fp_hcp2_img5.tif	(x=169.81 y=1466.83)	1	1	478.4297	30.802797	6.978786
b34	0	Fperrara_SingleCell_Microscopy	fp_hcp2_img5.tif	(x=307.67 y=119.45)	1	1	4313.1045	98.56389	5.260187
b36	0	Fperrara_SingleCell_Microscopy	fp_hcp2_img5.tif	(x=270.47 y=1492.68)	1	1	330.10938	23.267332	6.4496245
b37	0	Fperrara_SingleCell_Microscopy	fp_hcp2_img5.tif	(x=274.32 y=190.29)	1	1	256.25	19.8602	5.277567
b38	0	Fperrara_SingleCell_Microscopy	fp_hcp2_img5.tif	(x=283.05 y=520.93)	1	1	362.125	24.871914	6.0848336
b40	0	Fperrara_SingleCell_Microscopy	fp_hcp2_img5.tif	(x=280.53 y=1579.01)	1	1	261.46875	21.243843	6.239976
b41	0	Fperrara_SingleCell_Microscopy	fp_hcp2_img5.tif	(x=293.72 y=1961.12)	1	1	159.1875	16.003117	4.220574
b45	0	Fperrara_SingleCell_Microscopy	fp_hcp2_img5.tif	(x=328.91 y=267.95)	1	1	285.85547	19.024622	5.1064925
b46	0	Fperrara_SingleCell_Microscopy	fp_hcp2_img5.tif	(x=348.97 y=870.40)	1	1	266.1875	22.161673	5.3257723
b47	0	Fperrara_SingleCell_Microscopy	fp_hcp2_img5.tif	(x=354.76 y=430.98)	1	1	431.28125	26.199139	5.534049
b50	0	Fperrara_SingleCell_Microscopy	fp_hcp2_img5.tif	(x=382.00 y=1049.61)	1	1	363.23438	26.14574	6.5451427
b63	0	Fperrara_SingleCell_Microscopy	fp_hcp2_img5.tif	(x=445.70 y=1412.96)	1	1	319.75	23.321522	6.2158337
b70	0	Fperrara_SingleCell_Microscopy	fp_hcp2_img5.tif	(x=469.32 y=1866.05)	1	1	282.84375	24.514568	6.0890565
b78	0	Fperrara_SingleCell_Microscopy	fp_hcp2_img5.tif	(x=508.47 y=562.30)	1	1	455.70312	43.486187	4.2724504
b80	0	Fperrara_SingleCell_Microscopy	fp_hcp2_img5.tif	(x=511.11 y=521.24)	1	1	265.48438	26.106943	4.1504936
b84	0	Fperrara_SingleCell_Microscopy	fp_hcp2_img5.tif	(x=524.12 y=1353.55)	1	1	319.90625	22.24876	6.4980145
b85	0	Fperrara_SingleCell_Microscopy	fp_hcp2_img5.tif	(x=532.67 y=1253.64)	1	1	292.34375	22.570038	5.91689
b86	0	Fperrara_SingleCell_Microscopy	fp_hcp2_img5.tif	(x=537.83 y=212.57)	1	1	520.5625	30.161999	6.6418796
b87	0	Fperrara_SingleCell_Microscopy	fp_hcp2_img5.tif	(x=545.84 y=405.30)	1	1	544.2969	42.14799	5.7552323
b90	0	Fperrara_SingleCell_Microscopy	fp_hcp2_img5.tif	(x=537.46 y=991.49)	1	1	210.48438	17.032524	5.1687117
b93	0	Fperrara_SingleCell_Microscopy	fp_hcp2_img5.tif	(x=550.56 y=1127.79)	1	1	289.75	21.022444	5.0221095
b97	0	Fperrara_SingleCell_Microscopy	fp_hcp2_img5.tif	(x=578.78 y=594.75)	1	1	248.90625	19.807222	5.629285
b99	0	Fperrara_SingleCell_Microscopy	fp_hcp2_img5.tif	(x=588.56 y=1999.52)	1	1	541.75	35.503742	4.336027
b101	0	Fperrara_SingleCell_Microscopy	fp_hcp2_img5.tif	(x=587.19 y=45.66)	1	1	317.65527	24.838573	4.2735047
b108	0	Fperrara_SingleCell_Microscopy	fp_hcp2_img5.tif	(x=612.19 y=42.19)	1	1	424.29004	30.305794	4.137978
b110	0	Fperrara_SingleCell_Microscopy	fp_hcp2_img5.tif	(x=618.20 y=1892.98)	1	1	366.0625	29.158201	5.8987226
b117	0	Fperrara_SingleCell_Microscopy	fp_hcp2_img5.tif	(x=638.22 y=1716.40)	1	1	120.25	14.2155485	4.085789
b129	0	Fperrara_SingleCell_Microscopy	fp_hcp2_img5.tif	(x=722.42 y=483.60)	1	1	363.17188	24.918098	5.827839
b132	0	Fperrara_SingleCell_Microscopy	fp_hcp2_img5.tif	(x=730.40 y=1112.75)	1	1	285.25	18.975983	6.0256457
b133	0	Fperrara_SingleCell_Microscopy	fp_hcp2_img5.tif	(x=751.59 y=1040.65)	1	1	695.15625	43.148407	6.953199
b135	0	Fperrara_SingleCell_Microscopy	fp_hcp2_img5.tif	(x=784.12 y=584.54)	1	1	481.35938	38.329197	5.7167897
b142	0	Fperrara_SingleCell_Microscopy	fp_hcp2_img5.tif	(x=814.14 y=1345.60)	1	1	251.5625	21.844765	6.072254
b143	0	Fperrara_SingleCell_Microscopy	fp_hcp2_img5.tif	(x=861.25 y=1177.20)	1	1	987.96875	78.816414	6.144772
b154	0	Fperrara_SingleCell_Microscopy	fp_hcp2_img5.tif	(x=877.28 y=1927.47)	1	1	200.0625	18.665281	5.857027
b159	0	Fperrara_SingleCell_Microscopy	fp_hcp2_img5.tif	(x=902.35 y=175.19)	1	1	641.7656	40.869976	6.0016193
b160	0	Fperrara_SingleCell_Microscopy	fp_hcp2_img5.tif	(x=897.92 y=258.88)	1	1	308.10156	25.894398	4.819585
b171	0	Fperrara_SingleCell_Microscopy	fp_hcp2_img5.tif	(x=967.66 y=1682.37)	1	1	437.375	24.937998	6.831917
b177	0	Fperrara_SingleCell_Microscopy	fp_hcp2_img5.tif	(x=998.54 y=234.92)	1	1	405.76562	30.483156	5.940353
b178	0	Fperrara_SingleCell_Microscopy	fp_hcp2_img5.tif	(x=994.05 y=82.73)	1	1	395.84766	28.908684	6.2455587
b179	0	Fperrara_SingleCell_Microscopy	fp_hcp2_img5.tif	(x=999.12 y=2018.68)	1	1	539.625	30.543255	7.3110695
b180	0	Fperrara_SingleCell_Microscopy	fp_hcp2_img5.tif	(x=996.46 y=1517.97)	1	1	363.75	21.515516	6.3241873
b181	0	Fperrara_SingleCell_Microscopy	fp_hcp2_img5.tif	(x=1009.01 y=1562.43)	1	1	217.0	19.107609	5.8443804
b185	0	Fperrara_SingleCell_Microscopy	fp_hcp2_img5.tif	(x=1049.08 y=1132.62)	1	1	681.0625	45.060017	6.7964096
b191	0	Fperrara_SingleCell_Microscopy	fp_hcp2_img5.tif	(x=1076.48 y=1714.40)	1	1	375.125	32.666626	5.3855686
b193	0	Fperrara_SingleCell_Microscopy	fp_hcp2_img5.tif	(x=1094.81 y=1566.76)	1	1	365.5625	27.444992	6.4460363
b199	0	Fperrara_SingleCell_Microscopy	fp_hcp2_img5.tif	(x=1126.01 y=202.26)	1	1	678.9531	54.426476	4.2027225
b201	0	Fperrara_SingleCell_Microscopy	fp_hcp2_img5.tif	(x=1118.81 y=1470.71)	1	1	269.5625	20.713537	6.2101707
b202	0	Fperrara_SingleCell_Microscopy	fp_hcp2_img5.tif	(x=1122.01 y=1868.67)	1	1	407.75	25.472593	4.4195347
b205	0	Fperrara_SingleCell_Microscopy	fp_hcp2_img5.tif	(x=1138.30 y=407.18)	1	1	358.75	33.41952	4.6236935
b208	0	Fperrara_SingleCell_Microscopy	fp_hcp2_img5.tif	(x=1138.80 y=107.98)	1	1	288.59375	22.487143	5.8124595
b213	0	Fperrara_SingleCell_Microscopy	fp_hcp2_img5.tif	(x=1162.82 y=632.20)	1	1	505.46875	36.65401	6.467347
b217	0	Fperrara_SingleCell_Microscopy	fp_hcp2_img5.tif	(x=1176.44 y=917.81)	1	1	267.9375	21.160892	5.5497713
b221	0	Fperrara_SingleCell_Microscopy	fp_hcp2_img5.tif	(x=1210.75 y=339.11)	1	1	510.375	41.079895	5.0736685
b222	0	Fperrara_SingleCell_Microscopy	fp_hcp2_img5.tif	(x=1217.74 y=586.15)	1	1	220.65625	22.083288	4.0781164
b224	0	Fperrara_SingleCell_Microscopy	fp_hcp2_img5.tif	(x=1249.39 y=1094.94)	1	1	549.3125	56.7493	5.0437503
b233	0	Fperrara_SingleCell_Microscopy	fp_hcp2_img5.tif	(x=1263.05 y=1735.32)	1	1	368.125	28.26622	6.5107684
b235	0	Fperrara_SingleCell_Microscopy	fp_hcp2_img5.tif	(x=1264.92 y=277.52)	1	1	183.79688	14.883889	5.05516
b237	0	Fperrara_SingleCell_Microscopy	fp_hcp2_img5.tif	(x=1277.58 y=1639.90)	1	1	314.8125	24.940958	6.438692
b244	0	Fperrara_SingleCell_Microscopy	fp_hcp2_img5.tif	(x=1301.31 y=1804.71)	1	1	261.375	22.282097	6.206462
b247	0	Fperrara_SingleCell_Microscopy	fp_hcp2_img5.tif	(x=1319.55 y=1972.43)	1	1	404.125	26.933823	6.692396
b248	0	Fperrara_SingleCell_Microscopy	fp_hcp2_img5.tif	(x=1317.62 y=1568.80)	1	1	222.125	18.613993	5.887507
b251	0	Fperrara_SingleCell_Microscopy	fp_hcp2_img5.tif	(x=1375.72 y=1407.08)	1	1	261.3125	24.827614	4.3690195
b252	0	Fperrara_SingleCell_Microscopy	fp_hcp2_img5.tif	(x=1383.00 y=1090.54)	1	1	330.5625	25.445696	4.17773
b254	0	Fperrara_SingleCell_Microscopy	fp_hcp2_img5.tif	(x=1392.94 y=292.33)	1	1	280.78125	24.62454	5.3933387
b256	0	Fperrara_SingleCell_Microscopy	fp_hcp2_img5.tif	(x=1402.12 y=221.85)	1	1	278.3125	21.025232	5.46932
b257	0	Fperrara_SingleCell_Microscopy	fp_hcp2_img5.tif	(x=1416.52 y=125.10)	1	1	267.22656	19.198616	5.6538186
b259	0	Fperrara_SingleCell_Microscopy	fp_hcp2_img5.tif	(x=1423.22 y=868.30)	1	1	244.5625	19.805767	6.100418
b261	0	Fperrara_SingleCell_Microscopy	fp_hcp2_img5.tif	(x=1436.24 y=1801.13)	1	1	323.5	25.203308	6.327993
b263	0	Fperrara_SingleCell_Microscopy	fp_hcp2_img5.tif	(x=1450.91 y=532.87)	1	1	295.5	24.066154	4.555422
b264	0	Fperrara_SingleCell_Microscopy	fp_hcp2_img5.tif	(x=1450.83 y=1435.24)	1	1	331.3125	22.041555	6.5904646
b269	0	Fperrara_SingleCell_Microscopy	fp_hcp2_img5.tif	(x=1463.75 y=46.50)	1	1	230.42383	18.079933	5.378863
b270	0	Fperrara_SingleCell_Microscopy	fp_hcp2_img5.tif	(x=1472.29 y=1619.97)	1	1	406.5	32.570595	6.0644417
b271	0	Fperrara_SingleCell_Microscopy	fp_hcp2_img5.tif	(x=1476.63 y=87.51)	1	1	388.53125	24.207922	6.3936796
b285	0	Fperrara_SingleCell_Microscopy	fp_hcp2_img5.tif	(x=1559.91 y=1978.80)	1	1	497.625	39.924664	6.4318366
b287	0	Fperrara_SingleCell_Microscopy	fp_hcp2_img5.tif	(x=1564.30 y=1416.21)	1	1	129.375	12.954116	5.241196
b298	0	Fperrara_SingleCell_Microscopy	fp_hcp2_img5.tif	(x=1662.25 y=1459.53)	1	1	617.75	41.601204	6.422961
b300	0	Fperrara_SingleCell_Microscopy	fp_hcp2_img5.tif	(x=1685.33 y=968.96)	1	1	1030.9375	57.81277	4.851765
b309	0	Fperrara_SingleCell_Microscopy	fp_hcp2_img5.tif	(x=1721.83 y=1542.21)	1	1	363.75	24.94854	6.731844
b312	0	Fperrara_SingleCell_Microscopy	fp_hcp2_img5.tif	(x=1731.51 y=417.49)	1	1	370.0	33.91283	4.726056
b313	0	Fperrara_SingleCell_Microscopy	fp_hcp2_img5.tif	(x=1738.63 y=1436.06)	1	1	336.875	27.976263	6.1665664
b316	0	Fperrara_SingleCell_Microscopy	fp_hcp2_img5.tif	(x=1747.36 y=545.61)	1	1	275.4375	23.031925	5.934788
b318	0	Fperrara_SingleCell_Microscopy	fp_hcp2_img5.tif	(x=1766.86 y=39.19)	1	1	327.1289	23.234076	5.6555223
b320	0	Fperrara_SingleCell_Microscopy	fp_hcp2_img5.tif	(x=1824.66 y=802.35)	1	1	388.0	30.770151	4.7970467
b321	0	Fperrara_SingleCell_Microscopy	fp_hcp2_img5.tif	(x=1823.30 y=193.11)	1	1	309.21875	22.724745	5.7363725
b322	0	Fperrara_SingleCell_Microscopy	fp_hcp2_img5.tif	(x=1832.48 y=637.37)	1	1	276.875	24.808842	5.6355844
b323	0	Fperrara_SingleCell_Microscopy	fp_hcp2_img5.tif	(x=1849.38 y=1666.23)	1	1	253.75	19.88785	6.5205793
b328	0	Fperrara_SingleCell_Microscopy	fp_hcp2_img5.tif	(x=1865.27 y=1431.25)	1	1	390.625	28.048574	6.6220694
b332	0	Fperrara_SingleCell_Microscopy	fp_hcp2_img5.tif	(x=1901.21 y=511.12)	1	1	553.96875	37.140247	6.4090385
b337	0	Fperrara_SingleCell_Microscopy	fp_hcp2_img5.tif	(x=1969.24 y=1893.19)	1	1	934.75	51.983322	6.8953314
b338	0	Fperrara_SingleCell_Microscopy	fp_hcp2_img5.tif	(x=1959.55 y=116.87)	1	1	393.89844	24.151213	6.3306746
b340	0	Fperrara_SingleCell_Microscopy	fp_hcp2_img5.tif	(x=1999.74 y=95.30)	1	1	342.85938	25.46604	5.982392
b343	0	Fperrara_SingleCell_Microscopy	fp_hcp2_img5.tif	(x=2015.59 y=1194.63)	1	1	347.875	34.08482	6.0061064
b364	0	Fperrara_SingleCell_Microscopy	fp_hcp2_img5.tif	(x=122.99 y=1776.57)	1	1	368.8672	28.152414	6.4773736
b365	0	Fperrara_SingleCell_Microscopy	fp_hcp2_img5.tif	(x=130.86 y=1756.17)	1	1	419.89844	35.333836	5.5304
b14	0	Fperrara_SingleCell_Microscopy	fp_hcp12_img1.tif	(x=38.19 y=1883.35)	1	1	310.57422	23.312433	5.054044
b16	0	Fperrara_SingleCell_Microscopy	fp_hcp12_img1.tif	(x=37.87 y=1772.35)	1	1	321.31445	27.271595	4.199597
b79	0	Fperrara_SingleCell_Microscopy	fp_hcp12_img1.tif	(x=181.61 y=708.33)	1	1	269.20703	22.42057	5.7801723
b93	0	Fperrara_SingleCell_Microscopy	fp_hcp12_img1.tif	(x=219.63 y=1311.22)	1	1	517.03125	27.847815	4.406484
b149	0	Fperrara_SingleCell_Microscopy	fp_hcp12_img1.tif	(x=378.75 y=1227.67)	1	1	588.1875	39.24448	6.098527
b151	0	Fperrara_SingleCell_Microscopy	fp_hcp12_img1.tif	(x=409.60 y=45.05)	1	1	1322.6333	55.460995	5.473585
b153	0	Fperrara_SingleCell_Microscopy	fp_hcp12_img1.tif	(x=408.64 y=1994.48)	1	1	339.1875	25.30016	5.307514
b166	0	Fperrara_SingleCell_Microscopy	fp_hcp12_img1.tif	(x=479.58 y=1516.05)	1	1	452.71875	37.96467	5.630021
b172	0	Fperrara_SingleCell_Microscopy	fp_hcp12_img1.tif	(x=521.01 y=539.87)	1	1	1488.5625	103.1079	5.686109
b199	0	Fperrara_SingleCell_Microscopy	fp_hcp12_img1.tif	(x=543.40 y=1286.23)	1	1	357.09375	29.727274	5.6668453
b262	0	Fperrara_SingleCell_Microscopy	fp_hcp12_img1.tif	(x=692.71 y=751.67)	1	1	359.125	25.981228	5.611226
b263	0	Fperrara_SingleCell_Microscopy	fp_hcp12_img1.tif	(x=705.61 y=962.74)	1	1	498.1875	37.19756	4.6537256
b285	0	Fperrara_SingleCell_Microscopy	fp_hcp12_img1.tif	(x=781.87 y=1626.88)	1	1	714.75	64.503174	4.5607715
b293	0	Fperrara_SingleCell_Microscopy	fp_hcp12_img1.tif	(x=786.11 y=362.87)	1	1	336.34375	21.618462	5.9797893
b320	0	Fperrara_SingleCell_Microscopy	fp_hcp12_img1.tif	(x=841.49 y=481.37)	1	1	393.67188	24.134308	5.5903497
b323	0	Fperrara_SingleCell_Microscopy	fp_hcp12_img1.tif	(x=861.73 y=1108.89)	1	1	294.25	25.188782	5.8084974
b325	0	Fperrara_SingleCell_Microscopy	fp_hcp12_img1.tif	(x=870.81 y=1638.73)	1	1	339.8125	25.81926	4.8643155
b330	0	Fperrara_SingleCell_Microscopy	fp_hcp12_img1.tif	(x=888.26 y=206.61)	1	1	651.8047	40.147896	5.953861
b335	0	Fperrara_SingleCell_Microscopy	fp_hcp12_img1.tif	(x=938.80 y=899.60)	1	1	1012.96875	85.38133	4.2859626
b338	0	Fperrara_SingleCell_Microscopy	fp_hcp12_img1.tif	(x=913.90 y=704.00)	1	1	376.9375	26.758585	5.82903
b349	0	Fperrara_SingleCell_Microscopy	fp_hcp12_img1.tif	(x=961.01 y=1432.55)	1	1	637.375	37.208218	5.777738
b388	0	Fperrara_SingleCell_Microscopy	fp_hcp12_img1.tif	(x=1032.07 y=551.37)	1	1	450.0625	32.17007	5.869074
b390	0	Fperrara_SingleCell_Microscopy	fp_hcp12_img1.tif	(x=1041.60 y=832.62)	1	1	188.28125	16.72452	4.995923
b391	0	Fperrara_SingleCell_Microscopy	fp_hcp12_img1.tif	(x=1046.67 y=778.75)	1	1	568.65625	37.9073	6.067597
b420	0	Fperrara_SingleCell_Microscopy	fp_hcp12_img1.tif	(x=1104.62 y=31.54)	1	1	362.72852	22.420336	4.7808285
b428	0	Fperrara_SingleCell_Microscopy	fp_hcp12_img1.tif	(x=1152.60 y=608.44)	1	1	641.125	29.210205	5.212156
b437	0	Fperrara_SingleCell_Microscopy	fp_hcp12_img1.tif	(x=1194.41 y=1522.96)	1	1	460.0625	26.219086	4.2145944
b441	0	Fperrara_SingleCell_Microscopy	fp_hcp12_img1.tif	(x=1226.73 y=1751.27)	1	1	663.125	29.219032	5.360206
b446	0	Fperrara_SingleCell_Microscopy	fp_hcp12_img1.tif	(x=1248.40 y=1130.29)	1	1	534.0	42.995777	4.985298
b461	0	Fperrara_SingleCell_Microscopy	fp_hcp12_img1.tif	(x=1322.62 y=1223.62)	1	1	319.9375	23.748209	5.811009
b466	0	Fperrara_SingleCell_Microscopy	fp_hcp12_img1.tif	(x=1371.27 y=572.62)	1	1	325.28125	24.108242	5.291057
b467	0	Fperrara_SingleCell_Microscopy	fp_hcp12_img1.tif	(x=1386.74 y=1691.00)	1	1	474.375	30.777962	4.0343924
b468	0	Fperrara_SingleCell_Microscopy	fp_hcp12_img1.tif	(x=1396.65 y=1985.39)	1	1	653.625	44.355667	5.743456
b469	0	Fperrara_SingleCell_Microscopy	fp_hcp12_img1.tif	(x=1389.87 y=418.17)	1	1	414.0	26.323357	5.499171
b471	0	Fperrara_SingleCell_Microscopy	fp_hcp12_img1.tif	(x=1405.75 y=1161.79)	1	1	1380.9375	46.4103	5.7574873
b474	0	Fperrara_SingleCell_Microscopy	fp_hcp12_img1.tif	(x=1431.00 y=24.71)	1	1	768.01074	38.96656	4.5115037
b482	0	Fperrara_SingleCell_Microscopy	fp_hcp12_img1.tif	(x=1479.40 y=1805.69)	1	1	600.5	45.536964	5.5584955
b495	0	Fperrara_SingleCell_Microscopy	fp_hcp12_img1.tif	(x=1549.56 y=2025.58)	1	1	838.875	45.76303	6.2125974
b497	0	Fperrara_SingleCell_Microscopy	fp_hcp12_img1.tif	(x=1553.85 y=1742.02)	1	1	636.875	43.707653	4.300294
b501	0	Fperrara_SingleCell_Microscopy	fp_hcp12_img1.tif	(x=1566.97 y=1595.59)	1	1	539.375	34.384014	4.243894
b511	0	Fperrara_SingleCell_Microscopy	fp_hcp12_img1.tif	(x=1639.39 y=1754.85)	1	1	892.25	35.835796	5.3302083
b512	0	Fperrara_SingleCell_Microscopy	fp_hcp12_img1.tif	(x=1635.66 y=1021.45)	1	1	339.0	21.374548	5.237917
b526	0	Fperrara_SingleCell_Microscopy	fp_hcp12_img1.tif	(x=1727.85 y=1561.00)	1	1	693.25	60.247543	4.5078115
b531	0	Fperrara_SingleCell_Microscopy	fp_hcp12_img1.tif	(x=1746.21 y=1654.34)	1	1	483.5	39.271057	4.0291986
b532	0	Fperrara_SingleCell_Microscopy	fp_hcp12_img1.tif	(x=1748.81 y=529.52)	1	1	414.4375	29.60449	5.206577
b534	0	Fperrara_SingleCell_Microscopy	fp_hcp12_img1.tif	(x=1792.39 y=284.37)	1	1	686.15625	56.71688	4.0101147
b535	0	Fperrara_SingleCell_Microscopy	fp_hcp12_img1.tif	(x=1780.66 y=1890.13)	1	1	337.125	28.24237	5.811121
b538	0	Fperrara_SingleCell_Microscopy	fp_hcp12_img1.tif	(x=1797.42 y=1770.40)	1	1	761.75	46.162663	4.4553194
b545	0	Fperrara_SingleCell_Microscopy	fp_hcp12_img1.tif	(x=1813.95 y=538.08)	1	1	268.125	19.822145	4.2549124
b546	0	Fperrara_SingleCell_Microscopy	fp_hcp12_img1.tif	(x=1828.56 y=936.73)	1	1	406.6875	30.325214	4.094523
b547	0	Fperrara_SingleCell_Microscopy	fp_hcp12_img1.tif	(x=1824.91 y=1588.13)	1	1	188.0	17.911518	4.733284
b548	0	Fperrara_SingleCell_Microscopy	fp_hcp12_img1.tif	(x=1840.04 y=1689.06)	1	1	717.75	35.40887	4.0261054
b551	0	Fperrara_SingleCell_Microscopy	fp_hcp12_img1.tif	(x=1848.51 y=729.00)	1	1	636.875	29.65569	4.681335
b575	0	Fperrara_SingleCell_Microscopy	fp_hcp12_img1.tif	(x=1977.57 y=336.94)	1	1	394.0625	24.171877	4.745004
b581	0	Fperrara_SingleCell_Microscopy	fp_hcp12_img1.tif	(x=2000.47 y=771.03)	1	1	313.8125	20.557062	4.527502
b591	0	Fperrara_SingleCell_Microscopy	fp_hcp12_img1.tif	(x=2029.29 y=1442.98)	1	1	368.625	24.244547	4.56242
b592	0	Fperrara_SingleCell_Microscopy	fp_hcp12_img1.tif	(x=2032.47 y=78.45)	1	1	413.54688	23.971474	4.4992166
b602	0	Fperrara_SingleCell_Microscopy	fp_hcp12_img1.tif	(x=57.57 y=1081.34)	1	1	252.46875	21.742481	4.8342047
b609	0	Fperrara_SingleCell_Microscopy	fp_hcp12_img1.tif	(x=95.30 y=1278.55)	1	1	243.84766	23.931995	6.041221
b610	0	Fperrara_SingleCell_Microscopy	fp_hcp12_img1.tif	(x=102.15 y=1294.09)	1	1	194.52344	21.42932	5.503734
b612	0	Fperrara_SingleCell_Microscopy	fp_hcp12_img1.tif	(x=112.33 y=1289.68)	1	1	170.70312	18.385147	5.5659475
b613	0	Fperrara_SingleCell_Microscopy	fp_hcp12_img1.tif	(x=112.13 y=1270.77)	1	1	188.60156	18.292376	5.3875155
b625	0	Fperrara_SingleCell_Microscopy	fp_hcp12_img1.tif	(x=154.12 y=420.49)	1	1	402.4414	35.03541	5.132801
b626	0	Fperrara_SingleCell_Microscopy	fp_hcp12_img1.tif	(x=179.26 y=394.87)	1	1	686.4707	53.933514	5.5819507
b627	0	Fperrara_SingleCell_Microscopy	fp_hcp12_img1.tif	(x=178.18 y=412.62)	1	1	282.60938	25.400003	5.2378774
b655	0	Fperrara_SingleCell_Microscopy	fp_hcp12_img1.tif	(x=277.47 y=1445.95)	1	1	369.17188	37.15011	4.133344
b14	0	Fperrara_SingleCell_Microscopy	fp_hcp12_img2.tif	(x=42.46 y=301.90)	1	1	296.52295	26.504635	4.118811
b24	0	Fperrara_SingleCell_Microscopy	fp_hcp12_img2.tif	(x=90.72 y=70.10)	1	1	995.98584	71.15585	5.953982
b35	0	Fperrara_SingleCell_Microscopy	fp_hcp12_img2.tif	(x=98.47 y=279.15)	1	1	474.76074	37.053944	6.114822
b40	0	Fperrara_SingleCell_Microscopy	fp_hcp12_img2.tif	(x=115.41 y=572.14)	1	1	480.66797	27.638926	6.7313137
b43	0	Fperrara_SingleCell_Microscopy	fp_hcp12_img2.tif	(x=120.04 y=784.35)	1	1	617.02344	32.909794	6.8442287
b45	0	Fperrara_SingleCell_Microscopy	fp_hcp12_img2.tif	(x=127.74 y=1479.99)	1	1	245.85156	23.689459	4.321842
b51	0	Fperrara_SingleCell_Microscopy	fp_hcp12_img2.tif	(x=149.38 y=258.95)	1	1	711.43945	34.38446	6.023139
b60	0	Fperrara_SingleCell_Microscopy	fp_hcp12_img2.tif	(x=180.62 y=423.63)	1	1	461.6211	38.01897	6.1053653
b79	0	Fperrara_SingleCell_Microscopy	fp_hcp12_img2.tif	(x=199.89 y=1169.02)	1	1	90.296875	12.579362	4.7105794
b94	0	Fperrara_SingleCell_Microscopy	fp_hcp12_img2.tif	(x=240.77 y=849.90)	1	1	391.52344	35.257698	6.022114
b101	0	Fperrara_SingleCell_Microscopy	fp_hcp12_img2.tif	(x=256.35 y=70.09)	1	1	488.79053	31.127825	5.977117
b127	0	Fperrara_SingleCell_Microscopy	fp_hcp12_img2.tif	(x=329.55 y=1061.49)	1	1	215.48438	16.783985	5.8534904
b164	0	Fperrara_SingleCell_Microscopy	fp_hcp12_img2.tif	(x=401.06 y=2019.53)	1	1	296.34375	22.6283	5.302589
b170	0	Fperrara_SingleCell_Microscopy	fp_hcp12_img2.tif	(x=422.07 y=1845.93)	1	1	499.5625	39.19059	4.083989
b196	0	Fperrara_SingleCell_Microscopy	fp_hcp12_img2.tif	(x=460.03 y=972.68)	1	1	121.1875	13.508842	4.199729
b214	0	Fperrara_SingleCell_Microscopy	fp_hcp12_img2.tif	(x=508.89 y=308.55)	1	1	297.2422	19.967112	5.484666
b215	0	Fperrara_SingleCell_Microscopy	fp_hcp12_img2.tif	(x=512.08 y=1118.36)	1	1	286.34375	23.925179	4.5804625
b235	0	Fperrara_SingleCell_Microscopy	fp_hcp12_img2.tif	(x=548.58 y=1901.33)	1	1	258.25	20.442787	5.506248
b291	0	Fperrara_SingleCell_Microscopy	fp_hcp12_img2.tif	(x=633.13 y=1677.75)	1	1	630.5	31.786194	4.2539525
b329	0	Fperrara_SingleCell_Microscopy	fp_hcp12_img2.tif	(x=691.91 y=35.16)	1	1	414.7798	28.79483	4.412061
[truncated: 1,803 more rows]

## Sheet: Fig 6 - fig sup 4, ODtoCFU
replicate	strain	genotype	dilution	cfu
1	ESL868	wt	0	NA
1	ESL868	wt	-1	NA
1	ESL868	wt	-2	100
1	ESL868	wt	-3	13
1	ESL868	wt	-4	0
1	ESL868	wt	-5	0
1	ESL158	ihfa	0	NA
1	ESL158	ihfa	-1	315
1	ESL158	ihfa	-2	31
1	ESL158	ihfa	-3	2
1	ESL158	ihfa	-4	0
1	ESL158	ihfa	-5	0
1	ESL854	hcp1	0	NA
1	ESL854	hcp1	-1	NA
1	ESL854	hcp1	-2	177
1	ESL854	hcp1	-3	31
1	ESL854	hcp1	-4	2
1	ESL854	hcp1	-5	0
1	ESL855	hcp2	0	NA
1	ESL855	hcp2	-1	221
1	ESL855	hcp2	-2	53
1	ESL855	hcp2	-3	1
1	ESL855	hcp2	-4	0
1	ESL855	hcp2	-5	0
1	ESL856	hcp1_hcp2	0	NA
1	ESL856	hcp1_hcp2	-1	122
1	ESL856	hcp1_hcp2	-2	7
1	ESL856	hcp1_hcp2	-3	0
1	ESL856	hcp1_hcp2	-4	0
1	ESL856	hcp1_hcp2	-5	0
1	ESL888	clbB	0	NA
1	ESL888	clbB	-1	204
1	ESL888	clbB	-2	23
1	ESL888	clbB	-3	2
1	ESL888	clbB	-4	0
1	ESL888	clbB	-5	0
1	ESL921	pilE	0	NA
1	ESL921	pilE	-1	NA
1	ESL921	pilE	-2	79
1	ESL921	pilE	-3	6
1	ESL921	pilE	-4	0
1	ESL921	pilE	-5	0
1	ESL957	apeA_R	0	NA
1	ESL957	apeA_R	-1	NA
1	ESL957	apeA_R	-2	134
1	ESL957	apeA_R	-3	8
1	ESL957	apeA_R	-4	0
1	ESL957	apeA_R	-5	0
2	ESL868	wt	0	NA
2	ESL868	wt	-1	NA
2	ESL868	wt	-2	107
2	ESL868	wt	-3	28
2	ESL868	wt	-4	5
2	ESL868	wt	-5	0
2	ESL158	ihfa	0	NA
2	ESL158	ihfa	-1	0
2	ESL158	ihfa	-2	81
2	ESL158	ihfa	-3	17
2	ESL158	ihfa	-4	4
2	ESL158	ihfa	-5	0
2	ESL854	hcp1	0	NA
2	ESL854	hcp1	-1	NA
2	ESL854	hcp1	-2	64
2	ESL854	hcp1	-3	19
2	ESL854	hcp1	-4	0
2	ESL854	hcp1	-5	0
2	ESL855	hcp2	0	NA
2	ESL855	hcp2	-1	NA
2	ESL855	hcp2	-2	50
2	ESL855	hcp2	-3	4
2	ESL855	hcp2	-4	0
2	ESL855	hcp2	-5	0
2	ESL856	hcp1_hcp2	0	NA
2	ESL856	hcp1_hcp2	-1	183
2	ESL856	hcp1_hcp2	-2	21
2	ESL856	hcp1_hcp2	-3	3
2	ESL856	hcp1_hcp2	-4	0
2	ESL856	hcp1_hcp2	-5	0
2	ESL888	clbB	0	NA
2	ESL888	clbB	-1	NA
2	ESL888	clbB	-2	180
2	ESL888	clbB	-3	0
2	ESL888	clbB	-4	0
2	ESL888	clbB	-5	0
2	ESL921	pilE	0	NA
2	ESL921	pilE	-1	NA
2	ESL921	pilE	-2	58
2	ESL921	pilE	-3	0
2	ESL921	pilE	-4	0
2	ESL921	pilE	-5	0
2	ESL957	apeA_R	0	NA
2	ESL957	apeA_R	-1	NA
2	ESL957	apeA_R	-2	141
2	ESL957	apeA_R	-3	0
2	ESL957	apeA_R	-4	0
2	ESL957	apeA_R	-5	0
3	ESL868	wt	0	NA
3	ESL868	wt	-1	NA
3	ESL868	wt	-2	148
3	ESL868	wt	-3	21
3	ESL868	wt	-4	2
3	ESL868	wt	-5	0
3	ESL158	ihfa	0	NA
3	ESL158	ihfa	-1	NA
3	ESL158	ihfa	-2	129
3	ESL158	ihfa	-3	18
3	ESL158	ihfa	-4	1
3	ESL158	ihfa	-5	0
3	ESL854	hcp1	0	NA
3	ESL854	hcp1	-1	NA
3	ESL854	hcp1	-2	127
3	ESL854	hcp1	-3	19
3	ESL854	hcp1	-4	3
3	ESL854	hcp1	-5	0
3	ESL855	hcp2	0	NA
3	ESL855	hcp2	-1	NA
3	ESL855	hcp2	-2	94
3	ESL855	hcp2	-3	13
3	ESL855	hcp2	-4	0
3	ESL855	hcp2	-5	0
3	ESL856	hcp1_hcp2	0	NA
3	ESL856	hcp1_hcp2	-1	NA
3	ESL856	hcp1_hcp2	-2	56
3	ESL856	hcp1_hcp2	-3	7
3	ESL856	hcp1_hcp2	-4	0
3	ESL856	hcp1_hcp2	-5	0
3	ESL888	clbB	0	NA
3	ESL888	clbB	-1	NA
3	ESL888	clbB	-2	115
3	ESL888	clbB	-3	12
3	ESL888	clbB	-4	2
3	ESL888	clbB	-5	2
3	ESL921	pilE	0	NA
3	ESL921	pilE	-1	113
3	ESL921	pilE	-2	6
3	ESL921	pilE	-3	2
3	ESL921	pilE	-4	2
3	ESL921	pilE	-5	0
3	ESL957	apeA_R	0	NA
3	ESL957	apeA_R	-1	NA
3	ESL957	apeA_R	-2	NA
3	ESL957	apeA_R	-3	119
3	ESL957	apeA_R	-4	21
3	ESL957	apeA_R	-5	3
