# Supplementary material for: Integration host factor regulates colonization factors in the bee gut symbiont Frischella perrara
Source: eLife. 2023 Apr 14;12:e76182. doi: 10.7554/eLife.76182 (PMC10104596; doi:10.7554/eLife.76182)
Supplement: Figure 7—source data 1. [file elife-76182-fig7-data1.xlsx]

## Sheet: Figure 7 - qPCR_values
Sample_ID	Target	Ct	SD	Ct.sd
A1_1	Actin	24.7872581481934	0.233063022043116	24.7090930938721
A2_1	Actin	23.2763754526774	0.0249319580010592	23.2792434692383
A3_1	Actin	25.0996284484863	0.135686386364483	25.0458240509033
A4_1	Actin	24.1326459248861	0.133184200575131	24.1478786468506
B1_1	Actin	23.160514831543	0.139660028624433	23.2181186676025
B2_1	Actin	24.5360590616862	0.0654290705538037	24.5653953552246
B3_1	Actin	23.935692469279	0.0918795481400405	23.9796333312988
B4_1	Actin	24.4119103749593	0.0311711426480924	24.4084854125977
C1_1	Actin	23.4818312327067	0.0854814101857907	23.46169090271
C2_1	Actin	23.6484858194987	0.0537956395690463	23.6376876831055
C3_1	Actin	23.4104843139648	0.104542518377166	23.4555702209473
C4_1	Actin	24.4338938395182	0.0629109051980894	24.4325160980225
D1_1	Actin	23.3604996999105	0.179976968820625	23.4121417999268
D2_1	Actin	23.9204368591309	0.0358580004404704	23.9229412078857
D3_1	Actin	23.8390318552653	0.236019148365748	23.8112525939941
D4_1	Actin	23.4690704345703	0.189053263274593	23.4321117401123
E1_1	Actin	28.2528419494629	0.0386462018601781	28.2606830596924
E2_1	Actin	29.6974620819092	0.675435806009254	29.6499252319336
E3_1	Actin	24.7886479695638	0.211749565726328	24.6787376403809
E4_1	Actin	26.6177082061768	0.169228597183338	26.5686378479004
F1_1	Actin	25.0586516062419	0.0436821379619878	25.0430335998535
F2_1	Actin	24.9286473592122	0.0263552477477999	24.9390735626221
F3_1	Actin	25.8392365773519	0.706468713021662	25.4638786315918
F4_1	Actin	26.0835704803467	0.127880176190495	26.0508422851562
G1_1	Actin	24.6036497751872	0.241249209373267	24.6494083404541
G2_1	Actin	23.5266742706299	0.481851433576441	23.7747783660889
G3_1	Actin	23.9458395640055	0.0751018156344208	23.986686706543
G4_1	Actin	24.3951272964478	0.0705302221720705	24.3951272964478
H1_1	Actin	23.218422571818	0.154275565909405	23.2005233764648
H2_1	Actin	23.9116846720378	0.0588555894398951	23.9391231536865
H3_1	Actin	23.9905904134115	0.176383344190663	24.046516418457
H4_1	Actin	23.8796399434408	0.663121974908657	24.2003364562988
I1_1	Actin	23.4963696797689	0.0577417751507651	23.4939880371094
I2_1	Actin	24.5552101135254	0.10632334897625	24.5552101135254
I3_1	Actin	24.0492935180664	0.00799379915297823	24.0487976074219
I4_1	Actin	23.3343505859375	0.0148734542521005	23.3343505859375
J1_1	Actin	24.2164624532064	0.0617225189937481	24.2132263183594
J2_1	Actin	23.2684164047241	0.0693919200874883	23.2684164047241
J3_1	Actin	25.2088356018066	0.134110838910707	25.2222728729248
J4_1	Actin	24.1366882324219	0.0619835156436374	24.1366882324219
K1_1	Actin	24.5138715108236	0.100268133487957	24.5583972930908
K2_1	Actin	22.7310791015625	0.0198906150988373	22.7310791015625
K3_1	Actin	25.8750470479329	0.0503460183578783	25.8803081512451
K4_1	Actin	23.5619058609009	0.0103161998163145	23.5619058609009
L1_1	Actin	23.5292332967122	0.122698846021446	23.5635280609131
L2_1	Actin	23.1366548538208	0.144708675551244	23.1366548538208
L3_1	Actin	23.9074338277181	0.0835910178399221	23.9507427215576
L4_1	Actin	23.1402530670166	0.0297846720804667	23.1402530670166
M1_1	Actin	25.7568734486898	0.323980264604531	25.613899230957
M2_1	Actin	27.3543844223022	0.0952410880414017	27.3543844223022
M3_1	Actin	25.1329663594564	0.182664843087592	25.0681838989258
M4_1	Actin	26.9862623214722	0.0393051393968955	26.9862623214722
N1_1	Actin	25.5904642740885	0.099645595663592	25.5945835113525
N2_1	Actin	24.5100870132446	0.0387521727444326	24.5100870132446
N3_1	Actin	24.8589344024658	0.0865484271573442	24.8760738372803
N4_1	Actin	24.8460540771484	0.136027099107576	24.8460540771484
neg_actin	Actin	NA	NA	NA
O1_1	Actin	24.1312185923258	0.107923815794622	24.1874866485596
O2_1	Actin	24.6512622833252	0.104572737476502	24.6512622833252
O3_1	Actin	24.0700937906901	0.117287034092907	24.0170917510986
P1_1	Actin	24.2525281906128	0.194421726306814	24.2525281906128
P2_1	Actin	24.2406063079834	0.0615474244917288	24.2276344299316
P3_1	Actin	23.9864101409912	0.148073679936354	23.9864101409912
pos_actin	Actin	8.30548127492269	0.0425055522593693	8.29898357391357
A1_1	Fp	28.7005634307861	0.117079847141511	28.6806869506836
A2_1	Fp	30.2186991373698	0.265984235504661	30.2061290740967
A3_1	Fp	37.8002967834473	0.536582655160199	37.8002967834473
A4_1	Fp	17.6883252461751	0.168864015938028	17.7313861846924
B1_1	Fp	16.3796558380127	0.219733333061134	16.4478187561035
B2_1	Fp	32.6798718770345	0.343314899467762	32.669994354248
B3_1	Fp	17.1034164428711	0.376944979482721	17.3074321746826
B4_1	Fp	17.753412882487	0.0802377584518433	17.7429676055908
C1_1	Fp	17.9756183624268	0.0698817108799133	17.9705047607422
C2_1	Fp	15.7821168899536	0.200256324246302	15.7886753082275
C3_1	Fp	15.950657526652	0.278544365520079	16.0530967712402
C4_1	Fp	16.787099202474	0.159066668114104	16.731819152832
D1_1	Fp	16.8576933542887	0.231901189870806	16.9104881286621
D2_1	Fp	20.2521622975667	0.899723412881928	20.607946395874
D3_1	Fp	17.7825717926025	0.202478150731831	17.8302459716797
D4_1	Fp	17.5799954732259	0.146602384203874	17.6125240325928
E1_1	Fp	37.8509661356608	1.69409811712591	38.6582984924316
E2_1	Fp	34.2426312764486	4.4691483820365	36.6821441650391
E3_1	Fp	18.6027844746908	0.151893365212691	18.6777877807617
E4_1	Fp	20.6161111195882	0.719740609225419	20.5762004852295
F1_1	Fp	18.1948019663493	0.0745756706758555	18.2271614074707
F2_1	Fp	17.3236223856608	0.0216923701970394	17.3250904083252
F3_1	Fp	18.3801708221436	0.148946534935151	18.4465465545654
F4_1	Fp	18.4399325052897	0.184177698894276	18.4385108947754
G1_1	Fp	33.4394124348958	1.08834200391373	33.9693450927734
G2_1	Fp	32.2149689992269	1.1971154846798	31.8134326934814
G3_1	Fp	18.3388735453288	0.100370660230887	18.3037090301514
G4_1	Fp	33.4579696655273	0.400569043044146	33.4579696655273
H1_1	Fp	15.8267825444539	0.172735581551137	15.8926630020142
H2_1	Fp	16.7446072896322	0.0785331066727537	16.7041893005371
H3_1	Fp	18.166831334432	0.256186769826585	18.2962684631348
H4_1	Fp	34.5508689880371	NA	34.5508689880371
I1_1	Fp	22.3854745229085	0.0502415271545006	22.3929233551025
I2_1	Fp	33.1342703501383	1.95252645810196	32.4707908630371
I3_1	Fp	29.2551771799723	0.414930036352583	29.3041915893555
I4_1	Fp	32.1079921722412	0.985659011917715	32.1079921722412
J1_1	Fp	18.1057898203532	0.10744270767062	18.1489162445068
J2_1	Fp	16.3451226552327	0.0871967722018933	16.3187732696533
J3_1	Fp	17.8066412607829	0.166499749848402	17.7857112884521
J4_1	Fp	15.980975151062	0.154697141473538	15.980975151062
K1_1	Fp	32.0792032877604	0.647916530025559	32.0254211425781
K2_1	Fp	28.376353263855	0.421761152825	28.376353263855
K3_1	Fp	19.2315050760905	0.100319637749043	19.2606410980225
K4_1	Fp	15.2607984542847	0.149318529253972	15.2607984542847
L1_1	Fp	26.5337982177734	0.173179184845304	26.4886226654053
L2_1	Fp	30.3268032073975	0.618502641673853	30.3268032073975
L3_1	Fp	23.2952791849772	0.164527196817821	23.329460144043
L4_1	Fp	17.95103931427	0.161597086336953	17.95103931427
M1_1	Fp	35.3089904785156	NA	35.3089904785156
M2_1	Fp	35.3141593933105	NA	35.3141593933105
M3_1	Fp	18.8551273345947	0.0936196739830833	18.8464012145996
M4_1	Fp	35.2824630737305	0.53238550339809	35.2824630737305
N1_1	Fp	18.2475980122884	0.162804062062769	18.2643165588379
N2_1	Fp	17.552806854248	0.0791227844716835	17.552806854248
N3_1	Fp	33.6093692779541	1.73350729709841	33.6093692779541
N4_1	Fp	17.7590990066528	0.00582233424068895	17.7590990066528
neg_fp	Fp	NA	0	NA
O1_1	Fp	34.8524570465088	0.302710129948036	34.8524570465088
O2_1	Fp	36.5439262390137	0.405980024043369	36.5439262390137
O3_1	Fp	33.5155448913574	0.913855456892087	33.2100601196289
P1_1	Fp	35.436408996582	NA	35.436408996582
P2_1	Fp	34.7649180094401	0.978162174909962	34.8812141418457
pos_fp	Fp	8.45903078715006	0.0322371069918005	8.44239711761475
A5_1	Actin	25.922903696696	0.0524883514697746	25.900354385376
A6_1	Actin	25.39426612854	0.0207911607489251	25.3842353820801
A7_1	Actin	24.9568926493327	0.19648618610831	24.9816741943359
A8_1	Actin	25.1026039123535	0.124890537458118	25.1496486663818
B5_1	Actin	24.3978176116943	0.0503935161812792	24.39284324646
B6_1	Actin	24.1412347157796	0.0639951674303499	24.1486835479736
B7_1	Actin	25.082062403361	0.315389957523743	24.9747581481934
B8_1	Actin	23.9570204416911	0.102578734867344	23.9951114654541
C5_1	Actin	24.7520236968994	0.136847440880494	24.7435607910156
C6_1	Actin	24.2982444763184	0.103480724445374	24.3040103912354
C7_1	Actin	25.3760331471761	0.110344845833448	25.3135299682617
C8_1	Actin	23.6714038848877	0.0964970413553874	23.6308898925781
D5_1	Actin	24.2385292053223	0.0509801142136265	24.25537109375
D6_1	Actin	24.0829467773438	0.181320900898808	24.1251239776611
D7_1	Actin	25.2924149831136	0.0301607889403083	25.2788753509521
D8_1	Actin	24.6071211496989	0.11066056284653	24.5978927612305
E5_1	Actin	27.4994354248047	0.0621970745312233	27.4780502319336
E6_1	Actin	26.3204987843831	0.131207472559289	26.3627529144287
E7_1	Actin	26.7880872090658	0.211845421289916	26.7164859771729
E8_1	Actin	26.1419970194499	0.122264668896539	26.1135540008545
F5_1	Actin	26.727024714152	0.155102529067877	26.6469879150391
F6_1	Actin	26.1126950581868	0.0484217522037032	26.0996608734131
F7_1	Actin	26.2988789876302	0.232854996618438	26.4248313903809
F8_1	Actin	25.8104076385498	0.0396497485401087	25.829517364502
G5_1	Actin	25.6640090942383	0.0974024933565873	25.7109146118164
G6_1	Actin	25.1295134226481	0.0754691333010227	25.1631011962891
G7_1	Actin	25.0023695627848	0.0892761038002274	24.9827117919922
G8_1	Actin	24.34326171875	0.0911494768516436	24.3318328857422
H5_1	Actin	24.2964522043864	0.144425023027021	24.2741394042969
H6_1	Actin	25.8790384928385	0.0824454043200235	25.85471534729
H7_1	Actin	26.6012420654297	0.0562235706031207	26.5720138549805
H8_1	Actin	25.2528705596924	0.119437125249233	25.2851371765137
I5_1	Actin	24.7679424285889	0.0852933310866781	24.7502040863037
I6_1	Actin	23.6261068979899	0.0902405728979953	23.6325149536133
I7_1	Actin	25.571294148763	0.0343488061279057	25.5596027374268
I8_1	Actin	23.6091677347819	0.0760830320968346	23.5965900421143
J5_1	Actin	26.7956600189209	0.17327037988468	26.6964282989502
J6_1	Actin	24.2519677480062	0.0988586706963616	24.2564468383789
J7_1	Actin	24.9477742513021	0.0737855028286311	24.9873886108398
J8_1	Actin	23.9123369852702	0.0587479069838762	23.8813152313232
K5_1	Actin	24.6078128814697	0.0293039142700183	24.6050128936768
K6_1	Actin	24.8770701090495	0.0614815153667899	24.9047107696533
K7_1	Actin	25.4154020945231	0.0997595948010393	25.3978996276855
K8_1	Actin	24.5237166086833	0.220444237395071	24.6257667541504
L5_1	Actin	23.658109664917	0.219464313805459	23.700756072998
L6_1	Actin	24.3823146820068	0.140153589911679	24.3983001708984
L7_1	Actin	23.7885208129883	0.0813009773765388	23.779333114624
L8_1	Actin	24.6458950042725	0.118072995182759	24.7097911834717
M5_1	Actin	26.1310367584229	0.0551072441109108	26.1494426727295
M6_1	Actin	27.3404264450073	0.131248658010805	27.3404264450073
M7_1	Actin	26.050412495931	0.101972574396537	26.0430717468262
M8_1	Actin	26.9217205047607	0.0825889412932194	26.9217205047607
N5_1	Actin	24.8768100738525	0.0854872546733593	24.8508682250977
N6_1	Actin	24.5541076660156	0.127797336879945	24.5541076660156
N7_1	Actin	24.3580582936605	0.126054439047766	24.384370803833
N8_1	Actin	23.9374281565348	0.669443489548695	24.2447319030762
O5_1	Actin	24.3506679534912	0.200141724522893	24.4153175354004
O6_1	Actin	24.0613317489624	0.0536040478100955	24.0613317489624
O7_1	Actin	24.8077150980632	0.0713062802774976	24.8477745056152
P5_1	Actin	25.6409864425659	0.0479314191753172	25.6409864425659
P6_1	Actin	24.1736488342285	0.0558582305699791	24.1897468566895
P7_1	Actin	25.1103029251099	0.00714136201168588	25.1103029251099
posActin	Actin	8.87099202473958	0.0389666192862274	8.89196968078613
A5_1	Fp	30.1060600280762	0.428557722650226	29.9307727813721
A6_1	Fp	34.243771870931	0.411835231995045	34.4056701660156
A7_1	Fp	28.8537394205729	0.215836004540723	28.951208114624
A8_1	Fp	32.3392906188965	0.412569855865807	32.4706420898438
B5_1	Fp	17.1606426239014	0.100226002586254	17.1920833587646
B6_1	Fp	17.2460142771403	0.215907421237628	17.3486995697021
B7_1	Fp	17.1085631052653	0.104294741896728	17.0981578826904
B8_1	Fp	15.7338803609212	0.199775489014175	15.8108158111572
C5_1	Fp	16.5329697926839	0.187272399111562	16.5387573242188
C6_1	Fp	16.7580070495605	0.0382990363548699	16.7783145904541
C7_1	Fp	16.8768278757731	0.196871108665706	16.9326572418213
C8_1	Fp	27.7978210449219	0.182812399763793	27.8790111541748
D5_1	Fp	17.5677165985107	0.271767881728357	17.6495800018311
D6_1	Fp	18.4909826914469	0.112957393112043	18.5123119354248
D7_1	Fp	19.9456431070964	0.160213680071613	19.9659805297852
D8_1	Fp	18.2917353312174	0.191929858730317	18.3666572570801
E5_1	Fp	21.422295888265	0.159319136555105	21.4021949768066
E6_1	Fp	35.7057978312174	1.16967009762989	36.253475189209
E7_1	Fp	20.825855255127	0.0180650539190084	20.830997467041
E8_1	Fp	34.5191294352214	0.988268801034582	34.2302360534668
F5_1	Fp	20.5885022481283	0.179325748454265	20.6550216674805
F6_1	Fp	17.4895865122477	0.0704530908042844	17.5180797576904
F7_1	Fp	18.6118386586507	0.122307857745785	18.6393013000488
F8_1	Fp	16.9074516296387	0.0612246784494162	16.9182529449463
G5_1	Fp	32.6293576558431	0.388914802358652	32.7370910644531
G6_1	Fp	19.0922253926595	0.0571620565022165	19.1124591827393
G7_1	Fp	31.8870671590169	0.532428216714043	32.061450958252
G8_1	Fp	29.4211419423421	0.194424821182869	29.4609050750732
H5_1	Fp	16.1671708424886	0.584701413573466	15.864351272583
H6_1	Fp	16.5590070088704	0.0975031862473654	16.5257205963135
H7_1	Fp	28.8276049296061	0.229157097301158	28.8563861846924
H8_1	Fp	16.9939460754395	0.0732874709451696	17.0244140625
I5_1	Fp	31.7805957794189	0.507389968426761	31.8112964630127
I6_1	Fp	30.5386740366618	0.0640485538144373	30.5629425048828
I7_1	Fp	35.6976305643717	0.594016666396973	35.9143295288086
I8_1	Fp	33.4876689910889	0.675603866385989	33.4876689910889
J5_1	Fp	18.1908003489176	0.195686101051929	18.2786445617676
J6_1	Fp	16.8412240346273	0.157739792759974	16.8823585510254
J7_1	Fp	17.611390431722	0.177762095070521	17.7004776000977
J8_1	Fp	16.892422358195	0.247004466437187	16.8229713439941
K5_1	Fp	26.9347559611003	0.0536511449517142	26.9373226165771
K6_1	Fp	16.6437199910482	0.112864662453088	16.693639755249
K7_1	Fp	19.1680393218994	0.231838855413025	19.2564239501953
K8_1	Fp	19.7000980377197	0.146476820139973	19.7000980377197
L5_1	Fp	25.8361066182454	0.190396486865981	25.9032249450684
L6_1	Fp	33.2949358622233	0.625745226688347	33.2618217468262
L7_1	Fp	31.5582358042399	0.369655153665955	31.6301670074463
L8_1	Fp	17.8884201049805	0.125005529634583	17.8884201049805
M5_1	Fp	27.8628025054932	0.20067680808698	27.8275032043457
M6_1	Fp	29.7745151519775	0.0125294151253186	29.7745151519775
M7_1	Fp	35.7813243865967	0.994803192170639	35.7813243865967
M8_1	Fp	34.1616516113281	NA	34.1616516113281
N5_1	Fp	16.9153251647949	0.208428681122088	16.9685153961182
N6_1	Fp	16.8382155100505	0.876700656574683	17.2414684295654
N7_1	Fp	16.1605803171794	0.242787410338827	16.1924858093262
N8_1	Fp	15.9023823738098	0.0976033346067403	15.9023823738098
O6_1	Fp	34.2775478363037	0.088525914961858	34.2775478363037
O7_1	Fp	35.2060546875	NA	35.2060546875
P5_1	Fp	35.0088119506836	NA	35.0088119506836
P6_1	Fp	34.2727444966634	1.12296596358944	34.0489044189453
P7_1	Fp	35.4981117248535	0.681055308359782	35.4981117248535
posFp	Fp	8.85579776763916	0.0709594491947998	8.86669826507568
A1_2	Actin	24.2434228261312	0.0599303494359063	24.2768478393555
A10_1	Actin	24.0368623733521	0.00563891115596953	24.0368623733521
A2_2	Actin	23.1858113606771	0.0219373021490055	23.1984004974365
A9_1	Actin	24.4456780751546	0.140409053717322	24.3808155059814
Actin_neg	Actin	10.5140562057495	NA	10.5140562057495
Actin_pos	Actin	8.02821652094523	0.0677985218675814	7.99178075790405
B1_2	Actin	24.4139353434245	0.0208888869193611	24.415828704834
B2_2	Actin	24.1933002471924	0.121147144650833	24.1773929595947
B9_1	Actin	23.3716049194336	0.0125976903204771	23.3734836578369
C1_2	Actin	23.338862101237	0.0321835331048116	23.3467597961426
C10_1	Actin	22.7200870513916	0.0468383923339924	22.7002925872803
C2_2	Actin	24.6687984466553	0.118253315134137	24.6877460479736
C9_1	Actin	23.7824668884277	0.190711674797025	23.7126388549805
D1_2	Actin	23.0499521891276	0.0402418273757524	23.0630035400391
D10_1	Actin	24.2518507639567	0.173719422759125	24.3270435333252
D9_1	Actin	23.4433790842692	0.0947167468564433	23.4798126220703
E1_2	Actin	23.9607302347819	0.0763466667246149	23.9881954193115
E10_1	Actin	27.4399681091309	0.0974609130735895	27.4459438323975
E2_2	Actin	22.8563048044841	0.127504756384175	22.921236038208
E9_1	Actin	24.7518266042074	0.191864477826565	24.6917171478271
F1_2	Actin	23.9595222473145	0.062521621221119	23.9770812988281
F10_1	Actin	25.6847483317057	0.130156058496288	25.6958599090576
F2_2	Actin	23.4620978037516	0.172043096731784	23.4790916442871
F9_1	Actin	24.453763961792	0.19810346256228	24.4810905456543
G1_2	Actin	24.1323216756185	0.0307556491999746	24.1491317749023
G2_2	Actin	23.3257376352946	0.0408087596923836	23.3211860656738
G9_1	Actin	22.7011540730794	0.0191872652873732	22.7053909301758
H1_2	Actin	24.0738124847412	0.156342327011104	24.1179351806641
H10_1	Actin	24.7556304931641	0.0756835403701763	24.7921562194824
H2_2	Actin	23.3529135386149	0.071924049590849	23.3908348083496
H9_1	Actin	24.1866149902344	0.110927470559486	24.1668376922607
I1_2	Actin	23.3709818522135	0.079916726659759	23.4149932861328
I10_1	Actin	23.2276401519775	0.0667787814548649	23.2145099639893
I2_2	Actin	22.4817460378011	0.0591718589698668	22.4840469360352
I9_1	Actin	24.1459560394287	0.060522235482932	24.1580791473389
J1_2	Actin	23.8256568908691	0.107479372828074	23.7836799621582
J10_1	Actin	23.6689459482829	0.102481345453508	23.6886520385742
J2_2	Actin	23.1295102437337	0.0959999615537078	23.120231628418
J9_1	Actin	24.218282699585	0.102536517846799	24.2411441802979
K1_2	Actin	24.5883769989014	0.0500595196201757	24.5929317474365
K10_1	Actin	23.5902818044027	0.111484744955808	23.6493682861328
K2_2	Actin	23.331236521403	0.0445426242643064	23.3437671661377
K9_1	Actin	24.3223438262939	0.0891579573966052	24.3180885314941
L1_2	Actin	23.4911321004232	0.141076215819264	23.5059242248535
L10_1	Actin	23.4373410542806	0.107751214400187	23.3764400482178
L2_2	Actin	23.1897869110107	0.057804639192407	23.2170028686523
L9_1	Actin	23.2630373636882	0.176584117529086	23.2510948181152
M1_2	Actin	24.2913303375244	0.0483605420362568	24.317024230957
M10_1	Actin	25.4005521138509	0.0932473521894003	25.4105205535889
M2_2	Actin	22.7744874954224	0.033260269796069	22.7744874954224
M9_1	Actin	25.4784863789876	0.0236456434249708	25.4758682250977
N1_2	Actin	24.8197135925293	0.0993612047740044	24.8188762664795
N10_1	Actin	24.430295308431	0.048096416421404	24.4049186706543
N2_2	Actin	23.1721096038818	0.147280877974951	23.1459980010986
N9_1	Actin	22.791056950887	0.0729817265929776	22.7806224822998
O1_2	Actin	24.1948324839274	0.0677824990518604	24.1605854034424
O10_1	Actin	23.4154167175293	0.03808950807114	23.4174270629883
O9_1	Actin	23.6100978851318	0.22397445032657	23.6626529693604
P1_2	Actin	23.6214783986409	0.195892996518116	23.6613464355469
P10_1	Actin	23.7841962178548	0.162792786733302	23.7728614807129
P9_1	Actin	24.591796875	0.262103495869124	24.591796875
A1_2	Fp	24.3078931172689	0.233242001520586	24.3691730499268
A10_1	Fp	32.0407676696777	0.194590313700857	32.0407676696777
A2_2	Fp	31.232208887736	0.424151499965869	30.991735458374
A9_1	Fp	34.3395900726318	1.00216169474585	34.3395900726318
B1_2	Fp	17.5850251515706	0.0617942760115156	17.566291809082
B2_2	Fp	17.1741091410319	0.197914189647643	17.2148361206055
B9_1	Fp	18.9129473368327	0.0731506731924169	18.9106636047363
C1_2	Fp	17.4078960418701	0.243381803255016	17.4534854888916
C10_1	Fp	28.1057294209798	0.155379710471545	28.0909404754639
C2_2	Fp	18.8430213928223	0.25304288955413	18.9743061065674
C9_1	Fp	17.8134708404541	0.461906290640274	17.5721855163574
D1_2	Fp	17.2068570454915	0.129673603184483	17.2125301361084
D10_1	Fp	17.7100340525309	0.174274079740385	17.7656574249268
D9_1	Fp	29.6114743550618	0.202286439119362	29.6407508850098
E1_2	Fp	19.6859334309896	0.394320566060229	19.4795265197754
E10_1	Fp	20.5833606719971	0.132919268128567	20.5446624755859
E2_2	Fp	19.5032704671224	0.184594848177036	19.5809764862061
E9_1	Fp	33.7064552307129	0.114585479983538	33.7064552307129
F1_2	Fp	17.4073219299316	0.203841151379467	17.4729099273682
F10_1	Fp	18.1694717407227	0.139972326809836	18.2128372192383
F2_2	Fp	18.0905615488688	0.192600612401035	18.1283798217773
F9_1	Fp	16.682346979777	0.0998902123971235	16.7216625213623
Fp_neg	Fp	NA	NA	NA
Fp_pos	Fp	8.89910411834717	0.0774523284417477	8.94222831726074
G2_2	Fp	31.8761987686157	0.0941810105076557	31.8761987686157
G9_1	Fp	28.6987934112549	0.230747469536906	28.6394176483154
H1_2	Fp	30.8781706492106	0.234130931008812	30.8283061981201
H10_1	Fp	33.9706764221191	0.243959040854165	33.982608795166
H2_2	Fp	27.3219629923503	0.263378501657011	27.4053707122803
H9_1	Fp	33.3798611958822	0.137823063896198	33.3828773498535
I1_2	Fp	32.8196538289388	1.06564462776678	32.3191833496094
I10_1	Fp	32.1753648122152	0.631605078555428	32.3527717590332
I2_2	Fp	27.8883183797201	0.294452317942251	27.9678955078125
I9_1	Fp	29.7901039123535	0.253424842721778	29.9305000305176
J1_2	Fp	18.2532908121745	0.230727018750744	18.3102397918701
J10_1	Fp	18.0811258951823	0.203021522092251	18.1595687866211
J2_2	Fp	17.3834005991618	0.179661151765815	17.4306411743164
J9_1	Fp	18.0376771291097	0.160296738318973	18.1243762969971
K1_2	Fp	19.8562990824382	0.147138358955867	19.9282093048096
K10_1	Fp	17.0898310343424	0.166590311312041	17.1666526794434
K2_2	Fp	17.1331621805827	0.31692924281697	17.3001251220703
K9_1	Fp	32.4682369232178	0.292994101254517	32.4682369232178
L1_2	Fp	23.5510495503743	0.16706060293256	23.5360164642334
L10_1	Fp	29.7843443552653	0.0780738318025199	29.7583122253418
L2_2	Fp	18.8956476847331	0.129295933036846	18.9378700256348
L9_1	Fp	17.6767018636068	0.185385941460183	17.6962623596191
M1_2	Fp	18.1024703979492	0.112948521840176	18.1246814727783
M10_1	Fp	35.6537418365479	1.86685587968942	35.6537418365479
M2_2	Fp	30.8194421132406	0.516909805399971	30.8109226226807
M9_1	Fp	32.3549156188965	0.715952160265242	32.0867347717285
N1_2	Fp	24.9723669687907	0.248883748914009	24.9969882965088
N10_1	Fp	33.0394592285156	0.330211032581178	32.9801292419434
N2_2	Fp	16.1960926055908	0.214288564781662	16.2464942932129
N9_1	Fp	16.8745047251383	0.059911208221208	16.8782157897949
O1_2	Fp	35.0055046081543	1.0235493659038	35.0055046081543
O10_1	Fp	35.2138118743896	0.829069645533432	35.2138118743896
O9_1	Fp	36.3175086975098	NA	36.3175086975098
P1_2	Fp	34.9162139892578	1.14699310191996	34.9162139892578
P10_1	Fp	33.9116134643555	0.476392909389185	33.9116134643555
P9_1	Fp	36.2841720581055	NA	36.2841720581055
A3_2	Actin	24.6325149536133	0.0823526523532162	24.6376094818115
A4_2	Actin	24.7279815673828	0.513042696075825	24.548152923584
A5_2	Actin	23.6853904724121	0.162741323876104	23.61279296875
A6_2	Actin	25.4021956125895	0.116240046314565	25.3358573913574
Actin_pos	Actin	8.97403653462728	0.10454755707923	9.00158977508545
B3_2	Actin	23.8755880991618	0.131450305446816	23.8396797180176
B4_2	Actin	23.4929231007894	0.117050823608012	23.5074672698975
B5_2	Actin	23.2780755360921	0.17220155481894	23.221736907959
B6_2	Actin	24.1597531636556	0.0336862436999072	24.1739158630371
C3_2	Actin	24.077691078186	0.0978359852105204	24.077691078186
C4_2	Actin	24.3944028218587	0.0383537763793712	24.3863773345947
C5_2	Actin	24.8009465535482	0.224732906579343	24.8675441741943
C6_2	Actin	24.446569442749	0.132222897247229	24.4111347198486
D3_2	Actin	23.8981844584147	0.0439933389556211	23.9002285003662
D4_2	Actin	23.5088888804118	0.0759173006013162	23.5284156799316
D5_2	Actin	24.0578397115072	0.117704448401265	24.0076236724854
D6_2	Actin	23.3175322214762	0.094004508481127	23.2976722717285
E3_2	Actin	24.7802581787109	0.216234200987232	24.8745727539062
E4_2	Actin	24.6290696461995	0.0362173731071262	24.6325225830078
E5_2	Actin	24.3186683654785	0.113823153344532	24.3764533996582
E6_2	Actin	24.2650623321533	0.18852235101486	24.1608257293701
F3_2	Actin	23.3841711680094	0.204700983429809	23.3440704345703
F4_2	Actin	24.2991905212402	0.127734255492176	24.2604484558105
F5_2	Actin	23.3219890594482	0.140933797691359	23.385066986084
F6_2	Actin	23.3291149139404	0.209792154059849	23.3292121887207
G3_2	Actin	24.2418130238851	0.150232902599484	24.1678485870361
G4_2	Actin	24.1561177571615	0.0355203561928079	24.1761150360107
G5_2	Actin	24.1640599568685	0.0497773754716874	24.1920547485352
G6_2	Actin	22.7575327555339	0.104295065040377	22.8010692596436
H3_2	Actin	24.7427419026693	0.131355855307265	24.6680335998535
H4_2	Actin	24.2008145650228	0.0439597353816597	24.2140483856201
H5_2	Actin	21.4938831329346	0.109252196248219	21.4710788726807
H6_2	Actin	23.5481796264648	0.110693443542537	23.5809078216553
I3_2	Actin	24.0166721343994	0.133362836651097	23.9695529937744
I4_2	Actin	23.6310717264811	0.105516262521709	23.6226787567139
I5_2	Actin	24.8471946716309	0.117814601948163	24.8038425445557
I6_2	Actin	25.0453942616781	0.0681610054404384	25.0691661834717
J3_2	Actin	25.466942469279	0.0487809012954714	25.4439868927002
J4_2	Actin	23.3973687489827	0.103456386870087	23.3985023498535
J5_2	Actin	25.3928337097168	0.201861302492296	25.3509578704834
J6_2	Actin	24.4043235778809	0.156250624124577	24.3912506103516
K3_2	Actin	24.6449642181396	0.119814275383395	24.6648712158203
K4_2	Actin	23.0366414388021	0.105171131946436	23.0484199523926
K5_2	Actin	24.931489944458	0.0489767817601272	24.9544773101807
K6_2	Actin	23.872922261556	0.147511734387379	23.8039627075195
L3_2	Actin	24.6627591451009	0.109418543739994	24.66139793396
L4_2	Actin	24.3095518747966	0.141759902350984	24.3695106506348
L5_2	Actin	23.4248905181885	0.100992266788537	23.442045211792
L6_2	Actin	23.8199551900228	0.110729599108977	23.836669921875
M3_2	Actin	24.6459197998047	0.0827433234203565	24.6067371368408
M4_2	Actin	23.7790654500326	0.113233224719174	23.7685222625732
M5_2	Actin	25.4325269063314	0.457119441596773	25.1822280883789
M6_2	Actin	23.999662399292	0.0914929912864309	23.9888973236084
N3_2	Actin	24.2954037984212	0.192382057175423	24.3046073913574
N4_2	Actin	23.574634552002	0.143495472264077	23.577938079834
N5_2	Actin	24.5746008555094	0.208370361912719	24.5658016204834
N6_2	Actin	24.0288174947103	0.0514959064980359	24.0214385986328
O3_2	Actin	25.2098890940348	0.123753521138917	25.219518661499
O4_2	Actin	23.3056812286377	0.114698770712335	23.3056812286377
O5_2	Actin	23.995200475057	0.134983356855165	23.9325428009033
P3_2	Actin	23.5726909637451	0.478291836056723	23.8242149353027
P4_2	Actin	23.2589861551921	0.166933212715774	23.2891616821289
P5_2	Actin	23.4627819061279	0.329000458708306	23.5718593597412
A3_2	Fp	29.675360361735	0.301373456751265	29.7000751495361
A4_2	Fp	32.5486555099487	1.27090213914368	32.5486555099487
A5_2	Fp	31.5972423553467	0.271615755472115	31.4629554748535
A6_2	Fp	24.5698426564534	0.100775158529006	24.5911903381348
B3_2	Fp	19.1572615305583	0.0910289904116819	19.1329936981201
B4_2	Fp	16.7432994842529	0.11476403283853	16.7613277435303
B5_2	Fp	16.4694430033366	0.0776202220288735	16.5126781463623
B6_2	Fp	17.6506443023682	0.189091480717838	17.7334442138672
C3_2	Fp	16.0717124938965	0.0420933704045899	16.0663833618164
C4_2	Fp	17.5904528299967	0.0714831094021662	17.5631275177002
C5_2	Fp	19.5873495737712	0.0696917865410994	19.6098709106445
C6_2	Fp	19.8247979482015	0.0259255755371576	19.8188285827637
D3_2	Fp	18.5597604115804	0.123056018198087	18.5390377044678
D4_2	Fp	17.0775241851807	0.208962513739955	17.1959648132324
D5_2	Fp	25.5883585611979	0.219294587004005	25.5359077453613
D6_2	Fp	18.612725575765	0.228940806026882	18.6958179473877
E3_2	Fp	20.7995567321777	0.047746940963665	20.7838439941406
E4_2	Fp	20.2969932556152	0.0504326081143526	20.3174858093262
E5_2	Fp	18.0040823618571	0.165655714952299	17.9375686645508
E6_2	Fp	28.8372637430827	0.154502910333304	28.8515605926514
F3_2	Fp	17.6052589416504	0.231326763309023	17.6373844146729
F4_2	Fp	17.9225012461344	0.167081888510112	17.9614486694336
F5_2	Fp	19.6374575297038	0.26867080775109	19.7798099517822
F6_2	Fp	18.9983100891113	0.122907962469205	18.9870491027832
G3_2	Fp	32.5360412597656	0.447293300431591	32.742977142334
G4_2	Fp	34.787202835083	1.38702648486005	34.787202835083
G5_2	Fp	31.5864582061768	0.0808209888305918	31.5574131011963
G6_2	Fp	35.007984161377	0.0493408097895215	35.007984161377
H3_2	Fp	28.708397547404	0.239928520521893	28.6451377868652
H4_2	Fp	18.8511288960775	0.171604130591481	18.9235172271729
H5_2	Fp	23.6185111999512	0.136430639494573	23.5800285339355
H6_2	Fp	20.7991364796956	0.196777388206975	20.8070774078369
I3_2	Fp	31.088978767395	0.330562116143187	31.088978767395
I4_2	Fp	33.2451267242432	0.027812873919733	33.2451267242432
I5_2	Fp	25.3430379231771	0.0340407849882516	25.3421382904053
I6_2	Fp	30.802300453186	0.00546088286785952	30.802300453186
J3_2	Fp	26.2320105234782	0.320643848529335	26.246524810791
J4_2	Fp	20.921854019165	0.154781727158683	20.9749393463135
J5_2	Fp	20.6438986460368	0.343269516639034	20.8022518157959
J6_2	Fp	17.00368309021	0.18946486687597	17.0269355773926
K3_2	Fp	31.9085941314697	0.528845516021506	31.9105052947998
K4_2	Fp	16.750316619873	0.0401114706418817	16.7307205200195
K5_2	Fp	20.3411769866943	0.202077784119641	20.227466583252
K6_2	Fp	20.560110727946	0.174086958023605	20.6031112670898
L3_2	Fp	35.0538368225098	NA	35.0538368225098
L4_2	Fp	20.0344886779785	0.106113456516666	20.0592784881592
L5_2	Fp	18.883518854777	0.205715873899429	18.9022922515869
L6_2	Fp	19.0948950449626	0.110382995605188	19.0866069793701
M3_2	Fp	34.8138745625814	1.45621480160938	35.2147483825684
M4_2	Fp	18.9790941874186	0.407366997668128	19.0877132415771
M5_2	Fp	22.2365029652913	0.0928380571996719	22.2871952056885
M6_2	Fp	17.2404848734538	0.0625968543977276	17.2045459747314
N3_2	Fp	33.3698450724284	0.912539441626417	33.7086143493652
N4_2	Fp	34.189261118571	1.07311369218849	34.1874046325684
N5_2	Fp	26.0827700297038	0.267620837539277	26.22900390625
N6_2	Fp	17.1331017812093	0.150820448982656	17.1477928161621
O3_2	Fp	35.6191775004069	0.840381886686912	35.9811134338379
O4_2	Fp	21.1435861587524	0.0039287606307915	21.1435861587524
O5_2	Fp	35.3449592590332	NA	35.3449592590332
P3_2	Fp	35.3791370391846	1.32029824559845	35.3791370391846
P4_2	Fp	29.8588631947835	0.504195157730595	29.9388542175293
P5_2	Fp	30.2450091044108	1.02310124428613	30.0802021026611
A10_2	Actin	24.1702416737874	0.0219986665884707	24.1593170166016
A7_2	Actin	23.7946618398031	0.0860903106805681	23.7771530151367
A8_2	Actin	23.8232644399007	0.0248814857580277	23.8184680938721
A9_2	Actin	24.9668992360433	0.0228953641383304	24.9608612060547
Actin_neg	Actin	NA	NA	NA
Actin_pos	Actin	9.1175324122111	0.149696823678558	9.17499732971191
B10_2	Actin	24.140775680542	0.114653993038689	24.1729373931885
B7_2	Actin	25.0671304066976	0.0814763393234848	25.0525646209717
B8_2	Actin	23.7914161682129	0.0707772003204485	23.8040580749512
B9_2	Actin	24.7028700510661	0.136303579602415	24.6780548095703
C7_2	Actin	24.6029415130615	0.0836439764381041	24.6176147460938
C8_2	Actin	23.8838036855062	0.0743418608988959	23.8715362548828
D10_2	Actin	24.6037527720133	0.070950539141108	24.635555267334
D7_2	Actin	23.9884707132975	0.0477246893638499	23.9692192077637
D8_2	Actin	24.092160542806	0.109660019504692	24.1232376098633
D9_2	Actin	23.7746181488037	0.0747234619421473	23.811637878418
E10_2	Actin	24.1958026885986	0.0517882578992032	24.1972045898438
E7_2	Actin	24.593074798584	0.0553863896319312	24.6181983947754
E8_2	Actin	24.04035059611	0.0626193827108285	24.0684375762939
E9_2	Actin	24.2800388336182	0.0647876657025406	24.2678165435791
F7_2	Actin	23.8119646708171	0.173900780752425	23.8687725067139
F8_2	Actin	23.8778196970622	0.0768873041338732	23.8905124664307
G10_2	Actin	23.8391729990641	0.103618618496638	23.8336219787598
G7_2	Actin	24.7135276794434	0.0404994363399971	24.731595993042
G8_2	Actin	24.0892607371012	0.0562727370050179	24.1016712188721
G9_2	Actin	24.716822942098	0.0868545794451636	24.7633857727051
H7_2	Actin	23.9465834299723	0.123518197245458	23.8818073272705
I10_2	Actin	23.5284385681152	0.078439806164161	23.5658645629883
I7_2	Actin	24.2042427062988	0.0722938940466242	24.2246131896973
I8_2	Actin	23.9275677998861	0.119262372601006	23.985897064209
I9_2	Actin	24.353702545166	0.0922697536881533	24.3367004394531
J10_2	Actin	24.1581420898438	0.175070287547194	24.1738567352295
J7_2	Actin	25.7815596262614	0.157571609439583	25.8267478942871
J8_2	Actin	24.0398998260498	0.176542885265709	24.0627403259277
J9_2	Actin	25.1014830271403	0.140059736980506	25.1112174987793
K10_2	Actin	24.384952545166	0.0500474446966124	24.4040946960449
K7_2	Actin	23.3088874816895	0.0934729872572651	23.3471240997314
K8_2	Actin	23.190559387207	0.112368156998833	23.2210731506348
K9_2	Actin	25.8386758168538	0.106327363678701	25.8255977630615
L10_2	Actin	24.6549708048503	0.219074309766525	24.5800113677979
L7_2	Actin	24.2641455332438	0.105338649128957	24.2778816223145
L8_2	Actin	24.5759302775065	0.138166588429584	24.5093040466309
L9_2	Actin	24.039363861084	0.255682176277626	23.9673442840576
M10_2	Actin	24.8066533406576	0.0374618992375251	24.8008213043213
M7_2	Actin	23.8032614390055	0.165001344699336	23.8820400238037
M8_2	Actin	24.7843767801921	0.0975382248927736	24.7794666290283
M9_2	Actin	25.2014083862305	0.184885097661969	25.1293716430664
N10_2	Actin	25.0333811442057	0.0990163231724222	24.9803619384766
N7_2	Actin	25.2643553415934	0.0992606628674912	25.3111343383789
N8_2	Actin	24.10546875	0.0457218715220198	24.1213302612305
N9_2	Actin	24.8359553019206	0.110679649150242	24.7990322113037
O4_1	Actin	25.5353298187256	0.0519688712938971	25.5339546203613
O7_2	Actin	25.9530982971191	0.169402432717521	25.9833583831787
O8_1	Actin	23.9309736887614	0.0591926381210535	23.9588356018066
O8_2	Actin	23.8285274505615	0.0403545917944539	23.8258895874023
O9_2	Actin	25.5238780975342	0.00822203264248833	25.5267448425293
P2_2	Actin	23.4206390380859	0.0976230812554952	23.3962917327881
P4_1	Actin	24.5710131327311	0.094316361607676	24.5314884185791
P7_2	Actin	23.8815212249756	0.00477709239761877	23.8815212249756
P8_1	Actin	24.085604985555	0.0834260645296767	24.1268520355225
P8_2	Actin	24.1629918416341	0.248120634507635	24.1074352264404
P9_2	Actin	24.582545598348	0.0740672977160968	24.5477600097656
A10_2	Fp	26.0771001180013	0.17672582222848	26.1106357574463
A7_2	Fp	30.2780494689941	0.0359203548392242	30.2816123962402
A8_2	Fp	31.0105953216553	0.383580872191418	31.1318855285645
A9_2	Fp	29.2192598978678	0.0957546556942301	29.1802959442139
B10_2	Fp	19.1329275767008	0.197304328964111	19.1635761260986
B7_2	Fp	17.1999746958415	0.178619323158194	17.1582908630371
B8_2	Fp	25.4588724772135	0.178148388966802	25.4560871124268
B9_2	Fp	19.7595564524333	0.16736457065782	19.7969608306885
C7_2	Fp	21.3351389567057	0.108523452810772	21.3497867584229
C8_2	Fp	18.1744791666667	0.13814295971135	18.1811676025391
D10_2	Fp	18.1113878885905	0.195858493454716	18.143274307251
D7_2	Fp	31.6727460225423	0.258315694180025	31.6190891265869
D8_2	Fp	19.0264377593994	0.182080305430903	19.0828704833984
D9_2	Fp	15.6326859792074	0.0600509478646714	15.6390466690063
E10_2	Fp	19.7112375895182	0.181413722478011	19.6592636108398
E7_2	Fp	18.8710187276204	0.113737560382898	18.9039897918701
E8_2	Fp	18.8429171244303	0.217500678887298	18.9620590209961
E9_2	Fp	18.2220147450765	0.484537769543649	18.1066932678223
F7_2	Fp	17.4628766377767	0.185948503635025	17.5309085845947
F8_2	Fp	18.6875387827555	0.121789636428819	18.7333431243896
Fp_neg	Fp	NA	0	NA
Fp_pos	Fp	9.22790749867757	0.0786465552884012	9.243577003479
G10_2	Fp	33.9293632507324	0.075073989616333	33.9293632507324
G7_2	Fp	18.9679069519043	0.0654952684775255	18.9583568572998
G8_2	Fp	17.6128743489583	0.100369144253884	17.6353759765625
G9_2	Fp	36.1542320251465	NA	36.1542320251465
H7_2	Fp	28.2559700012207	0.210219850039121	28.3746719360352
I10_2	Fp	26.4620469411214	0.181599220291986	26.561731338501
I7_2	Fp	27.7910804748535	0.579932543314988	27.7910804748535
I8_2	Fp	29.5036067962646	NA	29.5036067962646
I9_2	Fp	23.5803594589233	0.352567491512907	23.5803594589233
J10_2	Fp	17.8686815897624	0.310526473212917	17.9874801635742
J7_2	Fp	26.6336441040039	6.51755224320792	30.0246353149414
J8_2	Fp	16.7472248077393	0.143484645383458	16.6894569396973
J9_2	Fp	18.7267684936523	0.38202542540727	18.8771286010742
K10_2	Fp	22.9466813405355	0.141753028770919	23.0119285583496
K7_2	Fp	34.3577842712402	NA	34.3577842712402
K8_2	Fp	29.0710649490356	1.56486190899128	29.0710649490356
K9_2	Fp	18.8882074356079	0.048557215582007	18.8882074356079
L10_2	Fp	20.9556872049967	0.114157410344907	20.9629077911377
L7_2	Fp	25.318504969279	0.149790845994842	25.2473049163818
L8_2	Fp	19.8598988850911	0.126822040101619	19.9203338623047
L9_2	Fp	19.1907539367676	0.109788035761537	19.240421295166
M10_2	Fp	34.5298156738281	1.20476597880997	34.5298156738281
M7_2	Fp	27.2093448638916	0.118131491846605	27.1527061462402
M8_2	Fp	34.7995300292969	NA	34.7995300292969
M9_2	Fp	20.273717880249	0.0317734040267203	20.2790431976318
N10_2	Fp	33.7923049926758	0.439988821868991	33.7923049926758
N7_2	Fp	32.1984799702962	0.814757895596225	31.8267841339111
N8_2	Fp	18.8350721995036	0.1950844902905	18.9306831359863
N9_2	Fp	18.3458824157715	0.00107895932187889	18.3458824157715
O4_1	Fp	35.6287536621094	NA	35.6287536621094
O7_2	Fp	35.0729846954346	0.130168349989774	35.0729846954346
O9_2	Fp	27.1010176340739	0.100314360636207	27.1574554443359
P2_2	Fp	33.5472857157389	0.330388767281011	33.7346267700195
P4_1	Fp	35.254768371582	0.379486177894633	35.254768371582
P7_2	Fp	32.4736239115397	0.562962391578008	32.2720527648926
P8_1	Fp	17.2081750233968	0.31343756862365	17.1071548461914
P8_2	Fp	27.1376520792643	0.184842317901813	27.1616325378418
P9_2	Fp	34.0744450887044	0.0345310042453768	34.0734024047852

## Sheet: Figure 7 - scab_quantification
date	experiment	bee	scab	scab2	bacteria	community	Sample_ID
20221010	1st	A1	no	0	ESL0158	mono	A1_1
20221010	1st	A2	no	0	ESL0158	mono	A2_1
20221010	1st	A3	no	0	ESL0158	mono	A3_1
20221010	1st	A4	no	0	ESL0158	mono	A4_1
20221010	1st	A5	no	0	ESL0158	mono	A5_1
20221010	1st	A6	no	0	ESL0158	mono	A6_1
20221010	1st	A7	no	0	ESL0158	mono	A7_1
20221010	1st	A8	no	0	ESL0158	mono	A8_1
20221010	1st	A9	no	0	ESL0158	mono	A9_1
20221010	1st	A10	no	0	ESL0158	mono	A10_1
20221010	1st	B1	yes	1	ESL0868	mono	B1_1
20221010	1st	B2	yes	1	ESL0868	mono	B2_1
20221010	1st	B3	yes	1	ESL0868	mono	B3_1
20221010	1st	B4	yes	1	ESL0868	mono	B4_1
20221010	1st	B5	yes	1	ESL0868	mono	B5_1
20221010	1st	B6	yes	1	ESL0868	mono	B6_1
20221010	1st	B7	yes	1	ESL0868	mono	B7_1
20221010	1st	B8	yes	1	ESL0868	mono	B8_1
20221010	1st	B9	yes	1	ESL0868	mono	B9_1
20221010	1st	C1	yes	1	ESL0854	mono	C1_1
20221010	1st	C2	yes	1	ESL0854	mono	C2_1
20221010	1st	C3	yes	1	ESL0854	mono	C3_1
20221010	1st	C4	yes	1	ESL0854	mono	C4_1
20221010	1st	C5	yes	1	ESL0854	mono	C5_1
20221010	1st	C6	yes	1	ESL0854	mono	C6_1
20221010	1st	C7	yes	1	ESL0854	mono	C7_1
20221010	1st	C8	no	0	ESL0854	mono	C8_1
20221010	1st	C9	no	0	ESL0854	mono	C9_1
20221010	1st	C10	no	0	ESL0854	mono	C10_1
20221010	1st	D1	no	0	ESL0855	mono	D1_1
20221010	1st	D2	no	0	ESL0855	mono	D2_1
20221010	1st	D3	no	0	ESL0855	mono	D3_1
20221010	1st	D4	no	0	ESL0855	mono	D4_1
20221010	1st	D5	no	0	ESL0855	mono	D5_1
20221010	1st	D6	no	0	ESL0855	mono	D6_1
20221010	1st	D7	no	0	ESL0855	mono	D7_1
20221010	1st	D8	no	0	ESL0855	mono	D8_1
20221010	1st	D9	no	0	ESL0855	mono	D9_1
20221010	1st	D10	no	0	ESL0855	mono	D10_1
20221010	1st	E1	no	0	ESL0856	mono	E1_1
20221010	1st	E2	no	0	ESL0856	mono	E2_1
20221010	1st	E3	no	0	ESL0856	mono	E3_1
20221010	1st	E4	no	0	ESL0856	mono	E4_1
20221010	1st	E5	no	0	ESL0856	mono	E5_1
20221010	1st	E6	no	0	ESL0856	mono	E6_1
20221010	1st	E7	no	0	ESL0856	mono	E7_1
20221010	1st	E8	no	0	ESL0856	mono	E8_1
20221010	1st	E9	no	0	ESL0856	mono	E9_1
20221010	1st	E10	no	0	ESL0856	mono	E10_1
20221010	1st	F1	yes	1	ESL0888	mono	F1_1
20221010	1st	F2	yes	1	ESL0888	mono	F2_1
20221010	1st	F3	yes	1	ESL0888	mono	F3_1
20221010	1st	F4	yes	1	ESL0888	mono	F4_1
20221010	1st	F5	yes	1	ESL0888	mono	F5_1
20221010	1st	F6	yes	1	ESL0888	mono	F6_1
20221010	1st	F7	yes	1	ESL0888	mono	F7_1
20221010	1st	F8	yes	1	ESL0888	mono	F8_1
20221010	1st	F9	yes	1	ESL0888	mono	F9_1
20221010	1st	F10	yes	1	ESL0888	mono	F10_1
20221010	1st	G1	no	0	ESL0921	mono	G1_1
20221010	1st	G2	no	0	ESL0921	mono	G2_1
20221010	1st	G3	no	0	ESL0921	mono	G3_1
20221010	1st	G4	no	0	ESL0921	mono	G4_1
20221010	1st	G5	no	0	ESL0921	mono	G5_1
20221010	1st	G6	no	0	ESL0921	mono	G6_1
20221010	1st	G7	no	0	ESL0921	mono	G7_1
20221010	1st	G8	no	0	ESL0921	mono	G8_1
20221010	1st	G9	no	0	ESL0921	mono	G9_1
20221010	1st	G10	no	0	ESL0921	mono	G10_1
20221010	1st	H1	yes	1	ESL0957	mono	H1_1
20221010	1st	H2	yes	1	ESL0957	mono	H2_1
20221010	1st	H3	yes	1	ESL0957	mono	H3_1
20221010	1st	H4	no	0	ESL0957	mono	H4_1
20221010	1st	H5	yes	1	ESL0957	mono	H5_1
20221010	1st	H6	yes	1	ESL0957	mono	H6_1
20221010	1st	H7	no	0	ESL0957	mono	H7_1
20221010	1st	H8	yes	1	ESL0957	mono	H8_1
20221010	1st	H9	no	0	ESL0957	mono	H9_1
20221010	1st	H10	no	0	ESL0957	mono	H10_1
20221010	1st	I1	no	0	ESL0158	comm13	I1_1
20221010	1st	I2	no	0	ESL0158	comm13	I2_1
20221010	1st	I3	no	0	ESL0158	comm13	I3_1
20221010	1st	I4	no	0	ESL0158	comm13	I4_1
20221010	1st	I5	no	0	ESL0158	comm13	I5_1
20221010	1st	I6	no	0	ESL0158	comm13	I6_1
20221010	1st	I7	no	0	ESL0158	comm13	I7_1
20221010	1st	I8	no	0	ESL0158	comm13	I8_1
20221010	1st	I9	no	0	ESL0158	comm13	I9_1
20221010	1st	I10	no	0	ESL0158	comm13	I10_1
20221010	1st	J1	yes	1	ESL0868	comm13	J1_1
20221010	1st	J2	yes	1	ESL0868	comm13	J2_1
20221010	1st	J3	yes	1	ESL0868	comm13	J3_1
20221010	1st	J4	yes	1	ESL0868	comm13	J4_1
20221010	1st	J5	yes	1	ESL0868	comm13	J5_1
20221010	1st	J6	yes	1	ESL0868	comm13	J6_1
20221010	1st	J7	yes	1	ESL0868	comm13	J7_1
20221010	1st	J8	yes	1	ESL0868	comm13	J8_1
20221010	1st	J9	no	0	ESL0868	comm13	J9_1
20221010	1st	J10	yes	1	ESL0868	comm13	J10_1
20221010	1st	K1	no	0	ESL0854	comm13	K1_1
20221010	1st	K2	no	0	ESL0854	comm13	K2_1
20221010	1st	K3	yes	1	ESL0854	comm13	K3_1
20221010	1st	K4	yes	1	ESL0854	comm13	K4_1
20221010	1st	K5	no	0	ESL0854	comm13	K5_1
20221010	1st	K6	yes	1	ESL0854	comm13	K6_1
20221010	1st	K7	yes	1	ESL0854	comm13	K7_1
20221010	1st	K8	no	0	ESL0854	comm13	K8_1
20221010	1st	K9	no	0	ESL0854	comm13	K9_1
20221010	1st	K10	no	0	ESL0854	comm13	K10_1
20221010	1st	L1	no	0	ESL0855	comm13	L1_1
20221010	1st	L2	no	0	ESL0855	comm13	L2_1
20221010	1st	L3	no	0	ESL0855	comm13	L3_1
20221010	1st	L4	no	0	ESL0855	comm13	L4_1
20221010	1st	L5	no	0	ESL0855	comm13	L5_1
20221010	1st	L6	no	0	ESL0855	comm13	L6_1
20221010	1st	L7	no	0	ESL0855	comm13	L7_1
20221010	1st	L8	no	0	ESL0855	comm13	L8_1
20221010	1st	L9	no	0	ESL0855	comm13	L9_1
20221010	1st	L10	no	0	ESL0855	comm13	L10_1
20221010	1st	M1	no	0	ESL0856	comm13	M1_1
20221010	1st	M2	no	0	ESL0856	comm13	M2_1
20221010	1st	M3	no	0	ESL0856	comm13	M3_1
20221010	1st	M4	no	0	ESL0856	comm13	M4_1
20221010	1st	M5	no	0	ESL0856	comm13	M5_1
20221010	1st	M6	no	0	ESL0856	comm13	M6_1
20221010	1st	M7	no	0	ESL0856	comm13	M7_1
20221010	1st	M8	no	0	ESL0856	comm13	M8_1
20221010	1st	M9	no	0	ESL0856	comm13	M9_1
20221010	1st	M10	no	0	ESL0856	comm13	M10_1
20221010	1st	N1	yes	1	ESL0888	comm13	N1_1
20221010	1st	N2	yes	1	ESL0888	comm13	N2_1
20221010	1st	N3	no	0	ESL0888	comm13	N3_1
20221010	1st	N4	yes	1	ESL0888	comm13	N4_1
20221010	1st	N5	yes	1	ESL0888	comm13	N5_1
20221010	1st	N6	yes	1	ESL0888	comm13	N6_1
20221010	1st	N7	yes	1	ESL0888	comm13	N7_1
20221010	1st	N8	yes	1	ESL0888	comm13	N8_1
20221010	1st	N9	yes	1	ESL0888	comm13	N9_1
20221010	1st	N10	no	0	ESL0888	comm13	N10_1
20221010	1st	O1	no	0	ESL0921	comm13	O1_1
20221010	1st	O2	no	0	ESL0921	comm13	O2_1
20221010	1st	O3	no	0	ESL0921	comm13	O3_1
20221010	1st	O4	no	0	ESL0921	comm13	O4_1
20221010	1st	O5	no	0	ESL0921	comm13	O5_1
20221010	1st	O6	no	0	ESL0921	comm13	O6_1
20221010	1st	O7	no	0	ESL0921	comm13	O7_1
20221010	1st	O8	no	0	ESL0921	comm13	O8_1
20221010	1st	O9	no	0	ESL0921	comm13	O9_1
20221010	1st	O10	no	0	ESL0921	comm13	O10_1
20221010	1st	P1	no	0	ESL0957	comm13	P1_1
20221010	1st	P2	no	0	ESL0957	comm13	P2_1
20221010	1st	P3	no	0	ESL0957	comm13	P3_1
20221010	1st	P4	no	0	ESL0957	comm13	P4_1
20221010	1st	P5	no	0	ESL0957	comm13	P5_1
20221010	1st	P6	no	0	ESL0957	comm13	P6_1
20221010	1st	P7	no	0	ESL0957	comm13	P7_1
20221010	1st	P8	yes	1	ESL0957	comm13	P8_1
20221010	1st	P9	no	0	ESL0957	comm13	P9_1
20221010	1st	P10	no	0	ESL0957	comm13	P10_1
20221017	2nd	A1	no	0	ESL0158	mono	A1_2
20221017	2nd	A2	no	0	ESL0158	mono	A2_2
20221017	2nd	A3	no	0	ESL0158	mono	A3_2
20221017	2nd	A4	no	0	ESL0158	mono	A4_2
20221017	2nd	A5	no	0	ESL0158	mono	A5_2
20221017	2nd	A6	no	0	ESL0158	mono	A6_2
20221017	2nd	A7	no	0	ESL0158	mono	A7_2
20221017	2nd	A8	no	0	ESL0158	mono	A8_2
20221017	2nd	A9	no	0	ESL0158	mono	A9_2
20221017	2nd	A10	no	0	ESL0158	mono	A10_2
20221017	2nd	I1	no	0	ESL0158	comm13	I1_2
20221017	2nd	I2	no	0	ESL0158	comm13	I2_2
20221017	2nd	I3	no	0	ESL0158	comm13	I3_2
20221017	2nd	I4	no	0	ESL0158	comm13	I4_2
20221017	2nd	I5	no	0	ESL0158	comm13	I5_2
20221017	2nd	I6	no	0	ESL0158	comm13	I6_2
20221017	2nd	I7	no	0	ESL0158	comm13	I7_2
20221017	2nd	I8	no	0	ESL0158	comm13	I8_2
20221017	2nd	I9	no	0	ESL0158	comm13	I9_2
20221017	2nd	I10	no	0	ESL0158	comm13	I10_2
20221017	2nd	D1	no	0	ESL0855	mono	D1_2
20221017	2nd	D2	no	0	ESL0855	mono	D2_2
20221017	2nd	D3	no	0	ESL0855	mono	D3_2
20221017	2nd	D4	no	0	ESL0855	mono	D4_2
20221017	2nd	D5	no	0	ESL0855	mono	D5_2
20221017	2nd	D6	no	0	ESL0855	mono	D6_2
20221017	2nd	D7	no	0	ESL0855	mono	D7_2
20221017	2nd	D8	no	0	ESL0855	mono	D8_2
20221017	2nd	D9	no	0	ESL0855	mono	D9_2
20221017	2nd	D10	no	0	ESL0855	mono	D10_2
20221017	2nd	L1	no	0	ESL0855	comm13	L1_2
20221017	2nd	L2	no	0	ESL0855	comm13	L2_2
20221017	2nd	L3	no	0	ESL0855	comm13	L3_2
20221017	2nd	L4	no	0	ESL0855	comm13	L4_2
20221017	2nd	L5	no	0	ESL0855	comm13	L5_2
20221017	2nd	L6	no	0	ESL0855	comm13	L6_2
20221017	2nd	L7	no	0	ESL0855	comm13	L7_2
20221017	2nd	L8	no	0	ESL0855	comm13	L8_2
20221017	2nd	L9	no	0	ESL0855	comm13	L9_2
20221017	2nd	L10	no	0	ESL0855	comm13	L10_2
20221017	2nd	F1	yes	1	ESL0888	mono	F1_2
20221017	2nd	F2	yes	1	ESL0888	mono	F2_2
20221017	2nd	F3	yes	1	ESL0888	mono	F3_2
20221017	2nd	F4	yes	1	ESL0888	mono	F4_2
20221017	2nd	F5	no	0	ESL0888	mono	F5_2
20221017	2nd	F6	yes	1	ESL0888	mono	F6_2
20221017	2nd	F7	yes	1	ESL0888	mono	F7_2
20221017	2nd	F8	yes	1	ESL0888	mono	F8_2
20221017	2nd	N1	no	0	ESL0888	comm13	N1_2
20221017	2nd	N2	yes	1	ESL0888	comm13	N2_2
20221017	2nd	N3	no	0	ESL0888	comm13	N3_2
20221017	2nd	N4	no	0	ESL0888	comm13	N4_2
20221017	2nd	N5	yes	1	ESL0888	comm13	N5_2
20221017	2nd	N6	yes	1	ESL0888	comm13	N6_2
20221017	2nd	N7	no	0	ESL0888	comm13	N7_2
20221017	2nd	N8	yes	1	ESL0888	comm13	N8_2
20221017	2nd	N9	yes	1	ESL0888	comm13	N9_2
20221017	2nd	N10	no	0	ESL0888	comm13	N10_2
20221017	2nd	H1	no	0	ESL0957	mono	H1_2
20221017	2nd	H2	no	0	ESL0957	mono	H2_2
20221017	2nd	H3	no	0	ESL0957	mono	H3_2
20221017	2nd	H4	yes	1	ESL0957	mono	H4_2
20221017	2nd	H5	no	0	ESL0957	mono	H5_2
20221017	2nd	H6	no	0	ESL0957	mono	H6_2
20221017	2nd	H7	no	0	ESL0957	mono	H7_2
20221017	2nd	P1	no	0	ESL0957	comm13	P1_2
20221017	2nd	P2	no	0	ESL0957	comm13	P2_2
20221017	2nd	P3	no	0	ESL0957	comm13	P3_2
20221017	2nd	P4	no	0	ESL0957	comm13	P4_2
20221017	2nd	P5	no	0	ESL0957	comm13	P5_2
20221017	2nd	P6	no	0	ESL0957	comm13	P6_2
20221017	2nd	P7	no	0	ESL0957	comm13	P7_2
20221017	2nd	P8	no	0	ESL0957	comm13	P8_2
20221017	2nd	P9	no	0	ESL0957	comm13	P9_2
20221017	2nd	P10	yes	1	ESL0957	comm13	P10_2
20221017	2nd	K1	no	0	ESL0854	comm13	K1_2
20221017	2nd	K2	yes	1	ESL0854	comm13	K2_2
20221017	2nd	K3	no	0	ESL0854	comm13	K3_2
20221017	2nd	K4	yes	1	ESL0854	comm13	K4_2
20221017	2nd	K5	no	0	ESL0854	comm13	K5_2
20221017	2nd	K6	no	0	ESL0854	comm13	K6_2
20221017	2nd	K7	no	0	ESL0854	comm13	K7_2
20221017	2nd	K8	yes	1	ESL0854	comm13	K8_2
20221017	2nd	K9	no	0	ESL0854	comm13	K9_2
20221017	2nd	K10	no	0	ESL0854	comm13	K10_2
20221017	2nd	C1	no	0	ESL0854	mono	C1_2
20221017	2nd	C2	yes	1	ESL0854	mono	C2_2
20221017	2nd	C3	yes	1	ESL0854	mono	C3_2
20221017	2nd	C4	no	0	ESL0854	mono	C4_2
20221017	2nd	C5	no	0	ESL0854	mono	C5_2
20221017	2nd	C6	no	0	ESL0854	mono	C6_2
20221017	2nd	C7	yes	1	ESL0854	mono	C7_2
20221017	2nd	C8	no	0	ESL0854	mono	C8_2
20221017	2nd	C9	no	0	ESL0854	mono	C9_2
20221017	2nd	C10	no	0	ESL0854	mono	C10_2
20221017	2nd	B1	yes	1	ESL0868	mono	B1_2
20221017	2nd	B2	yes	1	ESL0868	mono	B2_2
20221017	2nd	B3	yes	1	ESL0868	mono	B3_2
20221017	2nd	B4	no	0	ESL0868	mono	B4_2
20221017	2nd	B5	no	0	ESL0868	mono	B5_2
20221017	2nd	B6	yes	1	ESL0868	mono	B6_2
20221017	2nd	B7	yes	1	ESL0868	mono	B7_2
20221017	2nd	B8	no	0	ESL0868	mono	B8_2
20221017	2nd	B9	yes	1	ESL0868	mono	B9_2
20221017	2nd	B10	yes	1	ESL0868	mono	B10_2
20221017	2nd	J1	yes	1	ESL0868	comm13	J1_2
20221017	2nd	J2	yes	1	ESL0868	comm13	J2_2
20221017	2nd	J3	no	0	ESL0868	comm13	J3_2
20221017	2nd	J4	no	0	ESL0868	comm13	J4_2
20221017	2nd	J5	yes	1	ESL0868	comm13	J5_2
20221017	2nd	J6	yes	1	ESL0868	comm13	J6_2
20221017	2nd	J7	yes	1	ESL0868	comm13	J7_2
20221017	2nd	J8	yes	1	ESL0868	comm13	J8_2
20221017	2nd	J9	yes	1	ESL0868	comm13	J9_2
20221017	2nd	J10	yes	1	ESL0868	comm13	J10_2
20221017	2nd	O1	no	0	ESL0921	comm13	O1_2
20221017	2nd	O2	no	0	ESL0921	comm13	O2_2
20221017	2nd	O3	no	0	ESL0921	comm13	O3_2
20221017	2nd	O4	no	0	ESL0921	comm13	O4_2
20221017	2nd	O5	no	0	ESL0921	comm13	O5_2
20221017	2nd	O6	no	0	ESL0921	comm13	O6_2
20221017	2nd	O7	no	0	ESL0921	comm13	O7_2
20221017	2nd	O8	no	0	ESL0921	comm13	O8_2
20221017	2nd	O9	no	0	ESL0921	comm13	O9_2
20221017	2nd	M1	no	0	ESL0856	comm13	M1_2
20221017	2nd	M2	no	0	ESL0856	comm13	M2_2
20221017	2nd	M3	no	0	ESL0856	comm13	M3_2
20221017	2nd	M4	no	0	ESL0856	comm13	M4_2
20221017	2nd	M5	no	0	ESL0856	comm13	M5_2
20221017	2nd	M6	no	0	ESL0856	comm13	M6_2
20221017	2nd	M7	no	0	ESL0856	comm13	M7_2
20221017	2nd	M8	no	0	ESL0856	comm13	M8_2
20221017	2nd	M9	no	0	ESL0856	comm13	M9_2
20221017	2nd	M10	no	0	ESL0856	comm13	M10_2
20221017	2nd	E1	no	0	ESL0856	mono	E1_2
20221017	2nd	E2	no	0	ESL0856	mono	E2_2
20221017	2nd	E3	no	0	ESL0856	mono	E3_2
20221017	2nd	E4	no	0	ESL0856	mono	E4_2
20221017	2nd	E5	no	0	ESL0856	mono	E5_2
20221017	2nd	E6	no	0	ESL0856	mono	E6_2
20221017	2nd	E7	no	0	ESL0856	mono	E7_2
20221017	2nd	E8	no	0	ESL0856	mono	E8_2
20221017	2nd	E9	no	0	ESL0856	mono	E9_2
20221017	2nd	E10	no	0	ESL0856	mono	E10_2
20221017	2nd	G1	no	0	ESL0921	mono	G1_2
20221017	2nd	G2	no	0	ESL0921	mono	G2_2
20221017	2nd	G3	no	0	ESL0921	mono	G3_2
20221017	2nd	G4	no	0	ESL0921	mono	G4_2
20221017	2nd	G5	no	0	ESL0921	mono	G5_2
20221017	2nd	G6	no	0	ESL0921	mono	G6_2
20221017	2nd	G7	no	0	ESL0921	mono	G7_2
20221017	2nd	G8	no	0	ESL0921	mono	G8_2
20221017	2nd	G9	no	0	ESL0921	mono	G9_2
20221017	2nd	G10	no	0	ESL0921	mono	G10_2
